# Supplementary material for: The presence of bacteria varies between colorectal adenocarcinomas, precursor lesions and non-malignant tissue
Source: BMC Cancer. 2019 Apr 29;19:399. doi: 10.1186/s12885-019-5571-y (PMC6489238; doi:10.1186/s12885-019-5571-y)
Supplement: Supplementary file 1 — qPCR results. Quantification cycles obtained using qPCR and clinical information for each clinical sample, investigated in this study. (XLSX 103 kb) [file 12885_2019_5571_MOESM1_ESM.xlsx]

## Sheet: CRC (tumor + paired normal tiss
Positive
Negative
Negative. Ct are below thresshold, but the melting curve reveal that signal are unspecific
				TMN Stage					S. gallolyticus spp.				S. gallolyticus subsp. gallolyticus				F. nucleatum				B. fragilis				B-actin						S. gallolyticus spp.				S. gallolyticus subsp. gallolyticus				F. nucleatum				B. fragilis				B-actin
Sample ID	Age group	Sample age (years)	Location	pT	pN	pM	pV	Rank	Ct 1	Ct 2	Ct 3	Mean	Ct 1	Ct 2	Ct 3	Mean	Ct 1	Ct 2	Ct 3	Mean	Ct 1	Ct 2	Ct 3	Mean	Ct 1	Ct 2	Ct 3	Mean		Sample ID	Ct 1	Ct 2	Ct 3	Mean	Ct 1	Ct 2	Ct 3	Mean	Ct 1	Ct 2	Ct 3	Mean	Ct 1	Ct 2	Ct 3	Mean	Ct 1	Ct 2	Ct 3
K001T	70-79	5	Ascedens	3	1	0	0	III	37.45	37.34	36.91	37.2333	35.15	35.49	34.95	35.1967	33.59	34.68	33.11	33.7933	28.69	29.04	28.85	28.86	22.44	22.7	23.03	22.7233		K001R	34.84	35.2	36.14	35.3933	34.02	34.74	35.04	34.6	31.51	31.97	31.92	31.8	26.25	26.23	26.17	26.2167	23.19	23.03	23.29
K002T	80-89	5	Caecum	4	2	0	0	III	37.95	35.74	35.65	36.4467	34.57	34.83	34.74	34.7133	32.31	32.12	32.38	32.27	29.58	29.52	29.17	29.4233	22.19	22.28	22.54	22.3367
K003T	50-59	5	Sigmoideum	1	0	0	0	I	34.95	34.12	34.34	34.47	34.14	33.49	33.97	33.8667	34.26	34.45	32.33	33.68	28.6	28.44	29.55	28.8633	22.68	22.77	23.18	22.8767		K003R	36.27	35.95	35.67	35.9633	34.75	35.44	35.67	35.2867	33.8	33.92	34.53	34.0833	29.32	29.28	29.07	29.2233	22.63	22.93	23.08
K004T	80-89	5	Transversum	3	1	0	0	III	37.96	37.66	38.4	38.0067	35.21	34.84	34.65	34.9	29.74	31.29	31.35	30.7933	31.88	31.55	31.42	31.6167	25.52	25.53	25.86	25.6367
K005T	70-79	5	Sigmoideum	3	2	0	0	III	36.06	36.22	36.31	36.1967	33.62	35.11	33.65	34.1267	29.5	29.61	29.43	29.5133	29.95	30.05	30.23	30.0767	22.81	22.99	23.32	23.04		K005R	34.99	35.41	36.67	35.69	35.22	36.96	34.5	35.56	28.28	28.44	28.69	28.47	29.27	29.38	29.02	29.2233	23.12	23.31	23.35
K006T	60-69	5	Sigmoideum	3	1	0	1	III	38.22	36.65	36.09	36.9867	36.75	35.85	34.54	35.7133	30.37	31.1	31.62	31.03	28.97	29.2	28.91	29.0267	23.52	23.64	23.84	23.6667		K006R	35.26	36.1	37.17	36.1767	34.73	34.5	36.23	35.1533	33.63	33.25	34.57	33.8167	29.81	29.3	31.07	30.06	22.71	22.92	23.2
K007T	80-89	5	Transversum	4	1	1	0	IV	35.9	36.56	36.74	36.4	35.28	34.11	35.17	34.8533	27.54	27.55	27.52	27.5367	27.83	27.92	27.99	27.9133	22.76	22.34	22.62	22.5733		K007R	34.19	34.72	35.18	34.6967	33.78	33.26	34.35	33.7967	27.25	27.5	27.49	27.4133	25.91	25.98	25.7	25.8633	21.68	21.84	22.12
K008T	60-69	5	Ascedens	4	1	1	0	IV	35.61	35.5	36.38	35.83	34.74	34.5	34.13	34.4567	25.77	26	26.15	25.9733	28.92	28.13	28.26	28.4367	21.45	21.31	21.75	21.5033		K008R	34.56	35.23	35.63	35.14	34.14	34.41	34.16	34.2367	27.43	26.92	27.66	27.3367	27.8	27.79	27.74	27.7767	22.04	22.21	22.5
K009T	60-69	5	Sigmoideum	4	2	1	0	IV	35.74	35.35	34.89	35.3267	35.29	34.55	34.06	34.6333	27.5	27.87	27.88	27.75	29.96	30.7	30.37	30.3433	22.96	23.33	23.97	23.42		K009R	33.59	33.79	34.08	33.82	33.72	33.38	33.13	33.41	28.95	29.27	29.87	29.3633	27.97	28.2	28.01	28.06	22.69	22.68	22.86
K010T	70-79	5	Sigmoideum	3	1	0	1	III	36.46	36.05	35.88	36.13	34.98	34.24	34.32	34.5133	30.98	30.98	31.94	31.3	30.44	30.91	30.2	30.5167	22.63	22.66	23.13	22.8067		K010R	35.17	35.9	35.66	35.5767	34.32	33.92	35.08	34.44	27.54	27.24	27.43	27.4033	28.51	28.43	28.45	28.4633	23.14	23.08	23.2
K011T	70-79	5	Transversum	3	1	1	0	IV	40	35.82	36.59	37.47	37.3	34.99	35.23	35.84	34.62	33.69	33.92	34.0767	31.27	31.62	31.26	31.3833	25.87	25.82	26.25	25.98		K011R	35.24	37.09	35.51	35.9467	35.66	34.58	36.16	35.4667	31.16	31.59	31.9	31.55	29.13	29.56	29.99	29.56	24.84	-	25.55
K012T	70-79	5	Caecum	3	?	?	0	III	38.84	36.98	38.37	38.0633	36	35.85	35.68	35.8433	27.91	27.82	27.82	27.85	30.17	30.05	-	30.11	26.85	26.99	27.23	27.0233
K013T	80-89	5	Sigmoideum	3	0	0	0	II	36.78	36.88	36.66	36.7733	35.26	34.97	34.97	35.0667	30.21	30.37	30.24	30.2733	29.82	29.61	29.41	29.6133	22.27	22.26	22.61	22.38		K013R	35.87	35.12	35.19	35.3933	34.49	34.32	34.26	34.3567	25.71	25.89	26.22	25.94	25.55	25.46	25.96	25.6567	21.77	21.85	22.17
K014T	50-59	5	Caecum	3	0	0	0	II	36.73	38.43	39.11	38.09	34.88	34.54	34.4	34.6067	25.56	25.57	25.76	25.63	25.91	25.86	25.86	25.8767	22.2	22.32	22.43	22.3167		K014R	36.33	36.78	35.92	36.3433	35.09	34.93	35.68	35.2333	26.65	26.64	26.57	26.62	26.46	26.64	26.41	26.5033	22.74	22.86	23.18
K015T	80-89	5	Sigmoideum	3	1	0	0	III	37.64	36.92	37.67	37.41	35.87	36.73	36.22	36.2733	33.76	32.01	32.89	32.8867	31.37	31.37	31.46	31.4	25.01	25.15	25.32	25.16		K015R	38.64	37.28	37.23	37.7167	36.77	35.51	36.07	36.1167	31.61	31.15	31.82	31.5267	31.33	30.72	30.61	30.8867	25.32	25.35	25.69
K016T	80-89	5	Transversum	3	2	0	0	III	36.08	37.55	37.19	36.94	36.99	37.46	35.57	36.6733	32.82	32.41	33.87	33.0333	30.52	30.17	30.53	30.4067	22.47	22.55	22.98	22.6667		K016R	35.13	35.21	35.06	35.1333	34.48	35.24	35.18	34.9667	29.71	29.71	29.86	29.76	29.12	29.11	29.14	29.1233	23.23	23.2	23.54
K017T	70-79	5	Sigmoideum	3	2	0	0	III	36.32	35.65	36.6	36.19	35.68	35.36	34.94	35.3267	31.29	31.63	31.67	31.53	28.81	29.11	28.6	28.84	22.24	22.19	22.63	22.3533		K017R	36.76	36.43	36.01	36.4	34.68	35.47	35.46	35.2033	27.97	27.87	28.04	27.96	25.91	25.741	25.51	25.7203	22.46	22.43	22.47
K018T	>90	5	Transversum	4	0	0	0	II	36.01	35.78	36.83	36.2067	35.52	34.96	35.45	35.31	32.5	31.87	31.85	32.0733	28.31	28.36	27.97	28.2133	20.96	20.93	21.12	21.0033		K018R	35.85	35.52	35	35.4567	34.59	34.47	34.57	34.5433	28.72	28.54	28.46	28.5733	26.62	26.62	26.54	26.5933	21.87	21.85	22.06
K019T	60-69	5	Descendens	3	0	0	0	II	37.02	36.91	36	36.6433	35.2	35.34	34.87	35.1367	31.04	31.01	31.1	31.05	30.55	30.61	30.11	30.4233	25.21	25.42	25.3	25.31		K019R	39.01	38.03	36.52	37.8533	36.16	37.36	36.29	36.6033	28.31	28.67	28.51	28.4967	28.07	27.57	27.34	27.66	24.62	24.67	24.92
K020T	60-69	5	Ascedens	4	1	0	0	III	36.03	38.17	36.08	36.76	37.21	36.35	35.51	36.3567	37.43	35.75	34.86	36.0133	29.93	29.85	29.8	29.86	22.16	21.95	22.35	22.1533		K020R	36.83	35.75	35.74	36.1067	33.97	34.4	35	34.4567	35.61	36.41	34.72	35.58	29.94	29.66	29.76	29.7867	22.2	22.32	22.69
K021T	60-69	5	Descendens	3	2	0	0	III	36.15	36.25	36.29	36.23	35.9	36.15	35.96	36.0033	31.41	32.1	31.93	31.8133	29.02	28.99	28.9	28.97	22.65	22.85	22.98	22.8267
K022T	50-59	5	Sigmoideum	3	0	0	0	II	37.51	39.97	40	39.16	35.17	35.02	34.77	34.9867	29.24	29.55	29.38	29.39	28.05	28.44	28	28.1633	22.41	22.36	22.88	22.55
K023T	80-89	5	Caecum	3	0	0	0	II	35.76	35.03	35.99	35.5933	34.56	34.94	34.06	34.52	25.12	25.22	25.2	25.18	27.21	27.23	26.92	27.12	22.95	23.08	23.3	23.11
K024T	70-79	5	Caecum	3	1	0	0	III	36.27	36.42	35.79	36.16	34.25	34.14	33.5	33.9633	28.22	22.4	28.44	26.3533	28.43	28.57	28.61	28.5367	22.1	21.98	22.49	22.19		K024R	34.77	35.23	35.47	35.1567	34.15	34	33.99	34.0467	27.7	27.91	27.87	27.8267	26.65	26.63	26.54	26.6067	22.61	22.5	23.12
K025T	80-89	5	Caecum	4	1	1	0	IV	37.28	35.65	35.88	36.27	35.24	34.97	34.53	34.9133	32.19	32.17	32.48	32.28	28.86	28.77	28.73	28.7867	22.23	22.04	22.49	22.2533		K025R	35.37	35	35.57	35.3133	34.21	33.26	33.95	33.8067	26.91	26.87	27.33	27.0367	25.92	26.15	25.78	25.95	22.33	22.43	22.85
K026T	60-69	5	Caecum	3	0	0	0	II	34.58	34.41	33.87	34.2867	32.91	32.67	32.38	32.6533	23.31	23.22	23.34	23.29	23.81	23.71	23.7	23.74	22.75	22.74	23.14	22.8767		K026R	33.99	34.86	34.49	34.4467	33.6	33.31	34.18	33.6967	29.79	30.14	30.13	30.02	27.42	27.43	27.47	27.44	22.61	22.65	23.18
K027T	70-79	5	Sigmoideum	4	2	0	1	III	40	37.57	39.82	39.13	34.69	34.54	34.31	34.5133	33.14	34.16	34.26	33.8533	31.88	31.48	31.68	31.68	25.56	25.71	25.92	25.73		K027R	38.57	36.58	40	38.3833	33.94	33.54	33.95	33.81	31.52	32.51	32.23	32.0867	30.12	30.1	30.13	30.1167	25.95	25.91	26.47
K028T	50-59	5	Caecum	3	1	0	0	III	36.71	36.4	37	36.7033	35.6	35	35.15	35.25	32.86	33.41	32.66	32.9767	29.59	29.32	29.25	29.3867	23.09	23.12	23.56	23.2567
K029T	80-89	5	Sigmoideum	4	2	0	1	III	37.64	38.22	37.08	37.6467	37.29	37.57	37.26	37.3733	32.1	32.81	32.56	32.49	30.34	30.29	30.24	30.29	22.67	22.36	22.92	22.65		K029R	35.9	36.76	36.86	36.5067	35.47	34.97	35.52	35.32	29.86	29.71	29.79	29.7867	28.61	28.9	29.2	28.9033	21.87	21.89	22.42
K030T	80-89	5	Caecum	3	1	0	0	III	35.75	35.36	35.52	35.5433	35.25	35.98	35.87	35.7	29.45	28.82	29.09	29.12	27.12	27.02	27.01	27.05	22.15	22	22.41	22.1867		K030R	34.05	35.01	37.38	35.48	34.57	34.74	34.48	34.5967	30.21	30.43	30.27	30.3033	26.79	26.97	27.18	26.98	22.26	22.36	22.69
K031T	60-69	5	Sigmoideum	2	0	0	0	I	40	38.08	36.53	38.2033	35.83	36.14	35.69	35.8867	32.63	33.03	36.19	33.95	31.24	30.66	30.96	30.9533	26.54	26.42	26.71	26.5567		K031R	38.63	35.8	38.49	37.64	35.77	36.2	35.19	35.72	32.19	31.88	32.8	32.29	29.27	27.2	29.02	28.4967	26.54	26.78	27.31
K032T	60-69	5	Caecum	4	2	1	0	IV	35.2	36.08	35.61	35.63	35.8	35.16	35.22	35.3933	30.15	30.18	30.38	30.2367	29.2	29.51	29.38	29.3633	23.05	23.21	23.3	23.1867		K032R	36.39	34.56	35.03	35.3267	33.04	33.3	33.03	33.1233	28.67	28.97	29.06	28.9	28.57	28.6	28.37	28.5133	22.86	22.79	23.07
K033T	60-69	5	Sigmoideum	3	0	0	0	II	34.9	34.15	34.33	34.46	35.49	34.71	34.1	34.7667	30.92	31.18	30.73	30.9433	27.91	28.23	27.88	28.0067	21.68	21.59	21.96	21.7433
K034T	60-69	5	Caecum	3	0	0	0	II	37.6	39.12	40	38.9067	34.77	35.21	35.83	35.27	32.79	32.45	29.15	31.4633	30.64	31.19	30.46	30.7633	25.45	25.59	25.79	25.61
K035T	50-59	5	Transversum	3	0	0	0	II	35.83	35.6	36.28	35.9033	34.7	35.13	35.32	35.05	30.18	30.33	30.49	30.3333	28.12	28.17	28.14	28.1433	22.85	22.7	22.99	22.8467		K035R	36.61	37.08	35.55	36.4133	34.44	34.99	35	34.81	27.56	27.6	27.72	27.6267	26.65	26.55	26.61	26.6033	22.75	23.05	23.21
K036T	60-69	5	Sigmoideum	4	2	0	0	III	36.3	36.45	36.81	36.52	35.39	35.61	35.89	35.63	26.78	26.74	26.9	26.8067	25.08	24.91	24.81	24.9333	21.79	21.73	22.06	21.86		K036R	33.86	33.73	33.16	33.5833	33.64	33.93	33.92	33.83	31.84	31.6	31.84	31.76	27.77	27.64	27.58	27.6633	22.18	22.098	22.48
K037T	70-79	5	Sigmoideum	3	0	0	0	II	35.79	35.03	35.65	35.49	34.3	34.81	33.6	34.2367	30.58	30.77	30.95	30.7667	27.65	27.74	27.35	27.58	22.02	22.09	22.554	22.2213		K037R	36.34	35.92	34.97	35.7433	34.93	35.05	35.13	35.0367	27.58	27.57	27.71	27.62	24.43	24.05	24.26	24.2467	22	22.24	22.45
K038T	60-69	5	Sigmoideum	2	0	0	0	I	36.29	35.74	35.33	35.7867	34.57	34.22	33.77	34.1867	31.29	31.29	31.34	31.3067	28.12	28.11	28.07	28.1	22.22	22.19	22.54	22.3167		K038R	32.91	32.46	32.62	32.6633	31.54	32.02	32.16	31.9067	30.02	30.78	30.89	30.5633	27.55	27.38	27.13	27.3533	22.27	22.39	22.48
K039T	60-69	5	Sigmoideum	3	1	0	0	III	37.74	36.22	38.13	37.3633	37.24	35.44	37.05	36.5767	30.27	29.83	29.94	30.0133	29.81	29.81	29.57	29.73	22.91	22.94	23.32	23.0567		K039R	34.66	34.01	33.61	34.0933	33.48	33.43	33.32	33.41	27.13	26.94	27.13	27.0667	26.87	26.71	26.75	26.7767	21.95	21.97	22.44
K040T	70-79	6	Sigmoideum	3	0	0	0	II	37.81	36.82	36.81	37.1467	34.87	35.23	34.99	35.03	33.46	33.38	33.27	33.37	29.26	29.37	29.33	29.32	21.85	21.89	22.12	21.9533
K041T	50-59	6	Sigmoideum	3	0	0	0	II	35.82	36.28	36.07	36.0567	36.22	35.88	36.87	36.3233	29.82	29.78	29.93	29.8433	29.32	29.3	29.1	29.24	21.76	21.83	21.87	21.82
K042T	60-69	6	Transversum	2	0	0	0	I	35.55	35.11	35.81	35.49	35.06	33.9	34.58	34.5133	27.92	27.98	27.88	27.9267	24.9	25.13	24.91	24.98	21.97	22.06	22.25	22.0933		K042R	35.44	36.2	34.86	35.5	34.91	35	35.59	35.1667	32.42	33.1	32.85	32.79	29.39	28.6	28.42	28.8033	22.05	22.2	22.39
K043T	40-49	6	Sigmoideum	3	1	0	0	III	37.32	36.55	36.29	36.72	36.1	37.14	36.79	36.6767	34.4	33.9	34.43	34.2433	30.42	30.27	30.54	30.41	22.82	22.81	23.1	22.91		K043R	35.19	35.05	34.4	34.88	34.84	34.93	35.72	35.1633	32.19	31.72	31.69	31.8667	23.12	23.02	23.2	23.1133	28.87	28.95	29.38
K044T	60-69	6	Descendens	4	1	0	0	III	36.66	36.32	37.42	36.8	34.22	34.41	33.96	34.1967	26.32	26.43	26.62	26.4567	22.5	22.27	22.03	22.2667	27.98	28.16	28.33	28.1567		K044R	34.75	34.67	35.13	34.85	34.29	34.2	34.52	34.3367	26.61	26.65	26.75	26.67	22.49	22.27	22.13	22.2967	25.43	25.26	25.6
K045T	70-79	6	Sigmoideum	3	1	0	0	III	38.55	36.24	38.23	37.6733	35.89	35.57	36	35.82	32.62	33.08	31.6	32.4333	25.8	25.75	25.67	25.74	31.44	31.36	32.1	31.6333
K046T	70-79	6	Descendens	3	0	0	0	II	36.5	36.4	35.88	36.26	35.34	34.74	34.66	34.9133	29.74	29.98	29.82	29.8467	22.43	22.06	21.99	22.16	28.56	28.57	28.65	28.5933
K047T	70-79	6	Sigmoideum	3	0	0	0	II	37.68	36.52	38.05	37.4167	35.63	36.28	35.09	35.6667	35.79	36.32	36.36	36.1567	31.41	31.2	31.76	31.4567	22.76	22.83	23.13	22.9067		K047R	36.86	34.98	36.17	36.0033	34.61	34.93	35.23	34.9233	33.56	34.03	33.82	33.8033	30.57	30.69	30.42	30.56	23.75	23.37	23.94
K048T	60-69	6	Sigmoideum	3	0	0	0	II	35.34	34.66	35.21	35.07	35.44	34.85	34.5	34.93	32.9	32.05	33.31	32.7533	29.77	30.1	29.48	29.7833	22.69	22.56	22.92	22.7233		K048R	34.45	34.17	35.14	34.5867	33.31	33.62	33.86	33.5967	28.74	28.61	29.08	28.81	28.46	28.49	28.38	28.4433	22.5	22.5	22.94
K049T	80-89	6	Caecum	3	0	0	0	II	39.99	36.85	35.28	37.3733	36	34.85	34.66	35.17	29.74	30.04	29.85	29.8767	30.31	30.22	29.78	30.1033	23.34	22.97	23.48	23.2633
K050T	80-89	6	Caecum	3	0	0	0	II	38.16	36.33	38.35	37.6133	34.33	37.24	35.84	35.8033	30.37	30.38	30.42	30.39	33.66	33.46	33.54	33.5533	27.08	27.04	27.46	27.1933		K050R	38.19	36.3	37.66	37.3833	36.97	36.46	36.31	36.58	32.84	32.3	32.13	32.4233	33.59	33.91	33.56	33.6867	26.48	26.44	26.72
K051T	60-69	6	Sigmoideum	3	1	0	0	III	39.96	37.54	38.11	38.5367	37.16	35.6	35.84	36.2	34.91	34.23	34.3	34.48	32.29	31.99	31.91	32.0633	22.8	22.81	23.15	22.92		K051R	34.73	34.84	34.87	34.8133	35.64	35.37	35.53	35.5133	33.06	32.78	33.45	33.0967	31.01	30.56	30.48	30.6833	22.79	22.54	22.71
K052T	60-69	6	Sigmoideum	3	0	0	0	II	36.48	37.94	38.03	37.4833	37.96	37.28	34.52	36.5867	33.86	35.79	34.34	34.6633	32.19	31.99	32.07	32.0833	22.37	22.43	22.68	22.4933		K052R	34.8	34.84	35.22	34.9533	35.65	36.15	36.09	35.9633	28.33	28.25	28.1	28.2267	29.34	29.25	29.23	29.2733	22.93	22.97	23.26
K053T	80-89	6	Descendens	3	0	0	0	II	40	36.54	38.83	38.4567	37.94	35.97	37.24	37.05	32.43	32.38	33.33	32.7133	31.03	30.22	30.22	30.49	25.36	25.74	25.66	25.5867		K053R	40	40	37.18	39.06	34.11	35.41	35.87	35.13	30.2	30.41	30.94	30.5167	32.64	32.16	30.83	31.8767	28.89	29.01	29.08
K054T	80-89	6	Sigmoideum	3	1	0	0	III	36.19	35.86	35.84	35.9633	35.44	35.12	35.27	35.2767	30.58	30.8	30.87	30.75	30.47	30.96	30.98	30.8033	23.99	23.77	24.01	23.9233
K055T	60-69	7	Transversum	3	0	0	0	II	37.49	38.79	37.24	37.84	37.46	35.15	34.65	35.7533	30.24	29.8	30.11	30.05	29.99	29.68	29.76	29.81	24.61	24.62	24.81	24.68		K055R	36.19	37.07	37.06	36.7733	33.86	35.36	33.85	34.3567	29.9	28.65	29.01	29.1867	26.79	26.75	26.49	26.6767	24.15	24.3	24.4
K056T	60-69	7	Ascedens	3	0	0	0	II	37.2	38.08	37.37	37.55	36.86	35.58	36.47	36.3033	35.58	36.3	34.91	35.5967	32	31.99	31.86	31.95	23.16	23.05	23.37	23.1933		K056R	37.51	36.26	36.35	36.7067	35.74	35.2	36.35	35.7633	26.99	27.15	26.96	27.0333	27.07	26.52	26.36	26.65	22.96	22.99	23.45
K057T	60-69	7	Ascedens	3	0	0	0	II	39.73	40	38.89	39.54	34.96	34.8	33.94	34.5667	33.68	32.66	32.41	32.9167	31.77	31.88	31.8	31.8167	23.51	23.71	24.03	23.75
K058T	70-79	7	Right colon flexur	3	1	0	0	III	36.42	36.88	36.5	36.6	35.21	34.68	34.59	34.8267	30.08	30.69	30.66	30.4767	30.34	30.28	30.35	30.3233	22.96	22.88	23.18	23.0067		K058R	36.37	36.32	36.15	36.28	34.3	34.5	34.63	34.4767	26.15	26.25	26.54	26.3133	26.99	27	26.8	26.93	23	23.12	23.4
K059T	80-89	8	Ascedens	3	0	0	0	II	35.99	37.27	36.55	36.6033	33.82	34.72	34.6	34.38	32.47	32.05	32.11	32.21	29.57	29.81	29.62	29.6667	24.37	24.32	24.46	24.3833		K059R	37.63	36.88	35.81	36.7733	34.2	34.37	34.68	34.4167	30.44	30.61	29.98	30.3433	29.28	29.05	28.99	29.1067	23.68	23.85	24.28
K060T	60-69	8	Ascedens	3	1	0	0	III	35.35	36.11	35.32	35.5933	34.99	33.76	35.36	34.7033	32.61	33.36	33.02	32.9967	30.84	30.65	30.37	30.62	22.71	22.82	23.25	22.9267		K060R	39.73	35.59	36.01	37.11	34.99	34.27	34.61	34.6233	29.73	30.06	30.31	30.0333	28.73	27.87	29.94	28.8467	22.77	22.87	23.28
K061T	80-89	8	Ascedens	3	0	0	1	II	36.63	37.05	37.95	37.21	34.51	35.26	34.69	34.82	32.88	33.34	33.34	33.1867	31.21	31.32	31.14	31.2233	23.62	23.79	24.08	23.83		K061R	37.29	38.88	38.25	38.14	34.99	34.7	35.28	34.99	32.19	32.5	32.35	32.3467	30.69	30.54	30.7	30.6433	23.94	23.89	24.4
K062T	70-79	8	Sigmoideum	3	0	0	0	II	40	39.53	38.91	39.48	35.47	35.35	35.09	35.3033	35.92	34.99	35.44	35.45	32.71	32.9	32.82	32.81	23.8	23.88	23.99	23.89		K062R	37.89	37.59	37.88	37.7867	35.06	34.77	3463	1177.61	33.45	34.05	33.13	33.5433	31.42	31.47	31.32	31.4033	23.54	23.58	23.95
K063T	70-79	9	Sigmoideum	3	1	0	-	III	36.9	38.08	37.21	37.3967	36.26	34.74	34.58	35.1933	31.96	31.48	31.43	31.6233	32.15	32.12	31.65	31.9733	23.01	23.39	23.38	23.26
K064T	40-49	9	Sigmoideum	3	2	0	1	III	40	39.94	39.17	39.7033	34.02	34.1	34.42	34.18	35.47	34.9	35.19	35.1867	32.621	32.31	32.4	32.4437	22.96	22.97	23.22	23.05
K065T	80-89	9	Caecum	4	2	0	0	III	36.03	36.8	37.12	36.65	34.23	33.68	33.36	33.7567	35.8	31.92	33.9	33.8733	29.6	29.86	29.35	29.6033	21.94	22.25	22.08	22.09		K065R	36.62	35.63	36.63	36.2933	33.09	33.2	33.1	33.13	30.05	29.85	30.22	30.04	26.84	26.8	26.84	26.8267	23.08	23.43	23.33
K066T	60-69	9	Sigmoideum	3	0	X	0	II	40	37.13	40	39.0433	34.35	33.74	33.97	34.02	33.3	32.64	33.24	33.06	32.71	32.41	32.38	32.5	23.5	23.54	23.82	23.62
K067T	80-89	9	Ascedens	3	0	X	0	II	39.02	38.96	38.09	38.69	34.48	33.97	33.41	33.9533	33.13	32.66	33.12	32.97	30.94	30.58	30.29	30.6033	22.73	22.88	23.28	22.9633		K067R	37.46	36.96	38.59	37.67	33.25	32.94	32.91	33.0333	27.98	28.26	28.4	28.2133	25.95	26.18	25.99	26.04	22.9	22.87	23.27
K068T	80-89	9	Caecum	3	0	X	0	II	37.25	38.76	37.2	37.7367	33.44	32.68	32.94	33.02	29.17	29.33	29.39	29.2967	30.49	29.79	29.8	30.0267	22.13	22.43	22.46	22.34		K068R	36.69	35.47	37.82	36.66	32.61	33.15	32.61	32.79	27.79	27.82	28	27.87	30.73	30.71	30.8	30.7467	22.9	23.03	23.43
K069T	60-69	9	Caecum	3	0	1	0	IV	38.7	39.75	37.69	38.7133	34.35	33.91	33.39	33.8833	31.96	31.83	32.31	32.0333	30.2	30.76	30.46	30.4733	22.58	22.56	22.87	22.67		K069R	37.01	36.31	38.38	37.2333	33.15	33.58	33.3	33.3433	29.95	30.38	30.15	30.16	29.44	29.42	29.53	29.4633	22.84	22.63	23.12
K070T	60-69	9	Sigmoideum	3	0	1	0	IV	38.51	36.72	37.38	37.5367	31.85	31.6	31.44	31.63	33.83	32.81	33.49	33.3767	31.73	31.44	31.3	31.49	25.04	25.06	25.51	25.2033		K070R	38.65	38.06	37.68	38.13	32.87	33.17	33.77	33.27	30.32	30.06	30.1	30.16	31.13	31.26	31.29	31.2267	23.63	23.85	23.99
K071T	70-79	9	Left colon flexur	3	0	X	0	II	38.64	37.5	36.45	37.53	31.55	31.77	31.96	31.76	30.18	29.96	30.1	30.08	29.25	29.15	29.1	29.1667	26.57	26.87	26.74	26.7267		K071R	38.31	36.97	38.5	37.9267	30.47	30.93	30.62	30.6733	30.55	30.88	30.02	30.4833	31.86	32.23	31.89	31.9933	28.32	28.71	28.58
K072T	60-69	9	Ascedens	2	0	X	0	I	35.49	35.82	35.87	35.7267	33.18	32.8	33.73	33.2367	28.43	28.5	28.42	28.45	28.99	28.44	28.38	28.6033	22.84	23.03	23.18	23.0167		K072R	36.67	36.94	36.37	36.66	33.18	33.44	33.45	33.3567	30.79	30.36	30.67	30.6067	30.21	30.26	30.12	30.1967	23.08	23.29	23.72
K073T	70-79	9	Right colon flexur	3	0	X	0	II	39.05	40	37.68	38.91	33	32.74	33.01	32.9167	33.88	32.79	33.7	33.4567	34.12	34.32	34.13	34.19	26.95	27.19	27.35	27.1633		K073R	37.28	38.96	40	38.7467	32.02	31.73	32.81	32.1867	32.1	31.72	32.88	32.2333	32.69	32.75	32.73	32.7233	26.38	26.51	26.51
K074T	70-79	9	Caecum	3	2	X	1	III	37.58	37.73	39.19	38.1667	33.38	33.1	33.39	33.29	32.21	32.75	33.27	32.7433	30.73	30.84	30.59	30.72	23.24	23.26	23.46	23.32		K074R	36.86	36.36	36.95	36.7233	33.37	32.94	33.52	33.2767	31.25	30.86	31.11	31.0733	30.58	30.49	30.92	30.6633	23.33	23.61	23.7
K075T	70-79	9	Sigmoideum	3	0	X	0	II	40	39.39	37.41	38.9333	34.33	32.92	33.52	33.59	34.48	35.53	34.08	34.6967	32.25	31.99	32.7	32.3133	23.55	23.47	23.91	23.6433		K075R	36.51	36.59	37.8	36.9667	33.27	32.86	32.65	32.9267	28.88	29.09	29.24	29.07	29.39	29.15	29.18	29.24	22.92	22.98	23.28
K076T	50-59	9	Caecum	4	2	0	1	III	35.84	35.49	35.9	35.7433	33.79	34.05	32.97	33.6033	25.83	25.84	25.95	25.8733	30.78	30.04	30.29	30.37	23.08	23.1	23.35	23.1767		K076R	35.93	38.48	39.4	37.9367	33.79	34.1	34.12	34.0033	32.61	33.72	33.99	33.44	32.12	31.91	32.13	32.0533	23.88	23.99	24.57
K077T	>90	9	Ascedens	3	0	X	1	II	36.91	36.22	36.83	36.6533	33.51	33.29	33.4	33.4	29.38	29.95	29.77	29.7	31.06	31.34	31.56	31.32	24.43	24.59	24.79	24.6033		K077R	36.44	36.72	36.43	36.53	31.58	31.66	32.24	31.8267	30.6	30.24	30.37	30.4033	31.12	30.66	31.33	31.0367	24.86	24.85	25.27
K078T	70-79	9	Sigmoideum	3	1	0	0	III	40	35.58	40	38.5267	32.9	32.26	33.29	32.8167	29.19	29.9	29.78	29.6233	29.14	29.33	29.3	29.2567	23.28	23.24	23.72	23.4133		K078R	36.66	37.01	36.05	36.5733	32.83	32.97	33.77	33.19	29.91	30.13	30.23	30.09	29.13	29.19	28.96	29.0933	22.53	22.52	22.93
K079T	70-79	10	Caecum	4	1	1	?	III	35.66	36.64	37.68	36.66	32.71	32.36	31.97	32.3467	34	34.49	35.3	34.5967	30.96	31.14	31.21	31.1033	22.88	23.01	23.29	23.06		K079R	35.66	35.86	35.4	35.64	31.69	31.91	31.75	31.7833	30.78	30.84	31.1	30.9067	31.15	30.67	31.13	30.9833	22.97	22.93	23.34
K080T	60-69	10	Ascedens	3	0	X	0	II	36.86	36.15	40	37.67	31.93	31.23	31.94	31.7	31.42	31.27	31.66	31.45	31.65	31.58	31.76	31.6633	23.87	24.16	24.54	24.19		K080R	40	36.87	36.12	37.6633	32.84	33.05	33.19	33.0267	30.63	30.37	30.76	30.5867	31.14	31.75	31.17	31.3533	23.64	23.66	23.91
K081T	60-69	10	Sigmoideum	3	0	X	0	II	35.24	35.45	36.72	35.8033	32.05	32.05	31.75	31.95	26.34	26.27	26.21	26.2733	28.03	28.11	27.69	27.9433	23.39	23.21	23.68	23.4267
K082T	80-89	10	Sigmoideum	3	0	X	0	II	37.92	38.53	38.06	38.17	31.94	31.98	32	31.9733	32.87	33.07	33.35	33.0967	30.48	30.68	30.45	30.5367	23.77	23.78	23.97	23.84
K083T	60-69	10	Rectum	3	0	X	0	II	37.46	38.93	40	38.7967	34.3	32.8	32.82	33.3067	33	32.88	33.51	33.13	32.32	32.02	32.74	32.36	23.12	23.22	23.4	23.2467		K083R	33.95	33.51	34.63	34.03	29.99	30.24	30.03	30.0867	29.94	30.55	30.51	30.3333	30.58	29.97	29.83	30.1267	24.91	24.85	25.08
K084T	>90	10	Ascedens	3	1	X	0	III	36.93	36.42	37.17	36.84	33.53	32.02	32.61	32.72	26.65	26.73	26.8	26.7267	25.92	25.39	25.3	25.5367	22.8	22.6	22.86	22.7533		K084R	36.62	36.22	35.27	36.0367	32.78	33.21	33.39	33.1267	29.86	29.8	29.97	29.8767	30.01	30.45	30.65	30.37	23.66	23.67	24.2
K085T	80-89	10	Sigmoideum	3	0	X	0	II	40	37.26	39.82	39.0267	33.02	32.95	32.72	32.8967	35.21	34.88	35.46	35.1833	32.2	32.17	32.17	32.18	23.03	23.33	23.45	23.27		K085R	35.95	36.73	36.44	36.3733	32.99	33.29	32.92	33.0667	31.55	34.92	36.1	34.19	30.92	31.47	30.78	31.0567	23.47	23.37	23.92
K086T	70-79	10	Sigmoideum	2	0	X	0	I	35.36	36.51	37.11	36.3267	32.19	32	32.08	32.09	32.42	32.1	31.97	32.1633	30.91	30.94	30.85	30.9	23.16	23.25	23.37	23.26		K086R	39.36	40	37.38	38.9133	31.87	32.27	32.09	32.0767	32.41	32.89	32.81	32.7033	33.26	34.11	33.21	33.5267	26.33	26.2	26.61
K087T	70-79	10	Sigmoideum	3	1	X	?	III	40	39.44	40	39.8133	33.03	32.45	32.04	32.5067	33.49	35.36	34.36	34.4033	34.1	33.9	33.53	33.8433	25.12	25.44	25.74	25.4333		K087R	37.59	37.23	38.24	37.6867	31.23	31.34	30.45	31.0067	30.26	30.33	30.29	30.2933	29.93	29.43	29.41	29.59	25.54	25.69	25.86
K088T	60-69	10	Caecum	3	0	X	?	II	35.52	35.51	36.12	35.7167	31.89	31.87	31.98	31.9133	25.13	25	24.96	25.03	25.79	26.14	25.91	25.9467	22.9	23.2	23.56	23.22		K088R	37.4	36.93	36.02	36.7833	32.43	32.01	32.46	32.3	26.24	26.14	26.13	26.17	25.89	25.76	25.71	25.7867	23.641	23.78	23.9
K089T	60-69	10	Ascedens	3	1	0	0	III	38.84	37.96	36.5	37.7667	32.44	32.28	31.8	32.1733	33.04	32.9	32.99	32.9767	31.67	31.96	31.39	31.6733	22.56	22.37	22.55	22.4933		K089R	36.57	38.02	36.1	36.8967	32.19	32.53	32.74	32.4867	31.84	31.37	32.32	31.8433	31.94	31.82	31.9	31.8867	23.45	23.37	23.73
K090T	80-89	10	Ascedens	3	2	X	0	III	36.15	38.18	36.15	36.8267	33.8	31.86	31.66	32.44	32.88	32.64	32	32.5067	29.56	29.74	29.42	29.5733	24.1	24.03	24.37	24.1667		K090R	39.08	36.67	37.96	37.9033	32.41	32.58	32.39	32.46	31.32	31.71	32.17	31.7333	28.45	28.5	28.55	28.5	24.45	24.42	24.69
K091T	70-79	10	Ascedens	3	0	X	0	II	36.33	36.96	35.77	36.3533	33.07	32.57	32.62	32.7533	29	29.22	28.82	29.0133	29.69	28.75	28.87	29.1033	23.17	22.98	23.24	23.13		K091R	36.9	36.84	36.09	36.61	32.31	32.66	33.08	32.6833	29.16	29.57	40	29.365	29.64	29.44	29.27	29.45	23.18	22.96	23.69
K092T	70-79	10	Ascedens	3	0	X	0	II	39.13	36.88	36.51	37.5067	32.74	32.42	32.42	32.5267	35.36	35.75	36.83	35.98	33.54	33.69	32.98	33.4033	23.5	23.4	23.98	23.6267		K092R	38.15	36.5	36.8	37.15	33	32.76	33.13	32.9633	36.08	36.14	35.73	35.9833	32.23	32.26	31.9	32.13	23.79	23.74	24.1
K093T	>90	10	Caecum	3	1	X	0	III	38.51	36.92	36.58	37.3367	32.09	32.12	32.05	32.0867	32.92	33.45	33.92	33.43	29.59	29.72	29.4	29.57	23.96	23.93	24.31	24.0667		K093R	37.55	36.72	36.42	36.8967	31.76	32.78	32.01	32.1833	29.07	29.24	29.35	29.22	24.91	25.15	24.91	24.99	23.88	23.89	24.37
K094T	60-69	10	Left colon flexur	3	1	X	0	III	38.49	37.54	37.67	37.9	31.17	31.13	30.9	31.0667	28.38	28.31	28.23	28.3067	27.84	27.73	27.85	27.8067	26.99	27.14	27.39	27.1733		K094R	37.7	40	40	39.2333	31.56	31.59	32.31	31.82	31.14	31.33	31.32	31.2633	30.21	30.03	30.42	30.22	26.77	26.93	27.24
K095T	60-69	10	Sigmoideum	2	0	X	0	I	36.36	36.46	36.76	36.5267	30.48	30.18	30.06	30.24	30.83	30.83	31.22	30.96	30.93	30	30.34	30.4233	25.2	25.27	25.56	25.3433		K095R	38.04	40	37.63	38.5567	31.42	31.02	31.24	31.2267	29.2	29.25	29.36	29.27	27.93	27.72	27.64	27.7633	24.91	25.01	25.76
K096T	70-79	10	Caecum	4	2	X	0	III	37.06	37.15	36.39	36.8667	31	31.15	30.58	30.91	35.54	36.31	35.75	35.8667	31.01	31.03	30.99	31.01	23.05	23.19	23.29	23.1767		K096R	36.05	35.72	35.76	35.8433	31.73	31.94	32.12	31.93	32.55	32.27	32.44	32.42	31.38	30.82	30.68	30.96	22.97	23.06	23.16
K097T	60-69	10	Rectum	3	1	X	0	III	37.48	36.37	35.16	36.3367	32.45	32.02	31.77	32.08	29.28	29.38	29.41	29.3567	29.88	29.93	29.96	29.9233	22.41	22.28	22.6	22.43
K098T	50-59	10	Sigmoideum	3	1	X	0	III	36.91	36.96	35.82	36.5633	31.24	30.66	31.08	30.9933	32.51	33.2	32.39	32.7	31.11	31.04	31.12	31.09	24.8	24.84	25.06	24.9		K098R	40	38.69	36.49	38.3933	30.72	30.74	30.97	30.81	31.93	31.39	31.5	31.6067	32.29	32.31	32.744	32.448	27.75	28.8	28.07
K099T	70-79	10	Left colon flexur	3	1	X	1	III	36.54	35.62	35.89	36.0167	30.67	30.72	30.76	30.7167	28.2	28.25	28.31	28.2533	28.81	27.97	27.88	28.22	24.6	24.56	24.91	24.69
[truncated: 4 more columns]

## Sheet: Adenoma
Positive
Negative
Negative. Ct are below thresshold, but the melting curve reveal that signal are unspecific
						S. gallolyticus spp.				S. gallolyticus subsp. gallolyticus				F. nucleatum				B. fragilis				B-actin				five year follow up (months following diagnosis)
Sample ID	Age group	Sample age (years)	Adenoma type	Degree of dysplasia	Lokation	Ct 1	Ct 2	Ct 3	Mean	Ct 1	Ct 2	Ct 3	Mean	Ct 1	Ct 2	Ct 3	Mean	Ct 1	Ct 2	Ct 3	Mean	Ct 1	Ct 2	Ct 3	Mean	Adenom	CRC	Death
P001	60-69	5	Tubular	Severe	Caecum	33.26	33.13	33.8	33.3967	31.77	31.32	31.16	31.4167	33.38	32.82	33.32	33.1733	28.34	28.28	28.31	28.31	21.21	21.25	21.24	21.2333	-	-	3
P002	60-69	5	Tubular	Severe	Sigmoideum	36.76	38.17	39.63	38.1867	32.45	32.49	32.55	32.4967	34.68	35.6	36.51	35.5967	31.67	31.76	32.21	31.88	22.46	22.6	22.64	22.5667	3	-	-
P003	80-89	5	Tubular	Moderate	Sigmoideum	38.26	38.74	37.68	38.2267	32.62	32.11	31.8	32.1767	37.64	36.02	36.89	36.85	32.79	32.69	32.28	32.5867	23.12	23.16	22.85	23.0433	-	-	-
P004	70-79	5	Tubular	Severe	Right colon	35.67	36.2	36.71	36.1933	32.22	32.29	32.53	32.3467	28.8	28.58	28.72	28.7	30.84	31.42	31.07	31.11	23.74	23.98	23.97	23.8967	-	-	-
P005	60-69	5	Tubular	Moderate	Sigmoideum	35.45	34.89	34.99	35.11	31.41	30.82	30.93	31.0533	35.08	34.15	35.08	34.77	31.45	30.72	30.74	30.97	23.22	23.4	23.46	23.36	-	-	-
P006	40-49	5	Tubular	Moderate	Caecum	38.16	36.89	38.62	37.89	32.7	32.245	32.22	32.3883	37.06	37.66	35.05	36.59	33.14	32.87	33.89	33.3	23.9	24.13	24.74	24.2567	44	-	-
P007	60-69	5	Tubular	Severe	Caecum	35.49	35.94	36.15	35.86	31.61	31.72	31.15	31.4933	28.69	28.53	28.56	28.5933	27.99	28.05	27.94	27.9933	22.44	22.41	22.57	22.4733	-	-	-
P008	60-69	6	Tubular	Severe	Sigmoideum	38.11	38.74	38.76	38.5367	32.32	32.12	32.1	32.18	36.38	36.64	40	37.6733	32.75	32.23	32.48	32.4867	22.34	22.56	22.85	22.5833	-	-	-
P009	60-69	6	Tubular	Mild	Left colon	35.32	35.43	38.94	36.5633	32.4	31.77	31.45	31.8733	30.45	29.88	34.78	31.7033	30.06	29.66	36.57	32.0967	23.05	22.77	39.22	22.91	3	16	18
P010	70-79	6	Tubular	Severe	Transversum	35.83	34.86	35.71	35.4667	29.56	29.61	29.69	29.62	31.4	31.75	31.96	31.7033	30.15	30.35	30.4	30.3	24.57	24.57	24.7	24.6133	-	-	-
P011	50-59	6	Tubular	Mild	Sigmoideum	35.96	35.95	39.57	37.16	31.81	31.4	31.49	31.5667	32.42	32.76	32.26	32.48	30.85	30.06	30.69	30.5333	23.92	24	23.92	23.9467	-	-	-
P012	60-69	6	Tubular	Severe	Sigmoideum	38.68	37.49	39.34	38.5033	32.02	32.27	32.8	32.3633	34.74	35.16	35.7	35.2	33.42	33.44	35.12	33.9933	24.1	24.41	24.77	24.4267	-	-	-
P013	80-89	6	Tubular	Moderate	Sigmoideum	37.54	37.48	38.32	37.78	30.54	30.59	30.84	30.6567	32.47	31.76	31.93	32.0533	29.96	30.43	30.32	30.2367	23.19	23.25	23.34	23.26	-	-	-
P014	80-89	7	Tubular	Severe	Sigmoideum	40	40	40	40	32.82	32.44	32.1	32.4533	33.88	33.67	33.95	33.8333	34.16	33.51	33.7	33.79	23.92	23.98	24.39	24.0967	-	-	-
P015	60-69	7	Tubular	Severe	Sigmoideum	37.88	40	38.06	38.6467	32.04	31.92	31.89	31.95	33.94	33.86	35.91	34.57	34.15	33.38	33.44	33.6567	23.98	23.9	24.08	23.9867	-	-	-
P016	60-69	7	Tubular	Moderate	Sigmoideum	37.08	37.72	37.23	37.3433	31.18	31.01	31.75	31.3133	31.98	32.19	32.25	32.14	31.06	30.98	31.54	31.1933	22.5	22.48	22.83	22.6033	-	0	-
P017	70-79	7	Villous	Severe	Caecum	38.7	37.3	37.53	37.8433	30.89	30.48	30.41	30.5933	30.17	30.31	30.35	30.2767	31.61	31.55	31.34	31.5	26.64	26.7	26.81	26.7167	-	-	-
P018	70-79	7	Tubular	Moderate	Sigmoideum	37.78	37.64	37.72	37.7133	30.33	30.21	30.58	30.3733	32.67	33.19	32.95	32.9367	32.78	32.8	32.97	32.85	27.74	27.76	28.5	28	-	-	-
P019	70-79	8	Tubular	Moderate	Caecum	37.02	37.1	37.68	37.2667	31.85	31.63	31.3	31.5933	30.8	31.24	30.82	30.9533	30.28	30.37	30.13	30.26	23.31	23.44	23.45	23.4	-	-	-
P020	60-69	8	Tubulovillous	Moderate	Sigmoideum	38.15	37.95	37.88	37.9933	31.95	31.42	31.8	31.7233	35.75	35.78	36.84	36.1233	33.04	32.96	33.12	33.04	22.2	22.44	22.58	22.4067	-	-	-
P021	70-79	8	Tubular	Moderate	Sigmoideum	40	40	39.76	39.92	32.22	32.27	31.62	32.0367	36.64	34.35	34.21	35.0667	35.14	34.63	34.4	34.7233	24.59	23.93	24.2	24.24	-	-	-
P022	70-79	8	Tubular	Moderate	Descendens	39.53	38.93	39.89	39.45	32.02	32.66	32.42	32.3667	33.96	34.11	34.37	34.1467	33.59	33.87	33.99	33.8167	23.7	23.44	23.56	23.5667	4	-	-
P023	60-69	8	Tubular	Severe	Sigmoideum	38.77	37.9	39.45	38.7067	31.01	30.88	30.77	30.8867	35.32	34.37	34.69	34.7933	34.42	33.78	33.61	33.9367	25.96	26.09	26.09	26.0467	3	-	-
P024	70-79	8	Tubular	Moderate	Sigmoideum	36.86	40	38.33	38.3967	30.47	30.36	30.43	30.42	34.71	35.44	34.93	35.0267	32.64	33.21	32.22	32.69	26.31	26.22	26.3	26.2767	-	-	31
P025	60-69	8	Tubular	Severe	Descendens	40	40	40	40	32.39	31.57	31.81	31.9233	34.57	35.02	34.98	34.8567	31.88	32.46	32.53	32.29	22.55	22.763	22.8	22.7043	-	-	-
P026	60-69	8	Tubulovillous	Moderate	Rectum	40	38.18	38.42	38.8667	31.89	31.87	32.26	32.0067	37.85	38.19	40	38.68	34.3	38.53	33.26	35.3633	23.99	23.64	23.53	23.72	3	-	-
P027	50-59	8	Tubular	Moderate	Sigmoideum	38.82	40	40	39.6067	32.89	32.5	32.55	32.6467	32.68	32.32	31.84	32.28	32.68	32.76	32.87	32.77	23.44	23.22	23.52	23.3933	-	-	-
P028	70-79	8	Tubular	Severe	Sigmoideum	38.92	39.19	37.42	38.51	32.58	32.46	32.87	32.6367	34.92	35.31	33.94	34.7233	33.73	32.67	32.69	33.03	23.38	23.31	23.21	23.3	-	-	-
P029	50-59	8	Tubular	Severe	Sigmoideum	37.32	37.49	39.67	38.16	33.61	33	32.62	33.0767	37.1	36.51	37.56	37.0567	32.91	32.99	33.23	33.0433	23.32	23.2	23.55	23.3567	-	-	-
P030	50-59	9	Tubular	Mild	Sigmoideum	37.54	36.41	36.84	36.93	31.71	31.73	31.69	31.71	30.58	30.98	30.63	30.73	28.93	28.65	28.74	28.7733	23.32	23.66	23.5	23.4933	-	-	-
P031	50-59	9	Tubular	Mild	Sigmoideum	35.08	36.87	35.42	35.79	29.51	29.27	29.08	29.2867	31.86	31.73	32.62	32.07	31.25	30.85	31.93	31.3433	24.79	24.79	24.92	24.8333	-	-	-
P032	60-69	9	Tubulovillous	Moderate	Rectum	39.18	39.32	37.44	38.6467	32.57	32.22	32.33	32.3733	36.4	37.71	38.69	37.6	33.23	33.34	33.19	33.2533	23.15	22.76	23.13	23.0133	3	-	-
P033	80-89	9	Tubular	Moderate	Caecum	37.16	37.17	36.87	37.0667	32.77	32.06	31.84	32.2233	31.28	32.39	31.95	31.8733	30.51	30.68	31.17	30.7867	23.88	23.76	23.98	23.8733	-	-	4
P034	50-59	9	Tubular	Moderate	Sigmoideum	36.84	37.84	36.11	36.93	31	30.84	30.71	30.85	34.11	35.09	34.64	34.6133	33.96	33.7	35.09	34.25	27.43	27.12	24.08	26.21	-	-	-
P035	40-49	9	Tubular	Moderate	Left colon flexur	37.81	39.37	38.24	38.4733	32.33	32.5	32.32	32.3833	38.22	38.18	38.23	38.21	34.16	34.64	34.94	34.58	24.08	23.9	25.35	24.4433	40	-	-
P036	50-59	9	Tubulovillous	Moderate	Sigmoideum	40	40	40	40	32.35	32.49	32.26	32.3667	38.18	37.05	36.42	37.2167	32.02	32.42	31.85	32.0967	22.99	23.21	23.06	23.0867	-	-	-
P037	80-89	9	Tubular	Moderate	Not assigned	40	40	40	40	32.01	31.12	31.38	31.5033	36.33	34.84	39.3	36.8233	34.13	33.87	34.71	34.2367	25.99	25.97	26.44	26.1333	-	-	13
P038	60-69	9	Tubular	Mild	Caecum	38.11	38.12	40	38.7433	31.94	32.09	32.56	32.1967	34.78	33.23	24.26	30.7567	32.85	32.87	32.38	32.7	23.73	23.26	24.1	23.6967	-	-	-
P039	40-49	9	Tubular	Moderate	Sigmoideum	35.81	37.23	37.96	37	28.61	27.85	28.12	28.1933	30.21	30.4	30.43	30.3467	33.12	32.98	33.58	33.2267	32.57	32.77	32.36	32.5667	-	1	30
P040	70-79	9	Tubular	Moderate	Right colon flexur	37.27	37.31	37.22	37.2667	31.77	31.57	32.18	31.84	32.09	32.01	31.75	31.95	31.35	30.64	30.54	30.8433	23.58	23.11	23.07	23.2533	-	-	-
P041	60-69	9	Tubular	Severe	Sigmoideum	37.44	39.41	36.92	37.9233	31.96	31.74	31.66	31.7867	33.43	32.38	33.33	33.0467	39.47	33.69	33.72	35.6267	26.13	26.18	26.67	26.3267	-	43	-
P042	40-49	9	Tubular	Severe	Sigmoideum	40	38.99	40	39.6633	32.18	32.78	33.26	32.74	40	37.17	40	39.0567	35.79	34.64	64.52	44.9833	27.57	27.73	27.57	27.6233	7	-	-
P043	50-59	9	Tubular	Moderate	Sigmoideum	37.21	37.36	38.24	37.6033	32.71	32.79	32.61	32.7033	32.79	32.68	34	33.1567	31.26	31.5	31.57	31.4433	23.26	23.52	23.63	23.47	-	-	-
P045	50-59	9	Tubular	Severe	Sigmoideum	34.29	33.84	37.05	35.06	30.89	30.5	30.4	30.5967	31.75	31.98	31.6	31.7767	30.57	30.76	30.94	30.7567	25.3	25.31	25.34	25.3167	2	44	-
P046	50-59	10	Tubular	Moderate	Descendens	40	38.99	36.09	38.36	32.46	32.75	33.31	32.84	36.54	35.75	36.47	36.2533	33.97	32.77	33.15	33.2967	23.25	23.23	23.34	23.2733	-	-	-
P047	70-79	10	Tubular	Moderate	Caecum	38.5	37.53	37.8	37.9433	30.59	29.94	30.46	30.33	31.02	31.3	30.57	30.9633	32.12	32.61	32.23	32.32	27.4	27.35	27.24	27.33	-	-	-
P048	80-89	10	Tubular	Severe	Sigmoideum	39.09	38.28	40	39.1233	33.18	32.83	32.69	32.9	36.17	38.26	36.39	36.94	32.97	32.87	33.18	33.0067	22.8	22.85	23.23	22.96	-	-	-
P049	70-79	10	Tubular	Severe	Caecum	36.99	39.53	37.25	37.9233	31.77	31.92	31.49	31.7267	31.2	32.06	31.22	31.4933	33.1	32.77	32.97	32.9467	27.07	26.71	26.87	26.8833	-	-	-
P050	70-79	10	Tubular	Severe	Not assigned	37.66	36.53	36.57	36.92	32.22	31.91	32.37	32.1667	30.33	30.52	30.8	30.55	31.42	31.7	31.69	31.6033	25.27	25.21	25.36	25.28	9	-	-
P051	60-69	10	Tubular	Moderate	Sigmoideum	36.14	36.43	37.01	36.5267	33.19	32.55	32.68	32.8067	34.7	33.95	35.89	34.8467	32.71	31.72	32.16	32.1967	22.99	22.9	22.79	22.8933	-	-	-
P052	70-79	10	Tubular	Moderate	Sigmoideum	40	39.47	40	39.8233	30.67	30.3	30.17	30.38	36.07	35.45	40	37.1733	33.88	33.88	33.25	33.67	24.08	23.9	24.55	24.1767	-	-	-
P054	>90	10	Tubular	Moderate	Sigmoideum	36.22	36.98	37.81	37.0033	30.69	30.79	31.09	30.8567	31.98	31.94	32.39	32.1033	31.38	31.35	31.71	31.48	25.04	25.03	25.3	25.1233	-	-	0
P055	50-59	10	Tubular	Severe	Sigmoideum	38.01	37.41	36.95	37.4567	35.75	32.93	33.17	33.95	33.46	32.92	32.88	33.0867	32.25	31.48	31.64	31.79	24.38	34.39	24.36	27.71	-	-	-
P056	80-89	10	Tubular	Moderate	Ascendens	37.02	40	40	39.0067	30.93	30.79	31.39	31.0367	32.08	32.21	33.09	32.46	33.17	33.76	33.51	33.48	27.4	27.22	27.65	27.4233	-	-	-
P057	80-89	10	Tubular	Mild	Sigmoideum	39.37	37.2	38	38.19	32.92	32.64	32.29	32.6167	29.67	30.12	30.1	29.9633	33.52	32.39	32.47	32.7933	24.85	25.07	24.98	24.9667	-	-	0
P058	70-79	10	Tubular	Mild	Sigmoideum	34.89	34.13	35.12	34.7133	29.46	29.54	29.53	29.51	31.75	31.98	32.07	31.9333	31.28	31.22	31.73	31.41	25.8	26.01	26.48	26.0967	-	-	-
P059	60-69	10	Tubular	Moderate	Sigmoideum	38.2	38.09	37.7	37.9967	31.61	31.58	31.41	31.5333	33.89	33.24	33.28	33.47	32.47	32.47	32.67	32.5367	24.09	24	23.99	24.0267	-	-	-
P060	70-79	10	Tubular	Severe	Sigmoideum	38.28	36.63	37.99	37.6333	30.66	30.65	31.5	30.9367	31.87	32.67	33.01	32.5167	31.72	31.66	32.05	31.81	24.88	24.84	25.2	24.9733	3	-	-
P061	60-69	10	Tubular	Mild	Caecum	40	39.71	37.44	39.05	32.7	32.09	32.32	32.37	30.94	30.93	30.36	30.7433	31.54	30.96	30.61	31.0367	24.69	24.55	24.44	24.56	-	-	-
P063	80-89	11	Tubulovillous	Moderate	Sigmoideum	40	40	38.48	39.4933	32.84	32.89	32.61		34.23	34.01	33.96	34.0667	24.62	33.49	34.16	30.7567	23.55	23.8	23.56	23.6367	-	-	27
P064	70-79	11	Tubular	Moderate	Sigmoideum	40	40	39.8	39.9333	32.98	32.95	33.19	33.04	36.13	34.9	36.18	35.7367	31.74	31.19	31.79	31.5733	23.82	23.55	23.89	23.7533	-	-	-
P065	80-89	11	Tubular	Severe	Sigmoideum	40	39.55	39.68	39.7433	32.64	32.34	32.13	32.37	35.39	35.81	38.07	36.4233	33.64	33.36	33.16	33.3867	22.89	22.81	22.76	22.82	5	-	-
P066	50-59	11	Tubular	Severe	Sigmoideum	35.39	35.69	36.64	35.9067	30.62	30.62	30.88	30.7067	30.46	30.74	30.97	30.7233	29.16	28.92	29.51	29.1967	23.33	23.57	23.6	23.5	-	-	-
P067	50-59	11	Tubular	Moderate	Sigmoideum	38.19	40	38.65	38.9467	31.47	31.21	30.88	31.1867	35.6	34.27	34.68	34.85	34.54	33.86	33.8	34.0667	26.37	26.02	26.12	26.17	-	-	-
P068	80-89	11	Tubular	Moderate	Sigmoideum	38.07	36.6	38.59	37.7533	32.07	31.87	31.66	31.8667	36.05	37.72	35.82	36.53	32.16	32.26	32.37	32.2633	22.97	22.84	23.08	22.9633	-	-	13
P069	50-59	11	Tubular	Severe	Sigmoideum	39	36.86	37.85	37.9033	31.57	31.5	31.7	31.59	32.79	32.95	32.52	32.7533	33.11	31.84	31.63	32.1933	22.94	23.26	23.15	23.1167	-	-	-
P070	40-49	11	Tubular	Moderate	Sigmoideum	38.56	40	39.91	39.49	31.59	31.59	32.17	31.7833	32.03	31.79	32.14	31.9867	31.16	31.56	30.96	31.2267	22.95	23.29	22.95	23.0633	3	-	-
P071	70-79	11	Tubular	Moderate	Sigmoideum	39.65	38.83	38.66	39.0467	31.45	30.87	30.62	30.98	35.15	34.81	35.58	35.18	33.7	34.36	34.57	34.21	23.9	24.06	24.24	24.0667	-	-	-
P072	<40	11	Tubular	Severe	Sigmoideum	40	40	40	40	31.3	31.16	31.48	31.3133	33.42	33.19	32.46	33.0233	34.4	33.77	33.32	33.83	24.25	23.91	24.09	24.0833	12	-	-
P073	70-79	11	Tubular	Moderate	Sigmoideum	37.35	35.49	37.52	36.7867	29.5	29.28	29.21	29.33	31.75	32.22	32.36	32.11	31.34	31.46	31.8	31.5333	27.09	26.9	26.92	26.97	-	-	36
P074	60-69	11	Tubular	Severe	Descendens	38.79	38	38.79	38.5267	29.58	29.81	30.03	29.8067	36.96	34.8	34.97	35.5767	34.52	33.68	33.74	33.98	27.01	26.84	26.79	26.88	7	-	-
P075	70-79	11	Tubular	Severe	Sigmoideum	38.2	40	39.69	39.2967	31.26	31.24	30.89	31.13	37.78	36.77	40	38.1833	33.82	34.66	35.14	34.54	23.35	23.52	23.66	23.51	-	-	-
P076	80-89	11	Tubular	Mild	Sigmoideum	35.53	35.67	35.1	35.4333	29.18	29.05	29.19	29.14	31.33	31.08	30.46	30.9567	29.66	29.4	29.17	29.41	23.01	23.4	23.08	23.1633	1	-	34
P077	60-69	11	Tubular	Moderate	Sigmoideum	40	37.07	38.97	38.68	30.94	31.35	30.72	31.0033	34.33	34.78	34.75	34.62	32.74	32.86	33.33	32.9767	23.15	23.12	23.53	23.2667	-	-	-
P078	50-59	11	Tubular	Moderate	Sigmoideum	40	40	40	40	31.8	31.69	31.98	31.8233	37.75	35.8	38.51	37.3533	35.15	34.88	34.57	34.8667	24.64	24.35	24.36	24.45	43	-	-
P079	80-89	11	Tubular	Severe	Not assigned	39.35	38.89	38.71	38.9833	31.85	31.47	31.36	31.56	33.29	34.83	33.95	34.0233	32.22	32.45	32.76	32.4767	23.98	23.91	23.96	23.95	-	-	-
P080	50-59	11	Tubular	Moderate	Sigmoideum	39.38	40	40	39.7933	31.14	31.14	31.34	31.2067	34.34	35.87	34.56	34.9233	34.59	33.74	33.88	34.07	23.55	23.91	23.58	23.68	0	-	-
P081	70-79	11	Tubular	Moderate	Descendens	35.58	37.3	37.85	36.91	31.12	30.67	30.62	30.8033	32.9	33.03	32.99	32.9733	31.97	31.5	31.67	31.7133	24.04	23.89	24.23	24.0533	-	-	-
P082	50-59	11	Tubulovillous	Mild	Sigmoideum	40	38.24	38.45	38.8967	30.39	30.59	30.67	30.55	36.76	36.56	35.42	36.2467	32.66	32.69	32.37	32.5733	22.93	23.02	22.98	22.9767	36	-	-
P083	80-89	11	Tubular	Moderate	Sigmoideum	40	40	40	40	32.47	32.42	32.69	32.5267	34.46	34.14	34.42	34.34	32.7	32.77	33.478	32.9827	23.99	24.37	24.29	24.2167	-	-	12
P084	60-69	11	Tubular	Moderate	Sigmoideum	39.8	38.78	38.92	39.1667	32.08	32.07	32.78	32.31	34.96	34.85	35.15	34.9867	33.4	32.99	32.68	33.0233	23.3	23.28	22.75	23.11	-	-	-
P085	60-69	11	Tubular	Moderate	Sigmoideum	40	40	39.12	39.7067	32.37	32	31.88	32.0833	36.82	36.22	39.94	37.66	34.74	34.4	34.67	34.6033	24.1	24.24	24.32	24.22	-	-	-
P086	60-69	12	Tubular	Moderate	Sigmoideum	40	38.05	40	39.35	32.04	31.78	31.96	31.9267	37.6	36.51	36.3	36.8033	35.28	34.17	34.4	34.6167	24.19	24.34	24.9	24.4767	40	-	-
P087	60-69	12	Tubular	Moderate	Sigmoideum	40	39.29	40	39.7633	31.87	31.73	31.59	31.73	37.37	38.74	40	38.7033	34.39	35.62	35.43	35.1467	24.65	24.96	25.37	24.9933	5	-	-
P088	70-79	12	Tubular	Moderate	Caecum	40	39.87	36.98	38.95	31.14	31.5	31.36	31.3333	33.44	32.86	33.09	33.13	30.79	30.78	30.83	30.8	23.72	23.74	23.61	23.69	-	-	-
P089	70-79	12	Tubular	Moderate	Sigmoideum	38.46	40	39.56	39.34	31.87	31.26	31.5	31.5433	34.85	35.24	35.84	35.31	32.71	32.29	31.81	32.27	23.31	22.86	22.98	23.05	-	-	-
P090	60-69	12	Tubular	Moderate	Sigmoideum	39.6	39.98	40	39.86	31.38	31.47	31.08	31.31	39.12	38.19	37.6	38.3033	33.71	33.56	33.45	33.5733	23.73	23.69	24.18	23.8667	-	-	-
P091	60-69	12	Tubular	Moderate	Sigmoideum	33.93	34.09	33.76	33.9267	-	-	-	-	33.39	33.35	34.03	33.59	32.02	32.17	32.52	32.2367	26.64	26.51	26.35	26.5	-	-	-
P092	70-79	12	Tubular	Moderate	Ascendens	36.04	37.56	35.96	36.52	-	-	-	-	32.26	32.59	32.03	32.2933	31.59	31.09	31.21	31.2967	27.77	27.77	27.54	27.6933	41	-	-
P093	50-59	12	Tubular	Moderate	Sigmoideum	40	40	40	40	31.57	31.73	30.98	31.4267	38.63	39.25	38.4	38.76	34.37	34.43	34.71	34.5033	23.45	23.53	23.48	23.4867	-	-	-
P094	60-69	13	Tubular	Moderate	Descendens	39.66	40	40	39.8867	31.29	31.1	31.48	31.29	32.4	32.75	33.41	32.8533	32.22	32.18	32.48	32.2933	23.6	23.7	23.95	23.75	3	-	-
P095	60-69	13	Tubular	Moderate	Sigmoideum	39	37.09	40	38.6967	32.34	31.53	31.41	31.76	35.51	35.7	36.97	36.06	34.22	33.93	33.81	33.9867	23.67	23.57	23.46	23.5667	-	-	-
P096	70-79	13	Tubular	Severe	Rectum	40	40	40	40	30.73	30.76	30.91	30.8	34.71	34.93	35.23	34.9567	31.94	31.94	32.57	32.15	24.62	24.53	24.92	24.69	3	-	-
P097	40-49	13	Tubular	Moderate	Sigmoideum	36.59	37.1	36.41	36.7	30.7	30.11	30.16	30.3233	33.64	33.68	33.83	33.7167	32.08	31.5	31.66	31.7467	24.25	24.15	24.17	24.19	-	-	-
P098	80-89	13	Tubular	Mild	Sigmoideum	35.49	35.38	35.88	35.5833	-	-	-	-	30.09	30.04	30.67	30.2667	30.58	30.38	31	30.6533	24.52	24.63	25.13	24.76	-	-	-
P099	60-69	13	Tubular	Moderate	Sigmoideum	37.7	39.39	40	39.03	29.67	29.65	29.21	29.51	32.58	34.05	33.17	33.2667	30	29.7	29.39	29.6967	24.79	24.93	24.89	24.87	-	-	-

## Sheet: Diverticula
Positive
Negative
Negative. Ct are below thresshold, but the melting curve reveal that signal are unspecific
					S. gallolyticus spp.				S. gallolyticus subsp. gallolyticus				F. nucleatum				B. fragilis				B-actin				five year follow up (months following diagnosis)
Sample ID	Age	Sample age (years)	Location	Diverticulum / diverticulitis	Ct 1	Ct 2	Ct 3	Mean	Ct 1	Ct 2	Ct 3	Mean	Ct 1	Ct 2	Ct 3	Mean	Ct 1	Ct 2	Ct 3	Mean	Ct 1	Ct 2	Ct 3	Mean	Adenom	CRC	Death
U001	50-59	5	Sigmoideum	Diverticulitis	35.92	34.17	34.51	34.8667	29.6	29.64	29.42	29.5533	35.22	33.8	33.28	34.1	28.61	28.71	28.99	28.77	22.65	22.73	23.01	22.7967	-	-	-
U002	50-59	5	Sigmoideum	Diverticulum	35.07	40	34.73	36.6	29.23	29.67	29.95	29.6167	23.98	24.04	24.01	24.01	24.76	24.88	24.63	24.7567	23.37	23.33	23.75	23.4833	-	-	-
U003	60-69	5	Sigmoideum	Diverticulitis	36.48	37.17	37.2	36.95	31.28	30.78	30.42	30.8267	34.77	33.95	34.44	34.3867	29.56	29.52	29.4	29.4933	23.2	23.18	23.68	23.3533	-	-	-
U004	40-49	5	Sigmoideum	Diverticulitis	38.93	37.08	37.61	37.8733	28.99	29.71	29.03	29.2433	34.38	35.01	35.23	34.8733	31.4	31.17	31.14	31.2367	26.37	26.45	26.8	26.54	-	-	-
U005	60-69	5	Sigmoideum	Diverticulitis	34.06	35.7	35.56	35.1067	29.95	29.85	29.88	29.8933	26.29	26.47	26.33	26.3633	25.86	25.97	25.72	25.85	21.78	21.7	22.16	21.88	-	-	-
U006	50-59	5	Sigmoideum	Diverticulum	37.65	35.54	35.97	36.3867	30.53	30.49	30.75	30.59	31.81	31.97	31.91	31.8967	29.32	29.25	29.3	29.29	21.7	40	22.82	22.26	-	-	-
U007	60-69	5	Caecum	Diverticulum	37	36.42	36.48	36.6333	30.46	30.01	29.85	30.1067	29.89	30.1	29.81	29.9333	29.43	29.14	29.32	29.2967	23.55	23.49	24.04	23.6933	-	-	-
U008	70-79	5	Left colon	Diverticulum	33.46	32.94	32.62	33.0067	30.05	29.68	29.83	29.8533	19.69	19.57	20.05	19.77	21	21.09	21.07	21.0533	22.65	22.81	23.43	22.9633	-	-	-
U009	60-69	5	Colon	Diverticulum	37.8	37.72	37.24	37.5867	30.12	30.37	30.09	30.1933	29.85	29.96	30.05	29.9533	28.4	28.33	28.49	28.4067	23.89	23.66	24.02	23.8567	-	-	-
U010	80-89	5	Sigmoideum	Diverticulum	36.49	36.07	35.05	35.87	29.92	30.04	28.8	29.5867	27.32	27.68	27.44	27.48	26.47	26.75	26.54	26.5867	22.85	23	23.01	22.9533	-	-	-
U011	40-49	5	Sigmoideum	Diverticulitis	36.73	36.09	35.8	36.2067	30.56	30.18	29.91	30.2167	31.8	32	32.87	32.2233	29.74	29.55	29.35	29.5467	23.02	22.78	23.17	22.99	-	-	-
U012	40-49	5	Sigmoideum	Diverticulitis	34.04	33.51	33.44	33.6633	29.93	30.12	29.94	29.9967	31.5	32.27	30.72	31.4967	28.09	28.15	27.78	28.0067	21.75	21.83	22.06	21.88	-	-	-
U013	60-69	6	Sigmoideum	Diverticulitis	36.29	35.17	36.62	36.0267	30.83	30.14	30.31	30.4267	34.66	32.79	32.15	33.2	29.98	30.17	29.72	29.9567	22.81	22.94	23.12	22.9567	-	-	-
U014	50-59	6	Sigmoideum	Diverticulitis	37.27	36.87	36.87	37.0033	30.5	30.28	30.75	30.51	26.66	26.77	26.89	26.7733	26.83	26.87	26.77	26.8233	23.59	23.69	24.02	23.7667	-	-	-
U015	70-79	6	Sigmoideum	Diverticulitis	36.46	38.63	36.29	37.1267	29.48	29.76	29.91	29.7167	32.14	31.42	-	31.78	30.79	29.88	29.96	30.21	26.22	26.28	26.52	26.34	-	-	-
U016	60-69	6	Sigmoideum	Diverticulitis	35.52	35.49	34.67	35.2267	30.74	30.84	31.47	31.0167	31.02	30.49	31.33	30.9467	27.99	27.72	27.84	27.85	23.34	23.23	23.55	23.3733	-	-	-
U017	70-79	6	Sigmoideum	Diverticulitis	35.57	36.05	36.57	36.0633	30.55	30.18	30.42	30.3833	29.5	29.9	29.52	29.64	27.56	27.62	27.61	27.5967	22.33	22.38	22.85	22.52	-	-	-
U018	<40	6	Sigmoideum	Diverticulitis	33.84	34.1	34.13	34.0233	29.51	29.51	29.64	29.5533	28.17	28.28	28.32	28.2567	26.76	26.81	26.57	26.7133	21.65	21.7	21.87	21.74	-	-	-
U019	80-89	6	Sigmoideum	Diverticulitis	35.9	35.76	35.58	35.7467	30.13	30.11	29.99	30.0767	28.22	28.1	28.23	28.1833	27.72	29.66	27.91	28.43	21.94	21.9	22.22	22.02	-	-	-
U020	60-69	6	Sigmoideum	Diverticulum	38.64	36.66	38.14	37.8133	29.56	29.63	29.79	29.66	34.69	33.84	30.89	33.14	30.95	31.04	31.12	31.0367	26.08	26.22	26.3	26.2	-	-	-
U021	60-69	6	Sigmoideum	Diverticulitis	36.53	36.26	35.83	36.2067	30.54	30.22	30.1	30.2867	26.32	26.26	26.19	26.2567	26.23	26.2	40	26.215	22.85	22.9	23.23	22.9933	-	-	-
U022	50-59	6	Sigmoideum	Diverticulitis	38.46	36.62	36.13	37.07	29.51	29.09	29.15	29.25	32.67	33.65	34.93	33.75	31.19	31.39	31.05	31.21	25.71	25.87	25.92	25.8333	-	-	-
U023	<40	6	Sigmoideum	Diverticulitis	36.8	39.39	35.67	37.2867	29.04	29.35	28.98	29.1233	31.23	31.28	31.49	31.3333	29.58	29.02	29.07	29.2233	26.05	26.12	26.43	26.2	-	-	-
U024	80-89	6	Sigmoideum	Diverticulitis	34.3	34.68	34.77	34.5833	29.93	30.05	30.1	30.0267	25.4	25.51	24.48	25.13	24.48	24.72	24.75	24.65	22.25	22.31	22.68	22.4133	-	-	0
U025	50-59	6	Sigmoideum	Diverticulitis	37.9	37.37	36.52	37.2633	29.12	28.74	28.33	28.73	33.76	32.9	33.35	33.3367	32.16	32.1	31.8	32.02	27.92	28.06	28.18	28.0533	-	-	-
U026	70-79	6	Sigmoideum	Diverticulitis	38.72	38.44	38.07	38.41	30	29.8	29.9	29.9	32.44	30.53	32.61	31.86	32.04	31.99	31.85	31.96	25.78	25.68	26.05	25.8367	-	-	-
U027	50-59	11	Caecum	Diverticulum	39.74	38.07	38.27	38.6933	31.45	30.67	30.4	30.84	32.76	30.54	32.85	32.05	31.59	31.72	32.63	31.98	24.53	24.68	24.64	24.6167	-	-	-
U028	80-89	11	Sigmoideum	Diverticulitis	39.43	38.61	37.71	38.5833	30.75	30.51	30.93	30.73	31.04	30.59	31.19	30.94	30.921	31.14	30.7	30.9203	23.59	23.53	23.89	23.67	-	-	42
U029	60-69	6	Sigmoideum	Diverticulitis	37.78	39	37.03	37.9367	31.16	31.34	31.66	31.3867	35.5	35.57	36.4	35.8233	30.95	30.95	30.54	30.8133	23.57	23.72	23.75	23.68	-	-	-
U030	60-69	7	Sigmoideum	Diverticulitis	35.34	35.1	35.95	35.4633	30.46	30.73	31.14	30.7767	30.73	31.5	31.2	31.1433	28.81	28.04	28.33	28.3933	22.02	22.18	22.46	22.22	-	-	-
U031	60-69	7	Sigmoideum	Diverticulitis	37.87	37.82	36.4	37.3633	29.26	29.2	29.15	29.2033	32.76	32.07	30.56	31.7967	31.47	31.72	31.26	31.4833	27.06	27.04	27.45	27.1833	-	-	-
U032	60-69	7	Sigmoideum	Diverticulitis	37.15	35.63	37.34	36.7067	30.39	30.36	30.31	30.3533	31.16	30.9	30.79	30.95	29.48	29.38	29.45	29.4367	22.97	22.91	23.3	23.06	-	-	-
U033	70-79	7	Sigmoideum	Diverticulitis	40	37.25	38.93	38.7267	30.22	30.39	30.13	30.2467	31.61	32.57	32.06	32.08	31.9	31.64	31.5	31.68	25.87	25.95	26.13	25.9833	-	-	1
U034	80-89	7	Sigmoideum	Diverticulitis	38.49	36.53	37.46	37.4933	30.5	30.43	30.89	30.6067	31.17	33.23	34.32	32.9067	30.05	29.85	29.85	29.9167	24.04	24.33	24.35	24.24	-	-	1
U035	50-59	7	Sigmoideum	Diverticulitis	35.86	35.22	35.68	35.5867	30.6	30.36	30.22	30.3933	26.19	26.38	26.22	26.2633	25.94	26.19	25.88	26.0033	22.32	22.45	22.64	22.47	-	-	-
U036	60-69	7	Left colon	Diverticulitis	36.53	37.67	39.51	37.9033	29.33	29.39	29.63	29.45	31.88	33.12	32.73	32.5767	31.38	31.07	31.25	31.2333	26	26.05	26.33	26.1267	-	-	-
U037	70-79	7	Sigmoideum	Diverticulitis	39.83	40	38.91	39.58	29.46	29.57	29.25	29.4267	31.65	32.06	31,53,	31.855	29.6	30	29.83	29.81	26.45	26.54	26.62	26.5367	-	-	-
U038	40-49	7	Caecum	Diverticulitis	35.71	36.8	37.6	36.7033	30.96	31.07	30.99	31.0067	32.27	32.43	32.71	32.47	29.37	29.49	29.52	29.46	23.45	23.64	23.89	23.66	-	-	-
U039	80-89	7	Sigmoideum	Diverticulitis	34.85	34.22	34.85	34.64	29.74	29.61	29.63	29.66	22.61	22.59	22.73	22.6433	22.54	22.42	22.42	22.46	21.83	21.9	22.16	21.9633	-	-	-
U040	60-69	7	Sigmoideum	Diverticulitis	36.72	36.64	36.71	36.69	30.06	30.45	30.58	30.3633	29.06	29.01	29.27	29.1133	26.79	26.7	26.68	26.7233	23.14	23.04	23.42	23.2	-	-	-
U041	80-89	7	Sigmoideum	Diverticulitis	37.05	37.7	37.56	37.4367	31.19	30.5	30.21	30.6333	31.82	31.6	32.15	31.8567	30.27	30.32	29.99	30.1933	23.72	23.4	23.9	23.6733	-	-	-
U042	40-49	7	Right colon flexur	Diverticulitis	37.2	37.48	37.84	37.5067	30.47	30.55	30.63	30.55	30.5	29.97	30.75	30.4067	29.85	29.67	29.47	29.6633	23.41	23.56	23.88	23.6167	-	-	-
U043	60-69	7	Sigmoideum	Diverticulitis	38.07	38.08	40	38.7167	29.67	29.76	29.87	29.7667	31.26	31.19	31.46	31.3033	30.93	31.06	30.71	30.9	26.86	26.8	27.34	27	-	-	-
U044	50-59	7	Sigmoideum	Diverticulitis	36.92	37.75	37.51	37.3933	31.17	31.32	31.58	31.3567	36.35	35.07	35.26	35.56	30.7	30.75	30.2	30.55	23.04	23.41	23.34	23.2633	-	-	-
U045	50-59	8	Sigmoideum	Diverticulitis	37.26	36.83	38.29	37.46	31.19	30.86	30.49	30.8467	26.95	26.76	26.93	26.88	29.92	29.99	29.68	29.8633	23.14	23.32	23.76	23.4067	-	-	-
U046	40-49	8	Sigmoideum	Diverticulitis	36.23	36.53	36.58	36.4467	30.18	30.03	30.22	30.1433	28.03	28.08	27.93	28.0133	27.51	27.58	27.27	27.4533	22.55	22.76	22.95	22.7533	-	-	-
U047	60-69	8	Not assigned	Diverticulum	38.42	37.06	36.53	37.3367	28.78	28.79	28.63	28.7333	32.99	34.75	33.73	33.8233	32.6	32.5	32.73	32.61	27.09	26.89	27.29	27.09	-	-	-
U048	50-59	8	Sigmoideum	Diverticulitis	37.87	37.08	37.07	37.34	30.7	30.66	30.91	30.7567	36	34.25	34.16	34.8033	31.71	31.32	31.19	31.4067	23.19	23.08	23.55	23.2733	-	-	-
U049	50-59	8	Sigmoideum	Diverticulitis	38.94	36.99	39.25	38.3933	29.68	29.48	29.33	29.4967	30.42	30.444	30.41	30.4247	28.63	28.48	28.3	28.47	26.54	26.64	26.73	26.6367	-	-	-
U050	70-79	8	Sigmoideum	Diverticulitis	36.63	36.63	37.06	36.7733	30.06	29.98	29.78	29.94	29.73	29.87	30	29.8667	29.9	29.17	29.11	29.3933	22.82	22.94	23.24	23	-	-	-
U051	60-69	8	Sigmoideum	Diverticulitis	36.46	37.61	36.73	36.9333	30.52	30.74	30.5	30.5867	32.47	33.15	32.86	32.8267	31.71	31.71	31.94	31.7867	23.4	23.16	23.77	23.4433	-	-	-
U052	40-49	8	Sigmoideum	Diverticulitis	37.46	37.65	37.22	37.4433	30.63	31.78	30.34	30.9167	33.82	33.52	33.95	33.7633	31.35	32.06	31.62	31.6767	23.95	24.21	24.64	24.2667	-	-	-
U053	50-59	8	Sigmoideum	Diverticulitis	36.66	37.44	36.53	36.8767	31.47	30.82	30.82	31.0367	30.44	30.3	30.64	30.46	30.52	30.63	30.26	30.47	24.45	24.19	24.74	24.46	?	?	?	Foreign patient, thus no follow up
U054	60-69	8	Sigmoideum	Diverticulitis	36.18	35.22	36.09	35.83	30.23	30.73	30.47	30.4767	28.13	28.08	28.26	28.1567	28.34	28.34	28.38	28.3533	23.89	23.75	24.28	23.9733	-	-	-
U055	40-49	8	Sigmoideum	Diverticulum	37.92	38.48	39.96	38.7867	29.8	29.56	29.24	29.5333	32.09	31.59	31.66	31.78	32.37	32.71	32.32	32.4667	26.72	26.74	27.14	26.8667	-	-	-
U056	70-79	8	Sigmoideum	Diverticulitis	37.28	36.87	37.02	37.0567	30.78	30.59	31.12	30.83	33.91	33.63	33.83	33.79	31.65	31.53	31.96	31.7133	23.68	23.8	24.19	23.89	-	-	-
U057	40-49	8	Sigmoideum	Diverticulitis	40	38.17	38.86	39.01	30.04	30.02	30.03	30.03	31.87	31.33	32.37	31.8567	32.73	32.55	32.67	32.65	26.87	27.03	27.48	27.1267	-	-	-
U058	50-59	8	Sigmoideum	Diverticulitis	35.76	37.22	36.22	36.4	30	30.2	30.56	30.2533	34.51	34.22	34.91	34.5467	32.32	31.67	31.66	31.8833	25.61	25.65	25.95	25.7367	-	-	-
U059	40-49	8	Sigmoideum	Diverticulitis	36.52	35.78	37.16	36.4867	31.27	30.64	30.54	30.8167	32.67	32.93	32.71	32.77	30.47	30.67	31.12	30.7533	23.61	23.64	24.29	23.8467	-	-	-
U060	60-69	8	Sigmoideum	Diverticulitis	39.42	38.34	38.29	38.6833	31.21	30.62	30.58	30.8033	32.51	32.53	32.26	32.4333	31.27	31.11	31.42	31.2667	23.51	23.36	23.97	23.6133	-	-	-
U061	50-59	8	Sigmoideum	Diverticulitis	37.54	37.22	37.16	37.3067	30.54	30.54	30.18	30.42	34.12	33.83	33.4	33.7833	32.71	32.963	32.22	32.631	24.09	24.05	24.56	24.2333	-	-	-
U062	60-69	8	Sigmoideum	Diverticulitis	37.26	37.92	37.68	37.62	31.57	31.13	31.7	31.4667	27.38	27.29	27.47	27.38	26.78	26.98	26.64	26.8	23.05	23.24	23.45	23.2467	-	-	-
U063	80-89	8	Sigmoideum	Diverticulitis	36.65	36.42	36.72	36.5967	30.13	29.74	29.58	29.8167	31.68	30.8	32.27	31.5833	31.3	31.13	31.04	31.1567	26.22	26.18	26.47	26.29	-	-	-
U064	80-89	9	Sigmoideum	Diverticulum	37.21	36.3	36.19	36.5667	30.16	29.96	29.91	30.01	26.69	26.74	26.81	26.7467	26.99	26.88	26.69	26.8533	23.01	22.88	23.21	23.0333	-	-	-
U065	70-79	9	Sigmoideum	Diverticulum	35.61	35.7	36.93	36.08	30.17	30.04	29.79	30	33.39	33.75	33.25	33.4633	30.29	30.56	30.27	30.3733	23.76	23.88	24.23	23.9567	-	-	-
U066	50-59	9	Sigmoideum	Diverticulitis	37.9	37.13	37.51	37.5133	29.5	29.57	29.56	29.5433	31.41	31.22	31.43	31.3533	33.35	32.94	33.16	33.15	26.87	26.84	27.3	27.0033	-	-	35
U067	<40	9	Sigmoideum	Diverticulum	39.13	36.74	35.87	37.2467	29.77	29.14	29.09	29.3333	25.38	25.59	25.63	25.5333	23.84	23.92	23.94	23.9	27.06	27.17	27.66	27.2967	-	-	1
U068	40-49	9	Sigmoideum	Diverticulum	37.81	37.79	36.98	37.5267	30.19	30.21	30.35	30.25	34.97	34.93	30.43	33.4433	36.14	31.56	31.08	32.9267	23.5	23.72	24.01	23.7433	-	-	-
U069	80-89	9	Sigmoideum	Diverticulum	36.46	37.87	37.35	37.2267	31.14	30.33	30.07	30.5133	26.37	26.12	26.09	26.1933	24.67	24.6	24.21	24.4933	23.25	23.08	23.43	23.2533	1	2	57
U070	80-89	9	Sigmoideum	Diverticulum	36.13	35.76	36.63	36.1733	30.3	30.32	30.5	30.3733	31.49	30.89	31.37	31.25	30.2	31.67	30.27	30.7133	22.28	21.96	22.53	22.2567	-	-	-
U071	60-69	9	Sigmoideum	Diverticulitis	38.75	37.61	38.19	38.1833	30.6	30.64	30.52	30.5867	30.41	30.23	30.6	30.4133	29.65	29.28	29.39	29.44	23.37	23.6	23.68	23.55	-	-	-
U072	40-49	9	Sigmoideum	Diverticulum	36,,79	36.66	36.59	36.625	30.4	30.31	30.57	30.4267	27.78	28.08	27.91	27.9233	26.99	26.84	26.84	26.89	22.11	22.16	22.3	22.19	-	-	-
U073	60-69	9	Left colon	Diverticulitis	39.34	38.23	40	39.19	29.86	29.47	29.42	29.5833	32.5	32.74	32.57	32.6033	32.25	31.49	31.38	31.7067	26.99	26.96	27.22	27.0567	-	-	-
U074	50-59	9	Sigmoideum	Diverticulitis	38.92	40	40	39.64	29.66	29.56	29.68	29.6333	33.43	33.08	33.28	33.2633	32.33	32.3	32.13	32.2533	26.83	26.86	27.33	27.0067	-	-	-
U075	70-79	9	Sigmoideum	Diverticulitis	40	40	38.77	39.59	29.58	29.68	29.31	29.5233	32.89	33.57	34.25	33.57	31.3	31.19	31.15	31.2133	23.48	23.57	23.77	23.6067	-	-	1
U076	70-79	11	Left colon	Diverticulum	35.47	37.15	37.25	36.6233	29.71	29.5	30	29.7367	32.44	32.49	32.71	32.5467	29.06	28.85	28.68	28.8633	23.97	23.87	24.34	24.06	-	-	-
U077	50-59	9	Sigmoideum	Diverticulitis	37.38	36.48	36.65	36.8367	29.65	29.66	29.3	29.5367	33.55	32.84	33.57	33.32	31.2	31.45	31.44	31.3633	25.04	24.96	25.47	25.1567	-	-	-
U078	70-79	9	Sigmoideum	Diverticulitis	37.04	36.25	37.1	36.7967	29.81	29.68	29.58	29.69	34.84	33.9	34.32	34.3533	31.82	31.68	31.51	31.67	23.94	23.85	24.3	24.03	-	-	1
U079	70-79	9	Sigmoideum	Diverticulitis	36.6	36.33	35.69	36.2067	29.93	29.89	29.67	29.83	24.97	25.14	25.13	25.08	26.41	26.63	26.42	26.4867	22.63	22.67	23.05	22.7833	-	-	1
U080	70-79	9	Sigmoideum	Diverticulum	37.3	37.23	36.41	36.98	30.31	30.36	30.7	30.4567	35.71	36.35	35.6	35.8867	31.81	31.85	31.83	31.83	23.08	23.21	23.75	23.3467	-	-	0
U081	80-89	9	Sigmoideum	Diverticulitis	35.72	36.58	36.91	36.4033	30.77	30.25	30.13	30.3833	28.5	28.56	28.67	28.5767	28.65	28.27	28.41	28.4433	23.28	23.05	23.27	23.2	-	-	1
U082	80-89	9	Sigmoideum	Diverticulitis	38.17	37.72	37.5	37.7967	30.79	30.1	30.83	30.5733	24.85	25.05	25.07	24.99	24.37	24.47	24.33	24.39	22.84	22.98	23.49	23.1033	-	-	-
U083	40-49	9	Sigmoideum	Diverticulitis	37.72	36.68	36.46	36.9533	30.35	29.85	29.83	30.01	27.9	27.9	27.88	27.8933	28.56	28.59	28.85	28.6667	23.2	23.24	23.61	23.35	-	-	-
U084	80-89	9	Sigmoideum	Diverticulitis	35.96	36.98	36.23	36.39	30.2	29.77	30.34	30.1033	33.18	33.24	33.13	33.1833	29.91	29.62	29.72	29.75	23.04	22.87	23.39	23.1	-	-	26
U085	70-79	9	Sigmoideum	Diverticulitis	37.9	37.86	37.33	37.6967	32.13	32.17	32.03	32.11	26.77	26.75	26.93	26.8167	27.33	27.28	27.17	27.26	23.03	22.94	23.33	23.1	-	-	-
U086	60-69	10	Sigmoideum	Diverticulitis	35.64	37.51	37.56	36.9033	31.66	31.59	31.39	31.5467	26.68	26.82	26.7	26.7333	27.69	27.91	27.69	27.7633	23.34	23.39	23.94	23.5567	-	-	-
U087	60-69	10	Sigmoideum	Diverticulum	37.23	36.87	36.97	37.0233	31.28	30.81	30.74	30.9433	32.58	33.64	33.2	33.14	30.42	30.2	29.92	30.18	26.67	26.77	27.16	26.8667	-	-	-
U088	50-59	10	Sigmoideum	Diverticulitis	36.52	36.07	37	36.53	31.84	31.85	31.87	31.8533	29.18	29.11	29.57	29.2867	29.19	29.51	29.26	29.32	23.26	23.55	23.75	23.52	-	-	-
U089	50-59	10	Sigmoideum	Diverticulitis	34.84	35.52	34.35	34.9033	31.13	30.97	31.04	31.0467	31.49	31.71	31.86	31.6867	30.96	30.61	29.88	30.4833	22	22.01	22.16	22.0567	6	-	-
U090	40-49	10	Sigmoideum	Diverticulitis	35.75	36	37.46	36.4033	31.52	31.58	31.89	31.6633	28.75	28.88	28.82	28.8167	27.04	26.8	26.93	26.9233	23.18	23.23	23.76	23.39	-	-	-
U091	80-89	10	Colon	Diverticulum	38.18	37.06	36.29	37.1767	32.26	32.5	31.89	32.2167	32.44	32.56	33.06	32.6867	28.92	29.26	29.62	29.2667	23.09	23.42	23.85	23.4533	-	-	-
U092	80-89	10	Sigmoideum	Diverticulitis	36.08	35.72	35.74	35.8467	32.32	31.8	31.79	31.97	31.43	31.52	31.84	31.5967	29.71	29.92	29.9	29.8433	23.93	23.91	23.97	23.9367	-	-	1
U093	40-49	10	Sigmoideum	Diverticulitis	36.47	36.51	37.19	36.7233	31.52	31.2	30.99	31.2367	32.1	31.66	32.83	32.1967	31.03	30.61	30.62	30.7533	23.63	23.97	23.74	23.78	-	-	90
U094	50-59	10	Sigmoideum	Diverticulum	38.34	38.33	38.51	38.3933	31.93	32.36	32.29	32.1933	30.03	30.52	30.09	30.2133	31.81	32	31.68	31.83	24.14	24.16	24.36	24.22	?	?	?	Foreign patient, thus no follow up
U095	50-59	10	Sigmoideum	Diverticulitis	36.94	37.71	35.37	36.6733	32.51	32.42	32.05	32.3267	29.66	29.85	30.09	29.8667	29.04	29.01	29.21	29.0867	25.23	25.21	25.53	25.3233	-	-	-
U096	50-59	10	Descendens	Diverticulum	40	37.16	38.79	38.65	31.7	31.86	31.44	31.6667	33.45	33.18	33.7	33.4433	33.03	32.49	32.08	32.5333	26.38	26.45	26.61	26.48	-	-	-
U097	50-59	10	Sigmoideum	Diverticulitis	38.49	39.12	38.02	38.5433	32.61	31.9	31.99	32.1667	29.11	29.34	29.88	29.4433	28.22	28.16	28.2	28.1933	23.28	23.58	23.67	23.51	-	-	-
U098	80-89	10	Sigmoideum	Diverticulitis	36.456	37.65	37.96	37.3553	32.02	31.94	32.43	32.13	32.69	33.27	33.04	33	30.5	30.86	30.55	30.6367	24.25	24.32	24.52	24.3633	-	-	5
U099	60-69	10	Sigmoideum	Diverticulitis	37.16	37.2	37.52	37.2933	31.69	31.57	31.66	31.64	30.5	30.65	30.41	30.52	30.75	31.14	30.7	30.8633	25.06	25.12	25.32	25.1667	-	-	-
U100	40-49	10	Sigmoideum	Diverticulitis	37.57	37.92	37.75	37.7467	32.73	32.87	32.95	32.85	34.47	35.15	34.89	34.8367	30.47	30.27	30.12	30.2867	23.89	23.66	23.96	23.8367	-	-	-
U101	70-79	10	Sigmoideum	Diverticulitis	35.11	35.56	36.19	35.62	31.91	31.5	31.34	31.5833	32.98	32.1	31.99	32.3567	29.11	28.76	28.78	28.8833	24.58	24.79	24.92	24.7633	-	-	-
U102	70-79	10	Descendens	Diverticulitis	40	40	40	40	30.77	30.97	30.7	30.8133	32.63	33.55	32.78	32.9867	33.88	33.35	33.4	33.5433	28.9	28.87	28.86	28.8767	-	-	-
U103	80-89	11	Sigmoideum	Diverticulum	40	39.25	37.15	38.8	30.95	30.85	30.85	30.8833	32.63	32.56	31.78	32.3233	32.19	32.2	32.11	32.1667	28.18	28.44	28.8	28.4733	-	-	-
U104	80-89	11	Sigmoideum	Diverticulitis	35.66	35.84	36.36	35.9533	31.7	31.57	32.02	31.7633	27.12	27.04	27.14	27.1	29.66	28.83	28.86	29.1167	23.27	23.08	23.4	23.25	-	-	1

## Sheet: Empty paraffin blocks
Positive
Negative
Negative. Ct are below thresshold, but the melting curve reveal that signal are unspecific
		S. gallolyticus spp.				F. nucleatum				B. fragilis				B-actin
Sample ID	Sample age (years)	Ct 1	Ct 2	Ct 3	Mean	Ct 1	Ct 2	Ct 3	Mean	Ct 1	Ct 2	Ct 3	Mean	Ct 1	Ct 2	Ct 3	Mean
X001	0	34.49	34.94	34.71	34.7133	32.69	32.23	32.52	32.48	33.01	31.51	40	34.84	33.62	33.67	34.68	33.99
X002	0	34.52	32.76	33.46	33.58	31.6	32.18	30.13	31.3033	31.28	31.09	31.78	31.3833	32.33	31.65	33.9	32.6267
X003	0	38.41	34.55	35	35.9867	31.14	30.49	31.43	31.02	32.73	33.32	32.64	32.8967	31.7	32.36	32.31	32.1233
X004	0	35.08	32.67	35.56	34.4367	32.93	31.921	32.25	32.367	33.92	32.98	32.39	33.0967	32.89	32.87	33.28	33.0133
X005	0	35.06	35.73	34.28	35.0233	30.18	30.18	30.46	30.2733	33.31	32.86	32.67	32.9467	34.46	34.83	34.67	34.6533
X006	0	34.77	35.32	34.91	35	31.02	31.5	31.25	31.2567	32.92	32.24	32.43	32.53	33.45	32.78	33.44	33.2233
X007	0	37.78	36.73	34.57	36.36	31.06	31.46	31.22	31.2467	33.29	33.66	32.96	33.3033	36.25	36.45	36.05	36.25
X008	0	34.7	35.47	35.78	35.3167	31.77	31.4	32.26	31.81	34.42	33.83	32.82	33.69	33.35	33.11	33.53	33.33
X009	0	37.34	35.08	35.11	35.8433	30.91	31.24	31.11	31.0867	35.03	33.65	33.26	33.98	32.46	32.63	32.54	32.5433
X019	0	34.72	32.34	32.67	33.2433	30.92	31.32	40	34.08	32.25	31.84	31.94	32.01	32	31.91	32.97	32.2933
X020	0	35.87	36.26	35.86	35.9967	32	32.24	31.14	31.7933	33.83	32.33	31.66	32.6067	31.19	31.59	32.21	31.6633
X021	0	32.01	33.13	36.13	33.7567	31.51	31.68	31.72	31.6367	34.25	32.87	33.13	33.4167	32.89	33.06	32.88	32.9433
X022	0	31.34	36.1	36.05	34.4967	32.51	32.29	33.02	32.6067	32.46	32.19	31.53	32.06	32.06	32.39	32.4	32.2833
X024	0	35.28	37.95	36.52	36.5833	30.86	31.08	31.7	31.2133	32.51	33.02	33.92	33.15	33.88	34.45	34.84	34.39
X025	0	38.13	33.71	34.28	35.3733	31.66	31.41	31.79	31.62	35.79	32.5	33.51	33.9333	35.56	35.16	36.48	35.7333
X026	0	34.94	35.12	35.83	35.2967	30.82	31.65	31.38	31.2833	32.29	33.27	34.07	33.21	37.06	36.83	36.69	36.86
X027	0	31.72	31.75	33.34	32.27	33.39	32.66	33.26	33.1033	33.65	34.51	34.42	34.1933	32.8	32.57	33.29	32.8867
Note, the numbers of the empty paraffin blocks are not consecutive.
