# Supplementary material for: The presence of bacteria varies between colorectal adenocarcinomas, precursor lesions and non-malignant tissue
Source: BMC Cancer. 2019 Apr 29;19:399. doi: 10.1186/s12885-019-5571-y (PMC6489238; doi:10.1186/s12885-019-5571-y)
Supplement: Supplementary file 2 — Tissue samples used for 16S rRNA gene sequencing. Quantification cycles obtained using qPCR and clinical information for each clinical sample investigated using Illumina sequencing of the V4 region of the 16S rRNA gene. (XLSX 31 kb) [file 12885_2019_5571_MOESM2_ESM.xlsx]

## Sheet: CRC - Tumor + Paired normal tis
Tumor tissue																												Paired normal tissue
			TMN Stage					S. gallolyticus spp.				S. gallolyticus subsp. gallolyticus				F. nucleatum				B. fragilis				B-actin					S. gallolyticus spp.				S. gallolyticus subsp. gallolyticus				F. nucleatum				B. fragilis				B-actin				five year follow up (months following diagnosis)
Sample ID	Age	Location	pT	pN	pM	pV	Rank	Ct 1	Ct 2	Ct 3	Mean	Ct 1	Ct 2	Ct 3	Mean	Ct 1	Ct 2	Ct 3	Mean	Ct 1	Ct 2	Ct 3	Mean	Ct 1	Ct 2	Ct 3	Mean	Sample ID	Ct 1	Ct 2	Ct 3	Mean	Ct 1	Ct 2	Ct 3	Mean	Ct 1	Ct 2	Ct 3	Mean	Ct 1	Ct 2	Ct 3	Mean	Ct 1	Ct 2	Ct 3	Mean	Adenom
K008T	60-69	Ascedens	4	1	1	0	IV	35.61	35.5	36.38	35.83	34.74	34.5	34.13	34.4567	25.77	26	26.15	25.9733	28.92	28.13	28.26	28.4367	21.45	21.31	21.75	21.5033	K008R	34.56	35.23	35.63	35.14	34.14	34.41	34.16	34.2367	27.43	26.92	27.66	27.3367	27.8	27.79	27.74	27.7767	22.04	22.21	22.5	22.25	-
K014T	50-59	Caecum	3	0	0	0	II	36.73	38.43	39.11	38.09	34.88	34.54	34.4	34.6067	25.56	25.57	25.76	25.63	25.91	25.86	25.86	25.8767	22.2	22.32	22.43	22.3167	K014R	36.33	36.78	35.92	36.3433	35.09	34.93	35.68	35.2333	26.65	26.64	26.57	26.62	26.46	26.64	26.41	26.5033	22.74	22.86	23.18	22.9267	-
K016T	80-89	Transversum	3	2	0	0	III	36.08	37.55	37.19	36.94	36.99	37.46	35.57	36.6733	32.82	32.41	33.87	33.0333	30.52	30.17	30.53	30.4067	22.47	22.55	22.98	22.6667	K016R	35.13	35.21	35.06	35.1333	34.48	35.24	35.18	34.9667	29.71	29.71	29.86	29.76	29.12	29.11	29.14	29.1233	23.23	23.2	23.54	23.3233	-
K024T	70-79	Caecum	3	1	0	0	III	36.27	36.42	35.79	36.16	34.25	34.14	33.5	33.9633	28.22	22.4	28.44	26.3533	28.43	28.57	28.61	28.5367	22.1	21.98	22.49	22.19	K024R	34.77	35.23	35.47	35.1567	34.15	34	33.99	34.0467	27.7	27.91	27.87	27.8267	26.65	26.63	26.54	26.6067	22.61	22.5	23.12	22.7433	-
K042T	60-69	Transversum	2	0	0	0	I	35.55	35.11	35.81	35.49	35.06	33.9	34.58	34.5133	27.92	27.98	27.88	27.9267	24.9	25.13	24.91	24.98	21.97	22.06	22.25	22.0933	K042R	35.44	36.2	34.86	35.5	34.91	35	35.59	35.1667	32.42	33.1	32.85	32.79	29.39	28.6	28.42	28.8033	22.05	22.2	22.39	22.2133	37
K050T	80-89	Caecum	3	0	0	0	II	38.16	36.33	38.35	37.6133	34.33	37.24	35.84	35.8033	30.37	30.38	30.42	30.39	33.66	33.46	33.54	33.5533	27.08	27.04	27.46	27.1933	K050R	38.19	36.3	37.66	37.3833	36.97	36.46	36.31	36.58	32.84	32.3	32.13	32.4233	33.59	33.91	33.56	33.6867	26.48	26.44	26.72	26.5467	-
K056T	60-69	Ascedens	3	0	0	0	II	37.2	38.08	37.37	37.55	36.86	35.58	36.47	36.3033	35.58	36.3	34.91	35.5967	32	31.99	31.86	31.95	23.16	23.05	23.37	23.1933	K056R	37.51	36.26	36.35	36.7067	35.74	35.2	36.35	35.7633	26.99	27.15	26.96	27.0333	27.07	26.52	26.36	26.65	22.96	22.99	23.45	23.1333	-
K074T	70-79	Caecum	3	2	X	1	III	37.58	37.73	39.19	38.1667	33.38	33.1	33.39	33.29	32.21	32.75	33.27	32.7433	30.73	30.84	30.59	30.72	23.24	23.26	23.46	23.32	K074R	36.86	36.36	36.95	36.7233	33.37	32.94	33.52	33.2767	31.25	30.86	31.11	31.0733	30.58	30.49	30.92	30.6633	23.33	23.61	23.7	23.5467	-
K084T	>90	Ascedens	3	1	X	0	III	36.93	36.42	37.17	36.84	33.53	32.02	32.61	32.72	26.65	26.73	26.8	26.7267	25.92	25.39	25.3	25.5367	22.8	22.6	22.86	22.7533	K084R	36.62	36.22	35.27	36.0367	32.78	33.21	33.39	33.1267	29.86	29.8	29.97	29.8767	30.01	30.45	30.65	30.37	23.66	23.67	24.2	23.8433	-
K096T	70-79	Caecum	4	2	X	0	III	37.06	37.15	36.39	36.8667	31	31.15	30.58	30.91	35.54	36.31	35.75	35.8667	31.01	31.03	30.99	31.01	23.05	23.19	23.29	23.1767	K096R	36.05	35.72	35.76	35.8433	31.73	31.94	32.12	31.93	32.55	32.27	32.44	32.42	31.38	30.82	30.68	30.96	22.97	23.06	23.16	23.0633	-
Positive																												Positive
Negative																												Negative
Negative. Ct are below thresshold, but the melting curve reveal that signal are unspecific																												Negative. Ct are below threshold, but the melting curve reveal that signal are unspecific
[truncated: 2 more columns]

## Sheet: Adenoma
Adenomatous polyp
					S. gallolyticus spp.				S. gallolyticus subsp. gallolyticus				F. nucleatum				B. fragilis				B-actin				five year follow up (months following diagnosis)
Sample ID	Age	Adenoma type	Degree of dysplasia	Location	Ct 1	Ct 2	Ct 3	Mean	Ct 1	Ct 2	Ct 3	Mean	Ct 1	Ct 2	Ct 3	Mean	Ct 1	Ct 2	Ct 3	Mean	Ct 1	Ct 2	Ct 3	Mean	Adenom	CRC	Death
P002	60-69	Tubular	Severe	Sigmoideum	36.76	38.17	39.63	38.1867	32.45	32.49	32.55	32.4967	34.68	35.6	36.51	35.5967	31.67	31.76	32.21	31.88	22.46	22.6	22.64	22.5667	3	-	-
P007	60-69	Tubular	Severe	Caecum	35.49	35.94	36.15	35.86	31.61	31.72	31.15	31.4933	28.69	28.53	28.56	28.5933	27.99	28.05	27.94	27.9933	22.44	22.41	22.57	22.4733	-	-	-
P022	70-79	Tubular	Moderate	Descendens	39.53	38.93	39.89	39.45	32.02	32.66	32.42	32.3667	33.96	34.11	34.37	34.1467	33.59	33.87	33.99	33.8167	23.7	23.44	23.56	23.5667	4	-	-
P027	50-59	Tubular	Moderate	Sigmoideum	38.82	40	40	39.6067	32.89	32.5	32.55	32.6467	32.68	32.32	31.84	32.28	32.68	32.76	32.87	32.77	23.44	23.22	23.52	23.3933	-	-	-
P028	70-79	Tubular	Severe	Sigmoideum	38.92	39.19	37.42	38.51	32.58	32.46	32.87	32.6367	34.92	35.31	33.94	34.7233	33.73	32.67	32.69	33.03	23.38	23.31	23.21	23.3	-	-	-
P037	80-89	Tubular	Moderate	Colon	40	40	40	40	32.01	31.12	31.38	31.5033	36.33	34.84	39.3	36.8233	34.13	33.87	34.71	34.2367	25.99	25.97	26.44	26.1333	-	-	13
P041	60-69	Tubular	Severe	Sigmoideum	37.44	39.41	36.92	37.9233	31.96	31.74	31.66	31.7867	33.43	32.38	33.33	33.0467	39.47	33.69	33.72	35.6267	26.13	26.18	26.67	26.3267	-	43	-
P048	80-89	Tubular	Severe	Sigmoideum	39.09	38.28	40	39.1233	33.18	32.83	32.69	32.9	36.17	38.26	36.39	36.94	32.97	32.87	33.18	33.0067	22.8	22.85	23.23	22.96	-	-	-
P073	70-79	Tubular	Moderate	Sigmoideum	37.35	35.49	37.52	36.7867	29.5	29.28	29.21	29.33	31.75	32.22	32.36	32.11	31.34	31.46	31.8	31.5333	27.09	26.9	26.92	26.97	-	-	36
P079	80-89	Tubular	Severe	Colon	39.35	38.89	38.71	38.9833	31.85	31.47	31.36	31.56	33.29	34.83	33.95	34.0233	32.22	32.45	32.76	32.4767	23.98	23.91	23.96	23.95	-	-	-
Positive
Negative
Negative. Ct are below threshold, but the melting curve reveal that signal are unspecific

## Sheet: Diverticula
Diverticulum
				S. gallolyticus spp.				S. gallolyticus subsp. gallolyticus				F. nucleatum				B. fragilis				B-actin				five year follow up (months following diagnosis)
Sample ID	Age	Location	Diverticulum/diverticulitis	Ct 1	Ct 2	Ct 3	Mean	Ct 1	Ct 2	Ct 3	Mean	Ct 1	Ct 2	Ct 3	Mean	Ct 1	Ct 2	Ct 3	Mean	Ct 1	Ct 2	Ct 3	Mean	Adenom	CRC	Death
U007	60-69	Caecum	Diverticulum	37	36.42	36.48	36.6333	30.46	30.01	29.85	30.1067	29.89	30.1	29.81	29.9333	29.43	29.14	29.32	29.2967	23.55	23.49	24.04	23.6933	-	-	-
U010	80-89	Sigmoideum	Diverticulum	36.49	36.07	35.05	35.87	29.92	30.04	28.8	29.5867	27.32	27.68	27.44	27.48	26.47	26.75	26.54	26.5867	22.85	23	23.01	22.9533	-	-	-
U017	70-79	Sigmoideum	Diverticulitis	35.57	36.05	36.57	36.0633	30.55	30.18	30.42	30.3833	29.5	29.9	29.52	29.64	27.56	27.62	27.61	27.5967	22.33	22.38	22.85	22.52	-	-	-
U019	80-89	Sigmoideum	Diverticulitis	35.9	35.76	35.58	35.7467	30.13	30.11	29.99	30.0767	28.22	28.1	28.23	28.1833	27.72	29.66	27.91	28.43	21.94	21.9	22.22	22.02	-	-	-
U031	60-69	Sigmoideum	Diverticulitis	37.87	37.82	36.4	37.3633	29.26	29.2	29.15	29.2033	32.76	32.07	30.56	31.7967	31.47	31.72	31.26	31.4833	27.06	27.04	27.45	27.1833	-	-	-
U068	40-49	Sigmoideum	Diverticulum	37.81	37.79	36.98	37.5267	30.19	30.21	30.35	30.25	34.97	34.93	30.43	33.4433	36.14	31.56	31.08	32.9267	23.5	23.72	24.01	23.7433	-	-	-
U072	40-49	Sigmoideum	Diverticulum	36.79	36.66	36.59	36.68	30.4	30.31	30.57	30.4267	27.78	28.08	27.91	27.9233	26.99	26.84	26.84	26.89	22.11	22.16	22.3	22.19	-	-	-
U076	70-79	Left colon	Diverticulum	35.47	37.15	37.25	36.6233	29.71	29.5	30	29.7367	32.44	32.49	32.71	32.5467	29.06	28.85	28.68	28.8633	23.97	23.87	24.34	24.06	-	-	-
U079	70-79	Sigmoideum	Diverticulitis	36.6	36.33	35.69	36.2067	29.93	29.89	29.67	29.83	24.97	25.14	25.13	25.08	26.41	26.63	26.42	26.4867	22.63	22.67	23.05	22.7833	-	-	1
U097	50-59	Sigmoideum	Diverticulitis	38.49	39.12	38.02	38.5433	32.61	31.9	31.99	32.1667	29.11	29.34	29.88	29.4433	28.22	28.16	28.2	28.1933	23.28	23.58	23.67	23.51	-	-	-
Positive
Negative
Negative. Ct are below threshold, but the melting curve reveal that signal are unspecific
