# Supplementary material for: The presence of bacteria varies between colorectal adenocarcinomas, precursor lesions and non-malignant tissue
Source: BMC Cancer. 2019 Apr 29;19:399. doi: 10.1186/s12885-019-5571-y (PMC6489238; doi:10.1186/s12885-019-5571-y)
Supplement: Supplementary file 3 — 16S rRNA gene sequencing metadata. Information describing the samples included for bioinformatics analysis of the 16S rRNA gene sequencing data. (XLSX 11 kb) [file 12885_2019_5571_MOESM3_ESM.xlsx]

## Sheet: Sheet1
SeqID	LibID	Person	SampleGroup	Age range	Cancer_stage	Adenoma	CRC	Death	Months	Location
MQ171106-136	LIB-K008T	K008	Tumor	60-69	4	no	no	no		Ascedens
MQ171106-137	LIB-K014T	K014	Tumor	50-59	2	no	21	no		Caecum
MQ171106-138	LIB-K016T	K016	Tumor	80-89	3	no	no	no		Transversum
MQ171106-139	LIB-K024T	K024	Tumor	70-79	3	no	no	no		Caecum
MQ171106-140	LIB-K042T	K042	Tumor	60-69	1	37	no	no		Transversum
MQ171106-141	LIB-K050T	K050	Tumor	80-89	2	no	no	no		Caecum
MQ171106-142	LIB-K056T	K056	Tumor	60-69	2	no	no	no		Ascedens
MQ171106-143	LIB-K074T	K074	Tumor	70-79	3	no	no	yes	18	Caecum
MQ171106-144	LIB-K084T	K084	Tumor	>90	3	no	no	yes	1	Ascedens
MQ171106-145	LIB-K096T	K096	Tumor	70-79	3	no	7	yes	9	Caecum
MQ171106-146	LIB-K008R	K008	Paired normal tissue	60-69	4	no	no	no		Ascedens
MQ171106-147	LIB-K014R	K014	Paired normal tissue	50-59	2	no	21	no		Caecum
MQ171106-148	LIB-K016R	K016	Paired normal tissue	80-89	3	no	no	no		Transversum
MQ171106-149	LIB-K024R	K024	Paired normal tissue	70-79	3	no	no	no		Caecum
MQ171106-150	LIB-K042R	K042	Paired normal tissue	60-69	1	37	no	no		Transversum
MQ171106-151	LIB-K050R	K050	Paired normal tissue	80-89	2	no	no	no		Caecum
MQ171106-152	LIB-K056R	K056	Paired normal tissue	60-69	2	no	no	no		Ascedens
MQ171106-153	LIB-K074R	K074	Paired normal tissue	70-79	3	no	no	yes	18	Caecum
MQ171106-154	LIB-K084R	K084	Paired normal tissue	>90	3	no	no	yes	1	Ascedens
MQ171106-155	LIB-K096R	K096	Paired normal tissue	70-79	3	no	7	yes	9	Caecum
MQ171106-156	LIB-negative	Negative1	Negative
MQ171106-157	LIB-positive	Positive1	Positive
MQ171106-158	LIB-P002	P002	Adenoma	60-69		3	no	no		Sigmoideum
MQ171106-159	LIB-P007	P007	Adenoma	60-69		no	no	no		Caecum
MQ171106-160	LIB-P022	P022	Adenoma	70-79		4	no	no		Descendens
MQ171106-161	LIB-P027	P027	Adenoma	50-59		no	no	yes	96	Sigmoideum
MQ171106-162	LIB-P028	P028	Adenoma	70-79		no	no	no		Sigmoideum
MQ171106-163	LIB-P037	P037	Adenoma	80-89		no	no	yes	13	Colon
MQ171106-164	LIB-P041	P041	Adenoma	60-69		no	43	no		Sigmoideum
MQ171106-165	LIB-P048	P048	Adenoma	80-89		no	no	no		Sigmoideum
MQ171106-166	LIB-P073	P073	Adenoma	70-79		no	no	yes	36	Sigmoideum
MQ171106-167	LIB-P079	P079	Adenoma	80-89		no	no	yes	63	Colon
MQ171106-168	LIB-U007	U007	Diverticula	60-69		no	no	no		Caecum
MQ171106-169	LIB-U010	U010	Diverticula	80-89		no	no	no		Sigmoideum
MQ171106-170	LIB-U017	U017	Diverticula	70-79		no	no	no		Sigmoideum
MQ171106-171	LIB-U019	U019	Diverticula	80-89		no	no	no		Sigmoideum
MQ171106-172	LIB-U031	U031	Diverticula	60-69		no	no	no		Sigmoideum
MQ171106-173	LIB-U068	U068	Diverticula	40-49		no	no	no		Sigmoideum
MQ171106-174	LIB-U072	U072	Diverticula	40-49		no	no	no		Sigmoideum
MQ171106-175	LIB-U076	U076	Diverticula	70-79		no	no	no		Left hemicolon
MQ171106-176	LIB-U079	U079	Diverticula	70-79		no	no	yes	1	Sigmoideum
MQ171106-177	LIB-U097	U097	Diverticula	50-59		115	no	no		Sigmoideum
MQ171106-178	LIB-positive2	Positive2	Positive
MQ171106-179	LIB-negative2	Negative2	Negative
