# Supplementary material for: The presence of bacteria varies between colorectal adenocarcinomas, precursor lesions and non-malignant tissue
Source: BMC Cancer. 2019 Apr 29;19:399. doi: 10.1186/s12885-019-5571-y (PMC6489238; doi:10.1186/s12885-019-5571-y)
Supplement: Supplementary file 4 — 16S rRNA gene sequences. FASTA file containing the DNA sequences generated using 16S rRNA gene sequencing. (FA 243 kb) [file 12885_2019_5571_MOESM4_ESM.fa]

>OTU_1
GGACTACTCGGGTTTCTAATCCTGTTTGATACCCACACTTTCGAGCCTCAATGTCAGTTGCAGCTTAGCAGGCTGCCTTC
GCAATCGGAGTTCTTCGTGATATCTAAGCATTTCACCGCTACACCACGAATTCCGCCTGCCTCAACTGCACTCAAGATAT
CCAGTATCAACTGCAATTTTACGGTTGAGCCGCAAACTTTCACAACTGACTTAAACATCCATCTACGCTCCCTTTAAACC
CAATAAATCCGGATAACGCTCGGATCCTCCGTATT
>OTU_2
GGACTACTGGGGTTTCTAATCCTGTTTGATACCCACACTTTCGAGCATCAGTGTCAGTTGCAGTCCAGTGAGCTGCCTTC
GCAATCGGAGTTCTTCGTGATATCTAAGCATTTCACCGCTACACCACGAATTCCGCCCACCTCTACTGTACTCAAGACTG
ACAGTATCAACTGCAATTTTACGGTTGAGCCGCAAACTTTCACAACTGACTTACCAGTCCACCTACGCTCCCTTTAAACC
CAATAAATCCGGATAACGCTCGGATCCTCCGTATT
>OTU_3
GGACTACCGGGGTTTCTAATCCTGTTTGATACCCACACTTTCGAGCATCAGCGTCAGTTACAGTCCAGCAGGCTGCCTTC
GCAATCGGAGTTCTTCGTGATATCTAAGCATTTCACCGCTACACCACGAATTCCGCCTGCCTCTACTGTACTCAAGACAC
CCAGTATCAACTGCAATTTTACGGTTGAGCCGCAAACTTTCACAACTGACTTAAGCGTCCGCCTACGCTCCCTTTAAACC
CAATAAATCCGGATAACGCTCGGATCCTCCGTATT
>OTU_4
GGACTACTCGGGTTTCTAATCCTGTTTGCTCCCCACGCTTTCGAGCCTCAGCGTCAGTTACAGTCCAGAGAATCGCCTTC
GCCACTGGTGTTCTTCCTAATCTCTACGCATTTCACCGCTACACTAGGAATTCCATTCTCCTCTCCTGCACTCTAGACTT
CCAGTTTGAAATGCAGCACCCAAGTTGAGCCCGGGTATTTCACATCTCACTTAAAAGTCCGCCTACGCTCCCTTTACGCC
CAGTAAATCCGGACAACGCTCGCCACCTACGTATT
>OTU_5
GGACTACCGGGGTTTCTAATCCTGTTTGCTCCCCATGCTTTCGTACCTCAGCGTCAGTATTAGGCCAGATGGCTGCCTTC
GCCATCGGTATTCCTCCAGATCTCTACGCATTTCACCGCTACACCTGGAATTCTACCATCCTCTCCCATACTCTAGCTTC
CCAGTATCGAATGCAATTCCTAAGTTAAGCTCAGGGATTTCACATCCGACTTAAAAAGCCGCCTACGCACGCTTTACGCC
CAGTAAATCCGATTAACGCTCGCACCCTCTGTATT
>OTU_6
GGACTACTGGGGTTTCTAATCCTGTTTGCTCCCCATGCTTTCGCACCTCAGCGTCAGTGTTAGGCCAGATGGCTGCCTTC
GCCATCGGTATTCCTCCAGATCTCTACGCATTTCACCGCTACACCTGGAATTCTACCATCCTCTCCCACACTCTAGCTAA
CCAGTATCGAATGCAATTCCCAAGTTAAGCTCGGGGATTTCACATTTGACTTAATTAGCCGCCTACGCGCGCTTTACGCC
CAGTAAATCCGATTAACGCTTGCACCCTCTGTATT
>OTU_7
GGACTACTGGGGTTTCTAATCCTGTTCGCTACCCATGCTTTCGAACCTCAGCGTCAGTTACAGACCAGAGAGCCGCTTTC
GCCACTGGTGTTCTTCCATATATCTACGCATTTCACCGCTACACATGGAGTTCCACTCTCCTCTTCTGCACTCAAGTCTT
CCAGTTTCCAATGCACATCTCCGGTTAAGCCGAAGGCTTTCACATCAGACTTAAAAAACCGCCTGCGTTCCCTTTACGCC
CAATAAATCCGGACAACGCTTGCCACCTACGTATT
>OTU_8
GGACTACCGGGGTTTCTAATCCTGTTTGCTACCCACGCTTTCGCGCTTTAGCGTCAGTATCTGTCCAGTAGGCTGGCTTC
CCCATCGGCATTCCTACAAATATCTACGAATTTCACCTCTACACTTGTAGTTCCGCCTACCTCTCCAGTACTCTAGTAAG
GCAGTTTCCAACGCCATACGGAGTTGAGCTCCGCATTTTCACATCAGACTTTCCTTGCCGCCTAGACGCGCTTTACGCCC
AATAAATCCGGATAACGCTTGCGACATACGTATTA
>OTU_9
GGACTACTCGGGTTTCTAATCCTGTTCGATACCCGCACTTTCGAGCTTCAGCGTCAGTTGCGCTCCAGTGAGCTGCCTTC
GCAATCGGAGTTCTTCGTGATATCTAAGCATTTCACCGCTACACCACGAATTCCGCCCACTTTGTGCGTACTCAAGGAAA
CCAGTTCGCGCTGCAGTGCAGATGTTGAGCATCTACATTTCACAACACGCTTAATCTCCGGCCTACGCTCCCTTTAAACC
CAATAAATCCGGATAACGCCCGGACCTTCCGTATT
>OTU_10
GGACTACTGGGGTTTCTAATCCTGTTTGATACCCACACTTTCGAGCATCAATGTCAGTTACAGGTTAGTAAGCTGCCTTC
GCAATCGGAGTTCTTCGTGATATCTAAGCATTTCACCGCTACACCACGAATTCCGCCTACCTCAACTGTACTCAAGACTG
CCAGTATCAATTGCAATTTTACGGTTGAGCCGCAAACTTTCACAACTGACTTAACAACCCATCTACGCTCCCTTTAAACC
CAATAAATCCGGATAACGCTCGGATCCTCCGTATT
>OTU_11
GGACTACTGGGGTTTCTAATCCCATTTGCTACCCTAGCTTTCGTCTCTCAGTGTTAGTAATAGCCCAGTAAAGTGCCTTC
GCCATCGGTGTTCTTTCCAATCTCTACGCATTTCACCGCTCCACTGGAAATTCCCTTTACCCCTACTATACTCTAGTCTA
ATAGTTTCGACTGCGATTTTGAGGTTAAGCCTCAAGATTTAACAGTTGACTTATTTGACCACCTACAGACGCTTTACGCC
CAGTGATTCCGGATAACACTTGCATCCTCCGTCTT
>OTU_12
GGACTACTCGGGTTTCTAATCCTGTTTGCTACCCACACTTTCGAGCCTCAGCGTCAGTTGGTGCCCAGTAGGCCGCCTTC
GCCACTGGTGTTCCTCCCGATATCTACGCATTCCACCGCTACACCGGGAATTCCGCCTACCTCTGCACTACTCAAGAAAA
ACAGTTTTGAAAGCAGTTTATGGGTTGAGCCCATAGATTTCACTTCCAACTTGTCTTCCCGCCTGCGCTCCCTTTACACC
CAGTAATTCCGGACAACGCTTGTGACCTACGTTTT
>OTU_13
GGACTACTCGGGTTTCTAATCCTGTTTGCTCCCCACGCTTTCGTGCCTCAGCGTCAGTTACAGTCCAGAGAGCCGCCTTC
GCTACTGGTGTTCCTCCTAATATCTACGCATTTCACCGCTACACTAGGAATTCCACTCTCCTCTCCTGCACTCAAGTCCT
CCAGTTTCAAGAGCTTACTACGGTTGAGCCGTAGCCTTTCACTCCTGACTTAAAAGACCGCCTACGCACCCTTTACGCCC
AGTAAATCCGGATAACGCTAGCCCCCTACGTATTA
>OTU_14
GGACTACTGGGGTTTCTAATCCTGTTTGCTCCCCACGCTTTCGTGCCTCAACGTCAGATATAGTTTGGTAAGCTGCCTTC
GCAATCGGTGTTCTGTATGATCTCTAAGCATTTCACCGCTACACCATACATTCCGCCTACCGCAACTACTCTCTAGTCTA
ACAGTATTAGAGGCAGTTCCGGAGTTAAGCCCCGGGATTTCACCTCTAACTTATCAAACCGCCTACGCACCCTTTAAACC
CAATAAATCCGGATAACGCTTGAATCCTCCGTATT
>OTU_15
GGACTACTGGGGTTTCTAATCCTGTTTGCTCCCCACGCTTTCGCACCTCAGTGTCAGTGTTGGTCCAGGTAGCCGCCTTC
GCCACTGGTGTTCCTTCCTATATCTACGCATTTCACCGCTACACAGGAAATTCCACTACCCTCTACCACACTCTAGTCTG
ACAGTTCGAAATGCCGTTCCCAGGTTAAGCCCGGGGCTTTCACATCTCGCTTACCAAACCACCTACGCGTGCTTTACGCC
CAGTAATTCCGATTAACGCTTGCACCCTCCGTATT
>OTU_16
GGACTACTCGGGTTTCTAATCCTGTTTGCTACCCATGCTTTCGAGCCTCAGCGTCAGTTGGTGCCCAGTAGGTCGCCTTC
GCCACTGGTGTTCCTCCCGATATCTACGCATTCCACCGCTACACCGGGAATTCCACCTACCTCTGCACTACTCAAGGCCA
GCAGTTTTGAAAGCAATTTATGGGTTGAGCCCATAGTTTTCACTTCCAACTTGCCGGTCCGCCTGCGCTCCCTTTACACC
CAGTAATTCCGGACAACGCTTGCACCCTACGTTTT
>OTU_17
GGACTACTCGGGTTTCTAATCCTGTTCGCTCCCCACGCTTTCGTCCATCAGCGTCAATCCACTTGTAGTAACCTGCCTTC
GCAATTGGTATTCCATGTAATCTCTAAGCATTTCACCGCTACACTACATATTCTAGTTACTTCCAAGTAATTCAAGTCTT
ACAGTATCAATGGCCGTTTGATCGTTGAGCGACCAGATTTCACCACTGACTTATAAAACCGCCTACGGACCCTTTAAACC
CAATGATTCCGGATAACGCTTGGATCCTCCGTATT
>OTU_18
GGACTACCGGGGTTTCTAATCCTGTTTGATACCCACACTTTCGAGCATCAGCGTCAGTTACACTCCAGTGAGCTGCCTTC
GCAATCGGAGTTCTTCGTGATATCTAAGCATTTCACCGCTACACCACGAATTCCGCCCACCTCTACTGCACTCAAGACTG
CCAGTATCAACTGCAATTTTACGGTTGAGCCGCAAACTTTCACAACTGACTTAACAATCCGCCTACGCTCCCTTTAAACC
CAATAAATCCGGATAACGCTCGGATCCTCCGTATT
>OTU_19
GGACTACTCGGGTTTCTAATCCTGTTTGCTCCCCACGCTTTCGTGCCTCAGTGTCAGTTACAGTCCAGAGAGCCGCCTTC
GCAACTGGTGTTCCTCCTAATATCTACGCATTTCACCGCTACACTAGGAATTCCACTCTCCTCTCCTGCACTCAAGTTTC
CCAGTTTCAAAGGCTTACTACGGTTGAGCCGTAGCCTTTCACCTCTGACTTAAGAAACCACCTACGCACCCTTTACGCCC
AGTAATTCCGGATAACGCTAGCCCCCTACGTATTA
>OTU_20
GGACTACCAGGGTTTCTAATCCTGTTCGATACCCGCACTTTCGAGCTTCAGCGTCAGTTGCGCTCCCGTGAGCTGCCTTC
GCAATCGGAGTTCTTCGTGATATCTAAGCATTTCACCGCTACACCACGAATTCCGCCCACGTTGTGCGTACTCAAGAAGA
CCAGTTCGCGCTGCAGTGCAGAGGTTGAGCCACTACATTTCACAACACGCTTAATCTCCGGCCTACGCTCCCTTTAAACC
CAATAAATCCGGATAACGCCCGGACCTTCCGTATT
>OTU_21
GGACTACCGGGGTTTCTAATCCTGTTTGATCCCCACGCTTTCGTGCATCAGCGTCAGTCATGGCTTGGCAGGCTGCCTTC
GCAATCGGGGTTCTGCGTGATATCTAAGCATTTCACCGCTACACCACGCATTCCGCCTGCCTCAAACATACTCAAGCCCC
CCAGTTTCAACGGCAATTCTATGGTTGAGCCACAGACTTTCACCGCTGACTTAAAAGGCCGCCTACGCACCCTTTAAACC
CAATAAATCCGGATAACGCTCGGATCCTCCGTATT
>OTU_22
GGACTACTGGGGTTTCTAATCCTGTTTGCTCCCCACGCTTTCGAGCATGAGCGTCAGTATTAGGCCAGGAGGCTGCCTTC
GCCATTGGTATTCCTCCACATCTCTACGCATTTCACTGCTACACGTGGAATTCTACCTCCCTCTCCCATACTCTAGCCTT
GTAGTTTCAAACGCAGTTCCCAGGCTGAGCCCGGGGCTTTCACATCTGACTTACAAAACCGCCTGCGCTCGCTTTACGCC
CAGTAATTCCGATTAACGCTTGCACCCTACGTATT
>OTU_23
GGACTACCGGGGTTTCTAATCCCGTTCGCTACCCTAGCTTTCGTGCCTCAGCGTCAGTTGTGGACCAGAGAGCCGCCTTC
GCCACCGGTGTTCCTCCTGATATCTACGCATTTCACCGCTCCACCAGGAGTTCCGCTCTCCCCTACCACACTCTAGCAAT
ACAGTTTGCCGGGCAGTTCCACGGGTGAGCCGTGGGATTTCACCTGACACTTGTATCACCGCCTACGCACGCTTTAAGCC
CAGTAATTCCGAACAACGTTCGCACTCTCTGTATT
>OTU_24
GGACTACTGGGGTTTCTAATCCTGTTTGATACCCGCACTTTCGAGCCTCAGCGTCAGTTGCACCCCGGATGCCTGCCTTC
GCGATCGGAGTTCTTCATGATATCTGAGCATTTCACCGCTACACCATGAATTCCAGCATCCCTGTGTGCACTCAAGACCT
CCAGTATCAACTGCAGTTCGACGGTTGAGCCGCCGTATTTCACAGCTGACTTAAAGGTCCGCCTGCGCTCCCTTTAAACC
CAATAAATCCGGATAACGCCCGGACCTTCCGTATT
>OTU_25
GGACTACCGGGGTTTCTAATCCTGTTCGATACCCGCACCTTCGAGCTTAAGCGTCAGTAACACTCCCGCAGGCTGCCTTC
GCGATCGGAGTTCCTCATGATATCTAAGCATTTCACCGCTACACCATGAATTCCGCCTGCGCTGCGTGTACTCAAGTCTG
ACAGTTCGCGCTGCAAGTTAAATGTTGAGCACCTAAATTTCACAACACGCTTAACAGACCGCCTACACTCCCTTTAAACC
CAATAAATCCGGATAACGCCCGGACCTTCCGTATT
>OTU_26
GGACTACTGGGGTTTCTAATCCTGTTTGCTACCCACGCTTTCGAATCTCAGTGTCAATATTATGCCAGGAAGCTGCCTTC
GCCATCGGTATTCCTCCAGATCTCTACGCATTTCACCGCTACACCTGGAATTCTACTTCCCTCTCACATATTCTAGCACC
ACCAGTATCACATGCAGTTCCCAGGTTAAGCCCGGGGATTTCACATGTGACTTAATGAGCCACCTACACTCGCTTTACGC
CCAGTAATTCCGATTAACGCTCGCACCCTCTGTAT
>OTU_27
GGACTACTGGGGTTTCTAATCCTGTTTGATCCCCACGCTTTCGCACATCAGCGTCAGTTACAGACCAGAAAGTCGCCTTC
GCCACTGGTGTTCCTCCATATCTCTGCGCATTTCACCGCTACACATGGAATTCCACTTTCCTCTTCTGCACTCAAGTTTT
CCAGTTTCCAATGACCCTCCACGGTTGAGCCGTGGGCTTTCACATCAGACTTAAAAAACCGCCTACGCGCGCTTTACGCC
CAATAATTCCGGATAACGCTTGCCACCTACGTATT
>OTU_28
GGACTACCGGGGTTTCTAATCCCTTTCGCTCCCCTGGCCTTCGTGCCTCAGCGTCAGTTAATGTCCAGGAACCCGCCTTC
GCCACGAGTGTTCCTCTCGATATCTACGCATTTCACTGCTACACCGAGAATTCCGGTTCCCCCTCCATTACTCTAGTCTC
GCAGTATCATGTGCCGTCCGCGGGTTGAGCCCGCGCCTTTCACACACGACTTACGAAACAGCCTACGCACGCTTTACGCC
CAGTGATTCCGAACAACGCTTGAGACCTCTGTATT
>OTU_29
GGACTACCGGGGTTTCTAATCCTGTTTGCTCCCCACACTTTCGTGCCTCAACGTCAGTTACAGTCCAGAAAGTCGCCTTC
GCCACTGGTGTTCCTCCTAATATCTACGCATTTCACCGCTACACTAGGAATTCCACTTTCCTCTCCTGCACTCAAGAAAA
ATAGTTTTAGTTGCAGTTCCTCAGTTAAGCCGAGGGATTTCACAACTAACTTATTCTCCCGTCTACGCACCCTTTACACC
CAATAAATCCGGATAACGCTCGCTCCCTACGTATT
>OTU_30
GGACTACTCGGGTTTCTAATCCTGTTCGATACCCACGCTTTCGAGCTTCAGCGTCAGTTGCACTACAGCAGGCTGCCTTC
GCAATCGGAGTTCTTCGTCATATCTAAGCATTTCACCGCTACACGACGAATTCCGCCTACTTCCTGTACACTCAAGTCTG
CCAGTTCGCGCTGCAATGCCCAGGTTGAGCCCCGACATTTCACAACACGCTTAACAGACGGCCTACGCTCCCTTTAAACC
CAATAAATCCGGATAACGCCCGGACCTTCCGTATT
>OTU_31
GGACTACTCGGGTTTCTAATCCTGTTCGCTCCCCACGCTTTCGTGCCTCAGCGTCAATAACAGTCCAGTAAGTCGCCTTC
GCCACTGGTGTTCCTCCTAATATCTACGCATTTCACCGCTACACTAGGAATTCCACTTACCTCTCCTGCATTCAAGCCTA
GCAGCTTCAAGAGCTTACAATGGTTGAGCCATTGCCTTTCACTCCTGACTTGCCAAGCCGCCTACGCACCCTTTACGCCC
AGTGATTCCGGATAACGCTTGCACCCTACGTATTA
>OTU_32
GGACTACTCGGGTTTCTAATCCTGTTTGCTCCCCACGCTTTCGAGCCTCAGCGTCAGTTACAAGCCAGAGAGCCGCTTTC
GCCACCGGTGTTCCTCCATATATCTACGCATTTCACCGCTACACATGGAATTCCACTCTCCCCTCTTGCACTCAAGTTAA
ACAGTTTCCAAAGCGTACTATGGTTAAGCCACAGCCTTTAACTTCAGACTTATCTAACCGCCTGCGCTCGCTTTACGCCC
AATAAATCCGGACAACGCTCGGGACCTACGTATTA
>OTU_33
GGACTACTCGGGTTTCTAATCCTGTTTGCTACCCATGCTTTCGAGCCTCAGCGTCAGTTGGTGCCCAGTAGACCGCCTTC
GCCACTGGTGTTCCTCCCGATATCTACGCATTCCACCGCTACACCGGGAATTCCATCTACCTCTGCACTACTCAAGAAAA
ACAGTTTTGAAAGCAATTCATGGGTTGAGCCCATGGTTTTCACTTCCAACTTGTCTTCCCGCCTGCGCTCCCTTTACACC
CAGTAATTCCGGACAACGCTTGCACCCTACGTTTT
>OTU_34
GGACTACCGGGGTTTCTAATCCTGTTTGCTCCCCACACTTTCGTGCCTCAATGTCAGTTATCGTCCAGAAAGTCGCCTTC
GCCACTGGTGTTCCTCCTAATATCTACGCATTTCACCGCTACACTAGGAATTCCACTTTCCTCTCCGACACTCAAGGGAA
GTAGTTTTGGTTGCAGTTCCTCAGTTGAGCCGAGGGATTTCACAACCAACTTGACTTCCCGTCTACGCACCCTTTACACC
CAATAAATCCGGATAACGCTTGCTCCCTACGTATT
>OTU_35
GGACTACCGGGGTTTCTAATCCTGTTTGCTCCCCACGCTTTCGTGCATGAGCGTCAGTGCAGACCCAGGGGATTGCCTTC
GCCATCGGTGTTCCTCCGCATATCTACGCATTTCACTGCTACACGCGGAATTCCATCCCCCTCTGCCGCACTCCAGCGAT
GCAGTCACAAAGGCAGTTCCCAGGTTGAGCCCGGGGATTTCACCTCTGTCTTACATCACCGCCTGCGCACGCTTTACGCC
CAGTAATTCCGATTAACGCTTGCACCCTACGTATT
>OTU_36
GGACTACTGGGGTTTCTAATCCTGTTTGCTCCCCACGCTTTCGAGCCTCAACGTCAGTTACCGTCCAGTAAGCCGCCTTC
GCCACTGGTGTTCCTCCTAATATCTACGCATTTCACCGCTACACTAGGAATTCCGCTTACCCCTCCGGCACTCAAGTATG
ACAGTTTCCAATGCAGTCCACAGGTTGAGCCCATGCCTTTCACATCAGACTTGCCACACCGTCTACGCTCCCTTTACACC
CAGTAAATCCGGATAACGCTTGCCCCCTACGTATT
>OTU_37
GGACTACACGGGTTTCTAATCCTGTTTGATACCCACACTTTCGAGCATCAGTGTCAGTGACAGTCTAGTGAGCTGCCTTC
GCAATCGGAGTTCTTCGTGATATCTAAGCATTTCACCGCTACACCACGAATTCCGCCCACCTCTACTGTACTCAAGACTG
CCAGTTTCAACTGCAATTTTACGGTTGAGCCGCAAACTTTCACAACTGACTTAACAATCCACCTACGCTCCCTTTAAACC
CAATAAATCCGGATAACGCTCGGATCCTCCGTATT
>OTU_38
GGACTACTCGGGTTTCTAATCCTGTTTGCTCCCCACGCTTTCGAGCCTCAGCGTCAGTTACAGACCAGAAAGCCGCCTTC
GCCACTGGTGTTCCTCCATATATCTACGCATTTCACCGCTACACATGGAATTCCGCTTTCCTCTTCTGCACTCAAGTCTC
CCAGTTTCCAATGACCCTCCCCGGTTAAGCCGGGGGCTTTCACATCAGACTTAAAAGACCGCCTGCGCTCGCTTTACGCC
CAATAAATCCGGACAACGCTTGCCACCTACGTATT
>OTU_39
GGACTACTCGGGTTTCTAATCCTGTTCGATCCCCACGCTTTCGTGCATCAGCGTCAGTAATGGTCCAGCAAGCTGCCTTC
GCAATCGGTGTTCTGTGTAATATCTAAGCATTTCACCGCTACATTACACATTCCGCCTACCTTGACCACACTCAAGACCA
ACAGTATCAAAGGCACGTCTACAGTTAAGCTGCAGGGTTTCACCTCTGACTTATTGATCCGCCTACGCACCCTTTAAACC
CAATAAATCCGGATAACGCTCGCATCCTCCGTATT
>OTU_40
GGACTACTCGGGTTTCTAATCCTGTTTGCTACCCACGCTTTCGCGCTTTAGCGTCAGTATCTGTCCAGTAAGCTGGCTTC
CCCATCGGCATTCCTACAAATATCTACGAATTTCACCTCTACACTTGTAGTTCCGCTTACCTCTCCAGTACTCTAGTTAT
ACAGTTTCCAACGCAATACAGAGTTGAGCCCTGCATTTTCACATCAGACTTACATAACCACCTAGACGCGCTTTACGCCC
AATAAATCCGGATAACGCTCGTGACATACGTATTA
>OTU_41
GGACTACTCGGGTTTCTAATCCTGTTTGCTACCCACGCTTTCGTGCCTCAGTATCAGTAATGGTCCAGAACGCCGTCTAC
ACCTCAGGTGTTCCTCCTGATATCTACGCATTTCACCGCTACACCAGGAATTCCACGTTCCTCTCCCACACTCTAGCCAG
CCAGTTTTCGGCGCACCCTCCCAGTTAAGCCGGGAGATTTCACACCAAACCTAGCCAACCACCTACGCACTCTTTACGCC
CAGTAATTCCGAACAACGCTCGCTGCCTACGTATT
>OTU_42
GGACTACTCGGGTTTCTAATCCTGTTTGCTCCCCACGCTTTCGCGCCTCAGCGTCAGTTACAGACCAGAGAGCCGCCTTC
GCCACTGGTGTTCCTCCACATCTCTACGCATTTCACCGCTACACGTGGAATTCCGCTCTCCTCTTCTGCACTCAAGTCCC
CCAGTTTCCAATGACCCTCCACGGTTGAGCCGTGGGCTTTCACATCAGACTTAAGGAACCGCCTGCGCGCGCTTTACGCC
CAATAATTCCGGACAACGCTTGCCACCTACGTATT
>OTU_43
GGACTACTCGGGTTTCTAATCCTGTTTGCTCCCCACGCTTTCGAGCCTCAGTGTCAGTTACTGTCCAGTAAGCCGCCTTC
GCCACTGGTGTTCCTCCTAATATCTACGCATTTCACCGCTACACTAGGAATTCCACTTACCTCTCCAGCACTCAAGTCCG
ACAGTTTCCAATGCAGTCCCGGGGTTGAGCCCCGGGCTTTCACATCAGACTTGCCGAACCACCTACGCTCCCTTTACACC
CAGTAAATCCGGATAACGCTTGCCCCCTACGTATT
>OTU_44
GGACTACCGGGGTTTCTAATCCTGTTTGCTCCCCACGCTTTCGAGCCTCAGCGTCAGTTACAGTCCAGAGAGTCGCCTTC
GCCACTGGTGTTCTTCCTAATCTCTACGCATTTCACCGCTACACTAGGAATTCCACTTTCCTCTCCAGCACTCAAGAAAA
TCAGTTTTAGTTGCAGTTCCTCAGTTGAGCCGAGGGATTTCACAACTAACTTAATTTCCCGTCTACGCACCCTTTACACC
CAATAAATCCGGATAACGCTTGCTCCCTACGTATT
>OTU_45
GGACTACTGGGGTTTCTAATCCTGTTTGCTCCCCATGCTTTCGAGCCTCAGCGTCAGTAAAGGCCCAGCAAGCCGCCTTC
GCCACTGGTGTTCCTCCTAATATCTACGCATTTCACCGCTACACTAGGAATTCCACTTACCCCTCCGACACTCCAGTCCT
ACAGTTTCCAATGCAGTCCCGCGGTTGAGCCCCGGGCTTTCACATCAGACTTATAGCACCGCCTACGCTCCCTTTACACC
CAGTAAATCCGGATAACGCTTGCTCCATACGTATT
>OTU_46
GGACTACTCGGGTTTCTAATCCTGTTTGCTCCCCACGCTTTCGCGCCTCAGTGTCAGTTACAGGCCAAAAAGCCGCCTTC
GCCACTGGTGTTCCTCCTAATCTCTACGCATTTCACCGCTACACTAGGAATTCCACTTTTCTCTCCTGCACTCAAGTTTA
ACAGTTTCCAATGACCCTCCACGGTTGAGCCGTGGGCTTTCACATCAGACTTATTAAACCACCTGCGCGCGCTTTACGCC
CAATAATTCCGGACAACGCTTGCCACCTACGTATT
>OTU_47
GGACTACTCGGGTTTCTAATCCTGTTTGCTCCCCACGCTTTCGAGCCTCAACGTCAGTGTTATCCCAGGAGGCTGCCTTC
GCCATCGGTATTCCTCCACATCTCTACGCATTCCACCGCTACATGTGGAATTCTACCTCCCTCTGACACACTCTAGTCAC
CCAGTTCCAAATGCACGTCCCAAGTTAAGCTTGGGGATTTCACATCTGGCTTAAGTAACCGTCTGCACTCGCTTTACGCC
CAATAATTCCGATTAACGCTTGCACCCTACGTATT
>OTU_48
GGACTACTGGGGTTTCTAATCCTGTTTGCTCCCCACGCTTTCGAGCCTCAGCGTCAGTTACAGTCCAGAGAGTCGCCTTC
GCCACTGGTGTTCTTCCTAATCTCTACGCATTTCACCGCTACACTAGGAATTCCACTCTCCTCTCCTGCACTCTAGATAA
CCAGTTTGGAATGCAGCACCCAAGTTGAGCCCGGGTATTTCACATCCCACTTAATCATCCGCCTACGCTCCCTTTACGCC
CAGTAAATCCGGATAACGCTCGCCACCTACGTATT
>OTU_49
GGACTACTCGGGTTTCTAATCCTGTTTGCTCCCCACGCTTTCGCGCCTCAGTGTCAGTTACAGACCAGGAAGCCGCCTTC
GCCACTGGTGTTCCTCCATATCTCTACGCATTTCACCGCTACACATGGAATTCCACTTCCCTCTTCTGCACTCAAGTTGA
CCAGTTTCCAATGACCCTCCACGGTTAAGCCGTGGGCTTTCACATCAGACTTAATCAACCACCTGCGCGCTCTTTACGCC
CAATAATTCCGGATAACGCTCGCCACCTACGTATT
>OTU_50
GGACTACCGGGGTTTCTAATCCTGTTTGCTCCCCACGCTTTCGTGCATGAGCGTCAGTACAGGTCCAGGGGATTGCCTTC
GCCATCGGTGTTCCTCCGCATATCTACGCATTTCACTGCTACACGCGGAATTCCATCCCCCTCTACCGTACTCTAGCCAT
GCAGTCACAAATGCAGTTCCCAGGTTGAGCCCGGGGATTTCACATCTGTCTTGCAAAGCCGCCTGCGCACGCTTTACGCC
CAGTAATTCCGATTAACGCTTGCACCCTACGTATT
>OTU_51
GGACTACTCGGGTTTCTAATCCTGTTTGCTCCCCACGCTTTCGAGCCTCAACGTCAGTTACAGTCCAGTAAGCCGCCTTC
GCCACTGGTGTTCCTCCTAATATCTACGCATTTCACCGCTACACTAGGAATTCCGCTTACCTCTCCTGCACTCCAGCTCC
ACAGTTTCAAAAGCAGTTCCGGGGTTGAGCCCCGGATTTTCACTTCTGACTTGTGATGCCGTCTACGCTCCCTTTACACC
CAGTAAATCCGGATAACGCTTGCCCCCTACGTATT
>OTU_52
GGACTACCGGGGTTTCTAATCCCTTTTGCTCCCCACGCTTTCGTGCATGAGCGTCAGATCTTGTCCAGACAGCTGCCTTC
GCCATTGGTATTCCTTCTGATATCTACGCATTTCACCGCTACACCAGAAATTCTGCTGTCCCCTCCAAGCCTCTAGTAAT
GCAGTTTCAGGCGCACTTCCGGAGTTAAGCCCCGGGATTTCACACCTGACATACATCACCGCCTGCGCACCCTTTACGCC
CAGTGAATCCGAGTAACGCTCGCAGTCTCCGTATT
>OTU_53
GGACTACTGGGGTTTCTAATCCTGTTTGCTCCCCACGCTTTCGTCTCTCAGTGTCAGGCCTGTTCCAGGAAGCCGCCTTC
GCCACCGGCCTTCCTTCTGATATCTACGCATTTCACCGCTACACCAGAAATTCCGCTTCCCTCTCCCAGCCTCCAGTCTG
CCAGTCTCTTTGGCATTCCCATAGTTAAGCTACGGCCTTTCACCAAAGACTTGACAAACCACCTACAGACTCTTTACGCC
CAGTAATTCCGGATAACGCTTGCAGCCTACGTATT
>OTU_54
GGACTACCGGGGTTTCTAATCCTGTTCGCTACCCACGCTCTCGTGCATCAGCGTCAGTTACAGTCTGGTAAGCTGCCTTC
GCTATCGGAGTTCTAAGTTATATCTATGCATTTCACCGCTACTTAACTTATTCCGCCTACCTCGTCTGTACTCCAGTTTA
CCAGTATTAATGGCACAATTGAGTTTAGCTCAAATATTTAACCACTAACTTAATAAACCGCCTACGCACCCTTTAAACCC
AATAAATCCGGATAACGCTCGCATCCTCCGTATTA
>OTU_55
GGACTACTGGGGTTTCTAATCCTGTTTGCTCCCCACGCTTTCGCACCTGAGCGTCAGTCTTCGTCCAGGGGGCCGCCTTC
GCCACCGGTATTCCTCCAGATCTCTACGCATTTCACCGCTACACCTGGAATTCTACCCCCCTCTACGAGACTCAAGCTTG
CCAGTATCAGATGCAGTTCCCAGGTTGAGCCCGGGGATTTCACATCTGACTTAACAAACCGCCTGCGTGCGCTTTACGCC
CAGTAATTCCGATTAACGCTTGCACCCTCCGTATT
>OTU_56
GGACTACTGGGGTTTCTAATCCTGTTTGCTCCCCACGCTTTCGAGCCTCAACGTCAGTTACTGTCCAGTAAGCCGCCTTC
GCCACTGGTGTTCCTCCTAATATCTACGCATTTCACCGCTACACTAGGAATTCCACTTACCTCTCCAGCACTCTAGCAGA
ACAGTTTCCAAAGCAGTCCCGGGGTTGAGCCCCGGGCTTTCACTTCAGACTTGCTCCGCCGTCTACGCTCCCTTTACACC
CAGTAAATCCGGATAACGCTTGCCCCCTACGTATT
>OTU_57
GGACTACCGGGGTTTCTAATCCTGTTTGCTCCCCACGCTTTCGAGCCTCAGCGTCAGTGTCAGTCCAGAAAGCCGCCTTC
GCCACTGGTGTTCCTCCTAATATCTACGCATTTCACCGCTACACTAGGAATTCCGCTTCCCTCTCCTGTACTCTAAGTCA
ACCAGTATTAGATGCAGTCCCCAAGTTAAGCCCGGGGGTTTCACATCTAACTTAATCGACCGCCTACGCTCCCTTTACGC
CCAGTAATTCCGGACAACGCTCGCCCCCTACGTAT
>OTU_58
GGACTACCGGGGTTTCTAATCCCGTTCGCTGCCCTGGCTTTCGCACATGAGCGTCAGTTGTGTGCCAGGAAGCCGCCTTC
GCCACTGGTGTTCCTCCCGATATCTACGCATTTCACCGCTACACCGGGAATTCCACTTCCCTCTCACATACTCTAGACCC
GCAGTATCTATCGTGGAACGAAGGTTGAGCCTCCGCCTTTGACGACAGACTTACTGGTCCGCCTGCGTGCGCTTTACGCC
CAGTAATTCCGAACAACGCTCGCCCCCTACGTATT
>OTU_59
GGACTACCGGGGTTTCTAATCCCGTTCGCTCCCCTGGCTTTCGCATCTCAGCGTCAGTGTCAGGATAGAGAGCCGCTTAC
GCCGCTGGTGTTCTTCTCGATATCTACGCATTTCACCGCTACACCGAGAATTCCGCTCTCTTCCCCTGCACTCAAGCCTT
GCAGTTACGAATGCCGTTCCATCTTTGAGTAATGGGATTTCACATCCGACTTGCAAAGCCGCCTACATGCCCTTTACGCC
CAATGATTCCGAACAACGCTCGCTCCCTCCGTATT
>OTU_60
GGACTACCGGGGTTTCTAATCCTGTTTGCTCCCCACGCTTTCGAGCCTCAGCGTCAGTTACAGTCCAGAGAAGCGCCTTC
GCCACTGGTGTTCTTCCTAATCTCTACGCATTTCACCGCTACACTAGGAATTCCCTTCTCCTCTCCTGCACTCTAGACTT
CCAGTTTGAAATGCAGCACTCAGGTTAAGCCCGAGTATTTCACATCTCACTTAAAAATCCGCCTACGCTCCCTTTACGCC
CAGTAAATCCGGACAACGCTCGCCACCTACGTATT
>OTU_61
GGACTACTGGGGTTTCTAATCCCATTTGCTCCCCTCGCTTTCGTCTCTCAGTGTCAGTTAAGGCCCAGCAGAGTGCTTTC
GCCTTTGGTGTTCCTCCCGATCTCTACGCATTTCACCGCTCCACCGGGAATTCCCTCTGCCCCTACCGAACTCTAGTCTA
CTAGTTTCTCCTGCCTGCCCAGAGTTAAGCCCTGATCTTTGACAGAAGACTTGATAAACCACCTACAGACGCTTTACGCC
CAATCATTCCGGATAACGCTTGCATCCTCTGTATT
>OTU_62
GGACTACTAGGGTTTCTAATCCTGTTTGATCCCCACGCTTTCGTGCTTCAGTGTCAGTTATGGTTTAGTAAGCTGCCTTC
GCAATCGGAGTTCTGCGTGATATCTATGCATTTCACCGCTACACCACGCATTCCGCCTACCTCAAACACACTCAAGTAAC
CCAGTTTCAACGGCAATTTTATGGTTGAGCCACAAACTTTCACCGCTGACTTAAATCACCACCTACGCACCCTTTAAACC
CAATAAATCCGGATAACGCTCGCATCCTCCGTATT
>OTU_63
GGACTACTGGGGTTTCTAATCCTGTTTGATCCCCACGCTTTCGTGCCTCAGCGTCAATAGTGGTTTTGTGAGCTGCCTTC
GCAATCGGTGTTCTATGACATATCTAAGCATTTCACCGCTACATGTCATATTCCGCCCACATCAAACACATTCAAGATCG
ACAGTATCAATGGCAGTTCCAACGTTAAGCGTTGGGCTTTCACCACTGACTTATCAACCCGCCTACGCACCCTTTAAACC
CAATGAATCCGGATAACGCTTGGGTCCTTCGTCTT
>OTU_64
GGACTACCGGGGTTTCTAATCCTGTTCGATACCCACGCTTTCGTGCCTGAGCGTCAGTTGGGCGCCGGTATGCTGCCTTC
GCAATCGGAGTTCTACGTGATATCTATGCATTTCACCGCTACACCACGCATTCCGCATACTTCTCGCCCACTCTAGACCG
ACAGTTTCAACGGCTGGAAGGAGTTGAGCTCCTCGATTTTACCGCTGACTTTCCGGTCCGCCTGCGCACCCTTTAAACCC
AATAAATCCGAATAACGCTCGCATCCTCCGTATTA
>OTU_65
GGACTACTCGGGTTTCTAATCCTGTTCGCTCCCCACGCTTTCGTCCCTCAGCGTCAGTTATATCTTGGTAACCTGCCTTC
GCAATTGGTGTTCTAAGTAATATCTATGCATTTCACCGCTACACTACTTATTCCAGCTACCTCAAATATACTCAAGACTT
ACAGTATCAATGGCAGTTCTATCGTTAAGCGACAGGCTTTCACCACTGACTTATAAGTCCGCCTACGGACCCTTTAAACC
CAATAAATCCGGATAACGCTTGCACCCTCCGTATT
>OTU_66
GGACTACTCGGGTTTCTAATCCTGTTTGCTCCCCACGCTTTCGTGCCTCAGTGTCAGTTTCAGTCCAGTAAGCCGCCTTC
GCCACTGATGTTCCTCCTAATATCTACGCATTTCACCGCTACACTAGGAATTCCGCTTACCTCTCCTGCACTCCAGTCTG
ACAGTTTCAAAAGCAGTCCCAGAGTTAAGCCCTGGGTTTTCACTTCTGACTTGCCATACCACCTACGCACCCTTTACACC
CAGTAATTCCGGATAACGCTTGCCCCCTACGTATT
>OTU_67
GGACTACTGGGGTTTCTAATCCTGTTTGCTCCCCACGCTTTCGTGCATGAGCGTCAGTACAGGCCCAGGGGATTGCCTTC
GCCATCGGTGTTCCTCCGCATATCTACGCATTTCACTGCTACACGCGGAATTCCATCCCCCTCTGCCGTACTCTAGCTAT
ACAGTCACAAATGCAGTTCCCAGGTTGAGCCCGGGGATTTCACATCTGTCTTATATAACCGCCTGCGCACGCTTTACGCC
CAGTAATTCCGATTAACGCTTGCACCCTACGTATT
>OTU_68
GGACTACCGGGGTTTCTAATCCTGTTTGCTCCCCACGCTTTCGCACCTCAGCGTCAATACTTGTCCAGTCAGTCGCCTTC
GCCACTGGTGTTCTTCCGAATATCTACGAATTTCACCTCTACACTCGGAATTCCACTGACCTCTCCAAGATTCTAGCTAC
CTAGTTTCAAAGGCAGTTCCGGGGTTGAGCCCCGGGCTTTCACCTCTGACTTGAGTAGCCGCCTACGTGCGCTTTACGCC
CAGTAATTCCGAACAACGCTAGCTCCCTCCGTATT
>OTU_69
GGACTACCCGGGTATCTAATCCTGTTTGCTCCCCATGCTTTCGCACCTCAGTGTCAGTATTAGGCCAGATGGCTGCCTTC
GCCATCGGTATTCCTCCAGATCTCTACGCATTTCACCGCTACACCTGGAATTCTACCATCCTCTCCCATACTCTAGCCAA
CCAGTATCGAATGCAATTCCCAAGTTAAGCTCGGGGATTTCACATTTGACTTAATTGGCCACCTACGCGCGCTTTACGCC
CAGTAAATCCGATTAACGCTTGCACCCTCTGTATT
>OTU_70
GGACTACTCGGGTTTCTAATCCTGTTTGCTCCCCACGCTTTCGAGCCTCAACGTCAGTTACAGTCCAGTAAGCCGCCTTC
GCCACTGGTGTTCCTCCTAATATCTACGCATTTCACCGCTACACTAGGAATTCCACTTACCTCTCCTGCACTCAAGTCAA
ACAGTTTCCAAAGCAGTACCGGGGTTGAGCCCCGGGCTTTCACTTCAGACTTGCTTAACCGTCTACGCTCCCTTTACACC
CAGTAAATCCGGATAACGCTTGCCCCCTACGTATT
>OTU_71
GGACTACCGGGGTTTCTAATCCCGTTCGCTCCCCTGGCTTTCGCGCCTCAGCGTCAGTTTTCGTCCAGAAAGTCGCCTTC
GCCACTGGTGTTCTTCCTAATATCTACGCATTTCACCGCTACACTAGGAATTCCACTTTCCTCTCCGATACTCTAGATCA
GCAGTTTCCATCCCATCACGGGGTTAAGCCCCGAACTTTTAAGACAGACTAACTGATCCGCCTGCGCGCGCTTTACGCCC
AATAATTCCGGACAACGCTTGCCACCTACGTATTA
>OTU_72
GGACTACTGGGGTTTCTAATCCCATTCGCTCCCCTAGCTTTCGTCTCTCAGTGTCAGTGTCGGCCCAGCAGAGTGCTTTC
GCCGTTGGTGTTCTTTCCGATCTCTACGCATTTCACCGCTCCACCGGAAATTCCCTCTGCCCCTACCGTACTCCAGCTTG
GTAGTTTCCACCGCCTGTCCAGGGTTGAGCCCTGGGATTTGACGGCGGACTTAAAAAGCCACCTACAGACGCTTTACGCC
CAATCATTCCGGATAACGCTTGCATCCTCTGTATT
>OTU_73
GGACTACCGGGGTTTCTAATCCTGTTTGCTACCCACGCTTTCGAGCCTCAGCGTCAGTTAAAGCCCAGCAGGCCGCCTTC
GCCACTGGTGTTCCTCCTAATATTTACGCATTTCACCGCTACACTAGGAATTCCGCCTGCCTCTACTTCACTCAAGATAC
ACAGTTTTGAGAGCAGTTCATGGGTTGAGCCCATGTATTTCACTCCCAACTTGCATACCCGCCTGCGCTCCCTTTACACC
CAGTAATTCCGGACAACGCTCGTGACCTACGTTTT
>OTU_74
GGACTACCGGGGTTTCTAATCCTGTTTGCTCCCCACGCTTTCGCACCTCAGCGTCAGTATTGATCCAGGGAGCCGCCTTC
GCCACTGGTGTTCCTCCCGATATCTACGCATTTCACCGCTACACCGGGAATTCCACTCCCCTCTATCATACTCAAGCCGA
ACAGTATCGACTGCACTTCCCAGGTTAAGCCCGGGGCTTTCACAACCGACTTATTCAACCGCCTACGTGCGCTTTACGCC
CAGTAATTCCGATTAACGCTCGCACCCCCCGTCTT
>OTU_75
GGACTACTCGGGTTTCTAATCCTGTTCGCTCCCCACGCTTTCGTCCATCAGCGTCAGTTGTAACTTAGTGACCTGCCTTC
GCAATTGGTGTTCTGAGTAATATCTATGCATTTCACCGCTACACTACTCATTCCAGCCACTTCAACTACACTCAAGACTA
ACAGTATCAATGGCAGTTCCACAGTTAAGCTGCGGGCTTTCACCACTGACTTATTAATCCGCCTACGGACCCTTTAAACC
CAATAAATCCGGATAACGCTTGCACCCTCCGTATT
>OTU_76
GGACTACCGGGGTTTCTAATCCTGTTTGCTCCCCACGCTTTCGTGCCTCAGTGTCAGTTACAGTCCAGAAAGCCGCCTTC
GCTACTGGTGTTCCTCCTAATATCTACGCATTTCACCGCTACACTAGGAATTCCACTTTCCTCTCCTGCACTCAAGTTTC
CCAGTTTCAAGAGCTTACTACGGTTGAGCCGTAGCCTTTCACTCCTGACTTAAGAAACCACCTACGCACCCTTTACGCCC
AGTAAATCCGGATAACGCTAGCCCCCTACGTATTA
>OTU_77
GGACTACTAGGGTTTCTAATCCTGTTTGCTCCCCACGCTTTCGTGCATGAGCGTCAGTCGCATCCCAGGGGGCTGCCTTC
GCCATTGGTGTTCTTCCAAATATCTACGCATTTCACTGCTACACTTGGAATTCCACCCCCCTCTGATGAACTCTAGTCCT
GCAGTCACAAATGCAATTCCCAGGTTGAGCCCGGGGATTTCACATCTGTCTTACAGAACCGCCTGCGCACGCTTTACGCC
CAGTAATTCCGATTAACGCTTGCACCCTACGTATT
>OTU_78
GGACTACCGGGGTTTCTAATCCTGTTCGCTCCCCATGCTTTCGCTCCTCAGCGTCAGTTACAGCCCAGAGACCTGCCTTC
GCCATCGGTGTTCCTCCTGATATCTGCGCATTCCACCGCTACACCAGGAATTCCAGTCTCCCCTACTGCACTCTAGTCTG
CCCGTACCCACCGCAGATCCGGGGTTAAGCCCCGGACTTTCACGACAGACGCGACAAACCGCCTACGAGCTCTTTACGCC
CAATAATTCCGGATAACGCTCGCACCCTACGTATT
>OTU_79
GGACTACTCGGGTTTCTAATCCTGTTTGCTCCCCACGCTTTCGAGCCTCAGCGTCATTGTCAGTCCAGTAAGCCGCCTTC
GCCACTGGTGTTCCTCCTAATATCTACGCATTTCACCGCTACACTAGGAATTCCGCTTACCTCTCCTGAAATCAAGCAGG
GCAGTTTCAAAAGCCGTCCCGGGGTTGAGCCCCGGGCTTTCACTTCTGACTTGCTCCGCCGCCTACGCTCCCTTTACACC
CAGTAAATCCGGATAACGCTTGCCCCCTACGTATT
>OTU_80
GGACTACTGGGGTTTCTAATCCTGTTTGCTCCCCACGCTTTCGCGCCTCAGCGTCAGTTTTCGTCTAGAAAGTCGCCTTC
GCCACCGGTGTTCTTCCTAATCTCTACGCATTTCACCGCTACACTAGGAATTCCACTTTCCTCTCCGATACTCCAGCTTC
CCAGTTTCCATCCCCTCATGGGGTTGAGCCCCACGCTTTTAAGATGGACTTAAGAAACCGCCTGCGCGCGCTTTACGCCC
AATAATTCCGGACAACGCTTGCCACCTACGTATTA
>OTU_81
GGACTACTCGGGTTTCTAATCCTGTTTGCTCCCCACGCTTTCGCACCTCAGTGTCAGTATCAGTCCAGGTGGTCGCCTTC
GCCACTGGTGTTCCTTCCTATATCTACGCATTTCACCGCTACACAGGAAATTCCACCACCCTCTACCATACTCTAGTCAG
TCAGTTTTGAATGCAGTTCCCAGGTTGAGCCCGGGGATTTCACATCCAACTTAACAAACCACCTACGCGCGCTTTACGCC
CAGTAATTCCGATTAACGCTTGCACCCTCTGTATT
>OTU_82
GGACTACCGGGGTTTCTAATCCTGTTTGATTCCCGCACCTTCGAGCATCAATGTCAGTGGCGCTATGGTACAATGCCTAC
GCTTTCGGAGTTCTTCGTGATATCTATGCATTTCACCGCTACACCACGAATTCCATGTACCCACACCGCACTCAAGTCTT
ACAGTTTCAACTGATAATAAGGGTTGAGCCCATACATTTGACAGCTGACTTAAAAAACCATCTACGCTCCCTTTAAACCC
AATAAATCCGGATAACGCTCGCATCCTCCGTATTA
>OTU_83
GGACTACTAGGGTTTCTAATCCTGTTCGATACCCACGCTTTCGTGCCTCAGCGTCTGTTTCACCCTAGCAGGCTGCCTTC
GCAATCGGGGTTCTGCGTGATATCTATGCATTTCACCGCTACACCACGCATTCCGCCTGCCTCTTGTGTACTCTAGCTCG
CCAGTTTCAACGGCACACTCCGGGTTGAGCCCGGAAATTTCACCGCTGACTTGGCGTGCCGCCTACGCACCCTTTAAACC
CAATAAATCCGGATAACGCTTGCATCCTCCGTATT
>OTU_84
GGACTACTCGGGTTTCTAATCCTGTTTGCTCCCCACGCTTTCGCACCTCAGCGTCAATACCAGTCCAGTGAGCCGCCTTC
GCCACTGGTGTTCTTCCGAATATCTACGAATTTCACCTCTACACTCGGAATTCCACTCACCTCTCCTGGATTCAAGCGAT
GCAGTCTTAAAGGCAATTCTGGAGTTGAGCTCCAGGCTTTCACCTCTAACTTACAAAGCCGCCTACGTGCGCTTTACGCC
CAGTAATTCCGAACAACGCTAGCCCCCTCCGTATT
>OTU_85
GGACTACTAGGGTTTCTAATCCTGTTTGCTCCCCACGCTTTCGTGCCTCAGTGTCAGTTATGGGCCAAATAGTCGCCTTC
GCCACTGGTGTTCCTCCTAATATCTACGCATTCCACCGCTACACTAGGAATTCCACTATTCTCTCCCACACTCAAGTCTA
GTAGTTTTGAAAGCAGCACCCGAGTTAAGCCCTGGGTATTTCACTTCCAACTTGCTAAACCACCTACGCACCCTTTACGC
CCAATAATTCCGGACAACGCTTGCCCCCTACGTAT
>OTU_86
GGACTACCGGGGTTTCTAATCCTGTTTGCTCCCCACGCTTTCGCACCTCAGCGTCAGTATCGAGCCAGTGAGCCGCCTTC
GCCACTGGTGTTCCTCCGAATATCTACGAATTTCACCTCTACACTCGGAATTCCACTCACCTCTCTCGAACTCCAGACTG
ATAGTTTTGAAGGCAGTTCCGAGGTTGAGCCCCGGGATTTCACCCCCAACTTTCCAGTCCGCCTACGTGCGCTTTACGCC
CAGTAATTCCGAACAACGCTAGCCCCCTCCGTATT
>OTU_87
GGACTACTGGGGTTTCTAATCCTGTTCGCTACCCATGCTTTCGAACCTCAGCGTCAGTTACAGACCAGAGAGCCGCTTTC
GCCACTGGTGTTCTTCCATATATCTACGCATTCCACCGCTACACTAGGAATTCCGCCTGCCTCTCCAGTACTCAAGAACT
ACAGTTTCAAATGCAGTTCCGGGGTTGAGCCCCGGAATTTCACATCTGACTTGTAATCCCGCCTACACGCCCTTTGCACC
CAGTAAATCCGGATAACGCTTGCACCCTACGTATT
>OTU_88
GGACTACTCGGGTTTCTAATCCTGTTTGATACCCACACTTTCGAGCATCAGCGTCAGTTACAGTCCAGTAAGCTGCCTTC
GCAATCGGAGTTCTTCGTGATATCTAAGCATTTCACCGCTACACCACGAATTCCGCCTACCTATGCTGCACTCAAGGCGC
CCAGTATCAACTGCAATTTTACGGTTGAGCCGCAAACTTTCACAACTGACTTAAGCACCCGCCTACGCTCCCTTTAAACC
CAATAAATCCGGATAACGCTCGGATCCTCCGTATT
>OTU_89
GGACTACTGGGGTTTCTAATCCTGTTTGCTCCCCACGCTTTCGCACCTCAGCGTCAATACTTGTCCAGCGAGCCGCCTTC
GCCACTGGTGTTCTTCCGAATATCTACGAATTTCACCTCTACACTCGGAATTCCACTCGCCTCTCCAAGATTCTAGCAAT
CCAGTCTCAAAGGCAGTTCCGGGGTTGAGCCCCGGGCTTTCACCTCTGACTTAAATCGCCGCCTACGTGCGCTTTACGCC
CAGTAATTCCGAACAACGCTAGCTCCCTCCGTATT
>OTU_90
GGACTACCGGGGTTTCTAATCCTGTTTGATCCCCACGCTTTCGTGCCTCAGCGTCAATGATGGATTAGTAAGCTGCCTTC
GCAATCGGTGTTCTGTGTAATATCTATGCATTTCACCGCTACACTACACATTCCGCCTACCTCATCCATATTCAAGTCCA
ACAGTATCAATGGCAATCCTACCGTTAAGCGACAGACTTTCACCACTGACTTATCAAACAACCTGCGCACCCTTTAAACC
CAATAAATCCGGATAACGCTTGCATCCTCCGTATT
>OTU_91
GGACTACCGGGGTTTCTAATCCTGTTTGCTCCCCACGCTTTCGTGCCTCAGTGTCAGTTGCAGGCCAGTAAGTCGCCTTC
GCCACTGGTGTTCCTCCTAATATCTACGCATTCCACCGCTACACTAGGAATTCCACTTACCTCTCCTGTACTCAAGTTCA
ACAGTCTTGGCAGTAGCGCCGAAGTTAAGCTTCGGAAATTCACTACCAACTTGTTAAACCACCTACGCACCCTTTACGCC
CAGTCATTCCGGACAACGCTTGCTACCTACGTATT
>OTU_92
GGACTACTCGGGTTTCTAATCCTGTTTGCTCCCCACGCTTTCGCACATGAGCGTCAGTACATTCCCAAGGGGCTGCCTTC
GCCTTCGGTATTCCTCCACATCTCTACGCATTTCACCGCTACACGTGGAATTCTACCCCTCCCTAAAGTACTCTAGCGAC
CCAGTATGAAATGCAATTCCCAGGTTAAGCCCGGGGCTTTCACACCTCACTTAAGTCACCGCCTGCGTGCCCTTTACGCC
CAGTTATTCCGATTAACGCTCGCACCCTCCGTATT
>OTU_93
GGACTACCGGGGTTTCTAATCCCGTTTGCTACCCTAGCTTTCGCGTCTGAGTGTCAGGAGTGGTCCAGGAGGCCGCCTTC
GCCACTGGTGTTCCTCCGGATATCTGCGCATTCCACCGCTACACCCGGAATTCCACCTCCCTCTACCATCCTCAAGCTTG
GCAGTTTAGAACGTCCTCTCCCAGTTGAGCCAGGAGCTTTCACGCCCTACTTACCAAACCACCTACACGCGCTTTACGCC
CAGTAAATCCGGATAACGTTTGCCTCCTACGTGTT
>OTU_94
GGACTACCGGGGTTTCTAATCCTGTTTGCTCCCCACGCTTTCGCGTCTCAGCGTCAGTTGTCGTCCAGAAAGTCGCCTTC
GCCACCGGTGTTCCTCCTGATATCTACGCATTTCACCGCTACACCAGGAATTCCACTTTCCCCTCCGACACTCAAGATAC
GCAGTTTCAGATGCAGTTCCGCGGTTGAGCCGCGGGATTTCACATCTGACTTGCACACCCGCCTACACGCCCTTTACACC
CAGTAAATCCGGACAACGCTTGCCACCTACGTATT
>OTU_95
GGACTACCGGGGTTTCTAATCCTGTTTGCTCCCCACGCTTTCGCGCCTCAGCGTCAGTTGTCGTCCAGCAAGCCGCCTTC
GCCACTGGTGTTCCTCCTAATATCTACGCATTTCACCGCTACACTAGGAATTCCGCTTGCCTCTCCGATACTCAAGGGCT
ACAGTTTCAAATGCAGTTTCCGGGTTAAGCCCGGAGATTTCACATCTGACTTGCAGCTCCGCCTACACGCCCTTTACACC
CAGTAAATCCGGATAACGCTCGCCACCTACGTATT
>OTU_96
GGACTACTAGGGTTTCTAATCCTGTTTGATCCCCACGCTTTCGTGCCTCAGCGTCAATATTTGTGTAGTGAGCTGCCTTC
GCAATTGGTGTTCTATGACATATCTAAGCATTTCACCGCTACATGTCACATTCCGCCAACCTCAACATATTTCAAGAACA
GCAGTATCAAAGGCAAGTCCATTGTTAAGCAATGAGATTTCACCTCTGACTTACCGCCCCGCCTACGCACCCTTTAAACC
CAGTGATTCCGGATAACGCTTGCACCCTCCGTATT
>OTU_97
GGACTACCGGGGTTTCTAATCCTGTTTGATACCCACGCCTTCGTGCTTCAGTGTCAGTCGCAGTATGGCAAGCTGCCTTC
GCAATCGGAGTTCCTCGTGATATCTATGCATTTCACCGCTACACCACGAATTCCGCCTGCCGCCACTGAACTCAAGCCCG
GCAGTTTCAACGGCAGGCTGAACGTTGAGCGCTCAGGTTTCACCGCTGACTTACCGAACAACCTACGCACCCTTTAAACC
CAATAAATCCGGATAACGCTCGCATCCTCCGTATT
>OTU_98
GGACTACCGGGGTTTCTAATCCTGTTTGATCCCCACACTTTCGTGCCTCAGCGTCAGTATCAGTTTAGTAAGCTGCCTAC
GCTATCGGAGTTCTTTATAGTATCTAAGCATTTCACCGCTACACTATAAATTCCGCCTACCTCATCTGAACTCAAGCTTT
GCAGTATCAATGGCAGTTTAACAGTTAAGCTGCTAGCTTTCACCACTGACTTACAAAACCGCCTACGCACCCTTTAAACC
CAATAAATCCGGACAACGCTTGCACCCTCCGTATT
>OTU_99
GGACTACTGGGGTTTCTAATCCTGTTTGCTCCCCACGCTTTCGCACCTCAGCGTCAGTATCAGCCCAGACAGTCGCCTTC
GCCACTGGTGTTCCTTCTAATATCTACGCATTTCACCGCTACACTAGAAATTCCACTATCCTCTGCTGTACTCAAGTCAC
ACAGTTTTGAAAGCAATTCCAAGGTTGAGCCCTGGGATTTCACCTCCAACTTATGTAACCGCCTACGCGCGCTTCACGCC
CAGTAATTCCGATTAACGCTTGCACCCTCCGTATT
>OTU_100
GGACTACTAGGGTTTCTAATCCTGTTTGCTACCCACGCTTTCGTGCCTCAGCGTCAGTTAAAGCCCAGCAGGCCGCCTTC
GCCACTGGTGTTCCTCCCCATCTCTACGCATTTCACCGCTACACGGGGAATTCCGCCTGCCTCTACTTCACTCAAGCTCT
GCAGTTTCAAATGCAGGCTATGGGTTGAGCCCATAGATTTCACATCTGACTTGCAAAGCCGCCTACGCACCCTTTACACC
CAGTAAATCCGGACAACGCTTGCTCCCTACGTATT
>OTU_101
GGACTACCGGGGTTTCTAATCCTGTTCGCTCCCCACGCTTTCGCTCCTCAGCGTCAGTATCGGCCCAGAGACCCGCCTTC
GCCACCGGTGTTCCTCCTGATATCTGCGCATTTCACCGCTACACCAGGAATTCCAGTCTCCCCTACCGAACTCTAGCCCG
CCCGTATCGACTGCAAGCCCACAGTTAAGCCGCGGGTTTTCACAGTCGACGCGACAAGCCGCCTACGAGCTCTTTACGCC
CAATAAATCCGGACAACGCTCGCGCCCTACGTCTT
>OTU_102
GGACTACTGGGGTTTCTAATCCTGTTTGCTCCCCACGCTTTCGCGCCTCAGCGTCAGTTGCTGTCCAGCAGGCCGCCTTC
GCCACTGGTGTTCCTCCGTATATCTACGCATTTCACCGCTACACACGGAATTCCGCCTGCCTCTCCAGTACTCAAGAAGT
ACAGTTTCAAATGCAGGCTATGGGTTGAGCCCATAGTTTTCACATCTGACTTGCACTCCCGCCTACACGCCCTTTACACC
CAGTAAATCCGGATAACGCTTGCTCCCTACGTATT
>OTU_103
GGACTACTCGGGTTTCTAATCCTGTTTGCTCCCCACGCTTTCGAGCCTCAGCGTCAGTTATCGTCCAGTAAGCCGCCTTC
GCCACTGGTGTTCCTCCTAATATCTACGCATTTCACCGCTACACTAGGAATTCCACTTACCCCTCCGACACTCTAGATGA
CCAGTTTCCAATGCAGTACCGGGGTTGAGCCCCGGGCTTTCACATCAGACTTAGCCTTCCGCCTGCGCTCCCTTTACACC
CAGTAAATCCGGATAACGCTTGCACCATACGTATT
>OTU_104
GGACTACCGGGGTTTCTAATCCTGTTTGATCCCCACGCTTTCGTGCCTCAGCGTCAGATAACAGCCAGTCAGCTGCCTTC
GCAATTGGTGTTCTAAGACATCTCTATGCATTTCACCGCTACATGTCTCATTCCGCCAACCTCACTGTATCTCAAGTCCC
TCAGTTTCAATGGCAATTCCGTCGTTAAGCGACGAGCTTTCACCACTGACTTAAAAGACCGCCTACGCACCCTTTAAACC
CAGTAAATCCGGATAACGCTTGCACCCTCTGTATT
>OTU_105
GGACTACTCGGGTTTCTAATCCCGTTCGCTCCCCACGCTTTCGCATCTCAGCGTCAGTAATGACCCAGATGGTCGCCTTC
GCCACCGGTGTTCTTTCCAATATCTACGAATTTCACCTCTACACTGGAAATTCCACCATCCTCTGTCATACTCAAGAACT
ACAGTTTCAAAGGCAATTCCGGGGTTGAGCCCCGGGATTTCACCCCTGACTTGTAGTTCCGCCTACATGCGCTTTACGCC
CAGTTATTCCGAATAACGCTAGCTCCCTTCGTATT
>OTU_106
GGACTACTCGGGTTTCTAATCCTGTTTGCTCCCCACGCTTTCGCGCCTCAGCGTCAGTTACAGACCAGAAAGCCGCCTTC
GCCACTGGTGTTCCTCCACATCTCTACGCATTTCACCGCTACACGTGGAATTCCGCTTTCCTCTTCTGCACTCAAGTCCC
CCAGTTTCCAATGACCGCTTGCGGTTGAGCCGCAAGATTTCACATCAGACTTAAAGGACCGCCTGCGCGCGCTTTACGCC
CAATAAATCCGGACAACGCTTGCCACCTACGTATT
>OTU_107
GGACTACTCGGGTTTCTAATCCTGTTTGCTCCCCACGCTTTCGTGCATGAGCGTCAGTGCAGGCCCAGGGGATTGCCTTC
GCCATCGGTGTTCCTCCGCATATCTACGCATTTCACTGCTACACGCGGAATTCCATCCCCCTCTGCCGCACTCCAGCCTT
GCAGTCACAATGGCAGTTCCCAGGTTGAGCCCGGGGATTTCACCACTGTCTTACAAAACCGCCTGCGCACGCTTTACGCC
CAGTAATTCCGATTAACGCTTGCACCCTACGTATT
>OTU_108
GGACTACTGGGGTTTCTAATCCTGTTTGCTCCCCACGCTTTCGTGCCTCAGCGTCAGTTACAGTCCAGAAAGCCGCCTTC
GCCACCGGTGTTCCTCCTAATATCTACGCATTTCACCGCTACACTAGGAATTCCGCTTTCCTCTCCTGCACTCAAGTCCG
ACAGTATTGGATGCAGCCCCCAAGTTAAGCCCGGGTATTTCACATCCAACTTACCAAACCGCCTACGCACCCTTTACGCC
CAGTAATTCCGGACAACGCTCGCCCCCTACGTATT
>OTU_109
GGACTACTGGGGTTTCTAATCCTGTTCGCTCCCCACGCTTTCGTGCCTGAGCGTCAGTTACGGTCTAGTAAGCTGCCTTC
GCTATCGGTGTTCTTTATGGTATCTATGCATTTCACCGCTACACCATAAATTCCGCCTACCTCGTCCGTACTCAAGTGCG
CCAGTATCAATGGCAGTTCCGCAGTTGAGCTGCGGGATTTCACCACTGACTTAACGCACCGCCTACGCACCCTTTAAACC
CAATAAATCCGGACAACGCTTGCACCCTCCGTATT
>OTU_110
GGACTACTCGGGTTTCTAATCCTGTTTGCTCCCCACGCTTTCGTGCCTCAGTGTCAGTAACAGTCCAGCAGGCCGCCTTC
GCCACTGGTGTTCCTCCTAATATCTACGCATTTCACCGCTACACTAGGAATTCCGCCTGCCTCTCCTGTACTCTAGCCGA
GCAGTTTCAAATGCAGCTCCGGGGTTGAGCCCCGGCCTTTCACATCTGACTTGCACTGCCACCTACGCACCCTTTACACC
CAGTAAATCCGGATAACGCTTGCTCCATACGTATT
>OTU_111
GGACTACTGGGGTTTCTAATCCTGTTCGCTCCCCATGCTTTCGCTCCTCAGCGTCAGTTACTGCCCAGAGACCTGCCTTC
GCCATCGGTGTTCCTCCTGATATCTGCGCATTTCACCGCTACACCAGGAATTCCAGTCTCCCCTACAGCACTCTAGTTAT
GCCCGTATCGCCTGCAGACCCGGAGTTAAGCCCCGGGCTTTCACAGACGACGCGACAAACCACCTACGAGCTCTTTACGC
CCAGTAATTCCGGACAACGCTTGCACCCTACGTAT
>OTU_112
GGACTACTGGGGTTTCTAATCCTGTTCGATACCCGCACTTTCGAGCTTCAGCGTCAGTTGTGCTCCCGCAAGCTGCCTTC
GCAATCGGAGTTCTTCGTCATATCTAAGCATTTCACCGCTACACGACGAATTCCGCCTGCGTTGCGCACACTCAAGTGGA
CCAGTTCGCGCTGCAGTGCAGACGTTGAGCACCTGCATTTCACAACACGCTTAATCCACGGCCTACGCTCCCTTTAAACC
CAATAAATCCGGATAACGCCCGGACCTTCCGTATT
>OTU_113
GGACTACTGGGGTTTCTAATCCTGTTCGATACCCACGCTTTCGTGCTTCAGCGTCAGTTATAGCCCAGTATGCTGCCTTC
GCAATCGGGGTTCTGCGTGATATCTATGCATTTCACCGCTACACCACGCATTCCGCATACCTCTTTTATACTCTAGAAAA
ACAGTTTCATCGGCAATTCTCCAGTTGAGCTGAAGCATTTCACCGCTGACTTATTCTTCCGCCTACGCACCCTTTAAACC
CAATAAATCCGGATAACGCTCGCATCTTCCGTATT
>OTU_114
GGACTACCAGGGTTTCTAATCCTGTTTGCTCCCCACGCTTTCGAGCCTCAACGTCAGTTACAGTCCAGTAAGCCGCCTTC
GCCACTGGTGTTCCTCCTAATATCTACGCATTTCACCGCTACACTAGGAATTCCACTTACCTCTCCTGCACTCTAGTCCT
ACAGTTTCCAAAGCAGTCCCGGGGTTAAGCCCCGGGCTTTCACTTCAGACTTGCAAAACCGTCTACGCTCCCTTTACACC
CAGTAAATCCGGATAACGCTTGCCCCCTACGTATT
>OTU_115
GGACTACCGGGGTTTCTAATCCTGTTTGCTCCCCACGCTTTCGTGCCTCAACGTCAGATATAGTTTGGTAAGCTGCCTTC
GCAATCGGTGTTCTGTATGATCTCTAAGCATTTCACCGCTACACCATACATTCCGCCTACCGCAACTACTCTCTAGCTCA
ACAGTATTAGAGGCACGTTCAGGGTTGAGCCCCGAAATTTCACCTCTAACTTATCAAACCGCCTACGCACCCTTTAAACC
CAATAAATCCGGATAACGCTTGAATCCTCCGTATT
>OTU_116
GGACTACCGGGGTATCTAATCCTGTTTGCTCCCCACGCTTTCGAGCCTCAGCGTCAGTTACAGACCAGAGAGCCGCCTTC
GCCACTGGTGTTCCTCCATATATCTACGCATTTCACCGCTACACATGGAATTCCACTCTCCTCTTCTGCACTCAAGTCTC
CCAGTTTCCAATGACCCTCCCCGGTTGAGCCGGGGGCTTTCACATCAGACTTAAGAAACCGCCTGCGCTCGCTTTACGCC
CAATAAATCCGGACAACGCTTGCCACCTACGTATT
>OTU_117
GGACTACTCGGGTTTCTAATCCTGTTTGCTCCCCACGCTTTCGCGCCTCACCGTCAGTTGTCGTCCAGTAATCCGCCTTC
GCCACTGGTGTTCTTCCTTATATCTACGCATTTCACCGCTACACAAGGAATTCCGATTACCTCTCCGATACTCAAGAAAA
GCAGTTTCAAATGCAGTTTGGAGGTTGAGCCTCCAGATTTCACATCTGACTTGCCTTCCCGGCTACACGCCCTTTACACC
CAGTAAATCCGGACAACGCTTGCCACCTACGTATT
>OTU_118
GGACTACCGGGGTTTCTAATCCTGTTTGATACCCACACTTTCGAGCATCAGCGTCAGTTACAATCCAGTAAGCTGCCTTC
GCAATCGGAGTTCTTCGTGATATCTAAGCATTTCACCGCTACACCACGAATTCCGCCTACCTCTGTTGCACTCAAGGTCG
CCAGTATCAACTGCAATTTTACGGTTGAGCCGCAAACTTTCACAACTGACTTAACAACCCGCCTACGCTCCCTTTAAACC
CAATAAATCCGGATAACGCTCGGATCCTCCGTATT
>OTU_119
GGACTACTCGGGTTTCTAATCCTGTTTGCTCCCCACGCTTTCGAGCCTCAACGTCAGTTATCGTCCAGTAAGCCGCCTTC
GCCACTGGTGTTCCTCCTAATATCTACGCATTTCACCGCTACACTAGGAATTCCACTTACCTCTCCGACACTCTAGCAAA
ACAGTTTCCAAAGCAGTCCCAGGGTTGAGCCCTGGGTTTTCACTTCAGACTTGCTTCGCCGTCTACGCTCCCTTTACACC
CAGTAAATCCGGATAACGCTTGCCCCCTACGTATT
>OTU_120
GGACTACTGGGGTTTCTAATCCTGTTTGCTCCCCACGCTTTCGCGCCTCAGCGTCAGTTAATGTCCAGCAAGCCGCCTTC
GCCACTGGTGTTCCTCCTAATATCTACGCATTTCACCGCTACACTAGGAATTCCACTTACCTCTCCTGCACTCTAGTTCC
ACAGTTTCAGATGCAGTTCTAAAGTTGAGCTCTAGCATTTCACATCTGACTTGCAGTTCCGTCTACTCGCCCTTTACACC
CAGTAAATCCGGATAACGCTCGGACCCTACGTATT
>OTU_121
GGACTACTAGGGTTTCTAATCCTGTTTGCTCCCCACGCTTTCGCGCCTCAGCGTCAGTTGTCGTCCAGCAGGCCGCCTTC
GCCACTGGTGTTCCTCCTAATATCTACGCATTTCACCGCTACACTAGGAATTCCGCCTGCCTCTCCGATACTCAAGGGAA
ACAGTTTCAAAAGCAGTTCATGGGTTAAGCCCATGGATTTCACTTCTGACTTGCTTCTCCGCCTACACGCCCTTTACACC
CAGTAAATCCGGACAACGCTTGCCACCTACGTATT
>OTU_122
GGACTACCGGGGTTTCTAATCCTGTTTGCTACCCACGCTTTCGTGCATGAGCGTCAGTGTTATCCCAGGAGGCTGCCTTC
GCCATCGGTGTTCCTCCGCATCTCTACGCATTTCACTGCTACACGCGGAATTCCACCTCCCTCTCCGACACTCAAGCGAG
GCAGTTTCGAGTGCACTTCCCAGGTTGAGCCCGGGGCTTTCACACCCGACTTGCCAAGCCGCCTACACGCGCTTTACGCC
CAGTAATTCCGAACAACGTTTGCACCCTCTGTCTT
>OTU_123
GGACTACCGGGGTTTCTAATCCTGTTCGCTACCCACGCTTTCGTGCCTCAGCGTCAGTCACAGTCCAGAAAGTCGCCTTC
GCCACTGGTGTTCCTTCTAATATCTACGCATTCCACCGCTACACTAGAAATTCCACTTTCCCCTCCTGCACTCAAGCTAA
TCGGTTTCAAAGGCTTACATTGGTTAAGCCAATGCCTTTCACCCCTGACCTTCTTAGCCGCCTGCGCACGCTTTACGCCC
AATAATTCCGGATAACGCTTGCCCCCCACGTATTA
>OTU_124
GGACTACCGGGGTTTCTAATCCTGTTTGCTCCCCACGCTTTCGTGCCTCAGTGTCAGTTTCAGTCCAGTAAGCCGCCTTC
GCCACTGATGTTCCTCCTAATATCTACGCATTTCACCGCTACACTAGGAATTCCGCTTACCTCTCCTGCACTCTAGCTGG
ACAGTTTCAAAAGCAGTCCCGGAGTTGAGCCCCGGGTTTTCACTTCTGACTTGCCCTGCCACCTACGCACCCTTTACACC
CAGTAATTCCGGATAACGCTTGCCCCCTACGTATT
>OTU_125
GGACTACCGGGGTTTCTAATCCTGTTTGCTCCCCACGCTTTCGTGCCTCAGTGTCAGTTTCAGTCCAGCAGGCCGCCTTC
GCCACTGGTGTTCCTCCCAATATCTACGCATTTCACCGCTACACTAGGAATTCCGCTTACCTCTCCTGCACTCTAGCATT
ACAGTTTCAGATGCAGTCCTAAGGTTAAGCCCTAGGTTTTCACATCTGACTTGCAACGCCGTCTACTCGCCCTTTACACC
CAGTAAATCCGGATAACGCTTGCACCCTACGTATT
>OTU_126
GGACTACTCGGGTTTCTAATCCTGTTTGCTACCCATGCTTTCGTGCCTCAGCGTCAGTTAAAGCCCAGTAGGCCGCCTTC
GCCACTGGTGTTCCTCCCGATCTCTACGCATTTCACCGCTACACCGGGAATTCCGCCTACCTCTACTTCACTCAAGCCGG
ACAGTTTCAATTGCACGTTATGGGTTAAGCCCATAGTTTTCACAACTGACTTGCTCGGCCGCCTACGCACCCTTTACACC
CAGTAAATCCGGACAACGCTCGCTCCCTACGTATT
>OTU_127
GGACTACCGGGGTTTCTAATCCTGTTTGCTCCCCACGCTTTCGCGTCTCAGCGTCAGTAGCCGTCCAGGTGGCCGCCTTC
GCCACTGGTGTTCCTCCCGATATCTACGAATTTCACCTCTACACCGGGAATTCCGCCACCCTCTCCGGTACTCAAGTCTC
GTAGTTTCGAACGCACTTCCTCGGTTAAGCCGAGGGCTTTCACATCCGACTTGCGAGACCGCCTACACGCGCTTTACGCC
CAATAATTCCGAACAACGCCTGCACCCTCTGTATT
>OTU_128
GGACTACCAGGGTTTCTAATCCTGTTTGATACCCACACTTTCGAGCATCAGCGTCAGTTACAGTCCAGTAAGCTGCCTTC
GCAATCGGAGTTCTTCGTGATATCTAAGCATTTCACCGCTACACCACGAATTCCGCCTACCTCTACTGCACTCAAGACGA
CCAGTATCAACTGCAATTTTACGGTTGAGCCGCAAACTTTCACAGCTGACTTAATAGTCCGCCTACGCTCCCTTTAAACC
CAATAAATCCGGATAACGCTCGGATCCTCCGTATT
>OTU_129
GGACTACTCGGGTTTCTAATCCTGTTTGCTACCCACACTTTCGAGCCTCAGCGTCAGTAAAAGCCCAGCAGGCCACCTTC
GCCACTGGTGTTCCTCCTAATATCTACGCATTTCACCGCTACACTAGGAATTCCGCCTGCCTCTACTTCACTCAAGAAAC
GCAGTTTTGAACGCGGCTACCAGTTAAGCCGGTAGATTTGACATTCAACTTGCATTCCCGCCTACGCTCCCTTTACACCC
AGTAATTCCGGACAACGCTTGCTCCCTACGTATTA
>OTU_130
GGACTACCCGGGTTTCTAATCCTGTTTGCTCCCCACGCTTTCGAGCCTCAACGTCAGTTGCCGTCCAGTAAGCCGCCTTC
GCCACTGGTGTTCCTCCTAATATCTACGCATTTCACCGCTACACTAGGAATTCCGCTTACCTCTCCGGCACTCAAGCAAA
ACAGTTTCCAATGCAGTCACGGGGTTGAGCCCCGGGTTTTCACATCAGACTTGCCTCGCCGTCTACGCTCCCTTTACACC
CAGTAAATCCGGATAACGCTTGCCCCCTACGTATT
>OTU_131
GGACTACCGGGGTTTCTAATCCTGTTTGCTCCCCACGCTTTCGAGCCTCAGTGTCAGTAACAGACCAGAATGTCGCCTTC
GCCACTGGTGTTCTTCCATATATCTACGCATTCCACCGCTACACATGGAGTTCCACATTCCTCTTCTGTACTCAAGTTTC
CCAGTTTCCAATGACCCTCCACGGTTAAGCCGTGGGCTTTCACATCAGACTTAAGAAACCACCTGCGCTCCCTTTACGCC
CAATAAATCCGGACAACGCTTGCCACCTACGTATT
>OTU_132
GGACTACCGGGGTTTCTAATCCTGTTTGCTCCCCACGCTTTCGCTCCTCAGCGTCAGTTAGTGTCCAGCAAGCCGCCTTC
GCCACTGGTGTTCCTCCCGATATCTATGCATTCCACCGCTACACCGGGAATTCCGCTTGCCTCTCCACCACTCAAGAATA
ACAGTTTCAAATGCAGCTCCGGAGTTGAGCCCCGGTATTTCACATCTGACTTGCTATCCCGCCTACTCGCCCTTTACACC
CAGTAAATCCGGATAACGCTCGCCACCTACGTATT
>OTU_133
GGACTACTCGGGTTTCTAATCCTGTTTGCTCCCCACGCTTTCGAGCCTCAACGTCAGTTACCGTCCAGTAAGCCGCCTTC
GCCACTGGTGTTCCTCCTAATATCTACGCATTTCACCGCTACACTAGGAATTCCGCTTACCTCTCCGGCACTCAAGACGG
GCAGTTTCCAATGCAGTCCCGGGGTTGAGCCCCAGCCTTTCACATCAGACTTGTCCATCCGTCTACGCTCCCTTTACACC
CAGTAAATCCGGATAACGCTTGCCCCCTACGTATT
>OTU_134
GGACTACCGGGGTTTCTAATCCTGTTCGCTCCCCACGCTTTCGAGCCTCAGCGTCAGTTACAGACCAGAGAGCCGCTTTC
GCCACCGGTGTTCCTCCATATATCTACGCATTTCACCGCTACACATGGAATTCCACTCTCCCCTTCTGCACTCAAGTTAA
ACAGTTTCCAAAGCCTACAATGGTTGAGCCACTGCCTTTCACTTCAGACTTATCTAACCGCCTGCGCTCGCTTTACGCCC
AATAAATCCGGACAACGCTCGGGACCTACGTATTA
>OTU_135
GGACTACTGGGGTTTCTAATCCTGTTTGCTCCCCACACTTTCGAGCCTCAGCGTCAGTTAGAGCCCAGCAAGCCGCCTTC
GCCACTGGTGTTCCTCCGAATATCTACGCATTTCACCGCTACACTCGGAATTCCGCTTGCCTCTACTCCACTCAAGAATA
ACAGTTTCAACTGCAGTTTATGGGTTGAGCCCATAGTTTTCACAGCTGACTTGCTATCCCGCCTGCGCTCCCTTTACACC
CAGTAATTCCGGATAACGCTTGCCACCTACGTATT
>OTU_136
GGACTACTCGGGTTTCTAATCCTGTTTGCTCCCCACGCTTTCGAGCCTCAGCGTCAGTTTCAGTCCAGAAAGCCGCCTTC
GCCACTGGTGTTCTTCCTAATATCTACGCATTTCACCGCTACACTAGGAATTCCGCTTTCCTCTCCTGTACTCTAGCTCG
CCAGTTCCAAATGCAATCCGCGAGGTTAAGCCTCGGGCTTTCACATCTGGCTTGGCGTGCCGCCTACGCTCCCTTTACAC
CCAGTAATTCCGGATAACGCTTGCCCCCTACGTAT
>OTU_137
GGACTACTGGGGTTTCTAATCCTGTTTGCTCCCCACGCTTTCGAGCCTCAACGTCAGTCATCGTCCAGCAAGCCGCCTTC
GCCACTGGTGTTCCTCCTAATATCTACGCATTTCACCGCTACACTAGGAATTCCACTTGCCTCTCCGACACTCTAGCTCA
GCAGTTCCAAATGCAGTCCCGGGGTTGAGCCCCGGGCTTTCACATCTGGCTTGCCGTGCCGTCTACGCTCCCTTTACACC
CAGTAAATCCGGATAACGCTTGCCCCCTACGTATT
>OTU_138
GGACTACTGGGGTTTCTAATCCTGTTTGCTCCCCACGCTTTCGAGCCTCAACGTCAGTTACAGTCCAGAAAGCCGCTTTC
GCCACCGGTGTTCTTCCATATATCTACGCATTTCACCGCTACACATGGAGTTCCACTTTCCTCTACTGCACTCAAGTTAT
CCAGTTTCCAAAGCCCTTCCTCAGTTGAGCTGAGGGCTTTCACTTCAGACTTAAATAACCGCCTGCGCTCGCTTTACGCC
CAATAAATCCGGACAACGCTTGCCACCTACGTATT
>OTU_139
GGACTACTCGGGTTTCTAATCCTGTTTGCTCCCCACACTTTCGCGCCTCAGCGTCAGTTACAGTCCAGTTAGTCGCCTTC
GCCACTGGTGTTCCTCCCAATCTCTACGCATTTCACCGCTACACTGGGAATTCCACTAACCTCTCCTGCACTCAAGCCCG
ACAGTATCCAAAGCAATTCCCACCTTAAAAGCAGGACTTTCACTCCAGACTTACCGAGCCGCCTACGCGCCCTTTACGCC
CAATTATTCCGGACAACGCTTGCCCCCTACGTATT
>OTU_140
GGACTACTCGGGTTTCTAATCCTGTTTGCTCCCCACGCTTTCGAGCCTCAACGTCAGTCATCGTCCAGAAAGCCGCCTTC
GCCACTGGTGTTCCTCCTAATATCTACGCATTTCACCGCTACACTAGGAATTCCGCTTTCCTCTCCGACACTCTAGCCTG
ACAGTTCCAAATGCAGTCCCGGGGTTGAGCCCCGGGCTTTCACATCTGGCTTGCCATGCCGTCTACGCTCCCTTTACACC
CAGTAAATCCGGATAACGCTTGCCCCCTACGTATT
>OTU_141
GGACTACTCGGGTTTCTAATCCCGTTTGCTCCCCTAGCTTTCGTTCCTCAGCGTCAGATTGACCCCAGGTAATCGCCTTC
GCCACTGGTGTTCCTCCCGATATCTACGCATTTCACCGCTACACCGGGAATTCCATTACCCTCTGATCACCTCAAGCTCG
ATAGTATCCGTGCCGTTCCCTGGGTTGAGCCCAGGTCTTTCTTCACAGACTTATCAAGCCGCCTACGAACTCTTTACGCC
CAATAATTCCGAATAACGCTCGCCCCCTACGTCTT
>OTU_142
GGACTACTCGGGTTTCTAATCCTGTTTGATCCCCACGCTTTCGTGCCTCAGCGTCAATCACTGTGTAGCGAGCTGCCTTC
GCAATCGGTGTTCTACATCATATCTAAGCATTTCACCGCTACATGATGTATTCCGCCCACCTCCACAGTATTCAAGATAA
ATAGTATCAACGGCAGTTCCGAAGTTAAGCTTCGGGATTTCACCACTGACTTACTTACCCGCCTACGCACCCTTTAAACC
CAGTGAATCCGGATAACGCTTGCACCCTCCGTATT
>OTU_143
GGACTACTGGGGTTTCTAATCCTGTTTGATCCCCACGCTTTCGTGCCTCAGCGTCAATATTTGTGTAGTGAGCTGCCTTC
GCAATTGGTGTTCTATGTCATATCTAAGCATTTCACCGCTACATGACATATTCCGCTCACCTCCACAACATTCAAGACAC
ATAGTATCCATGGCAGTTTCCGAGTTAAGCTCGGAGATTTCACCACGGACTTACATGCCCGCCTACGCACCCTTTAAACC
CAGTGAATCCGGATAACGCTTGCACCCTCCGTATT
>OTU_144
GGACTACTGGGGTTTCTAATCCTGTTCGCTACCCATGCTTTCGCTCCTCAGCGTCAGTTACTACCCAGAGACCTGCCTTC
GCCATCGGTGTTCTTCCTGATATCTGTGCATTCCACCGCTACACCAGAAATTCCAGTCTCCCCTGTAGTACTCAAGTCAG
CCCGTATCGCCTGCACGTCCAGGGTTAAGCCCTAGGATTTCACAGACGACGTGACAAACCGCCTACGAGCTCTTTACGCC
CAGTAATTCCGGACAACGCTCGCACCCTACGTATT
>OTU_145
GGACTACTGGGGTTTCTAATCCTGTTTGCTCCCCACGCTTTCGCACCTCAGTGTCAGTATCAGTCCAGGTGGTCGCCTTC
GCCACTGGTGTTCCTTCCTATATCTACGCATTTCACCGCTACACAGGAAATTCCACCACCCTCTACCGTACTCTAGCTCA
GTAGTTTTGGATGCAGTTCCCAGGTTGAGCCCGGGGATTTCACATCCAACTTGCTGAACCACCTACGCGCGCTTTACGCC
CAGTAATTCCGATTAACGCTTGCACCCTTCGTATT
>OTU_146
GGACTACTGGGGTTTCTAATCCTGTTTGATCCCCACGCTTTCGTGCCTCAGTGTCAATGACTCCGTAGTAAGCTGCCTTC
GCAATTGGTGTTCTATGTCATATCTAAGCATTTCACCGCTACATGACATATTCCGCTTACCTCCAGAGTATTCAAGACAG
ATAGTATCAATGGCAGTTTCCGGGTTAAGCCCGGAGATTTCACCGCTGACTTAACTGCCCACCTACGCACCCTTTAAACC
CAGTGAATCCGGATAACGCTTGCACCCTCCGTATT
>OTU_147
GGACTACCGGGGTTTCTAATCCTGTTCGCTACCCATGCTTTCGCTCCTCAGCGTCAGTTACTGCCCAGAGACCTGCCTTC
GCCATCGGTGTTCCTCCTGATATCTGCGCATTCCACCGCTACACCAGGAATTCCAGTCTCCCCTACAGCACTCAAGTTAT
GCCCGTATCGCCTGCAGTCCCGCAGTTAAGCTGCGGGCTTACACAAACGACGCGACAAACCACCTACGAGCTCTTTACGC
CCAGTAATTCCGGACAACGCTCGCACCCTACGTAT
>OTU_148
GGACTACCGGGGTTTCTAATCCTGTTTGCTCCCCACGCTTTCGAGCCTCAACGTCAGTTACTGTCCAGTAAGCCGCCTTC
GCCACTGGTGTTCCTCCTAATATCTACGCATTTCACCGCTACACTAGGAATTCCACTTACCTCTCCAGCACTCTAGATGA
ACAGTTTCCAATGCAGTCCCGGGGTTGAGCCCCGGGTTTTCACATCAGACTTGCCCATCCGTCTACGCTCCCTTTACACC
CAGTAAATCCGGATAACGCTTGCACCATACGTATT
>OTU_149
GGACTACCCGGGTATCTAATCCTGTTTGCTCCCCACGCTTTCGAGCCTCAACGTCAGTTACTGTCCAGTAAGCCGCCTTC
GCCACTGGTGTTCCTCCTAATATCTACGCATTTCACCGCTACACTAGGAATTCCACTTACCTCTCCAGCACTCTAGCAAG
GCAGTTTCCAAAGCAGTCCCGGGGTTGAGCCCCGGGCTTTCACTTCAGACTTGTCTCGCCGTCTACGCTCCCTTTACACC
CAGTAAATCCGGATAACGCTTGCCCCCTACGTATT
>OTU_150
GGACTACTGGGGTTTCTAATCCCGTTTGCTACCCTAGCTTTCGCGCTTTAGTGTCAGGATCGGTCCAGGTGGCCGCTTTC
GCCACTGGTGTTCCTCCGCATCTCTACGCATTTCACCACTCCATGCGGAATTCCACCACCCTCTACCGACCTCAAGCCCT
GCAGTATCGGACAACCTCTCCCCGTTAGGCGAGGAGATTTCATGCCCGACTTGCGAGGCCACCTGCGCGCGCTTTACGCC
CAGTAAATCCGGATAACGTTCGCCACCTACGTTTT
>OTU_151
GGACTACCGGGGTTTCTAATCCTGTTTGCTCCCCACGCTTTCGTGCCTCAGTGTCAGTTGCTGTCCAGATAGTCGCCTTC
GCCACTGATGTTCCTCCTAATATCTACGCATTCCACCGCTACACTAGGAATTCCACTATCCTCTCCAGTACTCAAGTCTA
ACAGTTTTAGATGCAGCACCCGAGTTAAGCCCTGGGTATTACACATCTAACTTATCAAACCACCTACACACCCTTTACGC
CCAGTCATTCCGGACAACGCTCGCCCCCTACGTAT
>OTU_152
GGACTACTAGGGTTTCTAATCCTGTTTGCTCCCCACGCTTTCGAGCCTCAACGTCAGTTATCGTCCAGTAAGTCGCCTTC
GCCACTGGTGTTCCTCCTAATATCTACGCATTTCACCGCTACACTAGGAATTCCACTTACCTCTCCGACACTCCAGTTAA
ACAGTTTCCAAAGCAGTCCCGCAGTTGAGCCGCGGGCTTTCACTTCAGACTTGCTTTACCGTCTACGCTCCCTTTACACC
CAGTAAATCCGGATAACGCTTGCCCCCTACGTATT
>OTU_153
GGACTACTAGGGTTTCTAATCCTGTTCGCTCCCCACGCTTTCGAGCCTCAGCGTCAATCATAGCCCAGAAAGTCGCTTTC
GCCACTGGTGTTCCTCCATATATCTACGCATTCCACCGCTACACATGGAATTCCACTTTCCTCTGCTACATTCAAGTCCG
CCAGTTTCCAATGCCGTTCCACGGTTGAGCCGTGGGCTTTCACATCAGACTTACCGGACCGCCTGCGCTCGCTTTACGCC
CAATAAATCCGGACAACGCTTGTCACCTACGTATT
>OTU_154
GGACTACACGGGTTTCTAATCCTGTTTGCTCCCCACGCTTTCGAGCCTCAACGTCAGTCATCGTCCAGTAAGCCGCCTTC
GCCACTGGTGTTCCTCCCAATATCTACGCATTTCACCGCTACACTGGGAATTCCACTTACCTCTCCGACACTCTAGCTGC
ATAGTTTCCAAAGCAGTCCCGGGGTTGAGCCCCGGGCTTTCACTTCAGACTTACACAGCCGTCTACGCTCCCTTTACACC
CAGTAAATCCGGATAACGCTTGCACCATACGTATT
>OTU_155
GGACTACTCGGGTTTCTAATCCCATTTGCTACCCTGGCTTTCGTTCCTCAGTGTCAATTACGGCCCAGTAAAGCGCTTAC
GCCACCGATGTTCCTCCTGATATCTACGCATTTCACCGCTACACCAGGAATTCCCTTTACCTCTACCGCATTCTAGTCTG
CCAGTATCCGATGCCGAACAGAAGTTGAGCCTCTGCATTTAACACCAAACTTAACAAACCACCTACGAACTCTTTACGCC
CAATGATTCCGGACAACGCTTGCACCCTCCGTATT
>OTU_156
GGACTACTAGGGTTTCTAATCCCGTTCGCTCCCCTGGCTTTCGAGCCTCAGCGTCAGTTGCAGTCCAGAAAGCCGCCTTC
GCCACTGGTGTTCCTCCCAATATCTACGCATTTCACCGCTACACTGGGAATTCCGCTTTCCTCTCCTGTACTCAAGACAT
ATAGTTTCTTTCCCATCACGGGGTTGAGCCCCGAACTTTTAAAAAAGACTTATATGCCCGCCTGCGCTCCCTTTACGCCC
AATGATTCCGGACAACGCTCGCCACCTACGTATTA
>OTU_157
GGACTACCCGGGTTTCTAATCCTGTTTGCTACCCACGCTTTCGCACCTCAGTGTCAATGTTGGTCCAGGAAGTCGCCTTC
GCCACTGATGTTCCTTCCGATCTCTATGCATTTCACCGCTACACCGGAAATTCCACTTCCCTCTCCCACATTCTAGTCTA
CCAGTATCAGATGACCTGCCTAGGTTGAGCCCAGGGATTTCACATCTGACTTAATAAACCACCTACGTGCGCTTTACGCC
CAGTAATTCCGATTAACGCTTGCACCCTCCGTATT
>OTU_158
GGACTACCGGGGTTTCTAATCCGGTTCGCGCCCCTGGCTTTCGTCCCTCACCGTCAGGATCGTTCCAGTTAGCCGCCTTC
GCCACAGGTGGTCCTCCCAGGATTACAGGATTTCACCCCTACCCTGGGAGTACCGCTAACCTCTCCCGACCTCAAGTCTA
ATAGTATCCCCAGCAATTCCCATAGTTAAGCTACAGGATTTCACCAAAGACTTAAAAAACCGGCTACGGACGCTTTAGGC
CCAATAAAACTGGCTACCACTCGAGCTGCCGGTGT
>OTU_159
GGACTACCCGGGTTTCTAATCCTGTTCGCTCCCCACGCTTTCGAGCCTCAGCGTCAGTTACAGACCAGAGAGCCGCTTTC
GCCACCGGTGTTCCTCCATATATCTACGCATTTCACCGCTACACATGGAATTCCACTCTCCCCTTCTGCACTCAAGTTTG
ACAGTTTCCAAAGCGAACTATGGTTGAGCCACAGCCTTTAACTTCAGACTTATCAAACCGCCTGCGCTCGCTTTACGCCC
AATAAATCCGGACAACGCTCGGGACCTACGTATTA
>OTU_160
GGACTACTCGGGTTTCTAATCCTGTTTGCTCCCCACACTTTCGAGCCTCAGCGTCAGTTAAAGCCCAGTTGGCCGCCTTC
GCCACCGGTGTTCCTCCGAATATCTACGCATTTCACCGCTACACTCGGAATTCCGCCAACCTCTACTTCACTCAAGAATA
CCAGTTTCAACTGCAGTCTACGGGTTAAGCCCATAGTTTTCACAGCTGACTTGGCATCCCGCCTACGCTCCCTTTACACC
CAGTAATTCCGGACAACGCTTGCCACCTACGTATT
>OTU_161
GGACTACCGGGGTTTCTAATCCTGTTTGCTCCCCACGCTTTCGAGCCTCAGCGTCAGTTACAGACCAGAGAGCCGCCTTC
GCCACTGGTGTTCCTCCATATATCTACGCATTTCACCGCTACACATGGAATTCCGCTCTCCTCTTCTGCACTCAAGTCTC
CCAGTTTCCAATGACCCTCCACGGTTGAGCCGTGGGCTTTCACATCAGACTTAAAAGACCGCCTACACTCCCTTTACGCC
CAATAAATCCGGACAACGCTCGCCACCTACGTATT
>OTU_162
GGACTACCGGGGTTTCTAATCCGGTTCGCTACCCCAGCTCTCGCGCATGAGCGTCAGTTACTGGCCAGAAAGCCGCCTTC
GCCACCGGTGTTCCTCCCGATATCTACGCATTTCACCGCTACACCGGGAATTCCACTTCCCTCTCCAGTACTCAAGCCAT
GCAGTATCCGCCGCAAGACACCGGTTGAGCCGATGCTTTTCACAGCAGACTTACATGACCGCCTGCGCGCCCTTTACGCC
CAGTAATTCCGGACAACGCTCGCCCCCTACGTGTT
>OTU_163
GGACTACTGGGGTTTCTAATCCTGTTTGCTCCCCACGCTTTCGTGCCTCAGCGTCCGATATAGATTTGTAAGCTGCCTTC
GCAATCGGTGTTCTGTGTGATCTCTATGCATTTCACCGCTACACCACACATTCCGCCTACAGCATCTACTCGCTAGCAAA
CCAGTATCAGAGGCAGTGCCAAGGTTGAGCCTCGGAATTTCACCTCTAACTTAATCTGCCGCCTACGCACCCTTTAAACC
CAATAAATCCGGATAACGCTTGGATCCTCCGTATT
>OTU_164
GGACTACCGGGGTTTCTAATCCTGTTTGCTCCCCACGCTTTCGCACCTGAGCGTCAGTCTTTGTCCAGGGGGCCGCCTTC
GCCACCGGTATTCCTCCAGATCTCTACGCATTTCACCGCTACACCTGGAATTCTACCCCCCTCTACAAGACTCTAGTCAG
ACAGTTTCAAATGCAGTTCCCAGGTTGAGCCCGGGGCTTTCACATCTGACTTATCTAACCGCCTGCGTGCGCTTTACGCC
CAGTTATTCCGATTAACGCTTGCACCCTCCGTATT
>OTU_165
GGACTACCGGGGTTTCTAATCCCAGTTTGGGTCTTAGCTATTGTGTGTTCAGATATGTTAAAGCCACTTTCGTAGTCTAT
TTTGTGTCAACTGGAGTTTTTTACAACTCAGGTGAGTTTTAGCTTTATTGGGGAGGGGGTGATCTAAAACACTCTTTACG
CCGGCTTCTATTGACTTGGGTTAATCGTGTTACCGCGGCGGCTGGCACCTGTCTCTTATACACATCTCCGAGCCCACGAG
ACACTCGCTAATCTCGTATGCCGTCTTCTGCTTGA
>OTU_166
GGACTACTGGGGTTTCTAATCCTGTTTGCTACCCACGCTTTCGTACCTCAGCGTCAGTTTGAGTCCAGAGAGCCGCCTTC
GCCACTGGTGTTCCTTCAGATCTCTACGCATTTCACCGCTACACCTGAAATTCCACTCTCCTCTACTCAACTCTAGTCAT
CCAGTATCAAATGCAGTTCCCAGGTTAAGCCCGGGGCTTTCACATCTGACTTAAATAACCGCCTACGCACGCTTTACGCC
CAGTAATTCCGATTAACGCTTGCACCCTCCGTATT
>OTU_167
GGACTACTCGGGTTTCTAATCCTGTTTGCTCCCCACGCTTTCGTGCATGAGCGTCAGTACAGGCCCAGGGGGCTGCCTTC
GCCATCGGTGTTCCTCCTGATCTCTACGCATTTCACTGCTACACCAGGAATTCCACCCCCCTCTACCGTACTCTAGCCCT
GCAGTCACCAGCGCAATTCCCAGGTTGAGCCCGGGGATTTCACACCGGTCTTACAGGGCCGCCTGCGCACCCTTTACGCC
CAGTAATTCCGATTAACGCTCGCACCCTACGTATT
>OTU_168
GGACTACCGGGGTTTCTAATCCTGTTTGCTCCCCACGCTTTCGTACATGAGCGTCAGTCACATCCCAGGGGGCTGCCTTC
GCCATCGGTGTTCCTCCACATCTCTACGCATTTCACTGCTACACGTGGAATTCCACCCCCCTCTGACAAACTCTAGCCAT
GCAGTCACAAATGCAGTTCCCAGGTTAAGCCCGGGGATTTCACATCTGTCTTGCATGGCCGCCTGCGTACGCTTTACGCC
CAGTAATTCCGATTAACGCTTGCACCCTACGTATT
>OTU_169
GGACTACCGGGGTTTCTAATCCGGTTTGCTCCCCTAGCCTTCGTCCCTCACCGTCGGAGTCGTTCTAGCGAGACGCTTTC
GCCACCGGTCGTCCCCCCAGGATTACAGGATTTTACCCCTACCCCAGGAGTACCTCTCGCTTCACCCGATCCCCAGTCTT
GCAGTCTCTCCAGCATTCCCACCGTTAAGCGGCAGGATTTACCCAGAGATTTACAAGACCGGCTACGGACGCTTTAGGCT
CAATAATAGTGGCCACCACTTGAGCTGCGGGTATT
>OTU_170
GGACTACTCGGGTTTCTAATCCTGTTTGCTCCCCACGCTTTCGTCCATCAGCGTCAATAAACCATTAGTAACCTGCCTTC
GCAATTGGTATTCCATGTAATATCTAAGCATTTCACCGCTACACTACATATTCTAGTTACTTCACAGTAATTCAAGTCAA
ACAGTATCAATGGCAGTTCGACAGTTAAGCTGCCGGATTTCACCACTGACTTATCTAACCGCCTACGGACCCTTTAAACC
CAATGATTCCGGATAACGCTTGGATCCTCCGTATT
>OTU_171
GGACTACTAGGGTTTCTAATCCTGTTTGCTCCCCACGCTTTCGCGCCTCAGCGTCAGTTGTCGTCCAGCAAGCCGCCTTC
GCCACTGGTGTTCCTCCTAATATCTACGCATTTCACCGCTACACTAGGAATTCCGCTTGCCTCTCCGATACTCAAGGGAT
ACAGTTTTGAGAGCAGTTCATGGGTTGAGCCCATGGATTTCACTCCCAACTTGCATCTCCGCCTACACGCCCTTTACACC
CAGTAAATCCGGACAACGCTTGCAACCTACGTATT
>OTU_172
GGACTACTAGGGTTTCTAATCCTGTTCGCTCCCCATGCTTTCGCTCCTCAGCGTCAGTTACTGCCCAGAGACCTGCCTTC
GCCATCGGTGTTCCTCCTGATATCTGCGCATTCCACCGCTACACCAGGAATTCCAGTCTCCCCTACAGCACTCAAGTTAT
GCCCGTATCGCCTGCACGCCCGAAGTTAAGCCCCGGAATTTCACAGACGACGCGACAAACCACCTACGAGCTCTTTACGC
CCAGTAATTCCGGACAACGCTCGCACCCTACGTAT
>OTU_173
GGACTACTGGGGTTTCTAATCCTGTTTGCTCCCCACGCTTTCGCACCTCAGCGTCAGTATCAGTCCAGCGAGTCGCCTTC
GCCACTGGTGTTCCACCGAATATCTACGAATTTCACCTCTACACTCGGTATTCCACTCGCCTCTCCTGACCTCCAGGCTT
GCAGTTTAGAAGGCAGTTCCAGGGTTGAGCCCTGGGATTTCACCCCCTACTTACAAACCCGCCTACGTGCGCTTTACGCC
CAGTAATTCCGAACAACGCTAGCCCCCTTCGTATT
>OTU_174
GGACTACCCGGGTTTCTAATCCTGTTTGCTCCCCACGCTATCGCGCCTCAGCGTCAGTAATGGACCAGCTCGCCGCCTTC
GCCACCGGTGTTCTTCCCAATATCTACGAATTTCACCTCTACACTGGGAATTCCACGAGCCTCTTCCATCCTCAAGCACA
CCAGTCTTAAGCGCAGTCCCCAGGTTGAGCCCAGGGCTTTCACGCCTAACTTGGTGCGCCGCCTACGCGCCCTTTACGCC
CAGTAATTCCGAGTAACGCTAGCCCCCTTCGTATT
>OTU_175
GGACTACTCGGGTTTCTAATCCTGTTTGCTCCCCACGCTTTCGCGCCTCAGCGTCAGTTTCAGTCCAGAAAGCCGCCTTC
GCCACTGGTGTTCCTACCGATCTCTACGCATTTCACCGCTACACCGGTAATTCCGCTTTCCTCTCCTGCACTCCAGCCCA
CCAGTATCCAAAGCAATTCCCACCTTGAAAGCAGGACTTTCACTCCAGACTTAGCAGGCCGCCTACGCGCCCTTTACGCC
CAATCATTCCGGACAACGCTCGCCCCCTACGTATT
>OTU_176
GGACTACCGGGGTTTCTAATCCTGTTTGCTCCCCCGGCTTTCGTGCCTCAGTGTCAGGAATGGTCCAGAGACTCGCCTTC
GCCACCGGTGTCCCTCTCGATATCTACGCATTTCACTGCTACACCGAGAATTCCAGTCTCCCCTCCCATCCTCTAGCCGA
CCAGTTTCGGGCGCACCCTCCGGGTTGAGCCCGGAGATTTCACACCCGACTTAGTCGGCCACCTACGCACCCTTTACGCC
CAGTGAATCCGAACAACGCTTGGGACCTCTGTATT
>OTU_177
GGACTACCGGGGTTTCTAATCCTGTTTGCTCCCCACGCTTTCGTGCCTCAACGTCAGATATAGCTTGGTAAGCTGCCTTC
GCAATCGGTGTTCTGTATGATCTCTAAGCATTTCACCGCTACACCATACATTCCGCCTACCGCAACTACTCTCTAGTCAA
ACAGTATTAGAGGCAGCGCCGGTGTTAAGCACCGGAATTTCACCTCTAACTTATCTAACCGCCTACGCACCCTTTAAACC
CAATAAATCCGGATAACGCTTGAATCCTCCGTATT
>OTU_178
GGACTACTGGGGTTTCTAATCCTGTTTGCTCCCCACGCTTTCGTGCCTCAGCGTCAGTTAAGGCCCAGCAAGCCGCCTTC
GCCACCGGTGTTCCTCCATATATTTACGCATTTTACCGCTACACATGGAATTCCACTTGCCTCTACCTTACTCAAGTTAG
CCAGTTTCTAAAGCCTCCCATGGTTGAGCCATGAGCTTATACCTTAAACTTAACTTACCGCCTACGCACCCTTTACGCCC
AATAATTCCGGATAACGCTTGCCCCCTATGTATTA
>OTU_179
GGACTACTGGGGTTTCTAATCCTGTTTGCTCCCCACGCTTTCGAGCCTCAGCGTCAGTTTCAGTCCAGAAAGCCGCCTTC
GCCACTGGTGTTCTTCCTAATATCTACGCATTTCACCGCTACACTAGGAATTCCGCTTTCCTCTCCTGTACTCTAGCTTG
ATAGTTCCAAATGCAATCCTCGGGTTAAGCCCAAGGCTTTCACATCTGGCTTACCATGCCGCCTACGCTCCCTTTACACC
CAGTAATTCCGGATAACGCTTGCCCCCTACGTATT
>OTU_180
GGACTACTCGGGTTTCTAATCCTGTTTGCTCCCCACGCTTTCGCGCCTCAGCGTCAGTTCTAAGCCAGGAAGTTGCTTTC
GCCATCGGTATTCCTCCTGATCTCTACGCATTTCACCGCTACACCAGGAATTCCACTTCCCTCTCCTAGCCTCAAGTCCC
CCAGTTTCCAATGACCTTCCGCGGTTAAGCCGCGGGCTTTTACATCAGACTTAAAGGACCGCCTGCGCGCGCTTTACGCC
CAATCATTCCGGACAACGCTCGCCCCCTACGTATT
>OTU_181
GGACTACCAGGGTTTCTAATCCCATTTGCTACCCCGGCTTTCGTTCCTCAGTGTCAATTACGGCCCAGTAAAGCGCTTAC
GCCACCGATGTTCCTCCTGATATCTACGCATTTCACCGCTACACCAGGAATTCCCTTTACCTCTACCGCATTCCAGCTTG
CAAGTATCCAGTGCCCTACAGAAGTTGAGCTTCTGCCTTTAACACCAGACTTTACATGCCACCTACGAACTCTTTACGCC
CAATGATTCCGGACAACGCTTGCACCCTCCGTATT
>OTU_182
GGACTACCAGGGTTTCTAATCCTGTTTGCTCCCCACGCTTTCGAGCCTCAACGTCAGTTACCGTCCAGTAAGCCGCCTTC
GCCACTGGTGTTCCTCCTAATATCTACGCATTTCACCGCTACACTAGGAATTCCGCTTACCTCTCCGGTACTCTAGATTG
ACAGTTTCCAATGCAGTCCCGGGGTTGAGCCCCGGGTTTTCACATCAGACTTGCCACTCCGTCTACGCTCCCTTTACACC
CAGTAAATCCGGATAACGCTTGCACCATACGTATT
>OTU_183
GGACTACTCGGGTTTCTAATCCTGTTTGCTCCCCACACTTTCGCGCCTCACCGTCAGTTATCGTCCAGCAATCCGCCTTC
GCCACTGGTGTTCCTCCTAATATCTACGCATTTCACCGCTACACTAGGAATTCCGATTGCCCCTCCGACACTCAAGATCT
ACAGTTTCAAATGCAGTTCATGGGTTGAGCCCATGGATTTCACATCTGACTTGCAGACCCGGCTGCACGCCCTTTACACC
CAGTAAATCCGGACAACGCTTGCCACCTACGTATT
>OTU_184
GGACTACCGGGGTTTCTAATCCTGTTTGCTCCCCACGCTTTCGTTCCTCAGCGTCAGTATAAGTCCAGAAAGTCGCCTTC
GCCACTGGTATTCCTCCTAATATCTACGCATTTCACCGCTACACTAGGAATTCCACTTTCCTCTCCTTAACTCAAGCCAA
TCAGTTTCAAATGCTTACCACGGTTAAGCCGTGGGATTTCACATCTGACTTAATCGGCCGCCTGCGAACCCTTTACGCCC
AATAATTCCGGACAACGCTCGCCCCCTACGTATTA
>OTU_185
GGACTACTAGGGTTTCTAATCCTGTTTGATCCCCATGCTTTCGTGCCTCAGCGTCAGTATATGGCCAGATAGCCGCCTTC
GCCACCGGTGTTCTACCCAATATCTACGAATTTCACCTCTACACTGGGTATTCCGCTATCCTCTCCATAACTCTAGCTAC
ATAGTTATAACGGCTATTCCGAGGTTAAGCCCCGGGATTTCACCGCTATCTTACATAACCGCCTACACACCCTTTACGCC
CAGTAATTCCGAACAACGCTCGCCCCCTTCGTATT
>OTU_186
GGACTACCGGGGTTTCTAATCCTGTTTGCTCCCCACGCTTTCGCACCTCAGCGTCAGAACCGGACCAGTGAGCCGCCTTC
GCCACTGGTGTTCTTCCTAATATCTACGCATTTCACTGCTACACGCGGAATTCCATCCCCCTCTGCCGCACTCCAGCTTT
GCAGTCACAAGCGCCATTCCCAGGTTGAGCCCGGGGATTTCACGCCTGTCTTACAAAACCGCCTGCGCACGCTTTACGCC
CAGTAATTCCGATTAACGCTTGCACCCTACGTATT
>OTU_187
GGACTACTGGGGTTTCTAATCCTGTTTGATCCCCACGCTTTCGTGCCTCAGCGTCAGTGTCGGCTCAGTAAGCTGCCTAC
GCAATTGGTGTTCTGTGTAATATCTAAGCATTTCACCGCTACATTACACATTCCGCCTACCTTAACCAAACTCAAGACTA
TCAGTATCAACGGCAGTTCTGCAGTTAAGCTGCAGGATTTCACCACTGACTTAATAGCCCGCCTACGCACCCTTTAAACC
CAATGAATCCGGATAACGCTTGCATCCTCCGTATT
>OTU_188
GGACTACTCGGGTTTCTAATCCTGTTCGATACCCGCACTTTCGAGCTTCAGCGTCAGTTACGCTACTGCAAGCTGCCTTC
GCAATCGGAGTTCTTCGTCATATCTAAGCATTTCACCGCTACACGACGAATTCCGCCTGCATTCCGCGCACTCAAGTCTC
CCAGTTCGCGCTGCACCTCTGTCGTTGAGCGACAGTATTTCACAACACGCTTAAAAAACGGCCTACGCTCCCTTTAAACC
CAATAAATCCGGATAACGCCCGGACCTTCCGTATT
>OTU_189
GGACTACTGGGGTTTCTAATCCTGTTTGATCCCCACGCTTTCGAGCCTCAGTGTCAATAATCCCGTAGTAAGCTGCCTTC
GCAATTGGTGTTCTATGTCATATCTAAGCATTTCACCGCTACATGACATATTCCGCTTACCTCCAGGATATTCAAGACAA
ATAGTATCAATGGCAGTTTCCGGGTTAAGCCCGGAGATTTCACCACTGACTTACCTGCCCACCTACGCTCCCTTTAAACC
CAGTGAATCCGGATAACGCTTGCACCCTCCGTATT
>OTU_190
GGACTACTAGGGTTTCTAATCCTGTTTGCTCCCCACGCTTTCGAGCCTCAACGTCAGTTACTGTCCAGTAAGCCGCCTTC
GCCACTGGTGTTCCTCCTAATATCTACGCATTTCACCGCTACACTAGGAATTCCGCTTACCTCTCCAGCACTCCAGTCAA
ACAGTTTCAAAAGCAGTCCCGGGGTTGAGCCCCAGCCTTTCACTTCTGACTTGCTTGACCGTCTACGCTCCCTTTACACC
CAGTAAATCCGGATAACGCTTGCCCCCTACGTATT
>OTU_191
GGACTACCGGGGTTTCTAATCCTGTTTGCTCCCCACGCTTTCGAGCCTCAACGTCAGTTACCGTCCAGTAAGCCGCCTTC
GCCACTGGTGTTCTTCCTAATATCTACGCATTTCACCGCTACACTAGGAATTCCGCTTACCTCTCCGGCACTCGAGCCAG
ACAGTTTCCAATGCAGTCCCAGGGTTAAGCCCTGGGTTTTCACATCAGACTTGCCTTGCCGTCTACGCTCCCTTTACACC
CAGTAAATCCGGATAACGCTTGCCCCCTACGTATT
>OTU_192
GGACTACCGGGGTTTCTAATCCTGTTCGCTCCCCACGCTTTCGCACCTCAGCGTCAGTATTTGTCCAGCAAGCCGCCTTC
GCCACTGGTGTTCCTCCTAATATCTACGCATTTCACCGCTACACTAGGAATTCCACTTGCCTCTCCAATACTCAAGTCTA
CCAGTTTCCAATGCACTTCACCGGTTGAGCCGGTACCTTTCACATCAGACTTAATAGACCGCCTACGCGCCCTTTACGCC
CAGTCATTCCGGACAACGCTTGTCCCCTACGTATT
>OTU_193
GGACTACCGGGGTTTCTAATCCTGTTTGCTCCCCTAGCTTTCGTGCCTCAGTGTCAGTAATGGTCCAGTGAGCCGCTTTC
GCCACAGGTGTTCCTTCCGATATCTACGCATTTCACCGCTACACCGGAAATTCCACTCACCTCTCCCATACTCAAGCCCG
GCAGTTTCTTATGCAGACTTCAAGTTGAGCCTGAAGATTTCACACAAGACTTGCCGAACCACCTACGCACCCTTTACGCC
CAATAATTCCGATTAACGCTCGCACCCCCCGTATT
>OTU_194
GGACTACCGGGGTTTCTAATCCGGTTCGTGCCCCTAGCTTTCGTCCCTTGCCGTCAGGTCCGTTCTGGTGAGACGCCTTC
GCCACTGGTGGTCCTTCAAGGATTACAAGATTTCACCCCTACCCCTGAAGTACCTCTCACCTCTCCCGGCCTCGAGCCAG
ACAGTATCCCCTGAAAGCCTGACAGTTGAGCTGCCAGATTTCCCAAGAGACTTATCCGGCCGGCTACAGACCCTTTAGAC
CCAATAATAACGGTTACCACTCGAGCCGCCGGTGT
>OTU_195
GGACTACCAGGGTTTCTAATCCTGTTTGATCCCCATGCTTTCGAGCCTCAGCGTCAATATACAGCCAGATAGTCGCCTTC
GCCACTGGTGTTCTACCCAATATCTACGAATTTCACCTCTACACTGGGTATTCCACTATCCTCTCTGTAATTCTAGCCAC
ATAGTCATAATGGCAATTCCAAAGTTAAGCTCTGGGATTTCACCACTATCTTACATAACCGCCTACACTCCCTTTACGCC
CAGTAATTCCGAACAACGCTTGCCCCCTTCGTATT
>OTU_196
GGACTACTAGGGTTTCTAATCCTGTTTGCTCCCCACGCTTTCGAGCCTCAACGTCAGTTACCGTCCAGTAAGCCGCCTTC
GCCACTGGTGTTCCTCCTAATATCTACGCATTTCACCGCTACACTAGGAATTCCGCTTACCTCTCCGGCACTCAAGACTA
ACAGTTTCCAATGCAGTCCAGGGGTTGAGCCCCCGCCTTTCACATCAGACTTGCCAGTCCGTCTACGCTCCCTTTACACC
CAGTAAATCCGGATAACGCTTGCCCCCTACGTATT
>OTU_197
GGACTACCGGGGTTTCTAATCCTGTTTGCTACCCATGCTTTCGAGCCTCAGCGTCAGTTAGTGCCCAGTAGGCCGCCTTC
GCCACTGGTGTTCCTCCCGATATCTACGCATTCCACCGCTACACCGGGAATTCCGCCTACCTCTACACCACTCAAGAAAA
ACAGTTTTGAAAGCAATTTGTGGGTTGAGCCCACAGATTTCACTCCCAACTTGCTCTCCCGCCTGCGCTCCCTTTACACC
CAGTAATTCCGGACAACGCTTGCCACCTACGTTTT
>OTU_198
GGACTACTAGGGTTTCTAATCCTGTTCGCTCCCCCGGCTTTCGCACTTCAGCGTCAGTTACCGTCCAGTGAACTATCTTC
ATCATCGGCATTCCTGCACATATCTACGAATTTCACCTCTACTCGTGCAGTTCCGTCCACCTCTCCGGTACTCCAGCCTA
TCAGTTTCAAAGGCAGGCCTGCGGTTGAGCCGCAGGTTTTCACCCCTGACTTGAAAGGCCGCCTAGATGCCCTTTATGCC
CAATAATTCCGGATAACGCTCGCGACATACGTATT
>OTU_199
GGACTACTGGGGTTTCTAATCCTGTTTGATCCCCACACCTTCGCAGTTAAGCGTCAATTACGGCCTAGAAGACTGCCTTC
GCCTTCGGTATTCCTCCTGATCTCTGCGCATTCCACCGCTACACCAGGAATTCTGTCTTCCCCTACCGCATTCCAGACCT
ACAGTATCTCCTGCTCTACTACAGTTGAGCCGTAGCCTTTAACAAAAAACTCGTAGATCCGCCTACCTGCCCTTTACGCC
TAGTAATTCCGGACAACGCTCGCAACCCCCGTGTT
>OTU_200
GGACTACCCGGGTTTCTAATCCTGTTTGCTCCCCACGCTTTCGAGCCTCAACGTCAGTTACTGTCCAGTAAGCCGCCTTC
GCCACTGGTGTTCTTCCTAATATCTACGCATTTCACCGCTACACTAGGAATTCCGCTTACCTCTCCAGCACTCTAGCAAC
ACAGTTTCCAAAGCAGTTCCCAGGTTGAGCCCGGGTATTTCACTTCAGACTTGCGTCGCCGTCTACGCTCCCTTTACACC
CAGTAAATCCGGATAACGCTTGCCCCCTACGTATT
>OTU_201
GGACTACCGGGGTTTCTAATCCTGTTTGCTCCCCACGCTTTCGTGCATGAGCGTCAGTGCAGGCCCAGGGGATTGCCTTC
GCCATCGGTGTTCCTCCGCATATCTACGCATTTCACTGCTACACGCGGAATTCTATCCCCCTCTGCCGCACCCAAGCCAT
GCAGTCACAAGTGCAGTTCCCAGGTTAAGCCCGGGGATTTCACATCTGACTTGCCAAGCCGCCTACACGCGCTTTACGCC
CAATAATTCCGAACAACGCTTGCACCCTCTGTATT
>OTU_202
GGACTACCGGGGTTTCTAATCCTGTTTGATACCCACGCTTTCGTGCTTCAGTGTCAGTTGTAATGTAGTACGCTGCCTGC
GCAATCGGAGTTCTGTGTGATATCTATGCATTTCACCGCTACACCACACGTTCCACGTACCTCCAGTACACTCTAGCTAG
AGAGTTTCAAAGGCAAGACCATAGTTGAGCTACAGCTTTTCACCCCTGACTTCCCTTGCAACCTACGCACCCTTTAAACC
CAATAATTCCGGATAACGCTCGCATCCTCCGTATT
>OTU_203
GGACTACTGGGGTTTCTAATCCTGTTTGCTCCCCACGCTTTCGCATCTCAGCGTCAATAATGTTCCAGTAGATCGCCTTC
GCAATCGGTATTCCTTCTGATCTCTACGGATTTTACCCCTACACCAGAAATTCCATCTACCTCTCCCACATTCTAGATTA
ACAGTTTTCAAAGCAGTTCTATAGTTAAGCTATAGGATTTCACTTCAAACTTATTAATCCGCCTACATGCTCTTTACGCC
CAGTGATTCCGAGTAACGCTTGCACCCCCCGTATT
>OTU_204
GGACTACCCGGGTTTCTAATCCCGTTCGCTACCCTGGCTTTCGCATCTCAGCGTCAGACACAGTCCAGAAAGGCGCCTTC
GCCACTGGTGTTCCTCCCAATATCTACGCATTTCACCGCTACACTGGGAATTCCCCTTTCCTCTCCTGCACTCAAGTCTT
CCAGTATCCAGAGCCATACGGGGTTGAGCCCCGCATTTTCACTCCAGACTTAAAAAACCGCCTACATGCTCTTTACGCCC
AATAATTCCGGACAACGCTCGCCACCTACGTATTA
>OTU_205
GGACTACTCGGGTTTCTAATCCTGTTTGCTCCCCACGCTTTCGTGCCTCAGCGTCAGTGTCAGTCCAGAAAGCCGCCTTC
GCCACCGGTGTTCCTCCTAATATCTACGCATTTCACCGCTACACTAGGAATTCCGCTTCCCTCTCCTGAACTCTAGTTAA
CCAGTTTTGAATGCAGCTCCCAAGTTAAGCCCGGGAATTTCACATCCAACTTAATTAACCGCCTACGCACCCTTTACGCC
CAGTAATTCCGGACAACGCTCGCCCCCTACGTATT
>OTU_206
GGACTACCGGGGTTTCTAATCCTGTTCGCTACCCACGCTTTCGCTCCTCAGCGTCAGTTAAAGCCCAGAGACCCGCCTTC
GCCACCGGTGTTCCTCCTGATATCTGCGCATTTCACCGCTACACCAGGAATTCCAGTCTCCCCTGCTTCACTCTAGTCAA
CCCGTATCGACTGCAGGCCCGAGGTTAAGCCTCGGGATTTCACAGCCGACGTGATAAACCGCCTACGAGCTCTTTACGCC
CAATAATTCCGGACAACGCTTGGACCCTACGTATT
>OTU_207
GGACTACTGGGGTTTCTAATCCTGTTTGCTACCCACGCTCTCGCGTCTCAGCGTCAGTATAGGGCCAGAAAGTCGCCTTC
GCCACCGGTGTTCCTCCTGATATCTACGAATTTCACCTCTACACCAGGAATTCCACTTTCCTCTCCCTTACTCCAGCTGA
ACAGTTTCAAATGCACTTCCTGAGTTAAGCCCAGGGCTTTCACATCTGACTTGTCCAACCGCCTACACGCTCTTTACGCC
CAATAATTCCGAACAACGCTTGCACCCCCCGTATT
>OTU_208
GGACTACTGGGGTTTCTAATCCTATTTGCTCCCCACGCTTTCGTGCTTCAGTGTCAGAATCCAGACCAGACGGCCGCCTT
CGCCACCGGTGTTCTTCCATATATCTACGCATTTTACCGCTACACATGGAGTTCCGCCGTCCTCTTCTGTTCTCTAGCTG
ATCAGTTTCCAGAGCCAGTACGGGTTGAGCCCATACCTTTTACTCCAGACTTGATCTGCCACCTACGCACCCTTTACGCC
CAATCATTCCGGATAACGCTCGCCACCTACGTATT
>OTU_209
GGACTACTGGGGTTTCTAATCCTGTTTGCTCCCCATGCTTTCGTACCTCAGCGTCAGTATTAGGCCAGATGGCTGCCTTC
GCCATCGGTATTCCTCCAGATCTCTACGCATTTCACCGCTACACCTGGAATTCTACCATCCTCTCCCATACTCTAGCCTC
GCAGTTTTGAATGCAATTCCCAAGTTAAGCTCGGGGATTTCACATCCAACTTACGAAGCCGCCTACGCACGCTTTACGCC
CAGTAAATCCGATTAACGCTCGCACCCTCTGTATT
>OTU_210
GGACTACCGGGGTATCTAATCCTGTTTGCTCCCCACGCTTTCGCGCCTCACCGTCAGTTGCCGTCCAGTTATCCGCCTTC
GCCACTGGTGTTCTTCCTTATATCTACGCATTTCACCGCTACACAAGGAATTCCGATAACCTCTCCGGTACTCAAGAAAA
TCAGTTTTAGTTGCAGTTCCTCAGTTAAGCCGAGGGATTTCACAACTAACTTATTCTCCCGTCTACGCACCCTTTACACC
CAATAAATCCGGATAACCCTCGCTCCCTACGTATT
>OTU_211
GGACTACTCGGGTTTCTAATCCTGTTCGCTCCCCACGCTTTCGCGCCTCACCGTCAGTTACCGTCCAGTAATCCGCCTTC
GCCACTGGTGTTCTTCCTTATATCTACGCATTTCACCGCTACACAAGGAATTCCGATTACCTCTCCGGCACTCAAGACAT
ACAGTTTCAAATGCAGTTTCAGGGTTAAGCCCTGAGATTTCACATCTGACTTGCATGCCCGGCTGCACGCCCTTTACACC
CAGTAAATCCGGACAACGCTTGCCACCTACGTATT
>OTU_212
GGACTACTGGGGTTTCTAATCCTGTTTGCTCCCCACGCTTTCGAGCCTCAACGTCAATCACCGTCCAGTAAGCCGCCTTC
GCCACTGGTGTTCCTCCTAATATCTACGCATTTCACCGCTACACTAGGAATTCCGCTTACCTCTCCGGCACTCCAGATCT
GCAGTTTCCAAAGCAGTCCCAGGGTTGAGCCCTGGGTTTTCACTCCAGACTTGCCTATCCGTCTACGCTCCCTTTACACC
CAGTAAATCCGGATAACGCTTGCACCATACGTATT
>OTU_213
GGACTACCCGGGTTTCTAATCCTGTTTGCTCCCCACGCTTTCGAGCCTCAGTGTCAGTTACAGTCCAGCAAGCCGCCTTC
GCCACTGGTGTTCCTCCTAATATCTACGCATTTCACCGCTACACTAGGAATTCCACTTGCCCCTCCTGCACTCTAGCCCT
GCAGTTTCAAAAGCAGTCCCGGGGTTGAGCCCCGGGCTTTCACTTCTGACTTGCCTGGCCACCTACACTCCCTTTACACC
CAGTAAATCCGGATAACGCTTGCTCCATACGTATT
>OTU_214
GGACTACCAGGGTTTCTAATCCTATTTGCTCCCCACGCTTTCGGGACTGAGCGTCAGTTATGCGCCAGATCGTCGCCTTC
GCCACTGGTGTTCCTCCATATATCTACGCATTTCACCGCTACACATGGAATTCCACGATCCTCTCACACACTCTAGCTCT
ACGGTTTCCATGGCTTACCGAAGTTAAGCTTCGATCTTTCACCACAGACCCTTAGTGCCGCCTGCTCCCTCTTTACGCCC
AATAATTCCGGATAACGCTCGCCACCTACGTATTA
>OTU_215
GGACTACTCGGGTATCTAATCCTGTTCGATACCCGCACTTTCGAGCTTCAGCGTCAGTTGCGCTCCCGTGAGCTGCCTTC
GCAATCGGAGTTCTTCGTGATATCTAAGCATTTCACCGCTACACCACGAATTCCGCCCACGTTGTGCGTACTCAAGCAAG
CCAGTTCGCGCTGCAGTGCAGAGGTTGAGCCCCTACATTTCACAACACGCTTAACCTGCGGCCTACGCTCCCTTTAAACC
CAATAAATCCGGATAACGCCCGGACCTTCCGTATT
>OTU_216
GGACTACTGGGGTTTCTAATCCTGTTTGCTCCCCACGCTTTCGTGCCTGAGCGTCAGTTATGTCCCAGGAGGCTGCCTTC
GCCATCGGTGTTCTTCCACATATCTACGCATTTCACTGCTACACGTGGAATTCCACCTCCCTCTGACACACTCTAGTCGA
GCAGTCACATATGCCATTCCCGAGTTAAGCTCGGGGATTTCACATCTGTCTTACTCAACCGCCTGCGCACCCTTTACGCC
CAGTAATTCCGATTAACGCTCGCACCCTACGTATT
>OTU_217
GGACTACCCGGGTTTCTAATCCGGTTTGCTCCCCCAGCTTTCATCCCTCACCGTCGAACGTGTTCTGGTACACCGCCTTC
GCCACAGGTGGTCATCAATAGATCAAAGGATTTTACCCCTTCCTATCGAGTACCGTGTACCTCTCCCACTCCCTAGCTGT
CCAGTATTTTCGGCAGCCTATACGTTAAGCGCATAGATTTAACCGAAAACTTAGACAGCCGGCTACGGATGCTTTAGGCC
CAATAAACCTCCTGACCACTCGAGGTGCTGGTTTT
>OTU_218
GGACTACTCGGGTTTCTAATCCTGTTCGCTCCCCACGCTTTCGTCCATCAGCGTCAATATATTAGTAGTAACCTGCCTTC
GCAATTGGTATTCCATGTAATCTCTAAGCATTTCACCGCTACACTACATATTCTAGTTACTTCCTAATAATTCAAGTTTA
ACAGTATCAATGGCCGTTCCATCGTTGAGCGATGGGCTTTCACCACTGACTTATTAAACCGCCTACGGACCCTTTAAACC
CAATGATTCCGGATAACGCTTGCATCCTCCGTATT
>OTU_219
GGACTACCCGGGTTTCTAATCCTGTTCGCTACCCATGCTCTCGCTCCTCAGCGTCAGTGACTGCCCAGAGACCTGCCTTC
GCCATCGGTGTTCCTCCTGATATCTGCGCATTCCACCGCTACACCAGGAATTCCAGTCTCCCCTACAGCACTCAAGCCAG
CCCGTATCGCCTGCACACCCGGAGTTAAGCCCCAGACTTTCACAGACGACGCGACAAGCCACCTACGAGCTCTTTACGCC
CAGTAAATCCGGACAACGCTCGCACCCTACGTATT
>OTU_220
GGACTACTGGGGTTTCTAATCCCATTTGCTCCCCTAGCTTTCGTCTCTGAGTGTCAGTAATAGCCCAGTAGAGTGCCTTC
GCCATCGGTGTTCTTTCCAATATCTACGCATTTCACCGCTCCACTGGAAATTCCCTCTACCCCTACTATACTCAAGTCTC
CTAGTTTCCACTGCAGATTTGAGGTTGAGCCTCAAGGTTTAACAGTAGACTTAGGAAACCACCTGCAGACGCTTTACGCC
CAGTAATTCCGGATAACACTTGCATCCCCCGTCTT
>OTU_221
GGACTACCCGGGTTTCTAATCCTGTTCGCTACCCATGCTTTCGCTCCTCAGCGTCAGTAACTGCCCAGTAACCTGCCTTC
GCCATCGGTGTTCCTCCTGATATCTGCGCATTTCACCGCTACACCAGGAATTCCAGTTACCCCTACAGTACTCAAGTTAT
GCCCGTATCGCCTGCACGCCCGGAGTTAAGCCCCGGAATTTCACAGACGACGCGACAAACCACCTACGAGCCCTTTACGC
CCAGTAATTCCGGACAACGCTCGCACCCTACGTAT
>OTU_222
GGACTACTGGGGTTTCTAATCCTGTTTGCTCCCCACGCTTTCGCGCCTCAGCGTCAGTTGTCGTCCAGAAAGTCGCCTTC
GCCACCGGTGTTCTTCCTAATCTCTACGCATTTCACCGCTACACTAGGAATTCCACTTTCCTCTCCGATACTCCAGCTTC
CCAGTTTCCATCCCATCACGGGGTTAAGCCCCGCACTTTTAAGATGGACTTAGAAAGCCGCCTGCGCGCGCTTTACGCCC
AATAATTCCGGACAACGCTTGCCACCTACGTATTA
>OTU_223
GGACTACCGGGGTTTCTAATCCTGTTTGATCCCCACACCTTCGCAGTTTAGCGTCAATATCGGCTTAGAAGACTGCCTTC
GCCTTCGGTATTCCTCCTGATCTCTGCGCATTCCACCGCTACACCAGGAATTCTGTCTCCCTCAACCGCATTCCAGATAA
ACAGTATCTAACGCCTTACTACGGGTAAGCCGTAGCCTTTAACCTTAAACTTATCTATCCGCCTACCTGCACTTTACGCC
TAGTAATTCCGGACAACGCTTGCAACCCCCGTGTT
>OTU_224
GGACTACAGGGGTTTCTAATCCTGTTTGCTCCCCACGCTTTCGCGCCTCACCGTCAGTTGCCGTCCAGTTATCCGCCTTC
GCCACTGGTGTTCTTCCTTATATCTACGCATTTCACCGCTACACAAGGAATTCCGATAACCTCTCCGGTACTCAAGACCT
ACAGTTTCAAATGCAGTTTGGAGGTTAAGCCTCCAGATTTCACATCTGACTTGCCGGCCCGGCTGCACGCCCTTTACACC
CAGTAAATCCGGACAACGCTTGCCACCTACGTATT
>OTU_225
GGACTACTCGGGTTTCTAATCCCTTTCGCTCCCCTAGCTTTCGTCCCTCAGTGTCAGTAATGGCCCAGTAACACGCTTTC
GCCGCTGGTGTTCTTCCCAATATCTACGCATTTCACCGCTACACTGGGAATTCCTGTTACCCCTACCATACTCTAGTTCT
ACAGTTTCCACCGCCTGCCCGGAGTTAAGCTCCAGTCTTTGACAGCAGACTTGTGAAACCGCCTGCGGACGCTTTACGCC
CAATAATTCCGGATAACGCTTGCATCCTCCGTATT
>OTU_226
GGACTACCGGGGTTTCTAATCCTGTTTGCTCCCCACGCTTTCGTGCCTCAGCGTCAGTATCGGGCCAGTGAGCCGCCTTC
GCCACTGGTGTTCTTGCGAATATCTACGAATTTCACCTCTACACTCGCAGTTCCACTCACCTCTCCCGAACTCAAGATCT
TCAGTATCAAAGGCAGTTCTGGAGTTGAGCTCCAGGATTTCACCTCTGACTTAAAGACCCGCCTACGCACCCTTTACGCC
CAGTGATTCCGAGCAACGCTAGCCCCCTTCGTATT
>OTU_227
GGACTACTCGGGTTTCTAATCCTGTTTGCTCCCCACGCTTTCGAGCCTCAACGTCAGTTACAGTCCAGTAAGCCGCCTTC
GCCACTGGTGTTCCTCCTAATATCTACGCATTTCACCGCTACACTAGGAATTCCGCTTACCTCTCCTGCACTCAAGCCCA
GCAGTTTCCAATGCAGTTCCGGGGTTGGGCCCCGGGCTTTCACATCAGACTTGCTGTGCCGTCTACGCTCCCTTTACACC
CAGTAAATCCGGATAACGCTTGCCCCCTACGTATT
>OTU_228
GGACTACAGGGGTTTCTAATCCTGTTTGATCCCCGCACTTTCGTGCCTCAGCGTCAGTTGGCCCCTAGTTGGCTGCCTTC
GCTATCGGTGTTCTTGACGATATCTATGCATTTCACCGCTACACCGTCAATTCCGCCAACCTCGCTGCCACTCAAGCCAC
GCAGTATCAATCGCACCCCCCCGGTTGAGCCGGGGTATTTCACAACTGACTTACATGGCCGCCTACGCACCCTTTAAACC
CAATAAATCCGGACAACGCTTGCCACCTACGTATT
>OTU_229
GGACTACCGGGGTTTCTAATCCTGTTTGCTCCCCACACTTTCGCGCCTCACCGTCAGTTGCTGTCCAGCAATCCGCCTTC
GCCACTGGTGTTCCTCCTAATATCTACGCATTTCACCGCTACACTAGGAATTCCGATTGCCTCTCCAGTACTCAAGAAAT
ACAGTTTCAAATGCAGTTCATGGGTTAAGCCCATGGATTTCACATCTGACTTGCATTCCCGGCTGCACGCCCTTTACACC
CAGTAAATCCGGACAACGCTTGCCACCTACGTATT
>OTU_230
GGACTACTCGGGTTTCTAATCCTGTTTGCTCCCCACGCTTTCGAGCCTCAGCGTCAGTAAAAGCCCAGCAAGCCGCCTTC
GCCACTGGTGTTCCTCCTAATATCTACGCATTTCACCGCTACACTAGGAATTCCGCTTGCCTCTACTTCACTCAAGAATG
TCAGTTTCAAAAGCAGGTTACGAGTTGAGCCCGTAATTTTCACTTCTGACTTGATATCCCGCCTACACTCCCTTTACACC
CAGTAATTCCGGACAACGCTTGCCACCTACGTATT
>OTU_231
GGACTACCCGGGTTTCTAATCCTGTTCGCTCCCCACGCTTTCGCTCCTCAGCGTCAGTAACGGCCCAGAGACCCGCCTTC
GCCACCGGTGTTCTTCCTGATATCTGCGCATTCCACCGCTACACCAGGAGTTCCAGTCTCCCCTACCGCACTCAAGTCAG
CCCGTACCCACCGCACGCCCCCAGTTAAGCCAGAGGATTTCACGGCAGACGCGACCAACCGCCTACAAGCCCTTTACGCC
CAATAATTCCGGACAACGCTCGCGCCCTACGTATT
>OTU_232
GGACTACTAGGGTTTCTAATCCTGTTTGCTCCCCACGCTTTCGCACCTCAGCGTCAATACTTGTCCAGCGAGTCGCCTTC
GCCACTGGTGTTCTTCCGAATATCTACGAATTTCACCTCTACACTCGCAGTTCCACTCACCTCTCCCGGACTCAAGATCT
CCAGTATCAAAGGCAGTTCCGAGGTTGAGCCCCGGGATTTCACCCCTGACTTAAAAATCCGCCTACGTGCGCTTTACGCC
CAGTGATTCCGAACAACGCTAGCCCCCTTCGTATT
>OTU_233
GGACTACCGGGGTTTCTAATCCTGTTTGCTCCCCACGCTTTCGAGCCTCAGCGTCAGTTACAGACCAGAGAGCCGCCTTC
GCCACTGGTGTTCCTCCATATATCTACGCATTTCACCGCTACACATGGAGTTCCACTCTCCTCTTCTGCACTCAAGAAAA
ACAGTTTCCGATGCAGTTCCTCGGTTAAGCCGAGGGCTTTCACATCAGACTTATTCTTCCGCCTGCGCTCGCTTTACGCC
CAATAAATCCGGACAACGCTTGCCACCTACGTATT
>OTU_234
GGACTACCGGGGTTTCTAATCCTGTTTGATACCCACACTTTCGAGCATGAACGTCAGTTACGGATTAGTGTGCTGCCTTC
GCAATCGGAGTTCTTCGTGATATCTAAGCATTTCACCGCTACACCACGAATTCCGCACACCTCAACCGCACTCAAGGACG
CCAGTATCAACTGCAATTTTGAGGTTGAGCCCCAAACTTTCACAGCTGACTTAACGACCCGTCTGCGCTCCCTTTAAACC
CAATAAATCCGGATAACGCTCGCATCCTCCGTATT
>OTU_235
GGACTACACGGGTTTCTAATCCTGTTTGCTCCCCACGCTTTCGTGCCTCAGCGTCAGTTACAGTCCAGAGAGCCGCCTTC
GCTACTGGTGTTCCTCCTAATATCTACGCATTTCACCGCTACACTAGGAATTCCACTCTCCTCTCCTGCACTCAAGTCTT
ACAGTTCCAAAAGCTTACTACGGTTGAGCCGTAGCCTTTCACTTCTGGCTTGAAAGACCGCCTACGCACCCTTTACGCCC
AGTAATTCCGGATAACGCTAGCCCCCTACGTATTA
>OTU_236
GGACTACCGGGGTTTCTAATCCTGTTCGCTCCCCACGCTTTCGCTTCTCAGCGTCAGTAGTGGCCCAGAGACCTGCCTTC
GCCATCGGTGTTCCTCCTGATATCTGCGCATTTCACCGCTACACCAGGAATTCCAGTCTCCCCTACCACACTCTAGTCTG
CCCGTACCCACCGCAAGTCCGAGGTTGAGCCTCGGATTTTCACGGCAGACGCGACAAACCGCCTACAAGCTCTTTACGCC
CAATAATTCCGGACAACGCTCGCACCCTACGTATT
>OTU_237
GGACTACTAGGGTTTCTAATCCTGTTTGCTCCCCACGCTTTCGTGCCTCAACGTCAGGTATGAACCAAGAAGCTGCCTTC
GCCATTGGTGTTCCTCTCGAGATCTACGCATTTTACCGCTACTCCGAGAATTCCACTTCTCTCTTTCATCCTCTAGTCTG
CCAGTTTCTCTCGCTCATCCACGGTTAGGCCGTGGGATTTAACAAAAGACTTAACAAACCGTCTACGCACCCTTTACGCC
CAGTAATTCCGAATAACGCTTGCACCCCTCGTATT
>OTU_238
GGACTACTAGGGTTTCTAATCCTGTTCGCTCCCCACGCTTTCGTCCATCAGCGTCAGTTAAGACATAGTGACCTGCCTTC
GCAATTGGTGTTCTAAGTAATATCTATGCATTTCACCGCTACACTACTTATTCCAGCCACTTCTACCTTACTCAAGACCT
GCAGTATCAATGGCAGTTTCACAGTTAAGCTGTGAGATTTCACCACTGACTTACAGATCCGCCTACGGACCCTTTAAACC
CAATAAATCCGGATAACGCTTGCACCCTCCGTATT
>OTU_239
GGACTACCAGGGTTTCTAATCCTGTTTGCTCCCCACGCTTTCGCGCCTCAGCGTCAGGTGCAGGCCAGAGAGCCGCCTTC
GCCACTGGTGTTCCTCCACATCTCTACGCATTTCACCGCTACACGTGGAATTCCGCTCTCCTCTCCTGCCCTCAAGTCCC
CCAGTTTCCAATGACCCTCCACGGTTGAGCCGTGGGCTTTCACATCAGACTTAAGAGACCGCCTGCGCGCGCTTTACGCC
CAATAATTCCGGACAACGCTCGCCCCCTACGTATT
>OTU_240
GGACTACTAGGGTTTCTAATCCTGTTTGCTCCCCACGCTTTCGAGCCTCAGCGTCAGTAAAAGCCCAGTAAGCCGCCTTC
GCCACCGATGTTCCTCCTAATATCTACGCATTTCACCGCTACACTAGGAATTCCGCTTACCTCTACTTCACTCAAGAACA
GCAGTTTCAAGTGCAGTCTACATGTTGAGCACGTATATTTCACACCTGACTTACCGTCCCGCCTACGCTCCCTTTACACC
CAGTAATTCCGGACAACGCTCGCTCCCTACGTATT
>OTU_241
GGACTACACGGGTTTCTAATCCCAGTTTGGGTCTTAGCTATTGTGTGTTCAGATATGTTAAAGCCACTTTCGTAGTCTAT
TTTGTGTCAACTGGAGTTTTTTACAACTCAGGTGAGTTTTAGCTTTATTGGGGAGGGGGTGATCTAAAACACTCTTTACG
CCGGCTTCTATTGACTTGGGTTAATCGTGTGACCGCGGCTGCTGGCACCTGTCTCTTATACACATCTCCGAGCCCACGAG
ACAAGAGGCAATCTCGTATGCCGTCTTCTGCTTGA
>OTU_242
GGACTACCCGGGTTTCTAATCCTGTTTGCTCCCCACGCTTTCGAGCCTCAACGTCAGTTACCGTCCAGTAAGCCGCCTTC
GCCACTGGTGTTCCTCCTAATATCTACGCATTTCACCGCTACACTAGGAATTCCGCTTACCCCTCCGGCACTCAAGCATA
CCAGTTTCCAATGCAGTCCAGGGGTTAAGCCCCTGCCTTTCACATCAGACTTGATACGCCGTCTACGCTCCCTTTACACC
CAGTAAATCCGGATAACGCTCGCCCCCTACGTATT
>OTU_243
GGACTACTCGGGTTTCTAATCCTGTTTGATCCCCACGCTTTCGTGCTTCAGCGTCAGTTGAGCGCCGGTATGCTGCCTTC
GCAATCGGAGTTCTGCGTGATATCTATGCATTTCACCGCTACACCACGCATTCCGCATACTTCTCGCTCACTCAAGATGG
CCAGTTTCAACGGCCGGAAGAGGTTGAGCCTCTCGATTTTACCGCTGACTTAACCGTCCGCCTACGCACCCTTTAAACCC
AATAAATCCGGATAACGCTCGCATCCTCCGTATTA
>OTU_244
GGACTACAGGGGTTTCTAATCCTGTTTGCTCCCCACGCTTTCGAGCCTCAACGTCAGTGATCGTCCAGTAAGCCGCCTTC
GCCACTGGTGTTCCTCCTAATATCTACGCATTTCACCGCTACACTAGGAATTCCGCTTACCTCTCCGACACTCTAGTTAC
ATAGTTTCCAATGCAGTCCCGGGGTTGAGCCCCGGGCTTTCACATCAGACTTACACAACCGTCTACGCTCCCTTTACACC
CAGTAAATCCGGATAACGCTTGCACCATACGTATT
>OTU_245
GGACTACCGGGGTTTCTAATCCTGTTTGATCCCCACGCTTTCGTGCCTCAGTGTCAATATATGCGTAGCCAGCTGCCTTC
GCAATTGGTGTTCTATGTCATATCTAAGCATTTCACCGCTACATGACATATTCCGCTGACCTCCACAATATTCAAGATTG
ATAGTATCAATAGCAGTTTCCAAGTTAAGCTCGGAGATTTCACCACTGACTTACCAACCCACCTACGCACCCTTTAAACC
CAGTGAATCCGGATAACGCTTGCACCCTCCGTATT
>OTU_246
GGACTACCCGGGTTTCTAATCCCGTTTGCTCCCCCAGCTTTCGCCTTTGAGCGTCAGGAAAAGGCCAGGAAGCTGCCTTC
GCCTTGGGTGTTCCTCCTGATATCTACGAATTTCACCTCTACACCAGGAATTCCACTTCCCTCTCCCCTACTCAAGCATG
ACAGTTTCAAATGCACTTCCTGAGTTAAGCCCAGGGCTTTCACATCTGACTTATCACGCCGCCTACACGCTCTTTACGCC
CAATGATTCCGAACAACGCTTGCACCCCCCGTATT
>OTU_247
GGACTACCGGGGTTTCTAATCCTGTTCGCTACCCACGCTTTCGTGCCTCAGCGTCAATCAAGGCCCAGTTAGCTGCCTTC
GCAATTGGTGTTCCATGACATATCTATGCATTTCACCGCTACATGTCACATTCCGCTAACCTCAACCCAATTCAAGAAAA
TCAGTATCAATGGCAGTTCTATCGTTAAGCGACAGGATTTCACCACTGACTCAATTTCCCGCCTACGCACCCTTTAAACC
CAGTGATTCCGGATAACGCTTGCACCCTCCGTATT
>OTU_248
GGACTACTCGGGTTTCTAATCCTGTTTGCTCCCCATGCTTTCGCACCTCAGCGTCAGGTACAGACCAGAGAGTCGCCTTC
GCCACTGGTGTTCCTCCACATATCTACGCATTTCACCGCTACACGTGGAATTCCACTCTCCTCTTCTGTCCTCAAGTTTC
GCAGTTTCCAATGGCCTTCCACGGTTGAGCCGTGGCCTGTCACATCGGACTGACGAAACCGCCTGCGTGCCCTTTACGCC
CAATAATTCCGGACAACGCTTGCCCCCTACGTATT
>OTU_249
GGACTACTCGGGTTTCTAATCCTGTTTGCTCCCCACGCTTTCGTGCATGAGCGTCAGTGCAGGCCCAGGGGACTGCCTTC
GCCATCGGTGTTCCTCCGCATATCTACGCATTTCACTGCTACACGCGGAATTCCATCCCCCTCTGCCGCACTCCAGCCTT
GCAGTCACAAAGGCCATTCCTAGGTTGAGCCCAGGGATTTCACCTCTGTCTTACAAGACCGCCTGCGCACGCTTTACGCC
CAGTAATTCCGATTAACGCTCGCACCCTACGTATT
>OTU_250
GGACTACTCGGGTTTCTAATCCCAGTTTGGGTCTTAGCTATTGTGTGTTCAGATATGTTAAAGCCACTTTCGTAGTCTAT
TTTGTGTCAACTGGAGTTTTTTACAACTCAGGTGAGTTTTAGCTTTATTGGGGAGGGGGTGATCTAAAACACTCTTTACG
CCGGCTTCTATTGACTTGGGTTAATCGTGTTACCGCGGCGGCTGGCACCTGTCTCTTATACACATCTCCGAGCCCACGAG
ACGGAGCTACATCTCGTATGCCGTCTTCTGCTTGA
>OTU_251
GGACTACTGGGGTTTCTAATCCTGTTTGCTCCCCACGCTTTCGTGCCTCAGCGTCAGTTATGGTCCAGAAAGCCGCCTTC
GCTACTGGTGTTCCTCCGAATCTCTACGCATTTCACCGCTACACTCGGAATTCCACTTTCCTCTCCCACACTCTAGCACA
GCAGTTTCAGAAGCAGCTCTGGGGTTGAGCCCCAAAATTTCACTTCTGACTTACCATGCCGCCTACGCACCCTTTACACC
CAGTAAATCCGGATAACGCTCGCTCCCTACGTATT
>OTU_252
GGACTACTCGGGTTTCTAATCCTGTTTGATACCCGCACCTTCGAGCTTAAGCGTCAGTTGCGCTCCCGTCAGCTGCCTTC
GCAATCGGAGTTCTTCGTCATATCTAAGCATTTCACCGCTACACGACGAATTCCGCCAACGTTGTGCGTACTCAAGGAAA
CCAGTATGCGCTGCAAGTCAGACGTTGAGCGTCTACATTTCACAACACACTTAATATCCAGCCTACGCTCCCTTTAAACC
CAATAAATCCGGATAACGCCTGGACCTTCCGTATT
>OTU_253
GGACTACCCGGGTTTCTAATCCTGTTCGCTACCCACGCTTTCGTCCATCAGCGTCAATATATTAGTAGTAACCTGCCTTC
GCAATTGGTATTCCATGTAATCTCTAAGCATTTCACCGCTACACTACATATTCTAGTTACTTCCTAATAATTCAAGTCAG
ACAGTATCAATGGCCGTTCCACCGTTGAGCGATGGGCTTTCACCACTGACTTATCTGACCGCCTACGGACCCTTTAAACC
CAATGATTCCGGATAACGCTTGGATCCTCCGTATT
>OTU_254
GGACTACTGGGGTTTCTAATCCTGTTTGCTCCCCACGCTTTCGCGCCTCACCGTCAGTTGTCGTCCAGCAATCCGCCTTC
GCCACTGGTGTTCCTCCTAATATCTACGCATTTCACCGCTACACTAGGAATTCCGATTGCCTCTCCGATACTCAAGAAGA
GTAGTTTCAAATGCAGTTCACGAGTTGAGCCCGTGGATTTCACATCTGACTTGCCCTCCCGGCTACACGCCCTTTACACC
CAGTAAATCCGGACAACGCTTGCCACCTACGTATT
>OTU_255
GGACTACACGGGTTTCTAATCCTGTTCGCTCCCCACGCTTTCGAGCCTCAGCGTCAGTTACAGTCCAGAAAGCCGCCTTC
GCCACTGGTGTTCCTCCTAATATCTACGCATTTCACCGCTACACTAGGAATTCCGCTTTCCTCTCCTGCACTCAAGAAAG
ATAGTTTCCATCCCCTCACGGGGTTGAGCCCCGCACTTTTAAGATAGACTTACCTTCCCGCCTGCGCTCCCTTTACGCCC
AATAATTCCGGACAACGCTCGCCACCTACGTATTA
>OTU_256
GGACTACTAGGGTATCTAATCCTGTTCGATACCCACGCTTTCGAGCTTCAGCGTCAGTTGCGCTACAGCAGGCTGCCTTC
GCAATCGGAGTTCTTCGTCATATCTAAGCATTTCACCGCTACACGACGAATTCCGCCTACTTCCTGCGCACTCAAGTCTC
ACAGTTCGCGCTGCAATGCCCAGGTTGAGCCCCGACATTTCACAACACGCTTATAAGACGGCCTACGCTCCCTTTAAACC
CAATAAATCCGGATAACGCCCGGACCTTCCGTATT
>OTU_257
GGACTACTAGGGTTTCTAATCCTGTTTGCTCCCCACGCTTTCGAGCCTCAGCGTCAGTTAATGTCCAGAAAGCCGCCTTC
GCCTCTGGTGTTCCTCCTAATATCTACGCATTCCACCGCTACACTAGGAATTCCGCTTTCCTCTCCATCACTCTAGCTCA
ACAGTTTTAAAAGCAGTTCCGTGGTTAAGCCACGGTATTTCACTCCTAACTTGTTGTGCCGCCTACGCTCCCTTTACGCC
CAGTCATTCCGGACAACGCTCGCCACCTACGTATT
>OTU_258
GGACTACTAGGGTTTCTAATCCTGTTTGCTACCCACGCTTTCGTGCATCAGCGTCAATTCTAGACCAGTAAGCCGCCTTC
GCCACTGGTGTTCCTCCATATATCTAAGCATTTTACCGCTACACATGGAATTCCACTTACCTCTCCTAGATTCAAGCCTC
TCAGTTTCCATCGACCCTTCACAGTTAAGCTGTGGGCTTTCACGACAGACTTAAGTGGCCGCCTACGCACGCTTTACGCC
CAATAATTCCGGATAACGCTTGCCCCCTATGTATT
>OTU_259
GGACTACCGGGGTTTCTAATCCCGTTCGCTACCCACGCTTTCGCGTCTCAGCGTCAGGTGCGGGCCAGGACGTCGCCTTC
GCCACTGGTGTTCCTCCCGATATCTACGCATTCCACCACTACACCGGGAATTCCACGTCCCTCTCCCGACCTCAAGCCCC
GCAGTATCGAACGACCTCTCCCAGTTAAGCCAGGAGCTTTCACGTCCGACTTACGAAACCGCCTGCACGCGCTTTACGCC
CAGTGAATCCGGATAACGCTTGCCACCTACGTATT
>OTU_260
GGACTACCGGGGTTTCTAATCCTGTTTGATACCCACGCTTTCGTGCTTCAGTGTCAGTCATGGCTTGGCAAGCTGCCTTC
GCAATCGGGGTTCTGCGTGATATCTATGCATTTCACCGCTACACCACGCATTCCGCCTGCCTCAATCATACTCAAGCCGG
CCAGTTTCAACGGCAGTCCGATGGTTGAGCCACTGGATTTCACCGCTGACTTAATCGGCGACCTACGCACCCTTTAAACC
CAATAAATCCGGATAACGCTCGCATCCTCCGTATT
>OTU_261
GGACTACCCGGGTTTCTAATCCCATTTGCTCCCCTCGCTTTCGTCTCTCAGTGTCAGTTAAGGCCCAGCAGAGTGCTTTC
GCCTTTGGTGTTCCTCCCGATCTCTACGCATTTCACCGCTCCACCGGGAATTCCCTCTGCCCCTACCGAACTCTAGTCTA
CTAGTTTCTCCTGCCTGCCCAGAGTTAAGCCCTGATCTTTGACAGAAGACTTGATAAACCACCTACAGACGCTTTACGCC
CAATCATTCCGAATAACGCTTGCCCCTCTCGTATT
>OTU_262
GGACTACTCGGGTATCTAATCCTGTTTGCTCCCCACGCTTTCGAGCCTCAGCGTCAGTTATCGTCCAGTAAGCCGCCTTC
GCCACTGGTGTTCCTCCTAATATCTACGCATTTCACCGCTACACTAGGAATTCCGCTTACCCCTCCGACACTCTAGTACG
ACAGTTTCCAATGCAGTACCGGGGTTGAGCCCCGGGCTTTCACATCAGACTTGCCGCACCGCCTGCGCTCCCTTTACACC
CAGTAAATCCGGATAACGCTTGCACCATACGTATT
>OTU_263
GGACTACTCGGGTTTCTAATCCTGTTTGCTCCCCACGCTTTCGAGCCTCAGTGTCAGTTACAGTCCAGTGAGCCGCCTTC
GCCACTGGTGTTCCTCCTAATATCTACGCATTTCACCGCTACACTAGGAATTCCACTCACCCCTCCTGCACTCCAGCCTT
ACAGTTTCAAAAGCAGTTCCGGGGTTGAGCCCCGGATTTTCACTTCTGACTTGCATGGCCACCTACACTCCCTTTACACC
CAGTAAATCCGGATAACGCTTGCTCCATACGTATT
>OTU_264
GGACTACCGGGGTTTCTAATCCTGTTTGCTCCCCACGCTTTCGAGCCTCAGTGTCAGTTAGAGTCCAGCAGGCCGCCTTC
GCCACTGGTGTTCCTCCCGATATCTACGCATTCCACCGCTACACCGGGAATTCCGCCTGCCTCTACTCCACTCAAGAACG
GCAGTATCGAACGCAATCTACGGGTTGAGCCCGTAGTTTTCACATTCGACTTGCTGTCCCACCTGCGCTCCCTTTACACC
CAGTAATTCCGGATAACGCTTGCCACCTACGTTTT
>OTU_265
GGACTACCAGGGTTTCTAATCCTGTTTGCTCCCCACACTTTCGAGCCTCAGCGTCAGTAAAAGCCCAGTTGGCCGCCTTC
GCCACCGGTGTTCCTCCGAATATCTACGCATTTCACCGCTACACTCGGAATTCCGCCAACCTCTACTTCACTCAAGAAAA
ACAGTTTCAACTGCAGTTCATGGGTTAAGCCCATGGATTTCACAGCTGACTTGCTTTCCCGCCTGCGCTCCCTTTACACC
CAGTAATTCCGGACAACGCTTGCCACCTACGTATT
>OTU_266
GGACTACTCGGGTTTCTAATCCTGTTTGCTCCCCACACTTTCGCGTCTCAGCGTCAGTTACAGTCCAGTTAGTCGCCTTC
GCCACTGGTGTTCCTCCCAATCTCTACGCATTTCACCGCTACACTGGGAATTCCACTAACCTCTCCTGCACTCTAGCCAT
CCAGTATCCAAAGCAATTCCCACCTTAAAAGCAGGACTTTCACTCCAGACTTAAATCGCCGCCTACACGCCCTTTACGCC
CAATCATTCCGGACAACGCTTGCCCCCTACGTATT
>OTU_267
GGACTACTCGGGTTTCTAATCCTGTTTGCTCCCCACGCTTTCGTGCATGAGCGTCAGTGTTATCCCAGGGGGCTGCCTTC
GCCATCGGTATTCCTCCACATCTCTACGCATTTCACTGCTACACGTGGAATTCTACCCCCCTCTGACACACTCTAGCCAT
GCAGTCACTAATGCAATTCCCAGGTTGAGCCCGGGGATTTCACATCGGTCTTGCATAACCGCCTGCGCACGCTTTACGCC
CAGTAATTCCGATTAACGCTTGCACCCTACGTATT
>OTU_268
GGACTACTCGGGTTTCTAATCCTGTTTGCTACCCACGCTTTCGCACCTCAGCGTCAGTCATCGGCCAGAAGCCTGCCTTC
GCCATTGGTATTCTTCCAGATATCTACGGATTTCACCCCTACACCTGGAATTCTGGCTCCCTCTCCGTGACTCCAGTCTC
GCAGTTCCCAGCGCAGTCCTACAGTTAAGCTGCAGAATTTCACGCCAGGCTTACAAAACCGCCTACATGCCCTTTACGCC
CAGTAATTCCGAACAACGCTTGCCCCCTACGTGTT
>OTU_269
GGACTACCCGGGTTTCTAATCCTGTTTGCTCCCCACGCTTTCGTGCCTCAGCGTCAGTTATCGTCCAGTAAGTCGCCTTC
GCCACTGATGTTCCTCCTAATATCTACGCATTCCACCGCTACACTAGGAATTCCACTTACCTCTCCGACACTCAAGACTC
GTAGTTTCAGATGCAGCACCCGAGTTAAGCTCTGGGTATTACACATCCAACTTGCGAGCCCGCCTACACACCCTTTACGC
CCAGTCATTCCGGACAACGCTTGCCCCCTACGTAT
>OTU_270
GGACTACTCGGGTTTCTAATCCTGTTTGCTCCCCACGCTTTCGAGCCTCAGTGTCAGTTACAGTCCAGTGAGCCGCCTTC
GCCTCCGGTGTTCCTCCTAATATCTACGCATTTCACCGCTACACTAGGAATTCCGCTCACCCCTCCTGCACTCTAGCATG
ACAGTTCCAAAAGCAATCCCGCGGTTGAGCCCCGGGTTTTCACTTCTGGCTTGCCTTGCCACCTACGCTCCCTTTACACC
CAGTAAATCCGGATAACGCTTGCACCATACGTATT
>OTU_271
GGACTACTAGGGTTTCTAATCCTGTTTGCTCCCCACGCTTTCGAGCCTCAGCGTCAGTTGCAGTCCAGAAAGCCGCCTTC
GCCACCGATGTTCCTCCTAATATCTATGCATTTCACCGCTACACTAGGAATTCCGCCTTCCTCTCCTGTACTCTAGTCCA
ACAGTATTGGATGCACCCCCCAAGTTAAGCCCGGGTATTTCACATCCAACTTATCAGACCGCCTACGCTCCCTTTACGCC
CAGTAATTCCGGACAACGCTCGCCCCCTACGTATT
>OTU_272
GGACTACAAGGGTTTCTAATCCTGTTTGCTCCCCACGCTTTCGTGCATCAGCGTCAGTAATGGTCCAGGAAACTGTCTAC
ACCGCAGGTGTTCCTCCTGATATCTACGCATTTCACCGCTACACCAGGAATTCCGCTTCCCTCTCCCATACTCTAGCCAG
GCAGTTTTCGGCGCACCCTCCCAGTTAAGCCGGGAGATTTCACACCAAACTTGCCCAACCGCCTACGCACCCTTTACGCC
CAGTAATTCCGAACAACGCTTGCTGCCTACGTATT
>OTU_273
GGACTACTGGGGTTTCTAATCCTGTTTGCTCCCCACGCTTTCGTGCCTCAGTGTCAATGACCGTGTAGCAAGCTGCCTTC
GCAATTGGTGTTCTATGTCATATCTAAGCATTTCACCGCTACATGACATATTCCGCTTACCTCCACGATATTCAAGACTA
ATAGTATCAACGGCAGTTCCCAAGTTAAGCTCGGGGATTTCACCACTGACTTACTAGCCCACCTACGCACCCTTTAAACC
CAGTGAATCCGGATAACGCTTGCACCCTCCGTATT
>OTU_274
GGACTACTCGGGTTTCTAATCCTGTTTGCTCCCCACGCTTTCGCGCCTCAGCGTCAGTTGCTGTCCAGTTGACCGCCTTC
GCCACTGGTGTTCCTCCTAATATCTACGCATTTCACCGCTACACTAGGAATTCCGTCAACCTCTCCAGTACTCAAGAACT
ACAGTTTCAAACGCAGGCCAGAGGTTGAGCCCCTGGTTTTCACGCCTGACTTGCAATCCCGCCTACACGCCCTTTACACC
CAGTAAATCCGGACAACGCTTGCCACCTACGTATT
>OTU_275
GGACTACTCGGGTTTCTAATCCTGTTTGCTCCCCACGCTTTCGCGCCTCACCGTCAGTTGTCGTCCAGTAACCCGCCTTC
GCCACTGGTGTTCTTCCTAATATCTACGCATTTCACCGCTACACTAGGAATTCCGGTTACCTCTCCGATACTCAAGGGAA
ACAGTTTCAAATGCAGTTCACGAGTTGAGCCCGCGGATTTCACATCTGACTTGTCTCTCCGGCTACACGCCCTTTACACC
CAGTAAATCCGGACAACGCTTGCCACCTACGTATT
>OTU_276
GGACTACTCGGGTTTCTAATCCTGTTTGCTCCCCACGCTTTCGAGCCTGAACGTCAGTTACTGTCCAGCAAGCCGCCTTC
GCCACTGGTGTTCTTCCTAATATCTACGCATTTCACCGCTACACTAGGAATTCCGCTTGCCTCTCCAGCACTCTAGCTCT
ACAGTTTCCAAAGCAGTCCCGGGGTTGAGCCCCGGGCTTTCACTTCAGACTTGCAGTGCCGTCTGCGCTCCCTTTACACC
CAGTAAATCCGGATAACGCTTGCCCCCTACGTATT
>OTU_277
GGACTACTAGGGTTTCTAATCCTGTTTGCTCCCCACGCTTTCGAGCCTCAGCGTCAGTTATCGTCCAGTAAGCCGCCTTC
GCCACTGGTGTTCCTCCTAATATCTACGCATTTCACCGCTACACTAGGAATTCCACTTACCTCTCCGATACTCAAGTACG
ACAGTTTCCAATGCAGTCCCGGGGTTGAGCCCCGGGCTTTCACATCAGACTTGCCGCACCGCCTGCGCTCCCTTTACACC
CAGTAAATCCGGATAACGCTTGCCCCCTACGTATT
>OTU_278
GGACTACTAGGGTTTCTAATCCTGTTCGCTCCCCACGCTTTCGCTCCTCAGCGTCAGTTACGGCCCAGAGAACTGCCTTC
GCCATCGGTGTTCCTCCTGATATCTGCGCATTCCACCGCTACACCAGGAATTCCATTCTCCCCTACCGCACTCTAGTCTG
CCCGTACCCACTGCAAGCCCGAGGTTGAGCCTCGGGATTTCACAGCAGACGCGACAGACCGCCTACGAGCTCTTTACGCC
CAATAATTCCGGACAACGCTTGCGCCCTACGTATT
>OTU_279
GGACTACTAGGGTTTCTAATCCTGTTTGCTCCCCACGCTTTCGAGCCTCAGTGTCAGTTACAGTCCAGCAAGCCGCCTTC
GCCACTGGTGTTCCTCCTAATATCTACGCATTTCACCGCTACACTAGGAATTCCACTTGCCTCTCCTGCACTCCAGCTCC
ACAGTTTCAAAAGCAGTCCCGGGGTTGAGCCCCGGGCTTTCACTTCTGACTTGTGATGCCACCTACACTCCCTTTACACC
CAGTAAATCCGGATAACGCTTGCTCCATACGTATT
>OTU_280
GGACTACTCGGGTTTCTAATCCTATTTGCTCCCCACGCTTTCGGGAATGAGCGTCAGTTGCGGCCCAGACCGTCGCCTTC
GCCACTGGTGTTCCTCCATATATCTACGCATTTCACCGCTACACATGGAATTCCACGATCCTCTTCCGCACTCTAGCCGC
CCGGTTTCCATGGCTTACCGAAGTTTAGCTTCGGTCTTTCACCACAGACCCTTGCGGCCGCCTGCTCCCTCTTTACGCCC
AATGATTCCGGATAACGCTCGCCACCTACGTATTA
>OTU_281
GGACTACTAGGGTTTCTAATCCTGTTTGCTACCCACGCCTTCGCACCTCAGCGTCAGTATTGGTCCAGGAAGTCGCCTTC
GCCACCGGTGTTCCTCCTGATATCTACGAATTTCACCTCTACACCAGGAATTCCACTTCCCTCTCCCATACTCAAGCCTG
GCAGTATCAAATGCACTTCCGGGGTTAAGCCCCGGGCTTTCACATCTGACTTACCAGGCCGCCTACGTGCTCTTTACGCC
CAATGATTCCGAATAACGCTTGCACCCCCCGTATT
>OTU_282
GGACTACAGGGGTTTCTAATCCTGTTTGCTCCCCACGCTTTCGAGCCTCAACGTCAGTTACCGTCCAGTAAGCCGCCTTC
GCCACTGGTGTTCCTCCTAATATCTACGCATTTCACCGCTACACTAGGAATTCCGCTTACCCCTCCGGCACTCAAGCTTA
ACAGTTTCCAATGCAGTCCCGGGGTTAAGCCCCAGCCTTTCACATCAGACTTGTTATGCCGTCTACGCTCCCTTTACACC
CAGTAAATCCGGATAACGCTTGCCCCCTACGTATT
>OTU_283
GGACTACTCGGGTTTCTAATCCCGTTTGCTCCCCTGGCTTTCGTGCCTCAGCGTCAGATATGCCCCAGTGTATCGCCTTC
GCCTCCGGTGTTCCATCTAATATCAACACATTTCACCGCTCCACTAGATGTTCCATACACCTCTAGCATCCTCCAGCTCG
CCAGTTCAGAGCGCAGTTCCTCGGTTGAGCCGAGGGATTTCACACCCTGCTTAACAAGCCGCCTACGCACCCTGTAAGCC
CAGTGATTCCGAGTAACGTTCGCACAGTTCGTATT
>OTU_284
GGACTACCCGGGTTTCTAATCCTGTTTGATACCCACACTTTCGAGCCTCAGTGTCAGTAACAGTCCAGTGAGCTGCCTTC
GCAATCGGAGTTCTTCGTGATATCTAAGCATTTCACCGCTACACCACGAATTCCGCCCACCTCTACTGTACTCAAGACAC
ACAGTATCAACTGCAATTTTACGGTTGAGCCGCAAACTTTCACAACTGACTTACATGTCCACCTACGCTCCCTTTAAACC
CAATAAATCCGGATAACGCTCGGATCCTCCGTATT
>OTU_285
GGACTACTGGGGTTTCTAATCCTATTTGCTCCCCACGCTTTCGTGCCTCAGTGTCAGTTACAGACCAGGCGACCGCCTTC
GCCACTGGTGTTCCTCCATATATCTACGCATTTTACCGCTACACATGGAATTCCATCGCCCTCTTCTGCACTCCAGCATA
CCAGTTTCCATAGCTTACAATGGTTGAGCCATTGCCTTTTACTACAGACTTAGTACGCCACCTACGCACCCTTTACGCCC
AATGATTCCGGATAACGCTTGCCACCTACGTATTA
>OTU_286
GGACTACTCGGGTTTCTAATCCTGTTTGATCCCCGCACTTTCGTGCATCAGCGTCAATCGCGGTTTCGTGAGATGCCTTC
GCAATCGGTGTTCTGTGTAATATCTATGCATTTCACCGCTACACTACACATTCCTCCCACGGCAACCGTATTCCAGTGAG
GCAGTATCAACGGCACGGCACGGGTTGAGCCCGTGAATTTCACCGCTGACTTACTTCACCGCCTACGCACCCTTTAAACC
CAATGAATCCGGATAACGCTTGCATCCTCCGTATT
>OTU_287
GGACTACCGGGGTTTCTAATCCTGTTTGCTCCCCACGCTTTCGTGCCTCAGTGTCAGTGCTGGTCCAGATAGTCGCCTTC
GCCACTGGTGTTCCTCCCGATCTCTACGCATTTCACTGCTACACCGGGAATTCCACTATCCTCTACCGCACTCTAGTGAT
CCAGTATCAAATGCAGTTCCCAGGTTGAGCCCAGGGCTTTCACATCTGACTTAAACCACCACCTACGCACGCTTTACGCC
CAGTAATTCCGAGTAACGCTTGCACCCTTCGTATT
>OTU_288
GGACTACTCGGGTTTCTAATCCCGTTTGCTACCTTAGCTTTCGTGTCTGAGCGTCAGAAATGGGCCAGGAGACCGCTTTC
GCCACTGGTGTTCCTCCGCATATCTACGCATTTCACCACTACACGCGGAATTCCATCTCCCTCTACCACTCTCTAGTCTG
ATAGTTTTGAACGACCTCTCCCGGTTAAGCCAGGAGCTTTCACATCCAACTTATCAAACCGCCTGCACACGCTTTACGCC
CAGTAAATCCGGATAACGCTCGCCTCCTACGTTTT
>OTU_289
GGACTACCGGGGTTTCTAATCCTGTTTGCTCCCCACGCTTTCGCGCCTCAGCGTCAGTTGCTGTCCAGCAGACCGCCTTC
GCCACTGGTGTTCCTCCTAATATCTACGCATTTCACCGCTACACTAGGAATTCCGTCTGCCTCTCCAGTACTCAAGAACC
ACAGTTTCAAATGCAGGCTGGAGGTTGAGCCTCCAGTTTTCACATCTGACTTGCGATCCCGCCTACACGCCCTTTACACC
CAGTAAATCCGGATAACGCTTGCCACCTACGTATT
>OTU_290
GGACTACTAGGGTTTCTAATCCTGTTCGCTACCCATGCTTTCGAGCCTCAGCGTCAGTTGCAGACCAGAGAGCCGCCTTC
GCCACTGGTGTTCTTCCATATATCTACGCATTCCACCGCTACACATGGAGTTCCACTCTCCTCTTCTGCACTCAAGTTCA
ACAGTTTCTGATGCAATTCTCCGGTTGAGCCGAAGGCTTTCACATCAGACTTATTGAACCGCCTGCACTCGCTTTACGCC
CAATAAATCCGTACAACGCTTGCCACCTACGTATT
>OTU_291
GGACTACCGGGGTTTCTAATCCTGTTCGCTCCCCATGCTTTCGCTCCTCAGCGTCAGTCACGGCCCAGTAACCTGCCTTC
GCCATCGGTGTTCCTCCTGATATCTGCGCATTCCACCGCTACACCAGGAATTCCAGTTACCCCTACCGCACTCTAGCCTG
CCCGTACCCACTGCAATCCCGGAGTTAAGCCCCGGACTTTCACAGCAGACGCAACAAACCGCCTACGAGCTCTTTACGCC
CAATAAATCCGGATAACGCTCGCATCCTACGTATT
>OTU_292
GGACTACTCGGGTTTCTAATCCTATTTGCTCCCCACGCTTTCGGGACTGAGCGTCAGTTGCAGGCCAGATCGTCGCCTTC
GCCACTGGTGTTCCTCCATATATCTACGCATTTCACCGCTACACATGGAATTCCACGATCCTCTCCTGCACTCTAGCTGC
CTGGTTTCTATGGCTTACTGAAGTTAAGCTTCAGGCTTTCACCACAGACCCTTGCTGCCGCCTGCTCCCTCTTTACGCCC
AATAATTCCGGATAACGCTTGCCACCTACGTATTA
>OTU_293
GGACTACTGGGGTTTCTAATCCTGTTTGCTCCCCTAGCTTTCGCACCTCAGCGTCAGTTATGGCCCAGAAAGCTGCCTTC
GCCATCGGTGTTCTTCCCAATATCTGCGCATTTCACCGCTACACTGGGAATTCCACTTTCCTCTACCAAACTCGAGCCTG
CCAGTTCAAAATCCAACTGAAGGTTGAGCCCCCAGGTTTAAGATCTTGCTTAACAAGCCGCCTACGCGCGCTTTACGCCC
AATAAATCCGGATAACGCTTGCTCCCTACGTATTA
>OTU_294
GGACTACCGGGGTTTCTAATCCTGTTCGCTCCCCATGCTTTCGCTTCTCAGCGTCAGTTACAGCCCAGAGACCTGCCTTC
GCCATCGGTGTTCTTCCTGATATCTGCGCATTCCACCGCTACACCAGGAGTTCCAGTCTCCCCTACTGCACTCTAGTCTG
CCCGTACCCACTGCAATACACGGGGTTAAGCCCCGGCCTTTCACAGCAGACGCGACAAACCGCCTACAAGCTCTTTACGC
CCAATAATTCCGGACAACGCTCGCGCCCTACGTAT
>OTU_295
GGACTACTAGGGTTTCTAATCCTGTTTGCTCCCCACGCTTTCGCGCCTCAGCGTCAGTTAGTGTCCAGCAAATCGCCTTC
GCCACTGGTGTTCTTCCTAATATCTACGCATTTCACCGCTACACTAGGAATTCCATTTGCCTCTCCACCACTCAAGAACT
ACAGTTTCAAATGCAGGCTATGGGTTAAGCCCATAGTTTTCACATCTGACTTGCAGTCCCGCCTACACGCCCTTTACACC
CAGTAAATCCGGATAACGCTTGCTCCCTACGTATT
>OTU_296
GGACTACTAGGGTATCTAATCCCTTTCGCTCCCCTAGCTTTCGTCCCTCAGTGTCAGTGCAGACCCAGTTAGACGCTTTC
GCCGCTGGTGTTCTTCCCGATATCTACGCATTTCACCGCTACACCGGGAATTCCTCTAACCCCTATCGCACTCTAGCTCC
TCAGTTTCCATGACCCTTATGCGGTTAAGCCGCACGCTTTGACCACAGACTTGATTAGCCACCTACGGACGCTTTACGCC
CAATAATTCCGGATAACGCTTGCATCCTCCGTATT
>OTU_297
GGACTACCGGGGTTTCTAATCCTGTTTGCTCCCCACGCTTTCGCACCTCAGCGTCAATACCGGTCCAGGTGGCCGCCTTC
GCCACTGATGTTCCTCCAGATATCTACGGATTTCACTCCTACACCTGGAATTCCGCCACCCTCTCCCGGATTCGAGTCGT
GCAGTATCAAGGGCAGTTCCACGGTTGAGCCGTGGGCTTTCACCCCTGACTTACATAACAGCCTACGTGCGCTTTACGCC
CAGTGATTCCGATTAACGCTTGCACCCTCCGTATT
>OTU_298
GGACTACCGGGGTTTCTAATCCTGTTTGCTCCCCACGCTTTCGTGCATGAGCGTCAGTGTTGACCCAGGGGGCTGCCTTC
GCCATCGGTGTTCCTCCACATCTCTACGCATTTCACTGCTACACGTGGAATTCCACCCCCCTCTGCCACACTCAAGCGAC
CTAGTTTCAAGCGCAATTCCCAGGTTAAGCCCGGGGATTTCACACCTGACTTGTGCCGCCGCCTGCGCACGCTTTACGCC
CAGTAATTCCGATTAACGCTCGCACCCTACGTATT
>OTU_299
GGACTACCGGGGTTTCTAATCCTGTTTGCTCCCCATGCTTTCGTGCCTCAGCGTCAGTTAAAGCCCAGCAGGCCGCCTTC
GCCACTGGTGTTCCTCCTAATATCTACGCATTTCACCGCTACACTAGGAATTCCGCCTGCCTCTACTTCACTCAAGAACG
ACAGTTTCAAATGCAGCCCCGGAGTTAAGCCCCGGTATTTCACATCTGACTTGCCATCCCGCCTACGCACCCTTTACACC
CAGTAAATCCGGACAACGCTCGCTCCCTACGTATT
>OTU_300
GGACTACACGGGTTTCTAATCCTGTTTGCTACCCACGCTTTCGAGCATGAACGTCAGTGTTATCCCAGGAGGCTGCCTTC
GCCATCGGTATTCCTCCACATCTCTACGCATTTCACTGCTACACGTGGAATTCTACCTCCCTCTGACACACTCTAGTCAC
CCAGTTCAGAACGCAGTTCCCAGGTTGAGCCCGGGGATTTCACATCCTGCTTAAGTAACCGTCTGCGCTCGCTTTACGCC
CAGTAATTCCGATTAACGCTCGCACCCTACGTATT
>OTU_301
GGACTACTCGGGTTTCTAATCCTGTTTGCTCCCCACGCTTTCGCGCCTCAGCGTCAGTTAATGTCCAGCAGGCCGCCTTC
GCCACTGGTGTTCCTCCGTATATCTACGCATTTCACCGCTACACACGGAATTCCGCCTGCCTCTCCATCACTCAAGAAAA
ACAGTTTCAAATGCAGGCCAGTGGTTGAGCCACTGGTTTTCACATCTGACTTGCTTCCCCGCCTACACGCCCTTTACACC
CAGTAAATCCGGATAACGCTCGCTCCCTACGTATT
>OTU_302
GGACTACTGGGGTTTCTAATCCTGTTCGCTACCCACGCTCTCGCGCATCAGCGTCAGATCGAGCCTGGGAAGCTGCCTTC
GCTATCGGGGTTCCAAGTGATATCTATGCATTTCACCGCTACTTCACTTGTTCCGCCTCCCTCGTCTCGTCTCGAGGGCG
CCAGTTTCAACGGCGTGCTACAGTTTAGCTGCAGTCTTTTACCGCTGACTTGACGTCCCGCCTACGCGCCCTTTAAACCC
AATAAATCCGGATAACGCTCGCATCCCCCGTATTA
>OTU_303
GGACTACTGGGGTTTCTAATCCTGTTTGCTCCCCACGCTTTCGAGCCTCAGCGTCATTTACAGTCCAGTAAGCCGCCTTC
GCCACTGGTGTTCCTCCTAATATCTACGCATTTCACCGCTACACTAGGAATTCCACTTACCTCTCCTGCAATCTAGTCCG
GCAGTTTCAAAAGCAGTCCCGAGGTTGAGCCCCGGGCTTTCACTTCTGACTTGTCAGACCGCCTACGCTCCCTTTACACC
CAGTAAATCCGGATAACGCTTGCCCCCTACGTATT
>OTU_304
GGACTACTGGGGTTTCTAATCCTGTTTGCTCCCCACGCTTTCGCACCTGAGCGTCAGTCTTTGTCCAGGGGGCCGCCTTC
GCCACCGGTATTCCTCCACATCTCTACGCATTTCACCGCTACACGTGGAATTCTACCCCCCTCTACAAGACTCTAGCCAA
CCAGTTTCAGATGCAATTCCCAAGTTAAGCTCGGGGCTTTCACATCTGACTTAATTGACCGCCTGCGTGCGCTTTACGCC
CAGTAATTCCGATTAACGCTTGCACCCTCCGTATT
>OTU_305
GGACTACCAGGGTTTCTAATCCTGTTTGCTCCCCACGCTTTCGAGCCTCAGCGTCAGTAGTCGTCCAGTAAGCCGCCTTC
GCCACTGGTGTTCCTCCTAATATCTACGCATTTCACCGCTACACTAGGAATTCCACTTACCCCTCCGACACTCTAGTCCT
ACAGTTTCCAATGCAGTCCCGGGGTTGAGCCCCGGCCTTTCACATCAGACTTGCAGGACCGCCTACGCTCCCTTTACACC
CAGTAAATCCGGATAACGCTTGCTCCATACGTATT
>OTU_306
GGACTACTCGGGTTTCTAATCCTGTTTGCTACCCATGCTTTCGTGCCTCAGTGTCAGTTGCAGTCCAGAAAGCCGCCTTC
GCTACTGGTGTTCCTCCCAATATCTACGCATTTCACCGCTACATTGGGAATTCCACTTTCCTCTCCTGCACTCAAGTCCT
CCAGTTTCGGCGGCTTACTACGGTTGAGCCGTAGCCTTTAACCACCGACTTGAAGGACCACCTACGCACCCTTTACGCCC
AGTAAATCCGGATAACGCTAGCCCCCTACGTATTA
>OTU_307
GGACTACTCGGGTTTCTAATCCTGTTTGCTCCCCACGCTTTCACGCATTAGCGTCAGTTAAGTTCCAGCAGATCGCCTTC
GCAATAGGTATTCTTCTTGATATCTACGGATTTTACCCCTACACCAAGAATTCCATCTGCCTCTCCCTTACTCTAGATTA
TCAGTTTCCCAAGCAGTTTAACGGTTAAGCCGTTAGATTTCACAAGAGACTTGATAATCCGCCTACGCGTCCTTTACGCC
CAGTGATTCCGAGTAACGCTTGCACCCTCCGTATT
>OTU_308
GGACTACTCGGGTTTCTAATCCCGTTCGCTCCCCTGGCTTTCGAGCCTCAGCGTCAGTTACAGTCCAGAAAGCCGCCTTC
GCCACTGGTGTTCCTCCTAATATCTACGCATTTCACCGCTACACTAGGAATTCCGCTTTCCTCTCCTGCACTCAAGAAGA
ACAGTTTCTATCCCCTCACGGGGTTGAGCCCCGCACTTTTAAGATAGACTTGCTCTCCCGCCTGCGCTCCCTTTACGCCC
AATAATTCCGGACAACGCTCGCCACCTACGTATTA
>OTU_309
GGACTACCGGGGTTTCTAATCCTGTTTGCTACCCACGCTTTCGAGCCTCAGCGTCAGTTAAAGCCCAGCAGGCCGCCTTC
GCCACTGGTGTTCCTCCTAATATCTACGCATTTCACCGCTACACTAGGAATTCCGCCTGCCTCTACTTCACTCAAGAAAA
ACAGTTTTGAAAGCAGCTCATGGGTTAAGCCCATGCATTTCACTTCCAACTTGCTTTCCCGCCTACGCTCCCTTTACACC
CAGTAATTCCGGACAACGCTCGCTCCCTACGTATT
>OTU_310
GGACTACTGGGGTTTCTAATCCCGTTCGCTCCCCTGGCTTTCGCATCTCAGCGTCAGACACAGTCCAGAAAGGCGCCTTC
GCCACTGGTGTTCCTCCCAATATCTACGCATTTCACCGCTACACTGGGAATTCCCCTTTCCTCTCCTGCACTCAAGCCTA
CCAGTATCGGGCGCCATACGGGGTTGAGCCCCGCATTTTCACGCCCGACTTAATAGGCCGCCTACATGCTCTTTACGCCC
AATAATTCCGGACAACGCTTGCCACCTACGTATTA
>OTU_311
GGACTACCGGGGTTTCTAATCCTGTTTGCTCCCCACGCTTTCGAGCCTCAACGTCAGTTACTGTCCAGCAAGCCGCCTTC
GCCACTGGTGTTCCTCCTAATATCTACGCATTTCACCGCTACACTAGGAATTCCGCTTGCCTCTCCAGCACTCTAGCCCA
ACAGTTTCCAAAGCAGTTCCCGGGTTGAGCCCGGGGATTTCACTTCAGACTTGCTGTGCCGTCTACGCTCCCTTTACACC
CAGTAAATCCGGATAACGCTTGCCCCCTACGTATT
>OTU_312
GGACTACTCGGGTTTCTAATCCTGTTTGCTCCCCACGCTTTCGTGCCTCAACGTCAGATATAGTTTGGTAAGCTGCCTTC
GCAATCGGTGTTCTGTATGATCTCTACGCATTTCACCGCTACACCATACATTCCGCCTACCGCAACTACTCTCTAGCTCA
ACAGTATTAGAGGCAGTCTCGGAGTTAAGCCCCGAGCTTTCACCTCTAACTTATCAAACCGCCTACGCACCCTTTAAACC
CAATAAATCCGGATAACGCTTGGATCCTCCGTATT
>OTU_313
GGACTACTAGGGTTTCTAATCCTGTTTGATACCCACACTTTCGAGCCTCAACGTCAGTTACAGCTTAGCAGGCTGCCTTC
GCAATCGGGGTTCTTCGTGATATCTATGCATTTCACCGCTACACCACGAATTCCGCCTGCCTCAACTGCACTCAAGGGAA
CCAGTATCAACTGCAATTTTACGGTTGAGCCGCAAACTTTCACAACTGACTTAATCCCCCGTCTGCGCTCCCTTTAAACC
CAATAAATCCGGATAACGCTCGCATCCTCCGTATT
>OTU_314
GGACTACCCGGGTTTCTAATCCCGTTTGCTCCCCTGGCTTTCGCTCCTCAGCGTCAGTGTTGGTCCAGGATGCCGCCTTC
GCCACCGGTGTTCCTCCAGATATCTACGCATTTCACCGCTACACCTGGAATTCCGCATCCCTCTCCCAATCTCAAGCCAT
CCAGTATCAGACGCAGTTCCCCGGTTAAGCCGAGGGATTTCACGTCTGACTTAGTTGGCCGCCTACGAGCCCTTTACGCC
CAGTAATTCCGAACAACGCTTGCCCCCCCCGTATT
>OTU_315
GGACTACACGGGTTTCTAATCCTGTTTGCTCCCCACGCTTTCGCGCCTCAGCGTCAGTTACTGTCCAGCAATCCGCCTTC
GCCACTGGTGTTCCTCCGTATATCTACGCATTTCACCGCTACACACGGAATTCCGATTGCCTCTCCAGCACTCAAGAACT
ACAGTTTCAAATGCAGGCTGGAGGTTGAGCCCCCAGTTTTCACATCTGACTTGCAATCCCGCCTACACGCCCTTTACACC
CAGTAAATCCGGATAACGCTTGCCACCTACGTATT
>OTU_316
GGACTACAAGGGTTTCTAATCCTGTTTGCTCCCCACGCTTTCGTGCATGAGCGTCAGTCATGTCCCAGAGGGCTGCCTTC
GCCATCGGTGTTCTTCCACATATCTACGCATTTCACTGCTACACGTGGAATTCCACCCTCCTCTGACAAACTCAAGTCCT
GCAGTCATATATGCAATTCCCAGGTTGAGCCCGGGGATTTCACATCTATCTTACAGAACCGCCTGCGCACGCTTTACGCC
CAGTAATTCCGATTAACGCTTGCACCCTACGTATT
>OTU_317
GGACTACCAGGGTTTCTAATCCTGTTTGATCCCCACGCCTTCGTGCATGAGCGTCAGTTATGGTTTAGTAAGCTGCCTGC
GCAATCGGTGTTCTTTGTGATATCTATGCATTTCACCGCTACACCACAAATTCCGCCTACTTCATCCACACTCAAGCTTG
CCAGTTTCGAAGGCTCTTTTACAGTTGAGCTGCAAAATTTCACCGCCGACTTAACATGCCGCCTGCGCACCCTTTAAACC
CAATAAATCCGGATAACGCTCGGATCCTCCGTATT
>OTU_318
GGACTACAGGGGTTTCTAATCCTGTTCGCTCCCCATGCTTTCGCTCCTCAGCGTCAGTAACTGCCCAGTAACCTGCCTTC
GCCATCGGTGTTCCTCCTGATATCTGCGCATTTCACCGCTACACCAGGAATTCCAGTTACCCCTACAGCACTCTAGTCGT
GCCCGTATCGCCTGCACGCCCGGAGTTAAGCCCCGGAATTTCACAGACGACGCGACACACCACCTACGAGCTCTTTACGC
CCAGTAAATCCGGACAACGCTTGCACCCTACGTAT
>OTU_319
GGACTACCGGGGTTTCTAATCCCGTTTGCTACCCTAGCTTTCGCGTCTGAGTGTCAGGAATGGTCCAGGAGGCCGCCTTC
GCCACTGGTGTTCCTCCAGATATCTGCGCATTCCACCGCTACACCTGGAATTCCACCTCCCTCTACCATCCTCTAGCTCT
GCAGTTTAGAACGGCATCTCCCAGTTGAGCCGGGAGCTTTCACGCCCTACTTACAGAACCACCTACACGCGCTTTACGCC
CAGTAAATCCGGATAACGTTTGCCTCCTACGTGTT
>OTU_320
GGACTACTCGGGTTTCTAATCCTGTTTGCTACCCATGCTTTCGAGCCTCAGCGTCAGTTAGTGCCCAGTAGGCCGCCTTC
GCCACTGGTGTTCCTCCCGATATCTACGCATTCCACCGCTACACCGGGAATTCCGCCTACCTCTACACCACTCAAGAATC
GCAGTTTTGAAAGCAGGTCATGGGTTGAGCCCATGAATTTCACTCCCAACTTACGATCCCGCCTGCGCTCCCTTTACACC
CAGTAATTCCGGACAACGCTTGCCACCTACGTTTT
>OTU_321
GGACTACTAGGGTTTCTAATCCCATTTGCTACCCCGGCTTTCGTTCCTCAGTGTCAATTACGGCCCAGTAAAGCGCTTAC
GCCACCGATGTTCCTCCTGATATCTACGCATTTCACCGCTACACCAGGAATTCCCTTTACCTCTACCGCATTCTAGTTCG
CCAGTATCCAGTGCTCTACTGAAGTTGAGCTTCAGAATTTAACACCAGACTTAACTTACCACCTACGAACTCTTTACGCC
CAATGATTCCGGACAACGCTTGCACCCCCCGTATT
>OTU_322
GGACTACTCGGGTATCTAATCCTGTTTGCTCCCCACACTTTCGTGCCTCAGTGTCAGTAACAGTCCAGAAAGCCGCCTTC
GCCACTGGTGTTCCTCCTAATATCTACGCATTTCACCGCTACACTAGGAATTCCGCTTTCCTCTCCTGCACTCAAGGTAC
CCAGTTCAGGGGGCTGACATTGGTTAAGCCAGTGCCTTTCACCCCCTGCTTAAGTAACCACCTACGCACTCTTTACGCCC
AATAATTCCGGATAACGCTTGCCCCCTACGTATTA
>OTU_323
GGACTACTCGGGTTTCTAATCCTGTTTGCTACCCACGCTTTCGCACCTCAGCGTCAGTTACCGTCCAGGTGGCCGCCTTC
GCCACCGGTGTTCCTCCAGATATCTACGGATTTCACTCCTACACCTGGAATTCCGCCACCCTCTCCGGTACTCAAGCCTG
GCAGTATCAAAGGCAGTTCCACAGTTGGGCTGTGGGATTTCACCCCTGACTTACCAAGCCGCCTACGTGCGCTTTACGCC
CAGTGATTCCGATTAACGCTTGCACCCTCCGTATT
>OTU_324
GGACTACCGGGGTTTCTAATCCTGTTTGCTCCCCACGCTTTCGCGCCTGAGCGTCAGTATCGGGCCAGAAAGTCGCCTTC
GCCACCGGTGTTCCTCCTGATATCTACGAATTTCACCTCTACACCAGGAATTCCACTTTCCTCTCCCGTACTCTAGCGAG
GCAGTATCAAATGCACTTCCTGGGTTAAGCCCAGGGCTTTCACATCTGACTCACCAAGCCGCCTGCGCGCTCTTTACGCC
CAATGATTCCGAACAACGCTCGCACCCCCCGTATT
>OTU_325
GGACTACTCGGGTATCTAATCCTGTTTGATCCCCACGCTTTCGCACCTCAGCGTCAGTTACAGACCAGAGAGCCGCCTTC
GCCACTGGTGTTCCTCCATATCTCTGCGCATTTCACCGCTACACATGGAATTCCACTCTCCTCTTCTGTACTCAAGTAAA
ACAGTTTCCAATGACCCTCCCCGGTTGAGCCGGGGGCTTTCACATCAGACTTATTTTACCGCCTACGCGCGCTTTACGCC
CAATAATTCCGGATAACGCTTGCCACCTACGTATT
>OTU_326
GGACTACAGGGGTTTCTAATCCTGTTTGATCCCCACGCTTTCGTGCCTCAGCGTCAATGACTGTGTAGCAAGCTGCCTTC
GCAATAGGTGTTCTATGTCATATCTAAGCATTTCACCGCTACATGACATATTCCGCTTACCTCCACAGTATTCAAGACAG
ATAGTATCAACGGCAGTTCCCAAGTTAAGCTCGGGGATTTCACCACTGACTTACCTGCCCGCCTACGCACCCTTTAAACC
CAGTGAATCCGGATAACGCTTGCACCCTCCGTATT
>OTU_327
GGACTACTGGGGTTTCTAATCCTGTTTGCTCCCCACGCTTTCGCGCCTCACCGTCAGTTGCTGTCCAGCAGACCGCCTTC
GCCACTGGTGTTCCTCCTAATATCTACGCATTTCACCGCTACACTAGGAATTCCGTCTGCCTCTCCAGTACTCAAGACCC
GCAGTTTCAAATGCAGTTCGTGGGTTAAGCCCACGGATTTCACATCTGACTTACAGGCCCGGCTGCACGCCCTTTACACC
CAGTAAATCCGGACAACGCTTGCTCCCTACGTATT
>OTU_328
GGACTACTGGGGTTTCTAATCCTGTTTGCTCCCCACGCTTTCGCGCCTCAGCGTCAGTTACAGTCCAGAAAGTCGCCTTC
GCCACTGGTGTTCCTCCTAATATCTACGCATTTCACCGCTACACTAGGAATTCCACTTTCCTCTCCTGTCCTCAAGATGC
CCAGTTTCCGATGCACTCTCAGGGTTGAGCCCTGATCTTTCACACCGGACTTAAACATCCGCCTACGCGCCCTTTACGCC
CAATAATTCCGGACAACGCTTGCCCCCTACGTATT
>OTU_329
GGACTACTGGGGTATCTAATCCTGTTTGCTCCCCACGCTTTCGAGCCTCAGCGTCAGTTACAGACCAGAGAGCCGCTTTC
GCCACCGGTGTTCCTCCATATATCTACGCATTTCACCGCTACACATGGAATTCCACTCTCCCCTTCTGCACTCAAGTCTA
ACAGTTTCCAAAGCGAACAATGGTTAAGCCACTGCCTTTAACTTCAGACTTATTAAACCGCCTGCGCTCGCTTTACGCCC
AATAAATCCGGACAACGCTCGGGACCTACGTATTA
>OTU_330
GGACTACACGGGTTTCTAATCCTGTTTGCTCCCCGCACCTTCGCACCTCAGCGTCAGTCGTCCGCCGGTATCCTGCCTTC
GCCATCGGTGTTCTTCCGCATATCTACAGATTTCACCCCTTCACGCGGAATTCCGGATACCCTTCGGCAACTCTAGCTCG
CCAGTTCTCAATATAGCTCCGGAGTTGAGCCCCGGTATTTCTTACCAAGCTTGGCGACCCGCCTGCATGCCCTTTACGCC
CAATAATTCCGAACAACGCTCGCACCTTACGTGTT
>OTU_331
GGACTACCGGGGTTTCTAATCCTGTTTGCTCCCCTAGCTTTCGTGCCTCAGTGTCAGGAGTTGTCCAGGGACTCGCCTTC
GCCACTGGTGTTCCACTTGATATCTACGCATTTCACTGCTACACCAAGTATTCCAGTCCCCCCTCCAACCCTCGAGCAGG
GTAGTTTCCAATGCACTTTCCGAGTTGAGCTCGGAGATTTCACATCCGACTTACCCCACCACCTACGCACCCTTTACGCC
CAGTAAATCCGAACAACGCTTGGGACCTCTGTATT
>OTU_332
GGACTACCGGGGTATCTAATCCTGTTTGCTCCCCACGCTTTCGAGCCTCAACGTCAGTTACAGTCCAGTAAGCCGCCTTC
GCCACTGGTGTTCCTCCTAATATCTACGCATTTCACCGCTACACTAGGAATTCCGTTTACCTCTCCTGCACTCCAGCCTG
GCAGTTCCAAATGCAGTCCCAGGGTTGAGCCCTGGGTTTTCACATCTGGCTTGTCATGCCGTCTACGCTCCCTTTACACC
CAGTAAATCCGGATAACGCTTGCCCCCTACGTATT
>OTU_333
GGACTACACGGGTTTCTAATCCTGTTTGCTCCCCACACTTTCGAGCCTCAGCGTCAGTTAAAGCCCAGCAGGCCGCCTTC
GCCACTGGTGTTCCTCCGAATATCTACGCATTTCACCGCTACACTCGGAATTCCGCCTGCCTCTACTTCACTCAAGGGAA
ACAGTTTCAATGGCAGTCGATGGGTTAAGCCCATCGTTTTCACCACTGACTTGCTTCTCCGCCTGCGCTCCCTTTACACC
CAGTAATTCCGGACAACGCTTGCCCCCTACGTATT
>OTU_334
GGACTACCCGGGTTTCTAATCCCGTTCGCTACCCTGGCTTTCGCATCTGAGCGTCAGACACAGTCCAGAAAGGCGCCTTC
GCCACCGGTGTTCTTCCCAATATCTACGCATTTCACCGCTACACTGGGAGTTCCCCTTTCCTCTCCTGCACTCAAGTTCC
GCAGTTTCGATCGCCATACGGCGTTAAGCACCGCATTTTCACGACCGACTTACCAAACCGCCTACATGCGCTTTACGCCC
AATAATTCCGGACAACGCTTGCCACCTACGTATTA
>OTU_335
GGACTACTCGGGTTTCTAATCCTGTTTGCTCCCCACGCTTTCGAGCCTCAACGTCAGTTACCGTCCAGTAAGCCGCCTTC
GCCACTGGTGTTCCTCCTAATATCTACGCATTTCACCGCTACACTAGGAATTCCGCTTACCTCTCCGGCACTCTAGAACA
ACAGTTTCCAATGCAGTCCTGGGGTTAAGCCCCAGCCTTTCACATCAGACTTGCTCTTCCGTCTACGCTCCCTTTACACC
CAGTAAATCCGGATAACGCTTGCCCCCTACGTATT
>OTU_336
GGACTACCAGGGTTTCTAATCCCGTTTGCTACCCTGGCTTTCGCGTCTCAGTGTCTGTTAAGGCCCAGTAGATCGCTTTC
GCCTCTGGTGTTCTTCCGGATATCTACGCATTTCACCACTACTCCCGGAGTTCCATCTACCTCTGCCTTCCTCTAGCTCT
ACAGTCTTGAACGTCCTCTCTCAGTTTAGCCGAGAGCTTTTACATCCAACTTGTATTGCCTCCTACACGCTCTTTACGCC
CAGTAAATCCGGATAACGCTCGTCTCCTACGTTTT
>OTU_337
GGACTACTCGGGTTTCTAATCCGGTTTGCTCCCCTGGCTTTCGAGCCTCAGCGTCAGTAACAGCCCAGAAAAGCGCCTTC
GCCACTGGCCTTCCTACCGGTCTCTACGGATTTCACCCCTACACCGGTAATTCCCTCTTCCTCTGCTGTACTCAAGATTG
TCAGTTTCCAGCCCTATCCCCTGGTTGAGCCAGGGACTTTCACACCGGACTTGACCTCCCGCCTACGCTCCCTTTACGCC
CAGTAATTCCGGGTAACGCTTGCCCCCTACGTCTT
>OTU_338
GGACTACTCGGGTTTCTAATCCTGTTTGCTCCCCACACTTTCGAGCCTCAGCGTCAGTAAAAGCCCAGCAGGCCGCCTTC
GCCACTGGTGTTCCTCCTAATATCTACGCATTTCACCGCTACACTAGGAATTCCGCCTGCCTCTACTTCACTCAAGACCA
ACAGTTTCCGCCGCAGCTACCGGTTGAGCCGATAGATTTAACAACGGACTTGCTGACCCGCCTACGCTCCCTTTACACCC
AGTAATTCCGGACAACGCTCGCTCCCTACGTATTA
>OTU_339
GGACTACAGGGGTATCTAATCCTGTTTGCTCCCCACGCTTTCGCGCCTCAGCGTCAGTTGCTGTCCAGCAGACCGCCTTC
GCCACTGGTGTTCCTCCTAATATCTACGCATTTCACCGCTACACTAGGAATTCCGTCTGCCTCTCCAGTACTCAAGAACA
GCAGTTTCAAATGCAGGCTATGAGTTGAGCCCATAGTTTTCACATCTGACTTACCATCCCGCCTACACGCCCTTTACACC
CAGTAAATCCGGATAACGCTTGCCACCTACGTATT
>OTU_340
GGACTACTGGGGTTTCTAATCCCGTTTGCTCCCCTGGCCTTCGTGCCTCAGCGTCAGTAACTGTCCAGAGACTCGCCTTC
GCCACTGGTCTTCCTTACGATATCTACGCATTTCACTGCTACACCGTAAATTCCAGTCTCCTCTCCAGTACTCTAGCAAG
GCAGTATCGAATGCAGTTCCAGGGTTGAGCCCTGGGATTTCACATCCGACTTACCCCGCCGCCTACGCACCCTTTACGCC
CAATGAATCCGAACAACGCTTGAGACCTCTGTATT
>OTU_341
GGACTACTGGGGTATCTAATCCTGTTTGCTACCCATACTTTCGAGCCTCAGCGTCAGTTGGTGCCCAGTAGGCCGCCTTC
GCCACTGGTGTTTCTCCCGATATCTACGCATTCCACCGCTACACCGGGAATTCCGCCTACCTCTGCACTACTCAAGAACT
ACAGTTTTGAGTGCGGATACGGGTTAAGCCCGTAGATTTGACACCCAACTTGCAGTTCCGCCTGCGCTCCCTTTACACCC
AGTAATTCCGGACAACGCTTGCCACCTACGTTTTA
>OTU_342
GGACTACTCGGGTTTCTAATCCTGTTCGATACCCACGCTTTCGAGCTTCAGCGTCAGTTACACTACGGAAAGCTGCCTTC
GCAATCGGAGTTCTTCGTCATATCTAAGCATTTCACCGCTACACGACGAATTCCGCCTTCCTACCGTGCACTCAAGTCTG
CCAGTTCGCGCTGCAGTGCCCCGGTTGAGCCACGACATTTCACAACACGCTTAACAGACGGCCTACGCTCCCTTTAAACC
CAATAAATCCGGATAACGCCCGGACCTTCCGTATT
>OTU_343
GGACTACTCGGGTATCTAATCCTGTTTGCTCCCCACACTTTCGTGCCTCAACGTCAGTTTCAGTCCAGTAAGTCGCCTTC
GCCACTGGTGTTCCTCCTAATATCTACGCATTTCACCGCTACACTAGGAATTCCACTTACCTCTCCTGTACTCAAGAAAT
ATAGTTTTAGTTGCAGTTCCTCAGTTAAGCCGAGGTATTTCACAACTAACTTGTATTCCCGTCTACGCACCCTTTACACC
CAATAAATCCGGATAACGCTCGCTCCCTACGTATT
>OTU_344
GGACTACCAGGGTTTCTAATCCTGTTTGCTCCCCACGCTTTCGTGCCTCAGTGTCAGTTACAGTCCAGAAAGCCGCCTTC
GCCGCTGGTGTTCCTCCTAATATCTACGCATTTCACCGCTACACTAGGAATTCCGCTTTCCCCTCCTGCACTCAAGTAGT
CCAGTTCGCAAGGCGAGATGCAGTTGAGCTGCACGCTTAAACCTTACGCTTAGATAACCACCTACGCACTCTTTACGCCC
AATAATTCCGGATAACGCTTGCCCCCTACGTATTA
>OTU_345
GGACTACTCGGGTTTCTAATCCTGTTTGCTACCCACGCTTTCGCGCCTCAGCGTCAATACCGGTCCAGACAGCCGCCTTC
GCCACTGATGTTCTTCCAGATATCTACGGATTTCACTCCTACACCTGGAATTCCGCTGTCCTCTCCCGGATCCAAGTTAT
GCAGTATCAAAGGCAGTTCCACGGTTAAGCCGTGGGATTACACCTCTGACTTACAAAACAACCTACGCGCGCTTTACGCC
CAGTAATTCCGATTAACGCTTGCACCCTCCGTATT
>OTU_346
GGACTACCGGGGTATCTAATCCGGTTCGCTCCCCTGGCTTTCGCTCCTCAGCGTCAGCAACAGACCAGAAAGCCGTCTTC
ACCACTGGTGTTCCTCCCGATATCTACGCATTTCACCGCTACACCGGGAATTCCACTTTCCTTTTCTGTCCTCAAGCCGG
TCGGTTTCCCGCGACCCTCCCCGGTTGAGCCGGGGGATTTTACGCGAGACCTGATCGGCCGCCTACGAGCTCTTTACGCC
CAGTAAATCCGGACAACGCTTGCTCCTTACGTATT
>OTU_347
GGACTACAGGGGTTTCTAATCCTGTTTGCTCCCCACGCTTTCGTGCCTCAGTGTCAGTATTAGGCCAGGTAGCCGCCTTC
GCCACTGGTGTTCCTTCCGATCTCTACGCATTTCACCGCTACACCGGAAATTCCACTACCCTCTCCTATACTCGAGTCTT
TCAGTCTTATCTGACATGCCCAGGTTGAGCCCAGGGATTTTACAGATAACTTAAAAAACAACCTACGCACCCTTTACGCC
CAGTAATTCCGATTAACGCTCGCACCCTCCGTATT
>OTU_348
GGACTACTCGGGTTTCTAATCCTGTTTGATCCCCACGCTTTCGAGCCTCAGTGTCAATATCTCCGTAGTAAGCTGCCTTC
GCAATGGGTGTTCTATGTCATATCTAAGCATTTCACCGCTACATGACATATTCCGCTTACCTCCAGAGAATTCAAGACTG
ATAGTATCAATGGCAGTTCCCAAGTTAAGCTCGGGGATTTCACCACTGACTTACCAGCCCACCTACGCTCCCTTCGTATT
ACCGCGGCGGCTGGCACCTGTCTCTTATACACATC
>OTU_349
GGACTACTAGGGTTTCTAATCCTGTTTGCTCCCCACGCTTTCGTACCTCAGCGTCAGTTACAGTCCAGAAAGTCGCCTTC
GCCACTGGTGTTCCTCCTAATATCTACGCATTTCACCGCTACACTAGGAATTCCACTTTCCCCTCCTGCACTCAAGTCTG
ACAGTTCGCAAGGCTGACATTGGTTGAGCCTATGCCTTTCACCTTGCGCTTACCAGACCGCCTACGTACTCTTTACGCCC
AATAATTCCGGACAACGCTTGCCCCCTACGTATTA
>OTU_350
GGACTACTCGGGTATCTAATCCTGTTTGCTCCCCACGCTTTCGAGCCTCAGCGTCAGTAAAAGCCCAGTAAGCCGCCTTC
GCCACCGATGTTCCTCCTAATATCTACGCATTTCACCGCTACACTAGGAATTCCGCTTACCTCTACTTCACTCAAGAACA
ACAGTTTCAAATGCAATCTACAGGTTGAGCCCATAGTTTTCACATCTGACTTGCTATCCCGCCTACGCTCCCTTTACACC
CAGTAATTCCGGACAACGCTCGCTCCCTACGTATT
>OTU_351
GGACTACCGGGGTTTCTAATCCTGTTTGCTCCCCACGCTTTCGTGCCTGAGCGTCAGTGCTGGCCCAGGGGGCTGCCTTC
GCCATCGGTGTTCCTCCTGATCTCTACGCATTTCACTGCTACACCAGGAATTCCACCCCCCTCTGCCGCACTCTAGCCTT
CCAGTCCCAAACGCCATTCCCAAGTTAAGCTCGGGGATTTCACGTCTGGCTTAAAAAACCGCCTGCGCACGCTTTACGCC
CAGTAATTCCGATTAACGCTCGCACCCTACGTATT
>OTU_352
GGACTACTCGGGTTTCTAATCCTGTTTGCTCCCCACGCCTTCGAGCCTCAACGTCAGTTGTCGTCCAGTAAGCCGCCTTC
GCCTCCGGTGTTCCTCCTAATATCTACGCATTTCACCGCTACACTAGGAATTCCGCTTACCCCTCCGACACTCAAGCCAA
ACAGTTTCCAAAGCAATTCATGGGTTGAGCCCATGCATTTCACTTCAGACTTGCTTCGCCGTCTGCGCTCCCTTTACACC
CAGTAAATCCGGATAACGCTTACCCCCTACGTATT
>OTU_353
GGACTACCGGGGTTTCTAATCCTGTTTGCTCCCCACGCTTTCGAGCCTCAACGTCAGTTATCGTCCAGTGAGCCGCCTTC
GCCACTGGTGTTCCTCCTAATATCTACGCATTTCACCGCTACACTAGGAATTCCACTCACCTCTCCGACACTCTAGTTAT
ACAGTTTCCAATGCAGGTCCAGGGTTAAGCCCTGGAATTTCACATCAGACTTGCACAACCGTCTACGCTCCCTTTACACC
CAGTAAATCCGGATAACGCTTGCTCCATACGTATT
>OTU_354
GGACTACTAGGGTTTCTAATCCTGTTTGCTCCCCACGCTTTCGTGCATGAGCGTCAGTGCAGGCCCAGGGGATTGCCTTC
GCCATCGGTGTTCCTCCGCATATCTACGCATTTCACTGCTACACGCGGAATTCCATCCCCCTCTGCCGCACTCTAGCCGT
GCAGTCACAAATGCAGTTCCCAGGTTAAGCCCGGGGATTTCACACCTGTCTTACATAACCGCCTGCGCACGCTTTACGCC
CAGTAATTCCGATTAACGCTTGCACCCTACGTATT
>OTU_355
GGACTACAAGGGTTTCTAATCCTGTTCGCTCCCCACGCTTTCGCTCCTCAGCGTCAGTTACAGACCAGAGAGTCGCCTTC
GCCACTGGTGTTCCTCCACATCTCTACGCATTTCACCGCTACACGTGGAATTCCACTCTCCTCTTCTGCACTCAAGTTCC
CCAGTTTCCAATGACCCTCCCCGGTTGAGCCGGGGGCTTTCACATCAGACTTAAGAAACCGCCTGCGAGCCCTTTACGCC
CAATAATTCCGGACAACGCTTGCCACCTACGTATT
>OTU_356
GGACTACTGGGGTTTCTAATCCTGTTCGATCCCCACGCTTTCGTGCCTCAGCGTCAGTCGGGCGCCGGTACGCTGCCTTC
GCAATCGGAGTTCTGCGCAATATCTATGCATTTCACCGCTACACCGCGCATTCCGCGTACTTCTCGCCCACTCTAGACTG
CCAGTTTCAACGGCGGCAGGCGGTTGAGCCGCCCGTTTTGACCGCTGACTTAACTGTCCGCCTACGCACCCTTTAAACCC
AATAAATCCGGATAACGCTCGCATCCTCCGTATTA
>OTU_357
GGACTACCGGGGTTTCTAATCCTGTTTGCTCCCCACGCTTTCGCACATGAGCGTCAGTACATTCCCAAGGGGCTGCCTTC
GCCTTCGGTATTCCTCCACATCTCTACGCATTTCACCGCTACACGTGGAATTCTACCCCTCCCTAAAGTACTCTAGACTC
CCAGTCTGAAATGCAATTCCCAGGTTAAGCCCGGGGATTTCACACCTCACTTAAAAGTCCGCCTGCGTGCCCTTTACGCC
CAGTTATTCCGATTAACGCTCGCACCCTCCGTATT
>OTU_358
GGACTACCCGGGTTTCTAATCCTGTTTGCTACCCACGCTTTCGAGCATGGACGTCAGTGTTATCCCAGGGGGCTGCCTTC
GCCATCGGTATTCCTCCACATCTCTACGCATTTCACTGCTACACGTGGAATTCTACCCCCCTCTGACACACTCTAGCTAT
CCAGTTCAGAACGCAGTTCCCAGGTTAAGCCCGGGGATTTCACATCCTGCTTAAATAACCGTCTGCGCTCGCTTTACGCC
CAGTAATTCCGATTAACGCTCGCACCCTACGTATT
>OTU_359
GGACTACAGGGGTTTCTAATCCTGTTCGATACCCGCACCTTCGAGCCTCAGCGTCAGTTACGCTCCGGATGGCTGCCTTC
GCGATCGGAGTTCTTCAGGATATCTAAGCATTTCACCGCTACACTCTGAATTCCGCCATCCCTGTGCGTACTCAAGAAAT
ATAGTTTCAACTGCATAACAGAGTTGGGCTCTGATATTTAACAGCTGACTTATACTCCCGCCTGCGCTCCCTTTAAACCC
AATAATTCCGGATAACGCCCGGACCTTCCGTATTA
>OTU_360
GGACTACTAGGGTTTCTAATCCTGTTTGCTCCCCACGCTTTCGCGCCTCAGCGTCAGTTGCTGTCCAGCAGACCGCCTTC
GCCACTGGTGTTCCTCCTAATATCTACGCATTTCACCGCTACACTAGGAATTCCGTCTGCCTCTCCAGTACTCAAGAACT
ACAGTTTCAAATGCAGGCCACAGGTTGAGCCCGTGGTTTTCACATCTGACTTGCAATCCCGCCTACACGCCCTTTACACC
CAGTAAATCCGGATAACGCTTGCCACCTACGTATT
>OTU_361
GGACTACACGGGTTTCTAATCCGGTTCGCGCCCCTGGCTTTCGTTACTCACCGTCAGGTTCGTTCCAGTTAGACGCCTTC
GCCACAGGTGGTCCTCCCAGGATTATAGGATTTCACCCCTACCCTGGGAGTACCTCTAACCTCTCCCGACCTCAAGCCTG
ATAGTATCTCCAGCAATTCCCACAGTTAAGCTGCGGGATTTCACCAGAGACTTATCAGGCCGGCTACGAACGCTTTAGGC
CCAATAAAAACGGCCACCACTTGAGCTGCCGGTGT
>OTU_362
GGACTACCAGGGTTTCTAATCCTGTTTGCTCCCCACGCTTTCGAGCCTCAACGTCAGTTACAGTCCAGTAAGCCGCCTTC
GCCACTGGTGTTCCTCCTAATATCTACGCATTTCACCGCTACACTAGGAATTCCACTTACCTCTCCTGCACTCTAGTTTA
CCAGTTTCCAAAGCAGTTCCGGGGTTGAGCCCCGGGCTTTCACTTCAGACTTGGTCTACCGTCTACGCTCCCTTTACACC
CAGTAAATCCGGATAACGCTTGCCCCCTACGTATT
>OTU_363
GGACTACACGGGTTTCTAATCCTGTTTGCTCCCCACGCTTTCGTGCCTCAGCGTCAGTGTCAGTCCAGAAAGCCGCCTTC
GCCACTGGTGTTCCTCCTAATATCTACGCATTTCACCGCTACACTAGGAATTCCGCTTCCCTCTCCTGAACTCTAGTCGC
CCAGTTTTGAATGCACCCCCCAAGTTAAGCCCGGGTATTTCACATCCAACTTAAGCAACCGCCTACGCACCCTTTACGCC
CAGTAATTCCGGACAACGCTCGCCCCCTACGTATT
>OTU_364
GGACTACTCGGGTTTCTAATCCTGTTTGCTACCCACGCTTTCACGCCTCAGCGTCAGTTAGGTTCCAGCAGATCGCTTTC
GCAATGGGTATTCTTCTTGATCTCTACGGATTTTACCCCTACACCAAGAATTCCATCTACCTCTCCCCTACTCTAGACTA
TCAGTTTCCTAAGCAGTTTAGTGGTTAAGCCACTAGATTTCACAAAAGACTTGATAATCCGCCTACGCGTCCTTTACGCC
CAGTGATTCCGAGTAACGCTTGCACCCCCCGTATT
>OTU_365
GGACTACTGGGGTTTCTAATCCTGTTCGCTCCCCACGCTTTCGCGCCTCAGCGTCAGTTACGGCCCAGTAAGTCGCCTTC
GCCACTGGTGTTCCTCCCAATCTCTACGCATTTCACCGCTACACTGGGAATTCCACTTACCTCTTCCGCACTCAAGCTCT
CCAGTCTCCAAAGCAGTCCCCACCTTGAAAATGGGGCTTTCACTCCAGACTTAAAAAGCCGCCTACACGCCCTTTACGCC
CAGTCATTCCGGACAACGCTCGCCCCCTACGTATT
>OTU_366
GGACTACTGGGGTTTCTAATCCTGTTCGATACCCACGCTTTCGTGCTTCAGCGTCAGTTGGGCGCCGGTATGCTGCCTTC
GCAATCGGGGTTCTGCGTGATATCTATGCATTTCACCGCTACACCACGCATTCCGCATACTTCTCGCCCACTCAAGGACT
CCAGTTTCAACGGCACGACGGGGTTGAGCCCCGAATTTTTACCGCTGACTTGGAGTTCCGCCTACGCACCCTTTAAACCC
AATAAATCCGGATAACGCTCGCATCCTCCGTATTA
>OTU_367
GGACTACTAGGGTTTCTAATCCTGTTTGCTCCCCACGCTTTCGAGCCTCAACGTCAGTTACCGTCCAGTAAGCCGCCTTC
GCCACTGGTGTTCCTCCTAATATCTACGCATTTCACCGCTACACTAGGAATTCCGCTTACCTCTCCGGCACTCCAGATCA
ACAGTTTCCAATGCAGTCCCGGGGTTGAGCCCCGGGTTTTCACATCAGACTTGCTGCTCCGTCTACGCTCCCTTTACACC
CAGTAAATCCGGATAACGCTTGCCCCCTACGTATT
>OTU_368
GGACTACTCGGGTTTCTAATCCTGTTTGCTCCCCACGCTTTCGTGCATGAGCGTCAATCTTGACCCAGGGGGCTGCCTTC
GCCATCGGTGTTCCTCCACATCTCTACGCATTTCACTGCTACACGTGGAATTCTACCCCCCTCTGCCAGATTCTAGCCTT
GCAGTCTTCATCGCCATTCCCAGGTTGAGCCCGGGGATTTCACGACAAACTTACAAAACCGCCTGCGCACGCTTTACGCC
CAGTAATTCCGATTAACGCTTGCACCCTACGTATT
>OTU_369
GGACTACTCGGGTTTCTAATCCTGTTTGATACCCGCACTTTCGAGCCTCAGCGTCAGTGCTGCCCCGGCACAATGCCTTC
GCGATCGGAGTTCTTCGTGATATCTAAGCATTTCACCGCTACACCACGAATTCCATGTGCCCTGTGCAGACTCAAGGCTT
GCAGTTTCAACGGCTGGCCACGGTTGAGCCGTGACATTTGACCGCTGACTTAAAAGCCCGCCTACGCTCCCTTTAAACCC
AATAAATCCGGATAACGCTCGCATCTTCCGTATTA
>OTU_370
GGACTACAAGGGTTTCTAATCCTGTTTGCTCCCCACGCTTTCGAGCCTCAGCGTCAGTTAAAGCCCAGTAAGCCGCCTTC
GCCACTGATGTTCCTCCTAATATCTACGCATTTCACCGCTACACTAGGAATTCCGCTTACCTCTACTTCACTCAAGAACC
ACAGTTTCAAATGCAGTTTATGGGTTAAGCCCATAGTTTTCACATCTGACTTGCGATCCCACCTACGCTCCCTTTACACC
CAGTAATTCCGGACAACGCTCGCTCCCTACGTATT
>OTU_371
GGACTACTGGGGTTTCTAATCCTGTTTGCTCCCCACGCTTTCGCGCCTCAGCGTCAGTTATGGACCAAGAGACCGCCTTC
GCCACTGGTGTTCTTCCAGATATCTACGTATTTCACCTCTACACCAGGAATTCCACTTCCCTCTACCATATTCAAGAAGT
ACGGTTTCAAATGCACTTCCGGGGGTGAGCCCCGGGCTTTCACATCTGACCTGCACTTCCGCCTGCGCGCCCTTTACGCC
CAATAATTCCGAATAACGCTTGCACCCCCCGTGTT
>OTU_372
GGACTACCCGGGTATCTAATCCTGTTTGCTCCCCACGCTTTCGTGCCTCAACGTCAGATATAGTTTGGTAAGCTGCCTTC
GCAATCGGTGTTCTGTATGATCTCTAAGCATTTCACCGCTACACCATACATTCCGCCTACCGCAACTACTCTCTAGTTCA
ACAGTATTAGAGGCAGTTCCGGTGTTAAGCACCGGTATTTCACCTCTAACTTATCAAACCGCCTACGCACCCTTTAAACC
CAATAAATCCGGATAACGCTTGGATCCTCCGTATT
>OTU_373
GGACTACTCGGGTTTCTAATCCTGTTTGCTCCCCACGCTTTCGTGTCTCAGCGTCAGTTGTGGTCCAGTAAACCGCCTTC
GCCACCGGTGTTCCTCCTGATATCTACGCATTTCACTACTACACCAGGAATTCCGTTTACCTCTCCCACTCTCAAGAGTA
TCAGTTTCAAATGCAGTTTGTGGGTTGAGCCCACAGTTTTCACATCTGACTTGACACCCCGCCTACACACCCTTTACACC
CAGTAATTCCGGATAACGCTCGCCACCTACGTATT
>OTU_374
GGACTACCGGGGTTTCTAATCCTGTTTGCTCCCCACGCTTTCGAGCCTCAACGTCAGTCACTGTCCAGCAAGCCGCCTTC
GCCACTGGTGTTCCTCCTAATATCTACGCATTTCACCGCTACACTAGGAATTCCACTTGCCTCTCCAGCACTCCAGGTCA
ACAGTTTCCAAAGCAGTCCCGGGGTTGAGCCCCGGGCTTTCACTTCAGACTTGCTATCCCGTCTACGCTCCCTTTACACC
CAGTAAATCCGGATAACGCTTGCCCCCTACGTATT
>OTU_375
GGACTACCAGGGTTTCTAATCCTGTTTGCTCCCCACGCTTTCGCGCCTCAGCGTCAGTGTTGGTCCAGTTGGCCGCCTTC
GCCACTGGTGTTCTTGCGAATATCTACGAATTTCACCTCTACACTCGCAGTTCCACCAACCTCTACCAAACTCAAGCCAA
ACAGTATCGAAGGCAATTCTGTGGTTGAGCCACAGGCTTTCACCCCCGACTTGAATGGCCGCCTACGCGCCCTTTACGCC
CAGTGATTCCGAGCAACGCTAGCCCCCTTCGTATT
>OTU_376
GGACTACTCGGGTTTCTAATCCTGTTTGCTCCCCACGCTTTCGCGCCTCAGCGTCAGTTATCGTCCAGTAGACCGCCTTC
GCCACTGGTGTTCCTCCTAATATCTACGCATTTCACCGCTACACTAGGAATTCCGTCTACCTCTCCGACACTCAAGAGAT
ACAGTTTCAAATGCAGTTTATGGGTTAAGCCCATAGATTTCACATCTGACTTGTATCCCCGCCTACGCGCCCTTTACACC
CAGTAAATCCGGATAACGCTTGCCACCTACGTATT
>OTU_377
GGACTACTGGGGTTTCTAATCCCGTTCGCTCCCCACGCTTTCGAGCCTCAGCGTCAGTTATGCGCCAGAAAGCCGCTTTC
GCCACCGGTGTTCCTCCAGATATCTACGCATTTCACCGCTACACCTGGAATTCCGCTTTCCTATCGCACACTCAAGCCAG
GCAGTATCCAAAGCTATTCCGGGGTTAAGCCCCGGGCTTTCACTTCAGACTGACTTGGCCGCCTGCGCTCCCTTTACGCC
CAGTCATTCCGAACAACGCTTGCAACCTCCGTATT
>OTU_378
GGACTACTGGGGTTTCTAATCCTGTTTGCTACCCATGCTTTCGTGCCTCAGCGTCAGTTAAAGCCCAGTAGGCCGCCTTC
GCCACTGGTGTTCCTCCCGATCTCTACGCATTTCACCGCTACACCGGGAATTCCGCCTACCTCTACTTCACTCAAGCTAA
ACAGTTTCAAACGCAGTCCACAGGTTGAGCCCATGGTTTTCACGTCTGACTTGCCTAGCCGCCTACGCACCCTTTACACC
CAGTAAATCCGGACAACGCTTGCTCCCTACGTATT
>OTU_379
GGACTACTGGGGTATCTAATCCTGTTTGCTCCCCACGCTTTCGTACCTGAGCGTCAGTAAAAGTCCAGAAAGTCGCCTTC
GCCACCGGTATTCCTCCTAATATCTACGCATTTCACCGCTACACTAGGAATTCCACTTTCCTCTCCTTCACTCAAGTCTT
CCAGTTTCAAGTGCTTAATGAGGTTAAGCCTCACGCTTTCACACCTGACTTAAAAAACCGCCTACGTACCCTTTACGCCC
AATAATTCCGGACAACGCTCGCCCCATACGTATTA
>OTU_380
GGACTACAAGGGTTTCTAATCCTGTTTGCTACCCACGCTTTCGTGCCTCAGCGTCAATGTTGGTCCAGGAAGTCGCCTTC
GCCACTGATGTTCCTTCCGATCTCTATGCATTTCACCGCTACACCGGAAATTCCACTTCCCTCTCCCACATTCTAGCTCC
CCAGTATCAGATGCAGTTCCCAGGTTGAGCCCGGGGATTTCACATCTGACTTAAAGAGCCGCCTACGCACGCTTTACGCC
CAGTAATTCCGATTAACGCTTGCACCCTCCGTATT
>OTU_381
GGACTACCGGGGTATCTAATCCTGTTTGCTCCCCACGCTTTCGAGCCTCAACGCCAGTTACCGTCCAGTAAGCCGCCTTC
GCCACTGGTGTTCCTCCTAATATCTACGCATTTCACCGCTACACTAGGAATTCCGCTTACCCCTCCGGTACTCAAGACTG
GCAGTTTCCAATGCAGTCCAGGGGTTGAGCCCCCGCCTTTCACATCAGACTTGCCATTCCGTCTACGCTCCCTTTACACC
CAGTAAATCCGGATAACGCTTGCCCCCTACGTATT
>OTU_382
GGACTACCCGGGTTTCTAATCCTGTTTGCTCCCCACGCTTTCGCGCCTCAGCGTCAGTTGTCGTCCAGCAGGCCGCCTTC
GCCACTGGTGTTCCTCCTAATATCTACGCATTTCACCGCTACACTAGGAATTCCGCCTGCCTCTCCGATACTCAAGGGAT
ACAGTTTCAAATGCAGTTCCCGGGTTAAGCCCGAGGATTTCACATCTGACTTGCATCTCCGCCTACACGCCCTTTACACC
CAGTAAATCCGGACAACGCTTGCCACCTACGTATT
>OTU_383
GGACTACCAGGGTTTCTAATCCTGTTTGCTCCCCACGCTTTCGCACCTCAGCGTCAGTAATGGACCAGTAAGCCGCCTTC
GCCACTGGTGTTCCTCCGAATATCTACGAATTTCACCTCTACACTCGGAATTCCACTTACCTCTTCCATACTCAAGATAC
CCAGTATCAAAGGCAGTTCCGCAGTTGAGCTGCGGGATTTCACCCCTGACTTAAATATCCGCCTACGTGCGCTTTACGCC
CAGTAATTCCGAACAACGCTAGCCCCCTTCGTATT
>OTU_384
GGACTACCCGGGTTTCTAATCCTGTTTGATCCCCACGCTTTCGTGTCTCAGCGTCAGTTACTGTCCAGTTAGCCGCTTAC
GCCACTGGTATTCCTCCGAATATCTGCGAATTTCACCTCTACACTCGGAATTCTGCTAACCTCTCCAGTACTCTAGCATA
TCAGTTTCAAGAGCAATTCCAGGGTTGAGCCCTGGGATTTCACTCCTGACTTGATACACCGCCTACACACGCTTTACGCC
CAGTGATTCCGAACAACGCTTGCCCCATTCGTATT
>OTU_385
GGACTACCGGGGTTTCTAATCCTGTTTGCTCCCCACGCTTTCGCGCCTCAGCGTCAGTTAATGTCCAGCAAGCCGCCTTC
GCCACTGGTGTTCCTCCTAATATCTACGCATTTCACCGCTACACTAGGAATTCCGCTTGCCTCTCCATCACTCAAGGGAG
ATAGTTTCAAATGCAGTTTATGGGTTAAGCCCATAGATTTCACATCTGACTTGTCTCTCCGCCTACGCGCCCTTTACACC
CAGTAAATCCGGACAACGCTTGCCACCTACGTATT
>OTU_386
GGACTACCAGGGTTTCTAATCCCGTTTGCGCCCTAGGGCTTCGTCCCTCACTGTCGGATTCGTTCTAGGTGAACGCCTTC
GCCACTGGTGGTCCCCCCCGGATTACAGGATTTTACCCCTACCCAGGGAGTACCTTCACCCTCTCCCGATCCCAAGCCGA
GCAGTGTCTCCGGAATTCGGACAGTTGAGCTGCCCGATTTACCCGGAGATTTGCCCGGCCAGCTACGGACGCTTTAGGCT
CAATAATAATGAGCACCACTCGGGCCGCGGGTATT
>OTU_387
GGACTACAAGGGTTTCTAATCCTGTTTGCTACCCACGCTTTCGAGCCTCAGCGTCAGTTAAAGCCCAGTAAGCCGCCTTC
GCCACTGGTGTTCCTCCTAATATTTACGCATTTCACCGCTACACTAGGAATTCCGCTTACCTCTACTTCACTCAAGAAAA
GCAGTTTCGATCGCGACTATGGGTTGAGCCCATAGTTTAGACAATCGACTTGCCTTCCCGCCTACGCTCCCTTTACACCC
AGTAATTCCGGACAACGCTTGCCACCTACGTATTA
>OTU_388
GGACTACCGGGGTTTCTAATCCTGTTTGCTCCCCACGCTTTCGAGCCTCAGCGTCAGTTAATGTCCAGAAAGCCGCCTTC
GCCACTGGTGTTCCTCCTAATATCTACGCATTCCACCGCTACACTAGGAATTCCGCTTTCCTCTCCATCACTCAAGCCCT
GCAGTTTTAAAAGCAGTTCCATAGTTAAGCTATGGGATTTCACTTCTAACTTGCAAAGCCGCCTACGCTCCCTTTACGCC
CAGTCATTCCGGACAACGCTTGCCACCTACGTATT
>OTU_389
GGACTACCCGGGTTTCTAATCCTGTTTGCTCCCCACGCTTTCGCGCCTCAGCGTCAGTTACAGTCCAGAAAGTCGCCTTC
GCCACTGGTGTTCCTCCCAATATCTACGCATTTCACCGCTACACTGGGAATTCCACTTTCCTCTCCTGCACTCGAGTCTA
ATAGTTTCAAATGCAGCCCCAGGGTTAAGCCCTGGTATTTCACATCTGACTTATTAAACCGCCTACTCGCCCTTTACGCC
CAGTAATTCCGGACAACGCTCGCCCCCTACGTATT
>OTU_390
GGACTACTGGGGTTTCTAATCCTGTTTGCTCCCCACACTTTCGTGCCTCAACGTCAGTTTCTGTCCAGAAAGTCGCCTTC
GCCACCGGTGTTCCTCCTAATATCTACGCATTTCACCGCTACACTAGGAATTCCACTTTCCTCTCCAGTACTCAAGAAAA
TCAGTTTTAGTTGCAGTTCCTCAGTTAAGCCGAGGGATTTCACAACTAACTTGACTTCCCGTCTACGCACCCTTTACACC
CAATAAATCCGGATAACGCTCGCTCCCTACGTATT
>OTU_391
GGACTACTGGGGTATCTAATCCTGTTTGCTCCCCACGCTTTCGAGCCTCAGCGTCAGTTAAGGCCCAGCAGGCCGCCTTC
GCCACTGGTGTTCCTCCTAATATCTACGCATTTCACCGCTACACTAGGAATTCCGCCTGCCTCTACCTCACTCAAGAACG
CCAGTTTAGAACGCTGCCACCAGTTGAGCCGATGGATTTAACATTCTACTTGGCATCCCGCCTACGCTCCCTTTACACCC
AGTAATTCCGGACAACGCTCGCTCCCTACGTATTA
>OTU_392
GGACTACCAGGGTATCTAATCCTGTTTGCTCCCCACGCTTTCGCGCCTCAGCGTCAGTTACAGGCCAGAAAGCCGCCTTC
GCCACTGGTGTTCCTCCATATCTCTACGCATTTCACCGCTACACATGGAATTCCGCTTTCCTCTCCTGCACTCAAGTCCC
CCAGTTTCCAATGACCGCTTGCGGTTGAGCCGCAAGATTTCACATCAGACTTAAAGGACCGCCTGCGCGCGCTTTACGCC
CAATGATTCCGGACAACGCTTGCCACCTACGTATT
>OTU_393
GGACTACTCGGGTTTCTAATCCTGTTCGATCCCCACGCTTTCGTGCCTCAGCGTCAATCGCCCCTTCGTGAGATGCCTTC
GCAATCGGTGTTCTGAGTGATATCTATGCATTTCACCGCTACACCACTCATTCCTCCCACGGCAAGGGTATTCTAGCCAA
TCAGTATCAACGGCACTTCCAGGGTTGAGCCCCGGTCTTTCACCGCTGACTTAATTCGCCGCCTACGCACCCTTTAAACC
CAATAAATCCGGATAACGCTCGCATCCCCCGTATT
>OTU_394
GGACTACTCGGGTTTCTAATCCTGTTTGCTCCCCACGCTTTCGCACCTCAGCGTCAGTATCGAGCCAGTGAGCCGCCTTC
GCCACTGGTGTTCCTCCGAATATCTACGAATTTCACCTCTACACTCGGAATTCCACTCACCTCTCTCGAACTCCAGACCG
ATAGTTTCAAAGGCAGTTCCAAGGTTGAGCCCTGGGATTTCACCTCTGACTTTCCGGTCCGCCTACGTGCGCTTTACGCC
CAGTAATTCCGAACAACGCTAGCCCCCTCCGTATT
>OTU_395
GGACTACCAGGGTTTCTAATCCTGTTCGCTCCCCACGCTTTCGTCCATCAGCGTCAATCCACAAGTAGTAACCTGCCTTC
GCAATTGGTATTCCATGTAATATCTAAGCATTTCACCGCTACACTACATATTCTAGTTACTTCCTTGTAATTCAAGTCTA
ACAGTATCAATGGCCGTTCCATCGTTGAGCGATGGGCTTTCACCACTGACTTATTAAACCGCCTACGGACCCTTTAAACC
CAATGATTCCGGATAACGCTTGGATCCTCCGTATT
>OTU_396
GGACTACTGGGGTTTCTAATCCTGTTTGCTCCCCACGCTTTCGCTCCTCAGCGTCAGTAGTTGCCCAGAGACCCGCCTTC
GCCACCGGTGTTCTTCCTGATATCTGCGCATTTCACCGCTACACCAGGAGTTCCAGTCTCCCCTACAACACTCTAGTCAG
CCCGTATCGAATGCAGGCCCGGAGTTAAGCTCCGGGTTTTCACATCCGACGTGACTAACCGCCTACGAGCTCTTTACGCC
CAATAAATCCGGACAACGCTTGCACCCTACGTATT
>OTU_397
GGACTACTCGGGTTTCTAATCCTGTTTGCTCCCCACGCTTTCGTGCATCAGCGTCAATAACGGATTAGATAGCTGCCTTC
GCAATCGGTGTTCTGAGACATATCTATGCATTTCACCGCTACTTGTCTCATTCCGCCATCTTCAACCGAATTCAAGCCAA
ACAGTATCAAAGGCACTGCGACAGTTGAGCTGCCGACTTTCACCCCTGACTTATCTGGCCGCCTACGCACCCTTTAAACC
CAATAATTCCGGATAACGCTCGGATCCTCCGTATT
>OTU_398
GGACTACCGGGGTTTCTAATCCGGCTCGCTCCCCTAGGTTTCGTCCCTCACCGTCAGACCCGTTCCAGTTGGACGCCTTC
GCCACAGGTGGTCCCCCTAGGATTACAGGATTTCACCCCTACCCTAGGAGTACCTCCAACCTCTCCCGGTCTCAAGACAA
GCAGTATCTCTAGAATTCCCACGGTTGAGTCGCAGGATTTAACCAAAGACTTACTTATCCGGCTACGAACGTTTTAGGCC
CAATAATCGCGGCTACCACTTGAGCTGCCGGTATT
>OTU_399
GGACTACAAGGGTTTCTAATCCTGTTTGCTACCCATGCTTTCGAGCCTCAGCGTCAGTTAGTGCCCAGTAGGCCGCCTTC
GCCACTGGTGTTCCTCCCGATATCTACGCATTCCACCGCTACACCGGGAATTCCGCCTACCTCTACACCACTCAAGACTG
ACAGTTTTGAAAGCAATTTATGGGTTGAGCCCATAGATTTCACTCCCAACTTGCCAATCCGCCTGCGCTCCCTTTACACC
CAGTAATTCCGGACAACGCTTGCACCCTACGTTTT
>OTU_400
GGACTACCCGGGTTTCTAATCCTGTTTGCTCCCCACGCTTTCGCGCCTCAGCGTCAGTTGTCGTCCAGCAGGCCGCCTTC
GCCACTGGTGTTCCTCCTAATATCTACGCATTTCACCGCTACACTAGGAATTCCGCCTGCCTCTCCGATACTCAAGAAGA
ACAGTTTCAAAAGCAGTTTATGGGTTAAGCCCATAGATTTCACTTCTGACTTGCTCTCCCGCCTACACGCCCTTTACACC
CAGTAAATCCGGACAACGCTTGCCACCTACGTATT
>OTU_401
GGACTACCCGGGTTTCTAATCCCTTTCGCTCCCCTAGCTTTCGTCCCTCAGCGTCAGTTGTGGCCCAGTAGAGCGCCTTC
GCCACTGGTGTTCTTCCCGATATCTACGCATTTCACCGCTACACCGGGAATTCCCTCTACCCCTACCACACTCTAGTCAT
CCAGTTTCCATTGCCGATCCACAGTTGAGCTGTGACCTTTGACAACAGACTTAAATAACCGCCTGCGGACGCTTTACGCC
CAATAATTCCGGATAACGCTTGCCTCCTCCGTCTT
>OTU_402
GGACTACCCGGGTTTCTAATCCTGTTCGCTCCCCACGCTTTCGAGCCTCAGCGTCAGTTATAGACCAGAAAGTCGCCTTC
GCCACTGGTGTTCCTCCATATATCTACGCATTTCACCGCTACACATGGAATTCCACTTTCCTCTTCTATACTCAAGTTTG
CCAGTTTCCAATGCCGTTCCACGGTTGAGCCGTGGGCTTTCACATCAGACTTAACAAACCGCCTGCGCTCCCTTTACGCC
CAATAAATCCGGACAACGCTTGTGACCTACGTATT
>OTU_403
GGACTACCAGGGTTTCTAATCCTGTTTGCTCCCCACGCTTTCGCGCCTCAGCGTCAGTTAATGTCCAGCAGGCCGCCTTC
GCCACTGGTGTTCCTCCGTATATCTACGCATTTCACCGCTACACACGGAATTCCGCCTGCCTCTCCATCACTCAAGACCA
GCAGTTTTGAAAGCAGTTTATGGGTTAAGCCCATAGATTTCACTTCCAACTTACCGGCCCGCCTGCGCGCCCTTTACACC
CAGTAAATCCGGATAACGCTTGCTCCCTACGTATT
>OTU_404
GGACTACTAGGGTATCTAATCCTGTTTGCTCCCCACGCTTTCGAGCCTCAGCGTCAGTAATCGTCCAGTAAGCCGCCTTC
GCCACCGGTGTTCCTCCTAATATCTACGCATTTCACCGCTACACTAGGAATTCCGCTTACCCCTCCGACACTCTAGCCTG
ACAGTTTCAAAAGCAATTCCGGGGTTGAGCCCCAGGCTTTCACTTCTGACTTGCCATGCCGCCTATGCTCCCTTTACACC
CAGTAAATCCGGATAACGCTTGCCCCATACGTATT
>OTU_405
GGACTACTAGGGTTTCTAATCCTGTTTGCTCCCCACGCTTTCGTGCCTCAGCGTCAGTGTTGCCCCAGATGGCCGCCTTC
GCCACTGGTGTTCCTCCCGATCTCTACGCATTTCACCGCTACACCGGGAATTCCACCATCCTCTGACACACTCTAGCTGG
CCAGTTTCCACTGCAGTTCCCAGGTTGAGCCCAGGGCTTTCACAGCAGACTTAACCAACCGCCTACGCACGCTTTACGCC
CAGTAATTCCGAGTAACGCTTGCACCCTTCGTATT
>OTU_406
GGACTACTGGGGTTTCTAATCCTGTTCGCTACCCACGCTTTCGCTCCTCAGCGTCAGTTACTGCCCAGAGACCCGCCTTC
GCCACCGGTGTTCCTCCTGATATCTGCGCATTCCACCGCTACACCAGGAATTCCAGTCTCCCCTGCAGTACTCTAGTCTG
CCCGTATCGCCCGCACGCCCACAGTTAAGCTGTGGGTTTTCACGAACAACGTGACAAACCACCTACGAGCTCTTTACGCC
CAGTAATTCCGGACAACGCTCGGACCCTACGTATT
>OTU_407
GGACTACTCGGGTATCTAATCCTGTTTGCTCCCCACGCTTTCGCACATGAGCGTCAGTATTGGTCCAGGAAGTCGCTTTC
GCCACTGATGTTCCTTCCGATATCTACGCATTTCACCGCTACACCGGAAATTCCACTTCCCTCTCCCATACTCTAGCAAT
GCAGTCTCGAGTGCAGTTCCCAGGTTAAGCCTGGGGATTTCACACCCGACTTGCAAAGCCGCCTACGCGCGCTTTACGCC
CAGTAATTCCGATTAACGCTCGCACCCTCTGTATT
>OTU_408
GGACTACCAGGGTTTCTAATCCTGTTTGCTCCCCACGCTTTCGCACCTGAGCGTCAGTGTTGTGCCAGGGGGCCGCCTTC
GCCACTGGTATTCCTCCAAATCTCTACGCATTTCACCGCTACACTTGGAATTCTACCCCCCTCTCACACACTCTAGTTCC
CCAGTTTCAAATGCAATTCCCAGGTTGAGCCCGGGGCTTTCACATCTGACTTAAAAAACCGCCTACGTGCGCTTTACGCC
CAGTAATTCCGATTAACGCTTGCACCCTCTGTATT
>OTU_409
GGACTACTAGGGTTTCTAATCCTGTTTGCTCCCCACGCTTTCGAGCCTCAACGTCAGTTACCGTCCAGTAAGCCGCCTTC
GCCACTGGTGTTCTTCCTAATATCTACGCATTTCACCGCTACACTAGGAATTCCGCTTACCTCTCCGGCACTCCAGCTAA
ACAGTTTCCAAAGCAGTCCCGGCGTTAAGCACCGGGCTTTCACTTCAGACTTGCCTTGCCGTCTACGCTCCCTTTACACC
CAGTAAATCCGAATAACGCTTGCCCCCTACGTATT
>OTU_410
GGACTACTGGGGTTTCTAATCCTGTTCGATCCCCACGCTTTCGTGCTTCAGCGTCTGTCCTGGTCTGGTATGCTGCCTTC
GCAATCGGGGTTCTGCGTGATATCTATGCATTTCACCGCTACACCACGCATTCCGCATACCTCTACCTAACGCTAGCCCA
TCAGTTTCAATGGCATGTCTCGGGTTAAGCCCGAGCGTTTCACCGCTGACTTGACAGGCCGCCTACGCACCCTTTAAACC
CAATAAATCCGGATAACGCTCGCATCCTCCGTATT
>OTU_411
GGACTACCGGGGTTTCTAATCCTGTTTGCTCCCCACGCTTTCGAGCCTCAACGTCAGTCATCGTCCAGTAAGCCGCCTTC
GCCACTGGTGTTCCTCCTAATATCTACGCATTTCACCGCTACACTAGGAATTCCACTTACCTCTCCGACACTCTAGCTGC
ACAGTTTCCAAAGCAGTCCATAGGTTGAGCCCATGCCTTTCACTTCAGACTTGCACAGCCGTCTACGCTCCCTTTACACC
CAGTAAATCCGGATAACGCTTGCTCCCTACGTATT
>OTU_412
GGACTACACGGGTTTCTAATCCTGTTTGATCCCCACGCTTTCGTGCATTAGTGTCAGTTACAACTTAGTGAGCTGCCTTC
GCTATTGGTGTTCTGTAGCATATCTATGCATTTCACCGCTACATGCTACATTCCGCCCACTTCAACTGTACTCAAGGCTA
ACAGTATCAACGGCAATTCCCTGGTTGAGCCGGGGGATTTCACCGCTGACTTATAAGCCCACCTACGCACCCTTTAAACC
CAATAAATCCGGATAACGCTTGCATCCTCCGTATT
>OTU_413
GGACTACTGGGGTTTCTAATCCTGTTCGCTCCCCACGCTTTCGCACCTCAGCGTCAGTTATAGGCCAGGAAGCCGCCTTC
GCCACTGGTGTTCCTCCACATCTCTACGCATTTCACCGCTACACGTGGAATTCCGCTTCCCTCTCCTACACTCAAGTCCC
CCAGTTTCCAATGACCCTCCACGGTTGAGCCGTGGGCTTTCACATCAGACTTAAGAGACCGCCTGCGCGCGCTTTACGCC
CAATAATTCCGGACAACGCTTGCCCCCTACGTATT
>OTU_414
GGACTACTCGGGTTTCTAATCCTGTTTGATCCCCACGCTTTCGTGCATCAGCGTCAGTAATGACCCAGCAAGCTGCCTTC
GCAATCGGTGTTCTGTGTAATATCTAAGCATTTCACCGCTACATTACACATTCCGCCTGCCTTGACCACACTCAAGACTA
ACAGTATCAACGGCAAGTCTACAGTTAAGCTGTAGAATTTCACCACTGACTTATCAATCCGCCTACGCACCCTTTAAACC
CAATAAATCCGGATAACGCTCGCATCCTCCGTATT
>OTU_415
GGACTACACGGGTTTCTAATCCTGTTTGCTCCCCACGCTTTCGTGCCTCAGTGTCAGTTTCAGTCCAGTAAGCCGCCTTC
GCCACTGGTGTTCCTCCTAATATCTACGCATTTCACCGCTACACTAGGAATTCCGCTTACCTCTCCTGTACTCTAGTTTG
ATAGTTTCAAATGCAGTTCCAAGGTTGAGCCCTGGATTTTCACATCTGACTTACCAAACCACCTGCGCACCCTTTACACC
CAGTCATTCCGGATAACGCTTGCCCCCTACGTATT
>OTU_416
GGACTACTGGGGTATCTAATCCGGTTCGCGCCCCTAGCTTTCGTCCCTCACCGTCAGAATCGTTCCAGTCAGACGCCTTC
GCAACAGGCGGTCCTCCCAGGATTACAGAATTTCACCTCTACCCTGGGAGTACCTCTAACCTCTCCCGATCTCAAGTCTA
ATAGTATCTCCAGCAATTCCCACAGTTAAGCTGCAGGATTTCACCAGAGACTTATTAAACCGGCTACGGACGCTTTAGGC
CCAATAAAAACTGCTACCACTAGAGCTGCCGGTGT
>OTU_417
GGACTACTGGGGTATCTAATCCTGTTTGCTCCCCACGCTTTCGTGCATGAGCGTCAGTGTTATCCCAGGGGGCTGCCTTC
GCCATCGGTATTCCTCCACATCTCTACGCATTTCACTGCTACACGTGGAATTCTACCCCCCTCTGACACACTCTAGCCGT
GCAGTCACCAATGCAATTCCCAAGTTAAGCTCGGGGATTTCACATCGGTCTTGCACAACCGCCTGCGCACGCTTTACGCC
CAGTAATTCCGATTAACGCTTGGACCCTACGTATT
>OTU_418
GGACTACCAGGGTTTCTAATCCTGTTTGCTACCCACACTTTCGAGCCTCAGCGTCAGTTGGTGCTCAGTAGGCCGCCTTC
GCCACTGGTGTTCCTTCCGATATCTACGCATTCCACCGCTACACCGGGAATTCCGCCTACTTCTGCACTACTCAAGAAAA
ACAGTTTTGAAAGCAGTTCATGGGTTGAGCCCATGGATTTCACTTCCAACTTGTTCTCCCGCCTGCGCTCCCTTTACACC
CAGTAATTCCGGACAACGCTTGTGACCTACGTTTT
>OTU_419
GGACTACTCGGGTTTCTAATCCTGTTTGCTCCCCACGCTTTCGCGCCTCAGCGTCAGTTATCGTCCAGTTGACCGCCTTC
GCCACTGGTGTTCCTCCTAATATCTACGCATTTCACCGCTACACTAGGAATTCCGTCAACCTCTCCGACACTCAAGAAAT
ACAGTTTCAAATGCAGTTCAAGGGTTGAGCCCTTGGATTTCACATCTGACTTGCATTCCCGCCTACGCGCCCTTTACACC
CAGTAAATCCGGATAACGCTCGCCACCTACGTATT
>OTU_420
GGACTACTAGGGTTTCTAATCCTGTTTGCTCCCCACGCTTTCGAGCCTCAACGTCAGTTACCGTCCAGTAAGCCGCCTTC
GCCACTGGTGTTCCTCCTAATATCTACGCATTTCACCGCTACACTAGGAATTCCGCTTACCCCTCCGGTACTCTAGCTGC
ACAGTTTCCAAAGCCATTCCGGGGTTGAGCCCCGGGCTTTCACTTCAGACTTGCGCTGCCGTCTACGCTCCCTTTACACC
CAGTAAATCCGGATAACGCTTGCCCCCTACGTATT
>OTU_421
GGACTACTCGGGTTTCTAATCCTGTTTGCTCCCCACACTTTCGAGCCTCAGCGTCAGTTAAAGCCCAGTTGGCCGCCTTC
GCCACCGGTGTTCCTCCGAATATCTACGCATTTCACCGCTACACTCGGAATTCCGCCAACCTCTACTTCACTCAAGATGA
ACAGTTTCAACTGCAGTCTACGGGTTAAGCCCGTAGTTTTCACAGCTGACTTGATCACCCGCCTGCGCTCCCTTTACACC
CAGTAATTCCGGACAACGCTTGCCACCTACGTATT
>OTU_422
GGACTACCGGGGTTTCTAATCCTGTTTGCTCCCCACGCTTTCGTGCATGAGCGTCAATATTATCCCAGGGGGCTGCCTTC
GCCATTGGTATTCCTCCACATCTCTACGCATTTCACTGCTACACGTGGAATTCTACCCCCCTCTGACATATTCTAGTCTT
GTAGTTTCAAACGCAGTTCCCAAGTTGAGCTCGGGGATTTCACATCTGACTTACAAAACCGCCTGCGCACGCTTTACGCC
CAGTAATTCCGATTAACGCTCGCACCCTACGTATT
>OTU_423
GGACTACTGGGGTTTCTAATCCTGTTTGATACCCACACCTTCGCAGTTGAGCGTCAATAACGGCTTGGAAGACTGCCTTC
GCCTTCGGTATTCCTCCTGATCTCTGCGCATTCCACCGCTACACCAGGAATTCTGTCTTCCCCAACCGCATTCCAGATCC
ACAGTATCTACCGCCCTACGCCGGTTAAGCCGACGCCTTAAACGATAAACTTATGGATCCGCCTGCCTGCCCTTTACGCC
TAGTAATTCCGGACAACGCTCGCAACCCCCGTGTT
>OTU_424
GGACTACTGGGGTTTCTAATCCTGTTTGCTACCCATGCTTTCGCTCCTCAGCGTCAGTAACTGCCCAGTAACCTGCCTTC
GCCATCGGTGTTCCTCCTGATATCTGCGCATTTCACCGCTACACCAGGAATTCCAGTTACCCCTACAGTACTCAAGTCAG
CCCGTATCGCCTGCACGCCCACAGTTAAGCTGTGGAATTTCACAGACGACGTGACAAACCACCTACGAGCTCTTTACGCC
CAGTAATTCCGGACAACGCTTGCACCCTACGTATT
>OTU_425
GGACTACTCGGGTTTCTAATCCTGTTTGCTCCCCACGCTTTCGCGCCTCAGCGTCAGTTGTCGTCCAGCAAGCCGCCTTC
GCCACTGGTGTTCCTCCTAATATCTACGCATTTCACCGCTACACTAGGAATTCCGCTTGCCTCTCCGATACTCAAGAACG
ACAGTTTCAAATGCAGTTCATGGGTTGAGCCCATGGATTTCACATCTGACTTGCCATCCCGCCTACGCGCCCTTTACACC
CAGTAAATCCGGACAACGCTTGCCACCTACGTATT
>OTU_426
GGACTACCCGGGTTTCTAATCCTGTTTGATCCCCATGCTTTCGTGCCTCAGCGTCAATCAATGCCCAGATAGCCGCCTTC
GCCTCTGGTGTTCTACCCAATATCTACGAATTTCACCTCTACACTGGGTATTCCGCTATCCTCTGCATCATTCTAGCTAA
ATAGTCATAATGGCAATTCCGAGGTTGAGCCCCGGCATTTCACCACTATCTTACTTAACCGCCTACACACCCTTTACGCC
CAGTAATTCCGAACAACGCTCGCCCCCTTCGTATT
>OTU_427
GGACTACCCGGGTTTCTAATCCTGTTCGCTCCCCACGCTTTCGCGCCTCAGCGTCAGTTACGGCCCAGCAAGTCGCCTTC
GCCACTGGTGTTCTTCCCAATCTCTACGCATTTCACCGCTACACTGGGAATTCCACTTGCCTCTTCCGCACTCAAGCCAT
GCAGTCTCCAAAGCAATTCCCACCTTAAAAGCAGGACTTTCACTCCAGACTTACACAGCCGCCTACGCGCCCTTTACGCC
CAGTCATTCCGGACAACGCTCGCCCCCTACGTATT
>OTU_428
GGACTACCCGGGTTTCTAATCCCTTTCGCTACCCTAGCTTTCGTTCCTCAGCGTCAGTTACAGCCCAGCAAGGCGCTTTC
GCCACTGGTGTTCCTCCCGATATCTACGCATTTCACCGCTACACCGGGAATTCCCCTTGCCTCTACTGCACTCTAGCCTA
CCAGTTTCCGATGCCATACCGAGGTTGAGCCTCGACCTTTAACAACGGACTTGGTAAACCGCCTACGAACTCTTTACGCC
CAATAATTCCGGACAACGCTTGCACCCTACGTATT
>OTU_429
GGACTACCAGGGTTTCTAATCCTGTTTGCTCCCCTTGCTCTCGCGCCTCAGCGTCAGGTATCAACTAGAAAATCGCTTTC
GCCACAGGTGTTCTTCCACATATCTACGCATTTCACCGCTACACGTGGAATTCCATTTTCTCCGTCAACCCTCAAGTCTA
CCAGTTTCAAATGCAGCACCAAATTTGAGCTCTGGTATTTCACATCTGACTTGATAGTCCGCCTACGCGCCCTTTACGCC
CAATAATTCCGATTAATGCTTGCACCCTCCGTATT
>OTU_430
GGACTACTGGGGTTTCTAATCCCGTTTGCTCCCCTGGCTTTCGCGCCTCAGCGTCAGGATCAGTCTAGGAAGCCGCCTTC
GCCACGGGTGTTCCTCCCGATATCTACGCATTTCACCGCTACACCGGGAATTCCACTTCCCCCTCCTATCCTCTAGCTAG
TCAGTTTCCTGGGTCCCGCCCGAATTGAATCCGGGGCTTTCACCCAAGACTTTTCTAACCGCCTACGCGCCCTTTACGCC
CAGTAATTCCGAACAACGCTCGCCCCCTTCGTCTT
>OTU_431
GGACTACTAGGGTATCTAATCCTGTTCGATACCCGCACCTTCGAGCTTAAGCGTCAGTAACACTCCCGTACGCTGCCTTC
GCAATCGGAGTTCGTCATGATATCTAAGCATTTCACCGCTACACCATGAATTCCGCATACGTTGCGTGCACTCAAGTCCG
CCAGTTCGCGCTGCAAGGTAGATGTTGAGCACCTAAATTTCACAACACGCTTAACAGACCGCCTACACTCCCTTTAAACC
CAATAAATCCGGATAACGCCTGGACCTTCCGTATT
>OTU_432
GGACTACACGGGTTTCTAATCCCGTTCGCTCCCCCAGCTTTCGCACATGAGCGTCAGTTGTCGGCCAGGAAGCCGCCTTC
GCCACTGGTGTTCCTCCCGATATCTACGCATTTCACCGCTACACCGGGAATTCCACTTCCCTCTCCGACACTCCAGTCCG
CCAGTATCGAACGCAAACCAAGGTTGAGCCCCAGTCTTTCACATCCGACTTAACGAACCGCCTGCGTGCGCTTTACGCCC
AGTAATTCCGGACAACGCTCGCCCCCTACGTATTA
>OTU_433
GGACTACTGGGGTTTCTAATCCTGTTTGCTACCCACGCTTTCGTGCATGAGCGTCAGTATCGACCCAGGGGGCTGCCTTC
GCCATTGGTGTTCCTCCACATCTCTACGCATTTCACTGCTACACGTGGAATTCCACCCCCCTCTGCCGTACTCTAGCCTT
GCAGTCACAAACGCAGTTCCCAGGTTAAGCCCGGGGATTTCACGCCTGTCTTACAAAACCGCCTGCGCACGCTTTACGCC
CAGTAATTCCGATTAACGCTCGCACCCTACGTATT
>OTU_434
GGACTACTAGGGTTTCTAATCCCGTTCGCTCCCCTGGCTTTCGCGCCTCAGCGTCAGACACAGTCCAGAAAGTCGCCTTC
GCCACTGGTGTTCCTCCCAATATCTACGCATTTCACCGCTACACTGGGAATTCCACTTTCCTCTCCTGCACTCAAGAATA
GCAGTTTCCATTGACCTTACGGGGTTGAGCCCCGCACTTTTACAACAGACTGACTATCCCGCCTACGCGCGCTTTACGCC
CAATAATTCCGGACAACGCTCGCCACCTACGTATT
>OTU_435
GGACTACCGGGGTTTCTAATCCTGTTTGCTCCCCACGCTTTCGAGCCTCAGTGTCAGTTACAGTCCAGTAAGCCGCCTTC
GCCACTGGTGTTCCTCCTAATATCTACGCATTTCACCGCTACACTAGGAATTCCACTTACCCCTCCTGCACTCTAGTCTG
ACAGTTTCAAAGGCAATCCCAAGGTTAAGCCCTGGGTTTTCACCTCTGACTTGCCATACCACCTACGCTCCCTTTACACC
CAGTAAATCCGGATAACGCTTGCCCCCTACGTATT
>OTU_436
GGACTACTGGGGTTTCTAATCCTGTTTGCTCCCCACGCTTTCGTGCATGAGCGTCAGTGTTATCCCAGGAGGCTGCCTTC
GCCATCGGTGTTCCTCCGCATATCTACGCATTTCACTGCTACACGCGGAATTCCACCTCCCTCTGACACACTCTAGCCTT
GCAGTCACAAGTGCAGTTCCCAGGTTAAGCCCGGGGATTTCACACCTGTCTTACAAAGCCGCCTGCGCACGCTTTACGCC
CAGTAATTCCGAACAACGCTTGCTGCCTACGTATT
>OTU_437
GGACTACTAGGGTTTCTAATCCTGTTTGATCCCCACGCTTTCGTGTCTCAGCGTCAGTGCCCGTCCAGTTAGCCGCTTAC
GCCACTGGTATTCCTCCGAATATCTGCGAATTTCACCTCTACACTCGGAATTCTGCTAACCTCTCCGGGACTCTAGCTTA
ACAGTTTCAAGAGCAATTCCAGGGTTGAGCCCTGGGATTTCACTCCTGACTTGTTAAACCGCCTACACACGCTTTACGCC
CAGTGATTCCGAACAACGCTTGCCCCATTCGTATT
>OTU_438
GGACTACAGGGGTTTCTAATCCTGTTTGCTCCCCACGCTTTCGAGCCTCAACGTCAGTTACTGTCCAGTAAGCCGCTTTC
GCCACTGGTGTTCCTCCTAATATCTACGCATTTCACCGCTACACTAGGAATTCCGCTTACCTCTCCAGCACTCTAGTTAA
ACAGTTTCCAAAGCAGTCCCGGGGTTGAGCCCCGGGCTTTCACTTCAGACTTGCTTTACCGTCTACGCTCCCTTTACACC
CAGTAAATCCGGATAACGCTTGCCCCCTACGTATT
>OTU_439
GGACTACTCGGGTTTCTAATCCTGTTTGATCCCCATGCTTTCGTGCCTCAGCGTCAGTTGACAGCCAGATACTCGCCTTC
GCCACTGGTGTTCTACCCAATATCTACGAATTTCACCTCTACACTGGGTATTCCAATATCCTCTCTGTCACTCCAGATCT
ATAGTTATAATGGCAATTCCTAAGTTGAGCTCAGGTATTTCACCACTATCTTACAAATCCGCCTACACACCCTTTACGCC
CAGTAATTCCGAACAACGCTTGCCCCCTTCGTATT
>OTU_440
GGACTACCGGGGTTTCTAATCCTGTTTGATCCCCACACTTTCGCACCTCAGCGTCAGTTGTCGGCCAGAAGCTTGCCTTC
GCCATCGGTGTTCTTCCTGATATCTACAGATTTTACCCCTACACCAGGAATTCCAGCTCCCTCTCCGTAACTCAAGCTAA
GCAGTTCCCAACGCATCCCTACAGTTAAGCTGCAGACTTTCACGCCAGGCTTACCAAGCCGCCTACATGCCCTTTACGCC
CAGTAATTCCGAACAACGCTCGCCCCCTACGTGTT
>OTU_441
GGACTACTCGGGTATCTAATCCTGTTTGCTCCCCACGCTTTCGTGCCTCAGTGTCAGTATCTGTCCAGGAAGTCGCCTTC
GCCACTGATGTTCCTTCCGATATCTACGCATTTCACCGCTACACCGGAAATTCCACTTCCCTCTACAGTACTCTAGTCAA
ACAGTATCAGGCGCAGTCCCCAAGTTAAGCTCGGGAATTTCACACCTAACTAATCTAACCACCTACGCACCCTTTACGCC
CAGTAATTCCGATTAACGCTCGCACCCTCTGTATT
>OTU_442
GGACTACCAGGGTTTCTAATCCTGTTTGCTCCCCACGCTTTCGTGCCTCAACGTCAGATATAGTTTGGTAAGCTGCCTTC
GCAATCGGTGTTCTGTATGATCTCTAAGCATTTCACCGCTACACCATACATTCCGCCTACCGCAACTACTCTCTAGCCCA
GCAGTATCAACGGCACGTTTGGTGTTAAGCACCAAAATTTCACCGCTGACTTACTAAACCGCCTACGCACCCTTTAAACC
CAATAAATCCGGATAACGCTTGGATCCTCCGTATT
>OTU_443
GGACTACTCGGGTTTCTAATCCTGTTTGCTCCCCACGCTTTCGTGCCTCAGTGTCAGTGTTGGCCCAGGTGGCCGCCTTC
GCCACGGGTGTTCCTCCCGATCTCTACGCATTTCACTGCTACACCGGGAATTCCGCCACCCTCTACCACACTCTAGTGAC
CCAGTATCCACTGCAATTCCCAGGTTGAGCCCAGGGCTTTCACAACGGACTTAAGCCACCACCTACGCACGCTTTACGCC
CAGTAATTCCGAGTAACGCTTGCACCCTTCGTATT
>OTU_444
GGACTACTAGGGTTTCTAATCCGGTTTGCTCCCCCAGCTTTCGTCCCTCACTGTCGGACCCGTTCTGGTGAGATGCCTTC
GCCATAGGTGGTCCCACCGGGATTACAGGATTTCACTCCTACCCCGGCAGTACCCCTCACCTCTCCCGGTCCCAAGAAAA
CAAGTTTCCCCTGAACGCCCGCAAGTTAAGCCAGCGGATTTCTCAAGGGACCCAGTTATCAAGCTACGGACCCTTTAAGC
CCAGTAATAGCGGCCACCACTCGAGCCGCCGGTAT
>OTU_445
GGACTACCAGGGTATCTAATCCTGTTTGCTCCCCACGCTTTCGCGCCTCAGCGTCAGTTACAGACCAGAGAGCCGCCTTC
GCCACTGGTGTTCCTCCACATCTCTACGCATTTCACCGCTACACGTGGAATTCCACTCTCCTCTTCTGCACTCAAGCCTC
CCAGTTTCCAATGACCGCTTGCGGTTGAGCCGCAAGATTTCACATCAGACTTAAGAAGCCGCCTGCGCGCGCTTTACGCC
CAATAATTCCGGACAACGCTTGCCACCTACGTATT
>OTU_446
GGACTACTCGGGTTTCTAATCCTGTTTGCTCCCCACGCTTTCGTGCCTCAACGTCAGTTACAGTCCAGTAAGCCGCCTTC
GCCACTGGTGTTCCTCCTAATATCTACGCATTTCACCGCTACACTAGGAATTCCACTTACCTCTCCTGCACTCTAGTTAA
ACAGTTTCAAATGCAGTCCCGGGGTTGAGCCCCGGGCTTTCACATCTGACTTGCCTAACCGTCTACGCACCCTTTACACC
CAGTAAATCCGGATAACGCTTGCCCCCTACGTATT
>OTU_447
GGACTACCGGGGTTTCTAATCCTGTTTGCTCCCCACGCTTTCGTGCATGAGCGTCAGTTAAAGTTTAGTGAGCTGCCTTC
GCGATTGGTGTTCTGTGTTATATCTAAGCATTTTACCGCTACACAACACATTCCGCCCACTTCAGCTTTACTCTAGGCAT
TCAGTATCAAGGGCAGTTCTACAGTTAAGCTGTAGGATTTCACCCCTGACTTAAATGTCCGCCTGCGCACCCTTTAAACC
CAGTGAATCCGGATAACGCTTGCATCCTCCGTATT
>OTU_448
GGACTACCGGGGTTTCTAATCCTGTTTGCTCCCCACACTTTCGAGCCTCAGCGTCAGTAAAAGCCCAGTTGGCCGCCTTC
GCCACTGGTGTTCCTCCTAATATCTACGCATTTCACCGCTACACTAGGAATTCCGCCAACCTCTACTTCACTCAAGACCT
GCAGTTTCAAGCGCAGATACCGGTTGAGCCGATATATTTCACGCCTGACTTGCCTGCCCGCCTACGCTCCCTTTACACCC
AGTAATTCCGGACAACGCTTGCCACCTACGTATTA
>OTU_449
GGACTACAGGGGTTTCTAATCCTGTTCGATACCCACGCTTTCGTGCATGAGCGTCAGTAGGGCGCCGGTATGCTGCCTTC
GCAATCGGAGTTCTGCGTGATATCTATGCATTTCACCGCTACACCACGCATTCCGCATACTTCTCGCCCACTCAAGACGG
CCAGTTTCAACGGCGGGATGGGGTTGGGCCCCACGATTTTACCGCTGACTTGACCGCCCGCCTGCGCACCCTTTAAACCC
AATGAATCCGGATAACGCTCGCATCCTCCGTATTA
>OTU_450
GGACTACCCGGGTTTCTAATCCTGTTCGCTCCCCACGCTTTCGCTCCTCAGCGTCAGTGACGGCCCAGAGACCTGCCTTC
GCCATTGGTGTTCTTCCCGATATCTACACATTCCACCGTTACACCGGGAATTCCAGTCTCCCCTACCGCACTCAAGCCCG
CCCGTACCCGGCGCGGATCCACCGTTAAGCGATGGACTTTCACACCGGACGCGACGAACCGCCTACGAGCCCTTTACGCC
CAATAATTCCGGATAACGCTTGCACCCTACGTATT
>OTU_451
GGACTACCGGGGTTTCTAATCCTGTTTGCTACCCACGCTTTCGAGCCTCAGCGTCAGTTACAGCCCAGTAGGCCGCCTTC
GCCACTGGTGTTCCTCCTAATATCTACGCATTTCACCGCTACACTAGGAATTCCGCCTACCTCTACTGCACTCAAGAGTG
GCAGTTTTGAACGCGACTATCAGTTGAGCCGATAGTTTAGACATTCAACTTGCCTCCCCGCCTACGCTCCCTTTACACCC
AGTAATTCCGGACAACGCTTGCCACCTACGTATTA
>OTU_452
GGACTACTGGGGTTTCTAATCCGGTTCGCGCCCCTGGCTTTCGTTACTCACCGTCAGGTTCGTTCCAGTTAGACGCCTTC
GCCACAGGTGGTCCTCCCAGGATTATAGGATTTCACCCCTACCCTGGGAGTTCCTCTAACCTCTCCCGACCTCAAGTCTG
ATAGTATCTCCAGCAATTCCCACAGTTAAGCTGTAGGATTTCACCAGAGACTTATCAAACCGGCTACGAACGCTTTAGGC
CCAATAAAAACGGCCACCACTTGAGCTGCCAGTGT
>OTU_453
GGACTACTCGGGTTTCTAATCCTGTTTGCTCCCCACGCTTTCGCACCTGAGCGTCAGTCTTTGTCCAGGGGGCCGCCTTC
GCCACCGGTATTCCTCCAGATCTCTACGCATTTCACCGCTACACCTGGAATTCTACCCCCCTCTACAAGACTCCAGCCTG
CCAGTTTCGAATGCAGTTCCCAGGTTGAGCCCGGGGATTTCACATCCGACTTGACAGACCGCCTGCGTGCGCTTTACGCC
CAGTAATTCCGATTAACGCTTGCACCCTCCGTATT
>OTU_454
GGACTACCAGGGTTTCTAATCCTGTTTGCTCCCCACGCTTTCGTGCATGAGCGTCAGTTGCGTCCCAGGGGGCTGCCTTC
GCCATCGGTGTTCTTCCGCATATCTACGCATTTCACTGCTACACGCGGAATTCCACCCCCCTCTGACGTACTCCAGTCGG
ACAGTCACAAATGCAGTTCCCAGGTTAAGCCCGGGGATTTCACATCTGTCTTACCCAACCGCCTGCGCACGCTTTACGCC
CAGTAATTCCGATTAACGCTTGCACCCTACGTATT
>OTU_455
GGACTACAGGGGTTTCTAATCCTGTTTGATACCCACACTTTCGAGCCTCAGCGTCAGTTGCACTCCGGACATATGCCTTC
GCGATCGGAGTTCTTCATGATATCTAAGCATTTCACCGCTACACCATGAATTCCAACATCCCTGTGTGCACTCAAGCGAC
GCAGTATCAACTGCAATTGCACGGTTAAGCCGCACGATTTCACAACTGACTTACGCCGCCGCCTGCGCTCCCTTTAAACC
CAATAAATCCGGATAACGCCTGGACCTTCCGTATT
>OTU_456
GGACTACTCGGGTTTCTAATCCTGTTTGCTCCCCACACTTTCGTGCCTCAACGTCAGTTGCTGTCCAGAAAGTCGCCTTC
GCCACTGGTGTTCCTCCTAATATCTACGCATTTCACCGCTACACTAGGAATTCCACTTTCCTCTCCAGCACTCAAGAAAA
GCAGTTTTAGTCGCAGTTCCTCAGTTGAGCCGAGGGATTTCACAACTAACTTACCTTCCCGTCTACGCACCCTTTACACC
CAATAAATCCGGATAACGCTTGCTCCCTACGTATT
>OTU_457
GGACTACTGGGGTTTCTAATCCTGTTTGCTCCCCACGCTTTCGCGCCTCAGCGTCAGTTACAGTCCAGTAAGTCGCCTTC
GCCACTGGTGTTCCTCCTAATATCTACGCATTTCACCGCTACACTAGGAATTCCACTTACCTCTCCTGCACTCAAGCTCT
CCAGTTTTAAATGCACGTCCGAAGTTAAGCCCCGGGTTTTCACATCTAACTTAAAAAGCCGCCTACGCGCCCTTTACGCC
CAGTAATTCCGGACAACGCTCGCCACCTACGTATT
>OTU_458
GGACTACTGGGGTTTCTAATCCTGTTTGCTCCCCACGCTTTCGTGCATGAGCGTCAGTATTATCCCAGGAGGCTGCCTTC
GCCATCGGTGTTCTTCCAAATATCTACGCATTTCACTGCTACACTTGGAATTCCACCTCCCTCTGACATACTCTAGTTAG
GCAGTCACAAATGCAGTTCCCAAGTTAAGCTCGGGGATTTCACATCTGTCTTACCCAACCGCCTGCGCACGCTTTACGCC
CAGTAATTCCGATTAACGCTCGCACCCTACGTATT
>OTU_459
GGACTACCCGGGTTTCTAATCCTGTTTGCTCCCCACGCTTTCGTGCATGAGCGTCAGTTTTGCCCCAGGGGGCTGCCTTC
GCCATCGGTGTTCTTCCAAATATCTACGCATTTCACTGCTACACTTGGAATTCCACCCCCCTCTGACATACTCCAGTCGG
ACAGTCACAAATGCAGTTCCCAGGTTAAGCCCGGGGATTTCACATCTGTCTTACCCAACCGCCTGCGCACGCTTTACGCC
CAGTAATTCCGATTAACGCTCGCACCCTACGTATT
>OTU_460
GGACTACCGGGGTTTCTAATCCTGTTTGCTCCCCACGCTTTCGAGCCTCAGCGTCAGTAAAGGCCCAGCAAGCCGCCTTC
GCCACTGGTGTTCCTCCTAATATCTACGCATTTCACCGCTACACTAGGAATTCCGCTTGCCTCTGCCTCACTCAAGAAAA
ACAGTTTCAAAAGCAGGTTATGGGTTAAGCCCATAATTTTCACTTCTGACTTGCCTTCCCGCCTACACTCCCTTTACACC
CAGTAATTCCGGACAACGCTCGCCACCTACGTATT
>OTU_461
GGACTACTAGGGTATCTAATCCCGTTCGCTACCCTAGCTTTCGCGTCTGAGCGTCAGGAGTGGTCCAGGAGGCCGCCTTC
GCCACTGGTGTTCCTCCGGATATCTGCGCATTTCACCACTACACCCGGAATTCCACCTCCCTCTACCATCCTCTAGCTTG
ACAGTATTGAACGACCTCTCCCAGTTGAGCCGGGAGCTTTCACGTCCAACTTATCAAACCGCCTACACGCGCTTTACGCC
CAGTAAATCCGGATAACGTTTGCCTCCTACGTATT
>OTU_462
GGACTACCGGGGTTTCTAATCCTGTTTGCTCCCCACGCTTTCGCACCTCAGCGTCAGTACCGATCCAGTGGGCCGCCTTC
GCCACCGGTGTTCTTCCTAATATCTACGAATTTCACCTCTACACTAGGAATTCCACCCACCTCTATCGGACTCGAGAATT
ACAGTATCAAAGGCAGTTCCGAGGTTGAGCCCCGGGATTTCACCCCTGACTTATAATTCCGCCTACGTGCGCTTTACGCC
CAGTGATTCCGAACAACGCTAGTCCCCTTCGTATT
>OTU_463
GGACTACTAGGGTTTCTAATCCTGTTTGCTCCCCACGCTTTCGTGCCTCAGTGTCAGTTACAGTCCAGTAAGCCGCCTTC
GCCACTGGTGTTCCTCCTAATATCTACGCATTTCACCGCTACACTAGGAATTCCGCTTACCTCTCCTGCACTCTAGCTAG
ACAGTTTCAAATGCAGTACCGGGGTTGAGCCCCGGGCTTTCACATCTGACTTGCCTTGCCACCTACGCACCCTTTACACC
CAGTAAATCCGGATAACGCTTGCCCCCTACGTATT
>OTU_464
GGACTACTCGGGTTTCTAATCCTGTTTGCTCCCCACGCTCTCGCGCCTCAGCGTCAGTATTTGTCCAGGTAGCCGCCTTC
GCCACTGGTGTTCCTTCCGATCTCTACGCATTTCACCGCTACACCGGAAATTCCACTACCCTCTACAATACTCCAGATCG
CCAGTCTTCGTTGCAGTTCCTAGGTTAAGCCCAGGGATTTCACAACAATCTTAACGAACCGCCTACGCGCCCTTTACGCC
CAGTAACTCCGATTAACGCTCGCACCCTCTGTATT
>OTU_465
GGACTACCAGGGTTTCTAATCCTATTTGCTACCCACGCTTTCGTGACTGAGCGTCAGTTACGAGCTAGTAAGCCGCCTTC
GCCACTGGTGTTCCTCCATATATCTACGCATTTCACCGCTACACATGGAATTCCGCTTACCTCTCTCGCACTCTAGTCAT
CCAGTTTCCAAAGCGAACTATGGTTGAGCCATAGCCTTTGACTTCAGACTTAAATAACCGCCTGCTCACTCTTTACGCCC
AATAATTCCGGATAACGCTTGCCACCTACGTATTA
>OTU_466
GGACTACAGGGGTTTCTAATCCTGTTTGCTACCCATGCTTTCGAGCCTCAGCGTCAGTTAGTGCCCAGTAGGCCGCCTTC
GCCACTGGTGTTCCTCCCGATATCTACGCATTCCACCGCTACACCGGGAATTCCGCCTACCTCTACACCACTCAAGACCG
GCAGTTTTGAAGGCAGTTTGTGAGTTGAGCCCACAGCTTTCACCTCCAACTTGCCGACCCGCCTGCGCTCCCTTTACACC
CAGTAATTCCGGACAACGCTTGCCACCTACGTTTT
>OTU_467
GGACTACCGGGGTTTCTAATCCTGTTTGCTCCCCACGCTTTCGCGCCTCAGCGTCAGTTACAGCCCAGAGAGTCGCCTTC
GCCACTGGTGTTCCTCCACATCTCTACGCATTTCACCGCTACACGTGGAATTCCACTCTCCTCTTCTGCACTCAAGCCGT
CCAGTTTCCAGTGCGACCCGGGGTTGAGCCCCAGGGTTAAACACCAGACTTAAACAGCCGCCTGCGCGCGCTTTACGCCC
AATAATTCCGGACAACGCTCGCCCCCTACGTATTA
>OTU_468
GGACTACTCGGGTTTCTAATCCTGTTTGCTCCCCATGCTTTCGTCCCTGAGGGTCAGTCATTGTCCAGTGATCTGCCTTC
GCTTTCGATGTTCTTCCAGATATCTACGCATTCCACCGCTACACCTGGAATTCCAATCACCTCTCCAACACTCTAGTCAA
CCAGTCTCCAACGCAGTTCCTGAGTTAAGCTCAGGGATTTCACGTCAGACTTAATCAACCCCCTGCGGACCCTTTACGCC
CAATAAATCCGAACAACGCTCGCCACCTACGTATT
>OTU_469
GGACTACCGGGGTATCTAATCCTGTTTGCTCCCCACGCTTTCGAGCCTCAACGTCAGTTACCGTCCAGTAAGCCGCCTTC
GCCACTGGTGTTCCTCCTAATATCTACGCATTTCACCGCTACACTAGGAATTCCGCTTACCTCTCCGGCACTCCAGCTTG
ACAGTTTCCAAAGCAATCCCAAGGTTGAGCCCTGGGTTTTCACTCCAGACTTGCCATGCCGTCTACGCTCCCTTTACACC
CAGTAAATCCGGATAACGCTTGCCCCCTACGTATT
>OTU_470
GGACTACTCGGGTTTCTAATCCTGTTCGATCCCCACGCTTTCGTGCCTCAGCGTCAGTCAGGCGCCAGTACGCTGCCTTC
GCAATCGGAGTTCTGCGCAATATCTAAGCATTTCACCGCTACACTGCGCATTCCGCGTACCTCTCGCCTTCTCTAGCACT
GCAGTTTCAACGGCTCGCCGGGGTTGAGCCCCGGGCTTTTACCGCTGACTTGCATCGCCGCCTACGCACCCTTTAAACCC
AATAAATCCGGATAACGCTCGCATCCTCCGTATTA
>OTU_471
GGACTACACGGGTATCTAATCCTGTTTGCTCCCCACGCTTTCGAGCCTCAGCGTCAGTTACAGTCCAGAAAGTCGCCTTC
GCCACTGGTGTTCTTCCTAATCTCTACGCATTTCACCGCTACACTAGGAATTCCACTTTCCCCTCCTGCACTCTAGATTT
CCAGTTTGGAATGCAGCACCCAGGTTGAGCCCGGGTATTTCACATCCCACTTAAAAATCCGCCTACGCTCCCTTTACGCC
CAGTAAATCCGGACAACGCTTGCCACCTACGTATT
>OTU_472
GGACTACTGGGGTTTCTAATCCCGTTTGCTCCCCTGGCTTTCGCTCCTCAGCGTCAGGGGTAGACCAGAAAGCCGCCTTC
GCCACTGGTGTTCCTCCCGATATCTACGCATTTCACCGCTACACCGGGAATTCCGCTTTCCTCTTCTACCCTCAAGTCCG
GGAGTTTCAGCTGGCCCTACCAGGTTGAGCCTGGTGATTTCACAGCTGACTTTCAGGACCGCCTACGAGCGCTTTACGCC
CAATGATTCCGGACAACGCTTGCTCCTTATGTATT
>OTU_473
GGACTACCGGGGTTTCTAATCCTGTTTGATCCCCATGCTTTCGTGCCTCAGTGTCAATATATAGCCAGATAGCCGCCTTC
GCCACTGGTGTTCTACCCAATATCTACGAATTTCACCTCTACACTGGGTATTCCGCTATCCTCTCTATAATTCTAGACGC
ATAGTTATAATGGCAATTCCGAAGTTGAGCTCCGGCATTTCACCGCTATCTTACACGTCCACCTACACACCCTTTACGCC
CAGTAATTCCGAACAACGCTCGCCCCCTTCGTATT
>OTU_474
GGACTACTGGGGTTTCTAATCCCTTTCGCTCCCCTAGCTTTCGTCCCCCAGTGTCAGTGCAGACCCAGTCAGACGCTTTC
GCCGCTGGTGTTCTTCCCGATATCTACGCATTTCACCGCTACACCGGGAATTCCTCTGACCCCTATCGCACTCTAGCTTC
ACAGTTTCCATCGCCCGTATGCGGTTGAGCCGCACGCTTTGACAACAGACTGGTCAAGCCACCTACGGACGCTTTACGCC
CAATAATTCCGGATAACGCTTGCATCCTCCGTATT
>OTU_475
GGACTACCGGGGTTTCTAATCCTGTTTGCTCCCCACGCTTTCGCACCTCAGCGTCAGTAGAGGCCCAGGGGGTCGCCTTC
GCCTCTGGTGTTCCTCCCGATATCTACGAATTTCACCTCTACACCGGGAATTCCACCCCCCTCTACCTCACTCAAGACAA
GCAGTATCAAATGCAATTCCGGAGTTGAGCTCCGGGCTTTCACACCTGACTTGCCTATCCGCCTACGTGCTCTTTACGCC
CAGTGATTCCGAATAACACTTGCACCCTCCGTATT
>OTU_476
GGACTACCGGGGTTTCTAATCCTGTTCGCTCCCTACGCTCTCGTCCCTCAGCGTCAGTAATATCTTAGTAACCTGCCTTC
GCTATTGGTGTTCTAAGTAATATCTATGCATTTCACCGCTACACTACTTATTCCAGCTACTTCAAATATACTCAAGACTA
TCAGTATCAATGGCAGTTTCATAGTTGAGCTATGAGATTTCACCACTGACTTAATAACCCGCCTACGGACCCTTTAAACC
CAATAAGTCCGGATAACGCTTGCACCCTCCGTATT
>OTU_477
GGACTACTCGGGTTTCTAATCCTGTTTGCTCCCCACGCTTTCGCACCTCAGCGTCAGTACCGGACCAGTTAGCCGCCTTC
GCCACTGGTGTTCTTCCCAATATCTACGAATTTCACCTCTACACTGGGAATTCCACTAACCTCTTCCGGACTCTAGATTG
CCAGTATCAAAGGCAGTTCCGAAGTTGAGCTCCGGGATTTCACCTCTGACTTAACAATCCGCCTACGTGCGCTTTACGCC
CAGTAATTCCGAACAACGCTAGCCCCCTTCGTATT
>OTU_478
GGACTACTAGGGTATCTAATCCTATTTGCTCCCCACGCTTTCGTGTCTCAGCGTCAGTAACAGCCCAGCAAGCCGCCTTC
GCCACTGGTGTTCCTTCTAATATCTACGCATTTAACCGCTACACTAGAAATTCCACTTGCCTCTACTGCACTCAAGTCTA
CCAGTTTCTAAGACGAACCGAGGTTAAGCCTCGGGCTTTTATCTTAGACTTAATAAACCGCCTACACACGCTTTACGCCC
AATAAATCCGGATAACGCTTGCCCCCTACGTATTA
>OTU_479
GGACTACTCGGGTTTCTAATCCTGTTTGCTCCCCACGCTTTCGAGCCTCAGCGTCAGTTACAGACCAGAGAGTCGCCTTC
GCCACTGGTGTTCCTCCATATATCTACGCATTTCACCGCTACACATGGAATTCCACTCTCCTCTTCTGCACTCAAGTTCC
CCAGTTTCCAATGACCTTCCACGGTTGAGCCGTGGGCTTTCACATCAGACTTAAGGAACCGCCTGCGCTCGCTTTACGCC
CAATAAATCCGGACAACGCTTGCCACCTACGTATT
>OTU_480
GGACTACCGGGGTTTCTAATCCTGTTTGCTCCCCACGCTTTCGCACCTCAGCGTCAACAATCGTCCAGTAAGTCGCCTTC
GCCACTGGTGTTCTTCCGAATATCTACGAATTTCACCTCTACACTCGGAATTCCACTTACCTCTCCGACGTTCAAGCGAT
GCAGTCTTAAAGGCAATTCCGGAGTTGAGCCCCGGGCTTTCACCTCTAACTTACAAAGCCGCCTACGTGCGCTTTACGCC
CAGTAATTCCGAACAACGCTAGCCCCCTCCGTATT
>OTU_481
GGACTACTAGGGTTTCTAATCCCGTTCGCTACCCTAGCTTTCGTGCCTCAGCGTCAGAGAAGACCCAGTGAGTCGCTTTC
GCCACTGGTGTTCCTTAGGATATCAACGCATTTCACCGCTCCACCCTAAGTTCCACTCACCTCTATCTTCCTCAAGCGAC
GCAGTTTTGAGCGCAGTTCCTCGGTTGAGCCGAGGGATTTCACACCCAACTTGCGCCGCCGCCTACGCACCCTTTAAGCC
CAGTGATTCCGAATAACGTTCGTACGGTTCGTCTT
>OTU_482
GGACTACTGGGGTTTCTAATCCTGTTTGCTCCCCACGCTTTCGTGCATGAGCGTCAGTTTTGACCCAGGGGGCTGCCTTC
GCCATCGGTGTTCCTCCACATATCTACGCATTTCACTGCTACACGTGGAATTCTACCCCCCTCTGCCAAACTCTAGCCTT
GCAGTCTCCATTGCCATTCCCAGGTTGAGCCCGGGGATTTCACAACAGACTTACAAAACCGCCTGCGCACGCTTTACGCC
CAGTAATTCCGATTAACGCTTGCACCCTACGTATT
>OTU_483
GGACTACCCGGGTTTCTAATCCTGTTCGATCCCCACGCTTTCGTGCCTCAGCGTCAATTGACCCCTCGCGAGATGCCTTC
GCAATCGGTGTTCTGAGTGATATCTATGCATTTCACCGCTACACCACTCATTCCTCCCGCGGCGGGATCATTCCAGCCAA
ACAGTATCAACGGCACTTCCAGGGTTGAGCCCCGGTCTTTCACCGCTGACTTACTCGGCCGCCTACGCACCCTTTAAACC
CAATGAATCCGGATAACGCTCGCATCCCCCGTATT
>OTU_484
GGACTACCCGGGTTTCTAATCCTGTTTGCTCCCCACGCTTTCGCGCCTCAGCGTCAGTTTTCGTCCAGAAAGTCGCCTTC
GCCACCGGTGTTCTTCCTAATATCTACGCATTTCACCGCTACACTAGGAATTCCACTTTCCTCTCCGATACTCCAGTCTC
CCAGTTTCCATCCCATCACGGGGTTAAGCCCCGCACTTCTAAGATGGACTTAAGTGACCGCCTGCGCGCGCTTTACGCCC
AATAATTCCGGACAACGCTTGCCACCTACGTATTA
>OTU_485
GGACTACTGGGGTATCTAATCCTGTTTGCTACCCATGCTTTCGCTCCTCAGTGTCAGTACCGGCCCAGAGTGCTGCCTTC
GCTGTCGGTGTTCTTCCTGATATCTGCGCATTTCACCGCTACACCAGGAGTTCCGCACTCCCCTACCGGACTCTAGTCAG
AGCAGTATCAAATGCAGGCTCAGGGTTGGGCCCTGAGATTTCACATCTGACTTACTCAACCACCTACGAGCCCTTTACGC
CCAGTAATTCCGGACAACGCTTGCTCCCTACGTAT
>OTU_486
GGACTACCCGGGTTTCTAATCCTGTTTGCTCCCCACACTTTCGCGCCTCAGCGTCAGTTACAGTCCAGTAAGCCGCCTTC
GCCACTGGTGTTCCTCCCGATCTCTACGCATTTCACCGCTACACCGGGAATTCCGCTTACCTCTCCTGCACTCAAGCCAT
CCAGTTTCCAAAGCAATTCCCACCTTAAAAGCAGGACTTTCACTCCAGACTTAGTTGGCCGCCTACGCGCCCTTTACGCC
CAATCATTCCGGACAACGCTTGCCCCCTACGTATT
>OTU_487
GGACTACTCGGGTTTCTAATCCTGTTTGCTCCCCACGCTTTCGAGCCTGAGCGTCAGTGTTATCCCAGGGGGCTGCCTTC
GCCATCGGTGTTCTTCCACATCTCTACGCATTTCACTGCTACACGTGGAGTTCCACCCCCCTCTGACACACTCTAGCCAT
GCAGTCACAAATGCAGTTCCAAGGTTAAGCCCTGGGATTTCACATCTGTCTTACATAACCGCCTGCGCTCGCTTTACGCC
CAGTAATTCCGATTAACGCTTGCACCCTACGTATT
>OTU_488
GGACTACTGGGGTTTCTAATCCTGTTTGCTCCCCACGCTTTCGCGCCTCAGCGTCAGTTAATGTCCAGCAGGCCGCCTTC
GCCACTGGTGTTCCTCCGTATATCTACGCATTTCACCGCTACACACGGAATTCCGCCTGCCTCTCCATCACTCAAGACAC
ACAGTTTCAAATGCAGGTTATGGGTTGAGCCCATAAATTTCACATCTGACTTGCATGCCCGCCTACTCGCCCTTTACACC
CAGTAAATCCGGATAACGCTCGCCACCTACGTATT
>OTU_489
GGACTACTAGGGTTTCTAATCCTGTTTGCTCCCCTAGCTTTCGCGCTCTGAGCGTCAGTACTGGACCAGAGAGTCGCCTT
CGCCACCGGCGTTCCTCCTGATATCTACGCATTTCACCGCTCCACCAGGAATTCCACTCCCCCCTTCCAGACTCTAGCAC
TGCAGTTTCGACTGCGATTCCCCGGTTGAGCCGGGGGCTTTCACAACCGACTTACAGCACCGCCTACGCGCGCTTTATGC
CCAGTGAATCCGAACAACGCTTGCGCCACTCGTAT
>OTU_490
GGACTACCCGGGTATCTAATCCTGTTTGCTCCCCACGCTTTCGAGCCTCAACGTCAGTTACAGTCCAGTAAGCCGCCTTC
GCCACCGGTGTTCCTCCTAATATCTACGCATTTCACCGCTACACTAGGAATTCCGCTTACCTCTCCTGCACTCTAGATGC
ACAGTTTCAAAAGCAGTCCCGGGGTTAAGCCCCGGGCTTTCACTTCTGACTTGCACTTCCGTCTACGCTCCCTTTACACC
CAGTAAATCCGGATAACGCTTGCCCCCTACGTATT
>OTU_491
GGACTACAAGGGTTTCTAATCCTGTTCGCTACCCACGCTTTCGTGCATCAGTGTCAGTGTAAGTTTAGCAGGCTGCCTTC
GCTATCGGTGTTCTATGACATATCTATGCATTTCACCGCTACATGTCATATTCCGCCTGCTTCAACTTAACTCAAGACCC
ACAGTATCAGAGGCAGTGCGACAGTTGAGCTGCCGGATTTCACCACTGACTTATGGACCCACCTACGCACCCTTTAAACC
CAATGAATCCGGATAACGCTTGCATCCTCCGTATT
>OTU_492
GGACTACACGGGTTTCTAATCCTGTTTGCTACCCATGCTTTCGAGCCTCAGCGTCAGTTGGTGCCCAGTAGGCCGCCTTC
GCCACTGGTGTTCCTCCCGATATCTACGCATTCCACCGCTACACCGGGAATTCCGCCTACCTCTGCACTACTCAAGATCG
TCAGTTTTGAAAGCAATTTATGGGTTGAGCCCATAGATTTCACTTCCAACTTGACAACCCGCCTGCGCTCCCTTTACACC
CAGTAATTCCGGACAACGCTTGCCACCTACGTTTT
>OTU_493
GGACTACCCGGGTATCTAATCCTGTTTGCTCCCCATGCTTTCGCGCCTCAGCGTCAGTCTCAGCCCAGTAAACCGTCTTC
ACCACCGGTGTTCTTCCACATATCTACGCATTTCACCGCTACACGTGGAATTCCGTTTACCCTAACTGAACTCTAGCTCA
GGAGTTTCAAATGCAGCTCCGGGGTTGAGCCCCGGAATTTCACATCCGACTTTCTAAGCCGCCTACGCGCCCTTTACGCC
CAGTAATTCCGATCAATGCTTGCACCCTCCGTATT
>OTU_494
GGACTACAAGGGTTTCTAATCCCTTTCGCTCCCCACGCTTTCGAGCATGAGCGTCAGATCCTGTCCAGTAAGCTGCCTTC
GCCTTCGGTGTTCCTTCCGATATCTGCGCATTTTACCGCTACACCGGAAATTCCGCTTACCTCTCCAAGTCTCTAGATTA
ATAGTTTTGGGCGCAATTCCGAAGTTAAGCCCCGGTATTTCACACCCAACACACCAATCCGCCTGCGCTCCCTTTACGCC
CAGTGAATCCGAGTAACGCTCGTAGTCTCCGTATT
>OTU_495
GGACTACAGGGGTTTCTAATCCCGTTTGATCCCCTAGCTGTCGCTTCTCAGCGTCAGGAATGCCCCAGGTGGCCGCCTTC
GCCACGGATGTTCCTCCAGATATCTACGCATTTCACCACTACACCTGGAATTCCACCACCCTCTAGCATCCTCAAGCCCT
GCAGTATCGAACGGCCACTCCGAGTTAAGCCCGGAGATTTCACGCCCGACTTACAGAACCGCCTACAAGCGCTTTACGCC
CAGTAAATCCGGATAACGCTCGCGACCTACGTGTT
>OTU_496
GGACTACTCGGGTATCTAATCCCGTTCGCTACCCACGCTTTCGCGCCTCAGTGTCAGTTGCGAGCCAGGGCGCCGCTTTC
GCCACTGGTATTCCTCCCGATATCTACGCATTCCACCACTACACCGGGAATTCTGCACCCCTCTCTCGCCCTCAAGCCAA
GCAGTCTTGAACGTCTCCTCCCAGTTAAGCCAAGAGATTTTACATCCAACTTACTCAACCACCTACGCGCTCTTTACGCC
CAGTAAATCCGGATAACGCTCGCCACCTACGTTTT
>OTU_497
GGACTACTAGGGTATCTAATCCTGTTTGCTCCCCACGCTTTCGTGTCTCAGCGTCAGTTGTCGTCCAGCAATCCGCCTTC
GCCACTGGTGTTCCTCCTAATATCTACGCATTTCACCGCTACACTAGGAATTCCGATTGCCTCTCCGACTCTCAAGAAAA
TCAGTTTCAAATGCAGTTCCGCAGTTAAGCCGCGGCATTTCACATCTGACTTGACTTCCCGCCTACTCACCCTTTACACC
CAGTAAATCCGGATAACGCTCGCCACCTACGTATT
>OTU_498
GGACTACAGGGGTTTCTAATCCTATTTGCTACCCACGCTTTCGTGACTGAGCGTCAGTATCGATCCAGTATATCGCCTTC
GCCACTGGTGTTCCTCCATATATCTACGCATTTCACCGCTCCACATGGAATTCCATATACCTCTCTCGTACTCTAGCCTC
TCAGTTTCCAAAGCGGACAGTGGTTGAGCCACTGCATTTGACTTCAGACTTAAAAGGCCGCCTGCTCACTCTTTACGCCC
AATAATTCCGGATAACGCTTGCCACCTACGTATTA
>OTU_499
GGACTACTGGGGTTTCTAATCCCGTTCGCTCCCCACGCTTTCGCACATGAGCGTCAGGTCAGTGCCAGGGTGTCGCCTTC
GCCTCTGGTATTCCTCCCGATATCTACGCATTCCACCACTACACCGGGAATTCTACACCCCTCTCACTGCCTCAAGCTAC
TCAGTTTCCAACGACCCCTCCCAGTTAAGCCAGGAGATTTCACGTCAGACTTAAGCAGCCGCCTGCGTGCGCTTTACGCC
CAGTAATTCCGGATAACGCTTGTCACCTACGTATT
>OTU_500
GGACTACCCGGGTATCTAATCCTGTTTGCTCCCCACGCTTTCGCTCCTCAGCGTCAGTTAATGTCCAGCAGGCCGCCTTC
GCCACTGGTGTTCCTCCGTATATCTACGCATTTCACCGCTACACACGGAATTCCGCCTGCCTCTCCATCACTCAAGACCA
GCAGTTTTGAAAGCAGTTCCGGGGTTAAGCCCCGGGATTTCACTCCCAACTTGCCAGCCCGCCTACTCGCCCTTTACACC
CAGTAAATCCGGATAACGCTTGCTCCCTACGTATT
>OTU_501
GGACTACTCGGGTTTCTAATCCTGTTTGCTCCCCACGCTTTCGAGCCTCAGCGTCAGTCATCGTCCAGTAAGCCGCCTTC
GCCACTGGTGTTCCTCCTAATATCTACGCATTTCACCGCTACACTAGGAATTCCGCTTACCTCTCCGACACTCCAGCACG
ACAGTTTCCAATGCAGTCCCATGGTTGAGCCTTGGGTTTTCACATCAGACTTATCATGCCGCCTGCGCTCCCTTTACACC
CAGTAAATCCGGATAACGCTTGCCCCCTACGTATT
>OTU_502
GGACTACCGGGGTTTCTAATCCTGTTTGCTCCCCACGCTTTCGCACCTCAGTGTCAGTATCAGTCCAGGTAGTCGCCTTC
GCCACTGGTGTTCCTTCCTATATCTACGCATTTCACCGCTACACAGGAAATTCCACTACCCTCTACCATACTCTAGCTTG
CCAGTTTTGGATGCAGTTCCCAGGTTGAGCCCGGGGATTTCACATTCAACTTAACAAACCACCTACGCGCGCTTTACGCC
CAGTAATTCCGATTAACGCTTGCACCCTCTGTATT
>OTU_503
GGACTACTGGGGTTTCTAATCCTGTTTGCTCCCCACGCTTTCGAGCCTCAGTGTCAGTTACAGGCCAGAGAGCCGCTTTC
GCCACCGGTGTTCCTCCATATATCTACGCATTTCACCGCTACACATGGAATTCCACTCTCCTCTCCTGCACTCAAGTCTA
CCAGTTTCCAATGCATACAATGGTTGAGCCACTGCCTTTTACACCAGACTTAATAAACCACCTGCGCTCGCTTTACGCCC
AATAAATCCGGACAACGCTCGGGACCTACGTATTA
>OTU_504
GGACTACAGGGGTTTCTAATCCTGTTCGCTCCCCATGCTTTCGCTCCTCAGCGTCAGTAACAGCCCAGAGACCTGCCTTC
GCCATCGGTGTTCTTCCTGATATCTGCGCATTTCACCGCTACACCAGGAGTTCCAGTCTCCCCTACTGCACTCAAGTCTG
CCCGTACCCACTGCACACCCGGGGTTAAGCCCCGGGCTTTCACAGCAGACGCGACAAACCGCCTACGAGCTCTTTACGCC
CAATAATTCCGGACAACGCTTGCGCCCTACGTATT
>OTU_505
GGACTACTCGGGTTTCTAATCCCGTTCGCTCCCCATGCTTTCGCACCCCAGCGTCGGTAGGGACCCAGAGAGCTGCCTTC
GCTTTTGGCGTTCCTTCGTAGATCTCCGGATTTCACCCCTACACACGAAATTCCACTCTCCTCTGTCTCACTCAAGTGAA
TTGGTTTCGAGAGCATTCCGCAAGTTTTTTGCGACTTTCACTTTCAACCCGATTCACCGCCTACGTGCCCTTTACGCCCA
GTCATTCCGAAGAACACTTGCCCCCCCCGTCTTAC
>OTU_506
GGACTACCAGGGTTTCTAATCCTGTTTGCTCCCCACGCTTTCGTGCATGAGCGTCAGTACAGGTCCAGGGGATTGCCTTC
GCCATCGGTGTTCCTCCGCATATCTACGCATTTCACTGCTACACGCGGAATTCCATCCCCCTCTACCGTACTCTAGCTGT
GCAGTCACAGATGCAATTCCCAGGTTGAGCCCGGGGATTTCACAACTGTCTTACACAACCGCCTGCGCACGCTTTACGCC
CAGTAATTCCGATTAACGCTCGCACCCTACGTATT
>OTU_507
GGACTACCCGGGTTTCTAATCCCGTTTACTACCCTAGCTGTCGCGTCTGAGCGTCAGAAACAGACCAGAAGATCGCCTTC
GCCACTGGTGTTCCTCCCGATATCTACGCATTTCACCACTACACCGGGAATTCCATCTTCCTCTTCTGCTCTCTAGTCTG
GTAGTATTGAACGACCTCTCCCAGTTGAGCCGGGAGCTTTCACGCCCAACTTACCAAACCGCCTGCACGCGCTTTACGCC
CAATAATTCCGAACAACGCTTGCACCCTCCGTATT
>OTU_508
GGACTACCCGGGTTTCTAATCCCGTTTGCTCCCCCAGCTTTCGCCTCTCAGCGTCAGATGCCGACCAGAAAGCCGCCTTC
GCCACTGGTGTTCCTCCCGATATCTACGCATTTCACCGCTACACCGGGAATTCCACTTTCCTCTTCGGATCTCAAGGTTG
GCAGTTTCCCGAACATTTCTGCAGTTGAGCTGCCGACTTTAGTCCGGGACATACCAATCCGCCTACAGGCGCTTAACGCC
CAGTAATTCCGGACAACGCTCGCCCCCTACGTTTT
>OTU_509
GGACTACAAGGGTTTCTAATCCTGTTTGCTACCCATGCTTTCGTGCCTCAGCGTCAGTTAAAGCCCAGTAGGCCGCCTTC
GCCACTGGTGTTCCTCCCGATCTCTACGCATTTCACCGCTACACCGGGAATTCCGCCTACCTCTACTTCACTCAAGTTCG
ACAGTTTCAAAAGCAGTTCATGGGTTAAGCCCATGGATTTCACTTCTGACTTGCCGAACCGCCTACGCACCCTTTACACC
CAGTAAATCCGAACAACGCTTGCTCCCTACGTATT
>OTU_510
GGACTACCCGGGTTTCTAATCCGGTTTGCTCCCCTAGCTTTCGAACCTCAGTGTCAGAGTCAACCCAGGAGATCGGCTTC
CCCACCGGCCTTCTTACCTATATCTGCGGATTTCACCCCTACACAGGTAATTCCATCTCCCTCTATTGCCCTCAAGCCCT
TTAGTTTCAAGCGCATTAACCTGTTAAGCTTCGTTATTTTCACACCTGACTTTAAGAGCCACCTACGTTCCCTTTACGCC
CAGTAATTCCGGGCAACGCTCGCCCCCTACGTATT
>OTU_511
GGACTACAGGGGTATCTAATCCTGTTTGCTCCCCACGCTTTCGTGCATGAGCGTCAGTGCAGGCCCAGGGGATTGCCTTC
GCCATCGGTGTTCCTCCGCATATCTACGCATTTCACTGCTACACGCGGAATTCCATCCCCCTCTGCCGCACTCCAGCCGT
GCAGTCACAAGCGCCATTCCCAGGTTGAGCCCGGGGATTTCACGCCTGTCTTACACAACCGCCTGCGCACGCTTTACGCC
CAGTAATTCCGATTAACGCTCGCACCCTACGTATT
>OTU_512
GGACTACAGGGGTATCTAATCCTGTTTGATCCCCACGCTTTCGTGCATCAGCGTCAGTAATGGCCCAGTAAGCTGCCTTC
GCAATCGGTGTTCTGTGTAATATCTAAGCATTTCACCGCTACATTACACATTCCGCCTACCTTGACCACACTCAAGACTA
ACAGTATCAACGGCAAGTCTACAGTTAAGCTGTAGGTTTTCACCACTGACTTATTAACCCGCCTACGCACCCTTTAAACC
CAATAAATCCGGATAACGCTCGCATCCTCCGTATT
>OTU_513
GGACTACACGGGTTTCTAATCTCGTTCGCTCCCCATGCTTTCGCACCCCAGCGTCGGTAAGGACCCAGAGAGTTGCCTTC
GCTTTTGGCGTTCCTTCGTAGATCTTCGGATTTCACCCCTACACAAAAAATTCCACTCTCCTCTGTCTCACTCAAGTGAA
TGGGTTTCGAGAGCATTCCACCAGTTCTTGGCGACTTTCACTCTCAACCTGATGAACCGCCTACGTGCCCTTTACGCCCA
GTCATTCCGAAGAACACTTGCCCCCCCCCATCTTA
>OTU_514
GGACTACACGGGTTTCTAATCCCGTTCGCTACCCTAGCTTTCGTTCCTCAGCGTCAGAAAAGGTCCAGTATGCCGCTTTC
GCCACCGGTGTTCCAGATGATATCAACGCATTTCACCGCTCCACCATCTGTTCCGCATACCCCTACCTCCCTCAAGCCTT
GCGGTTTGAAGCGCAGTTCCTCGGTTAAGCCGAGGGCTTTCACACCTCACCTACAAGACCGCCTACGAACTCTTTAAGCC
CAGTAATACCGAATAACGTTTGGAGAGCTCGTCTT
>OTU_515
GGACTACACGGGTTTCTAATCCTGTTTGCTCCCCACGCTTTCGTACCTCAGTGTCAGTTACAGTCCAGAAAGCCGCCTTC
GCCACTGGTGTTCCTCCTAATATCTACGCATTTCACCGCTACACTAGGAATTCCGCTTTCCTCTCCTGCACTCAAGTCTT
CCAGTTCACAAGGCGAACAATGGTTAAGCCATTGCCTTAAACCCCGTGCTTAGAAAACCACCTACGTACTCTTTACGCCC
AATAATTCCGGATAACGCTTGCCCCCTACGTATTA
>OTU_516
GGACTACTCGGGTATCTAATCCTGTTTGCTCCCCACGCTTTCGTGCCTCAGTGTCAGTTTCAGTCCAGTAAGCCGCCTTC
GCCACTGATGTTCCTCCTAATATCTACGCATTTCACCGCTACACTAGGAATTCCGCTTACCTCTCCTGCACTCTAGCCTG
ACAGTTTCAAAAGCAGTCCCGGAGTTAAGCCCCGGGCTTTCACTTCTGACTTGCCTGGCCACCTACGCACCCTTTACACC
CAGTAATTCCGGATAACGCTTGCCCCCTACGTATT
>OTU_517
GGACTACTAGGGTTTCTAATCCTGTTTGCTCCCCACGCTTTCGAGCCTCAGCGTCAGTAAAAGCCCAGTAAGCCGCCTTC
GCCACCGGTGTTCCTCCTGATATCTACGCATTTCACCGCTACACCAGGAATTCCGCTTACCTCTACTTCACTCAAGAACT
ACAGTTTCAAATGCAGCCCATGGGTTGAGCCCATGTATTTCACATCTGACTTGCAATCCCGCCTACGCTCCCTTTACACC
CAGTAATTCCGGACAACGCTCGCTCCCTACGTATT
>OTU_518
GGACTACCCGGGTATCTAATCCTGTTTGCTACCCACACTTTCGTGCCTCAGCGTCAGTTAAAGCCCAGTAGGCCGCCTTC
GCCACTGGTGTTCCTCCCGATCTCTACGCATTTCACCGCTACACCGGGAATTCCGCCTACCTCTACTTCACTCAAGACTA
ACAGTTTCAAAAGCAGTTCATGGGTTAAGCCCATGGATTTCACTTCTGACTTGCCAATCCGCCTACGCACCCTTTACACC
CAGTAAATCCGGACAACGCTTGCTCCCTACGTATT
>OTU_519
GGACTACTCGGGTTTCTAATCCTGTTTGCTCCCCACGCTTTCGCACCTCAGCGTCAGTATCGAACCAGGGGGCCGCCTTC
GCCACCGGTGTTCCTCCAGATCTCTACGCATTTCACCGCTACACCTGGAATTCCACCCCCCTCTTTCGTACTCTAGCTCA
GCAGTATCGAATGCCGTTCCCAGGTTGAGCCCGGGGCTTTCACATCCGACTTACCAAGCCACCTACGTGCGCTTTACGCC
CAGTAATTCCGATTAACGCTCGCACCTTCCGTATT
>OTU_520
GGACTACCCGGGTTTCTAATCCTGTTTGCTCCCCACGCTTTCGCGCCTCAGCGTCAGTTGTCGTCCAGCAGGCCGCCTTC
GCCACTGGTGTTCTTCCTAATATCTACGCATTTCACCGCTACACTAGGAATTCCGCCTGCCTCTCCGATACTCAAGGGCT
GCAGTTTCAAATGCAGTTTGAGGGTTGAGCCCCCAGATTTCACATCTGACTTGCAGCTCCGCCTACACGCCCTTTACACC
CAGTAAATCCGGACAACGCTTGCCACCTACGTATT
>OTU_521
GGACTACTAGGGTTTCTAATCCTGTTTGCTCCCCACGCTTTCGAGCCTCAGCGTCAGTTACCGTCCAGTAAGCCGCCTTC
GCCACTGGTGTTCCTCCTAATATCTACGCATTTCACCGCTACACTAGGAATTCCACTTACCTCTCCGGCACTCTAGTCCG
ACAGTTTCAAATGCAGTCCCGGGGTTGAGCCCCGGGTTTTCACATCTGACTTGCCGTACCGCCTGCGCTCCCTTTACACC
CAGTAAATCCGGATAACGCTTGCCCCCTACGTATT
>OTU_522
GGACTACAGGGGTTTCTAATCCTGTTTGCTACCCACACTTTCGTGCCTCAGCGTCAGTAAAAGCCCAGCAAGCCGCCTTC
GCCACCGGTGTTCCTCCTGATATCTACGCATTTCACCGCTACACCAGGAATTCCGCTTGCCTCTACTCCACTCAAGAACA
TAAGTTTCAAATGCAGTTTAAGGGTTAAGCCCTTAGATTTCACATCTGACTTTACATCCCGCCTACGCACCCTTTACACC
CAATAATTCCGGATAACGCTCGCCACCTACGTATT
>OTU_523
GGACTACCCGGGTATCTAATCCTGTTTGATACCCGCACCTTCGAGCTTCAGCGTCAGTTGTGCTCCCGTAAGCTGCCTTC
GCAATCGGAGTTCTTCGTCATATCTAAGCATTTCACCGCTACACGACGAATTCCGCCTACGTTGTGCATACTCAAGTGAA
CCAGTTCGCGCTGCAATTCAGACGTTGAGCGTCTACATTTCACAACACGCTTAATCCACGGCCTACGCTCCCTTTAAACC
CAATAAATCCGGATAACGCCTGGACCTTCCGTATT
>OTU_524
GGACTACAGGGGTTTCTAATCCTGTTCGCTCCCCATGCTTTCGCTCCTCAGCGTCAGTAACGGCCCAGAGATCTGCCTTC
GCCATCGGTGTTCCTCCTGATATCTGCGCATTCCACCGCTACACCAGGAATTCCAATCTCCCCTACCGCACTCTAGCCTG
CCCGTACCCACTGCAGACCCGAGGTTGAGCCTCGGGCTTTCACAGCAGACGCGACAAACCGCCTACGAGCTCTTTACGCC
CAATAAATCCGGACAACGCTTGCACCCTACGTATT
>OTU_525
GGACTACAAGGGTTTCTAATCCTGTTTGCTCCCCACGCTTTCGCGCCTCAGCGTCAGAACCGGTCCAGATGGCCGCCTTC
GCCACCGGTGTTCTTCCCAATATCTACGAATTTCACCTCTACACTGGGAATTCCGCCATCCTCTCCCGGCCTCAAGCACG
ACAGTATCAAGCGCAATTCCCGGGTTGAGCCCGGGGCTTTCACGCCTGACTTGTCGCGCCGCCTACGCGCCCTTTACGCC
CAGTGATTCCGAACAACGCTAGCCCCCTTCGTATT
>OTU_526
GGACTACCGGGGTTTCTAATCCTGTTTGCTCCCCACGCTTTCGTGCCTCAGTGTCAGTGCTGGTCCAGGTAGTCGCCTTC
GCCACAGATGTTCCTCCCGATCTCTACGCATTTCACTGCTACACCGGGAATTCCACTACCCTCTACCGCACTCTAGCCTG
CCAGTATCCAATGCAATTCCCAGGTTGAGCCCAGGGCTTTCACATCAGACTTAACAAACCACCTACGCACGCTTTACGCC
CAGTAATTCCGAGTAACGCTTGCACCCTTCGTATT
>OTU_527
GGACTACTAGGGTTTCTAATCCTGTTTGCTCCCCACGCTTTCATGCCTCAGTGTCAGTTACAGTCCAGAAAGCCGCCTTC
GCCACTGGTGTTCTTCCTAATCTCTACGCATTTCACCGCTACACTAGGAATTCCGCTTTCCTCTCCTGCACTCTAGAATT
CCAGTTTGGAATGCAGTTCCCAGGTTGAGCCCGGGTATTTCACATCCCACTTAAAATTCCACCTACGCATCCTTTACGCC
CAGTAAATCCGGATAACGCTCGCCACCTACGTATT
>OTU_528
GGACTACTGGGGTTTCTAATCCTGTTTGATACCCACGCTTTCGTGCATCAGTGTCAGTTGCATCCCAGTAAGCTGCCTTC
GCAATCGGAGTTCTGTGTTATATCTAAGCATTTCACCGCTACACAACACATTCCGCCTACCTCATTTGCACTCAAGACCG
ACAGTTTCAACGGCAATTTTACAGTTAAGCTGCAAACTTTCACCGCTGACTTATCAATCCACCTACGCACCCTTTAAACC
CAATAAATCCGGATAACGCTCGGATCCTCCGTATT
>OTU_529
GGACTACCCGGGTTTCTAATCCTGTTTGCTACCCACACTTTCGAGCCTCAGCGTCAGTTGGTGCCCAGTAGGCCGCCTTC
GCCACTGGTGTTCCTCCCGATATCTACGCATTCCACCGCTACACCGGGAATTCCGCCTACCTCTGCACTACTCAAGACGA
CCAGTTTTGAAAGCAGTTCATGGGTTGAGCCCATGGATTTCACTTCCAACTTGATCGCCCGCCTGCGCTCCCTTTACACC
CAGTAATTCCGGACAACGCTTGTGACCTACGTTTT
>OTU_530
GGACTACTAGGGTTTCTAATCCTGTTTGCTACCCACGCTTTCGCTCCTCAGCGTCAGTACCGGCCCAGAGTGGCGCCTTC
GCCACCGGTGTTCCTCCTGATATCTGCGCATTTCACCGCTACACCAGGAATTCCCCACTCCCCTACCGGACTCAAGTCAC
AGCAGTATCGGATGCATGCTTCGAGTTAAGCCCGAAGTTTTCACACCCGACTGACTGAACCGCCTACGAGCTCTTTACGC
CCAATAAATCCGGACAACGCTTGGTCCCTACGTGT
>OTU_531
GGACTACCGGGGTTTCTAATCCCGTTCGCTCCCCAAGCTTTCGTCTTTGACCGTCAAGTTTATTGTAGTTAGCTGTTTTC
ACTTTCGGCGTTCTTTCCGATATCAACGCATTTCACCGCTCCACCGGAAATTCCACTAACCCCCAATAACTTCCAGATAT
GCAGTATCTATCCCCTTTCTCCGATTGAGTCGGAGTATTTGAAAACAGACTTACACATCAGGCTACAGACTCTTTACGCC
CAGTAAATCCGGATAACGCTTGGGACCTATGTATT
>OTU_532
GGACTACCGGGGTTTCTAATCCTGTTTGCTCCCCACGCTTTCGAGCCTCAGCGTCATTCACCGTCCAGTAAGCCGCCTTC
GCCACTGGTGTTCCTTCTAATATCTACGCATTTCACCGCTACACTAGGAATTCCGCTTACCTCTCCGGCAATCTAGCCTT
ACAGTTTCAAAAGCAGTCCCGGGGTTGAGCCCCGGGCTTTCACTTCTGACTTGCATGGCCGCCTACGCTCCCTTTACACC
CAGTAAATCCGGATAACGCTTGCCCCCTACGTATT
>OTU_533
GGACTACTCGGGTTTCTAATCCTGTTCGCTACCCACGCTCTCGTGCTTCAGCGTCAGTAACAGTCTGGTAAGCTGCCTTC
GCTATCGGAGTTCTAAGTTATATCTAAGCATTTCACCGCTACTTAACTTATTCCGCCTACCTCGTCTGTACTCCAGTCAA
CCAGTATTAATGGCAGGCCAAGGTTTAGCCATGACATTTTACCACTAACTTAATCAACCGCCTACGCACCCTTTAAACCC
AATAAATCCGGATAACGCTCGCATCCTCCGTATTA
>OTU_534
GGACTACAGGGGTTTCTAATCCTGTTTGATACCCACACTTTCGAGCATGAACGTCAGTTACAGTTTAGCAAGCTGCCTTC
GCAATCGGGGTTCTTCGTGATATCTAAGCATTTCACCGCTACACCACGAATTCCGCCTGCCTCAACTGCACTCAAGGAAA
CCAGTATCAACTGCAATTTTACGGTTGAGCCGCAAACTTTCACAACTGACTTAATCTCCCGTCTGCGCTCCCTTTAAACC
CAATAAATCCGGATAACGCTCGCATCCTCCGTATT
>OTU_535
GGACTACTGGGGTTTCTAATCCTGTTTGCTACCCATGCTTTCGTGCTTCAGCGTCAGTTAAAGCCCAGTAGGCCGCCTTC
GCCACTGGTGTTCCTCCCGATCTCTACGCATTTCACCGCTACACCGGGAATTCCGCCTACCTCTACTTCACTCAAGCAAG
ACAGTTTCAAGCGCAGTTTATGGGTTAAGCCCATAGATTTCACGCCTGACTTGCCTCGCCGCCTACGCACCCTTTACACC
CAGTAAATCCGGACAACGCTCGCTCCCTACGTATT
>OTU_536
GGACTACTGGGGTTTCTAATCCCGTTTGCTCCCCTAGCTTTCGTGCCTCAGCGTCAGGAGTAGTCTAGAGAACCGCTTTC
GCCTCAGGTGTTCCTCCCGATATCTACGCATTTCACCGCTCCACCGGGAATTCCGTTCTCTTCGGTTATCCTCAAGCCGA
GTAGTTTCAAGGACCGTTCCGCAGTTGAGCCACGGGATTTCATCCTTGACTTTCCCAGCCGCCTACGCACCCTTTACGCC
CAGTAATTCCGAGTAACGTTTGCCCCCTACGTATT
>OTU_537
GGACTACTGGGGTTTCTAATCCTGTTTGCTCCCCACGCTTTCGAGCCTCAGTGTCAGTTACAGTCCAGTAAGCCGCCTTC
GCCTCTGGTGTTCTTCCTAATATCTACGCATTCCACCGCTACACTAGGAATTCCGCTTACCTCTCCTGCACTCAAGCTTA
ACAGTTTTATATGCAGTTCCGCAGTTAAGCCACGGGCTTTCACATATAACTTATTATGCCACCTACACTCCCTTTACGCC
CAGTCATTCCGGACAACGCTTGCCCCCTACGTATT
>OTU_538
GGACTACCGGGGTTTCTAATCCTGTTCGCTCCCCACGCTTTCGTCCATCAGCGTCAGTTGTTGCTTAGTAACCTGCCTTC
GCAATGGGTGTTCTAAGTAATATCTATGCATTTCACCGCTACACTACTTATTCCAGCTACTTCAACAACACTCAAGACAT
GCAGTATCAATGGCAGTTTCACAGTTAAGCTGTGAGATTTCACCACTGACTTACACATCAGCCTACGGACCCTTTAAACC
CAATAAATCCGGATAACGCTTGCACCCTCCGTATT
>OTU_539
GGACTACCCGGGTTTCTAATCCTATTTGCTCCCCACGCTTTCGTGCATGAGCGTCAGTGATGGCCCAGCAAATCGCCTTT
GCCACTGGTGTTCCTTCTAATATCTACGCATTTTACCGCTACACTAGAAATTCCATTTGCCTCTACCATACTCTAGCCTG
CCAGTTTCTAAAACGAACCGAAGTTGAGCTTCGGGCTTTAATTTTAGACTTAACAAACCGCCTGCGCACGCTTTACGCCC
AATAAATCCGGATAACGCTCGCCACCTACGTATTA
>OTU_540
GGACTACTGGGGTTTCTAATCCTGTTTGATCCCCACACTTTCGTGCCTCAGCGTCAATCTTGGCTTTGTGAGCTGCCTTC
GCAATTGATATTCTGTGTGATATCTAAGCATTTCACCGCTACACCACACATTCCACCCACAGCAACCAAATCCTAGCCAT
GCAGTATCAACGGCACTGTTACAGTTAAGCTGCAAAATTTCACCGCTGACTTACTCGGCCGCCTACGCACCCTTTAAACC
CAATAAATCCGGATAACGCTCGCATCCTCCGTATT
>OTU_541
GGACTACTAGGGTTTCTAATCCCGTTTGCTCCCCACGCTTTCGCACATGAGCGTCAGGTCAGTGCCAGGGCGCCGCTTCC
GCCACTGGTATTCCTCCCGATATCTACGCATTCCACCACTACACCGGGAATTCTGCACCCCTCTCACCACCTCAAGCCGC
CCAGTTTCCAACGACCCCTCCCAGTTAAGCCAGGAGATTTCACGTCAGACTTAAGCAGCCGCCTGCGTGCGCTTTACGCC
CAGTAATTCCGGATAACGCTTGTCACCTACGTATT
>OTU_542
GGACTACCAGGGTTTCTAATCCTGTTCGCTACCCACGCTTTCGTGCCTTAGCGTCAGTTGCAGTCCAGAGAGTCGCCTTC
GCCACTGGTATTCCTCCTAATATCTACGCATTTCACCGCTACACTAGGAATTCCACTCTCCTCTCCTGCACTCAAGCCCT
ATAGTTTCAAAGGCATGCTACGGTTAAGCCGTAGCCTTTAACCTCTGACCCATAAGGCAGCCTACGCACCCTTTACGCCC
AATAATTCCGGATAACGCTTGCCCCCTACGTATTA
>OTU_543
GGACTACCGGGGTTTCTAATCCTGTTCGCTCCCCATGCTTTCGCTTCTCAGCGTCAGTTACAGCCCAGAGACCTGCCTTC
GCCATCGGTGTTCCTCCTGATATCTGCGCATTCCACCGCTACACCAGGAATTCCAGTCTCCCCTACTGCACTCTAGTTAG
CCCGTACCCACTGCAAAACCAGGGTTAAGCCCCAGCCTTTCACAGCAGACGCGACCAACCGCCTACAAGCTCTTTACGCC
CAATAATTCCGGACAACGCTCGCGCCCTACGTATT
>OTU_544
GGACTACCGGGGTTTCTAATCCTGTTTGCTCCCCACGCTTTCGTGCCTCAGCGTCAGTTACAGTCCAGAGAGCCGCCTTC
GCAACTGGTATTCCTCCTAATATCTACGCATTTCACCGCTACACTAGGAATTCTACTCTCCTCTCCTGCACTCAAGTCTT
ACAGTTTCAAGAGCTTACTACGGTTGAGCCGTAGCCTTTCACTCCTGACTTGAAAGACCGCCTACGCACCCTTTACGCCC
AGTAATTCCGGATAACGCTAGCCCCCTACGTATTA
>OTU_545
GGACTACCCGGGTTTCTAATCCTGTTCGCTCCCCATGCTTTCGCTCCTCAGCGTCAGTTAATGCCCAGAGACCTGCCTTC
GCCATCGGTGTTCCTCCTGATATCTGCGCATTTCACCGCTACACCAGGAATTCCAGTCTCCCCTACATCACTCAAGTCTG
CCCGTACCCACCGCAGATCCGGGGTTAAGCCCCGGACTTTCACGGCAGACGCGACAAACCGCCTACGAGCTCTTTACGCC
CAATAATTCCGGATAACGCTTGCGCCCTACGTATT
>OTU_546
GGACTACACGGGTATCTAATCCTGTTTGCTCCCCCAGCTTTCGTGATTCAGCGTCGATAAATGCCCAGATGACTGCCTTC
GCTATAGGTGTTCTTCTCGATATCTATACATTCCACCGCTACACCGAGAATTCCATCATCCCCTACAATATCCAAGAACC
ACAGTATCCGAGGCGTCTCCGAAGTTGAGCTTCGATATTTCACCTTAGACTTATAGTTCCGCCTACTCACCCTTTACGCC
CAGTAAATCCGAGCAACGTTTGCCTCCTACGTATT
>OTU_547
GGACTACCGGGGTTTCTAATCCTGTTTGCTCCCCACGCTTTCGAGCCTCAACGTCAGTCATCGTCCAGCAGGCCGCCTTC
GCCACTGGTGTTCCTCCTAATATCTACGCATTTCACCGCTACACTAGGAATTCCGCCTGCCTCTCCGACACTCCAGCCAC
GCAGTTCCAAATGCAGTCCCGGGGTTGAGCCCCGGGCTTTCACATCTGGCTTGCATCGCCGTCTACGCTCCCTTTACACC
CAGTAAATCCGGATAACGCTTGCCCCCTACGTATT
>OTU_548
GGACTACCGGGGTTTCTAATCCTGTTTGCTCCCCACACTTTCGAGCCTCAGCGCCAGTAAAAGCCCAGCAGGCCGCCTTC
GCCACTGGTGTTCCTCCTAATATCTACGCATTTCACCGCTACACTAGGAATTCCGCCTGCCTCTACTTCACTCAAGAGAA
ACAGTTTTGAATGCAGTCTATCAGTTGAGCCGATAGTTTTCACATCCAACTTGCCTCCCCGCCTACGCTCCCTTTACACC
CAGTAATTCCGGACAACGCTCGCTCCCTACGTATT
>OTU_549
GGACTACAAGGGTTTCTAATCCCGTTCGCTCCCCATGCTTTCGCGTCTGAGCGTCAGGCCAGGCCCAGTGTGTCGCCTTC
GCCACTGGTGTTCCTCCGGATCTCTACGCATTTCACCACTACACCCGGAATTCCACACACCTCTACCTGCCTCCAGCAAA
ACAGTCTTAACTGTCCTCGCCCGGTTGAGCCGGGCGCTTTCACAGTTAACTTGTCCCACCGCCTGCACGCGCTTTACACC
CAGTAAATCCGGATAACGCTCGCCTCCTACGTTTT
>OTU_550
GGACTACTGGGGTTTCTAATCCTGTTTGCTACCCACGCTTTCGTGACTCAGCGTCAGTTACAGTCCAGTAAGCCGCCTTC
GCCACCGGTGTTCCTCCTAATATCTACGCATTTCACCGCTACACTAGGAATTCCGCTTACCTCTCCTGCACTCAAGTCAT
ACAGTTTCAAGTGCTTACTATGGTTAAGCCATAGCTTTTTACACCTGACATATATAACCGCCTACTCACCCTTTACGCCC
AGTAAATCCGGACAACGCTCGCCCCCTACGTATTA
>OTU_551
GGACTACACGGGTTTCTAATCCTGTTCGCTCCCCATGCTTTCGCTCCTCAGCGTCAGTAACAGCCCAGAGACCTGCCTTC
GCCATCGGTGTTCTTCCTGATATCTGCGCATTTCACCGCTACACCAGGAATTCCAGTCTCCCCTACTGCACTCTAGTCTG
CCCGTACCCACTGCACACCCGGAGTTAAGCCCCGGGATTTCACAGCAGACGCGGCAAACCGCCTGCGAGCCCTTTACGCC
CAATAATTCCGGATAACGCTCGCGCCCTACGTATT
>OTU_552
GGACTACCGGGGTTTCTAATCCTGTTTGCTCCCCACGCTTTCGTCCTTCAGAGTCAGTTGCTGTCCAGTAAGCTGCCTTC
GCTTTCGGTGTTCTTCCAGATATCTACGCATTCCACCGCTACACCTGGAATTCCGCTTACCTCTCCAGCACTCCAGTCCA
TCAGTCTTCAGGGCAGTTCGGGAGTTGAGCTCCCGGATTTCACCCCGAATTTAACAAACCTCCTACGGACCCTTTACGCC
CAATAAATCCGAACAACGCTCGCCACCTACGTATT
>OTU_553
GGACTACAGGGGTTTCTAATCCTGTTCGCTCCCCGCACTTTCGCACCTCAGCGTCAATCATCTGCTAGAAACCCGCCTTC
GCCACCGGTATTCTTCCAGATATCTACAGATTCCACCCCTACACCTGGAATTCTAGTTTCCCCTCAGTGATTCAAGTTCG
GCAGTACCCAATGCAATTCTACAGTTAAGCTGCAGGATTTCACATCAGGCTTACCAAACCGCCTACATGCCCTTTACGCC
CAATAATTCCGAACAACGCTTGCCCCCTACGTGTT
>OTU_554
GGACTACCGGGGTATCTAATCCTGTTTGCTCCCCTAGCTTTCGTGCCTCAGCGTCAGGAATTGTCCAGGGACTCGCCTTC
GCCACGGGTGTTCCTCTCGATATCTACGCATTTCACTGCTACACCGAGAATTCCAGTCCCCCCTCCAATCCTCAAGCCGA
ATAGTTTCCAACGCCGTTCCGGAGTTGAGCTCCGGCATTTCACGTCAGACTTACCCGACCGCCTACGCACCCTTTACGCC
CAGTGAATTCGAACAACGCTTGGGACCTCTGTATT
>OTU_555
GGACTACCGGGGTTTCTAATCCTGTTTGCTACCCACGCTTTCGCGCTTTAGCGTCAGTATCTGTCCAGTGGGCTGGCTTC
CCCATCGGCATTCCTACAAATATCTACGAATTTCACCTCTACACTTGTAGTTCCGCCCACCTCTCCAGTACTCTAGTTTG
ACAGTTTCCAACGCAATACGGAGTTGAGCCCCGCATTTTCACATCAGACTTACCAAACCGCCTAGACGCGCTTTACGCCC
AATAAATCCGGATAACGCTTGCGACATACGTATTA
>OTU_556
GGACTACTCGGGTATCTAATCCTGTTTGCTCCCCACACTTTCGTGCCTCAACGTCAGTTATTGTCCAGAAAGTCGCCTTC
GCCACCGGTGTTCCTCCTAATATCTACGCATTTCACCGCTACACTAGGAATTCCACTTTCCTCTCCAACACTCAAGAAAA
GTAGTTTTAGTTGCAGTTCCTCAGTTAAGCCGAGGGATTTCACAACTAACTTGCTTTCCCGTCTACGCACCCTTTACACC
CAATAAATCCGGATAACGCTTGCTCCCTACGTATT
>OTU_557
GGACTACCCGGGTATCTAATCCTGTTTGCTCCCCACGCTTTCGTGCCTCAGTGTCAGTAACAGTCCAGTAAGTCGCCTTC
GCCACTGGTGTTCCTCCTAATATCTACGCATTTCACCGCTACACTAGGAATTCCACTTACCTCTCCTGCACTCAAGTCCG
TCAGTTTCAAAAGCTTACAGCGGTTAAGCCGCTGCCTTTCACTTCTGACTTGATGGACCACCTACGCACCCTTTACGCCC
AGTGATTCCGGATAACGCTTGCCCCCTACGTATTA
>OTU_558
GGACTACTCGGGTTTCTAATCCCGTTCGCTCCCCACGCTTTCGCACCTGAGCGTCAGGCCAAGGCCAGGGTGCCGCTTTC
GCCACTGGTATTCCTCCCGATCTCTACGCATTCCACCACTACACCGGGAATTCTACACCCCTCTCCTCGCCTCAAGCCTG
CCAGTCTCCAACGACCTCTCCCAGTTAAGCCAGGAGCTTTCACGTCAGTCTTAACAGGCCACCTGCGTGCGCTTTACGCC
CAGTAATTCCGGATAACGCTTGCCACCTACGTATT
>OTU_559
GGACTACCAGGGTTTCTAATCCTGTTTGATCCCCACGCTTTCGTGCTTGAGCGTCTGTATTAAGTTCGTAATCTGTCTTC
ACGATCGGCGTTCTGTGACATATCTAAGCATTTCACCGCTACACATCACATTCCAATTACGTCTCTTAAACTCTAGCCCA
GCAGTATCATAGGCACGCTTACAGTTAAGCTGTAAAATTTCACCCATGACTTACCAGACCGCCTGCGCACCCTTTAAACC
CAATAAATCCGGATAACGCTTGCATCCTCCGTATT
>OTU_560
GGACTACCGGGGTTTCTAATCCTGTTCGCTCCCCACGCTTTCGTGCCTCAGCGTCAATATTAGTTTAGTAAGCTGCCTTC
GCAATCGGTGTTCTGTGTAATATCTAAGCATTTCACCGCTACACTACACATTCCGCCTACCTCAACTATATTCAAGAAAC
CCAGTATCAATGGCAGTTCTACGGTTAAGCCGCAGGATTTCACCACTGACTTAGGCTTCCGCCTACGCACCCTTTAAACC
CAATGAATCCGGATAACGCTTGCATCCTCCGTATT
>OTU_561
GGACTACCAGGGTTTCTAATCCTATTTGCTCCCCACGCTTTCGTGACTGAGCGTCAGTTACGGACTGGTAAGCCGCCTTC
GCCTCTGGTGTTCTTCCATATATCTAAGCATTCCACCGCTACATATGGAGTTCCACTTACCTCTCCCGCACTCTAGTTAA
ATAGTTTCTATAGCGAACAACAGTTGAGCTGTTGCATTTAACCATAGACTTATCTAACCGCCTGCTCACTCTTTACGCCC
AGTAATTCCGGATAACGCTTGCCACCTACGTATTA
>OTU_562
GGACTACACGGGTTTCTAATCCTGTTTGCTCCCCACGCTTTCGCGCCTCAGCGTCAGTTATGGCCCAGATCGTCGCCTTC
GCCACTGGTGTTCCTCCTAATATCTACGCATTTCACCGCTACACTAGGAATTCCACGATCCTCTACCACACTCAAGCCAC
ACAGTTTCCTATGCACTCCCCAAGTTAAGCCCGGGACTTTCACATAAGACTTGCATAGCCGCCTACGCGCCCTTTACGCC
CAGTAATTCCGGACAACGCTCGCTCCCTACGTATT
>OTU_563
GGACTACAAGGGTTTCTAATCCTGTTTGCTCCCCACGCTTTCGTGCCTCAACGTCAGATATAGTTTGGTAAGCTGCCTTC
GCAATCGGTGTTCTGTATGATCTCTAAGCATTTCACCGCTACACCATACATTCCGCCTACCGCAACTACTCTCTAGTCCA
ACAGTATTAGAGGCAGTTTCAGGGTTGAGCCCTAACATTTCACCTCTAACTTATCAAACCGCCTACGCACCCTTTAAACC
CAATAAATCCGGATAACGCTTGAATCCTCCGTATT
>OTU_564
GGACTACTGGGGTATCTAATCCTATTTGCTCCCCACGCTTTCGTGCATGAGCGTCAGTCTTTGGCTAGCAAGCCGCCTTC
GCCACTGGTGTTCCTCCATATATCTACGCATTTTACCGCTACACATGGAATTCCACTTGCCTCTCCAATACTCTAGCCTG
CCAGTTTAAGTGGCTGGATTGGGTTGAGCCCAACAATTTAACCACTTACTTAACAGGCCGCCTACGCACCCTTTACGCCC
AATAATTCCGGATAACGCTCGCCACCTACGTATTA
>OTU_565
GGACTACTGGGGTTTCTAATCCTGTTTGCTCCCCACGCTTTCGCGCCTCAACGTCAGTTACAGTCCAGAAAGCCGCCTTC
GCCACTGGTGTTCCTCCTAATATCTACGCATTTCACCGCTACACTAGGAATTCCGCTTCCCTCTCCTGCACTCAAGCCAT
GCAGTATTACAGGCAGTTCCAACCTTGAAAGTTGGGCTTTCACCTATAACTTACACAGCCGTCTACGCGCCCTTTACGCC
CAATAATTCCGGACAACGCTCGCCCCCTACGTATT
>OTU_566
GGACTACTAGGGTTTCTAATCCTGTTCGCTCCCCCAGCTTTCGCGCCTCAGCGTCAGTTACAGTCCAGAAAGCCGCCTTC
GCCACCGGTATTCCTCCCAATATCTACGCATTTCACCGCTACACTGGGAATTCTACTTTCCTCTCCTGCACTCTAGTCCG
CCAGTTTTGGACGTCGCCCCCCAGTTGAGCCGGGGTATTTCACGTCCAACTTAACGATCCGCCTACGCGCCCTTTACGCC
CAGTAATTCCGGACAACGCTCGCCACCTACGTATT
>OTU_567
GGACTACTGGGGTTTCTAATCCCGTTTGCTCCCCTAGCTTTCGTGCATCAGCGTCAGAAAAGACCCAGTAAGCCGCTTTC
GCCACAGGTGTTCCTTACGATATCAACGCATTTCACCGCTCCACCGTAAGTTCCGCTTACCTCTATCTTCCTCAAGCACA
GTAGTTTTGGGCGCAGTTCCTCGGTTGAGCCGAGGTATTTCACACCCAACTTACTGCGCAGCCTACGCACCCTTTAAGCC
CAGTAATTCCGAATAACGTTTGTGTGGTTCGTCTT
>OTU_568
GGACTACCGGGGTTTCTAATCCTGTTTGCTCCCCACGCTTTCGCACCTCAGCGTCAGTACCGGACCAGTTAGCCGCCTTC
GCCACTGGTGTTCTTCCCAATATCTACGAATTTCACCTCTACACTGGGAATTCCACTAACCTCTTCCGGACTCGAGACAC
CCAGTATCAAGGGCAGTTCCGAGGTTGAGCCTCGGGATTTCACCCCTGACTTAAATGTCAGCCTACGTGCGCTTTACGCC
CAGTAATTCCGAACAACGCTAGCCCCCTTCGTATT
>OTU_569
GGACTACCGGGGTTTCTAATCCCGTTTGCTACCCTGGCTTTCGCATCTCAGCGTCAGACACAGTCCAGAAAGGCGCCTTC
GCCACTGGTGTTCCTCCCAATATCTACGCATTTCACCGCTACACTGGGAATTCCCCTTTCCTCTCCTGCACTCAAGACTT
CCAGTATCCAACGCCATACGGGGTTAAGCCCCGCATTTTCACGTCAGACTTAAAAGCCCGCCTACATGCTCTTTACGCCC
AATAATTCCGGACAACGCTTGCCACCTACGTATTA
>OTU_570
GGACTACTCGGGTATCTAATCCTGTTTGCTCCCCACGCTTTCGTGCCTCAGTGTCAGTTACAGTCCAGCAATTCGCCTTC
GCCACTGGTGTTCCTCCTAATATCTACGCATTCCACCGCTACACTAGGAATTCCAATTGCCCCTCCTGCACTCAAGTTCT
GCAGTTTTGGCAGTAGTGCCGAGGTTGAGCCCCGGAGTTACGCTGCCAACTTGCAAAACCACCTACGCACCCTTTACGCC
CAGTCATTCCGGATAACGCTTGCCTCCTACGTATT
>OTU_571
GGACTACCGGGGTTTCTAATCCTGTTTGATCCCCACGCTATCGTGCCTCAGCGTCGGTATATCCCCAGCGAGCTGCCTTC
GCTGTCGGCGTTCTGGTTGATATCTATGCATTTCACCGCTACACCATCCATTCCGCCCGCCCAGAGATAACCCAAGCCAT
ACAGTATCAATGGCACTCCTTGGGTTAAGCCCAAGGGTTTCACCACTGACTTATATGGCCGCCTACGCACCCTTTAAACC
CAATAAATCCGGACAACGCTTGCACCCTCCGTATT
>OTU_572
GGACTACTAGGGTTTCTAATCCTGTTTGCTCCCCACGCTTTCGCGCCTCAGCGTCAGTTATCGTCCAGCAATCCGCCTTC
GCCACTGGTGTTCCTCCGTATATCTACGCATTTCACCGCTACACACGGAATTCCGATTGCCTCTCCGACACTCAAGAACT
ACAGTTTCAAATGCAGGCTATGGGTTGAGCCCATAGTTTTCACATCTGACTTGCAGTCCCGCCTACACGCCCTTTACACC
CAGTAAATCCGGATAACGCTTGCCACCTACGTATT
>OTU_573
GGACTACTGGGGTTTCTAATCCTGTTTGCTACCCACGCTTTCGAGCCTCAGCGTCAGTTAAAGCCCAGCAGGCCGCCTTC
GCCACTGGTGTTCCTCCTAATATCTACGCATTTCACCGCTACACTAGGAATTCCGCCTGCCTCTACTTCACTCAAGAACT
GCAGTTTTGAACGCAGTTTATGGGTTAAGCCCATAGATTTCACATTCAACTTGCAATCCCGCCTACGCTCCCTTTACACC
CAGTAATTCCGGACAACGCTCGCTCCCTACGTATT
>OTU_574
GGACTACCGGGGTTTCTAATCCCATTCGCTACCCACGCTTTCGTGCTTCAGTGTCAGAAATGTACCAGTGCGCTGCCTTC
GCTTTTGGTGTTCCCCATGATATCAACGGATTTCACCCCTACACCATGAGTTCCGCGCACCTCTCACACTCTCAAGCTTT
GACGTTTCTTTTGCGATTCCCAAGTTGAGCTCGGGGATTTAACAAAAGACTATCAAAGCAACCTACGCACCCTTTACGCC
CAGTAATTCCGAATAACGCTCGGGGCTCTCGTATT
>OTU_575
GGACTACTGGGGTATCTAATCCTCTTTGCTACCCATACTTTCGCGCCTCAGCGTCAGTGTTGATCCAGAAAGCCGCCTTC
GCAACTGGTGTTCTACATAATATCTACGAATTTCACCTCTACACTCGGTATTCCACTCGCCTCTCCTGACCTCCAGGCTT
GCAGTTTAGAAGGCAGTTCCAGGGTTGAGCCCTGGGATTTCACCCCCTACTTACAAACCCGCCTACGTGCGCTTTACGCC
CAGTAATTCCGAACAACGCTAGCCCCCTTCGTATT
>OTU_576
GGACTACTGGGGTTTCTAATCCTGTTTGCTCCCCACGCTTTCGCGCCACAGCGTCAGTGTTAGACTAGGAAGCTGCCTTC
GCCATCGGTGTTCTTCCTGATATCTACGCATTTCACCGCTACACCAGGAATTCCGCTTCCCTCTTCTAAACTCAATCCTA
ACAGTATCTCCAGCAATTCTCCCGTTGAGCAGGAGTATTTCACCAGAAACTTATTAGGACGCCTACGCGCTCTTTACGCC
CAGTGATTCCGGACAACGCTTGCTCCCCCCGTATT
>OTU_577
GGACTACACGGGTATCTAATCCTGTTTGCTCCCCACGCTTTCGCACCTCAGCGTCAGTATCGAGCCAGTGAGCCGCCTTC
GCCACTGGTGTTCCTCCGAATATCTACGAATTTCACCTCTACACTCGGAATTCCACTCACCTCTCTCGAACTCCAGACCG
ATAGTTTTGAGGGCAGTTCCGGGGTTGAGCCCCGGGATTTCACCCCCAACTTTCCGATCCGCCTACGTGCGCTTTACGCC
CAGTAATTCCGAACAACGCTAGTCCCCTCCGTATT
>OTU_578
GGACTACTGGGGTTTCTAATCCCGTTTGCTACCCTGGCTTTCGCTCATCAGTGTCAATGCCGGTCCAGGACGCCGCCTTC
GCCACCGGTGTTCCTCCAGATATCTACGCATTTCACCGCTACACCTGGAATTCCACGTCCCTCTCCCGGATTCAAGCCGC
CCAGTATCTGACGCAGTTCCCCGGTTGAGCCGAGGGATTTCACGTCGGACTAAAGCGGCCACCTACGAGCCCTTTACGCC
CAGTAATTCCGAACAACGCTTGCCCCCCCCGTATT
>OTU_579
GGACTACCCGGGTATCTAATCCTGTTTGCTCCCCACGCTTTCGAGCCTCAACGTCAGTTACCGTCCAGTAAGCCGCCTTC
GCCACTGGTGTTCCTCCTAATATCTACGCATTTCACCGCTACACTAGGAATTCCGCTTACCTCTCCGGTACTCAAGATCA
ACAGTTTCCAATGCAGTCCGGGGGTTGAGCCCCCGCCTTTCACATCAGACTTGCTGCTCCGTCTACGCTCCCTTTACACC
CAGTAAATCCGGATAACGCTTGCCCCCTACGTATT
>OTU_580
GGACTACTGGGGTATCTAATCCTGTTTGATCCCCACGCTTTCGTGCTTCAGTGTCAGTTATAGTTTAGTAAGCTGCCTTC
GCAATCGGAGTTCTGCGTGATATCTATGCATTTCACCGCTACACCACGCATTCCGCCTACCTCAAATATACTCAAGTCAA
CCAGTTTCAACGGCAATTTTATGGTTGAGCCACAAACTTTCACCGCTGACTTAATTAACCACCTACGCACCCTTTAAACC
CAATAAATCCGGATAACGCTCGCATCCTCCGTATT
>OTU_581
GGACTACTGGGGTATCTAATCCTGTTTGCTCCCCACGCTTTCGAGCCTCAACGTCAGTTACCGTCCAGTAAGCCGCCTTC
GCCACTGGTGTTCCTCCTAATATCTACGCATTTCACCGCTACACTAGGAATTCCGCTTACCCCTCCGGCACTCAAGTACA
GCAGTTTCCAATGCAGTCCAGGGGTTAAGCCCCTGCCTTTCACATCAGACTTGCTGCGCCGTCTACGCTCCCTTTACACC
CAGTAAATCCGGATAACGCTTGCCCCCTACGTATT
>OTU_582
GGACTACACGGGTTTCTAATCCTGTTTGCTCCCCACGCTTTCGCATCTCAGTGTCAGTAACGTCCCAGCGAGCTGCCTTC
GCTATTGGTGTTCCTCCTGATATCTGCGCATTCCACCGCTACACCAGGAATTCCACTCGCCTCTTCCGTACTCTAGACCA
ACAGTATCCACCGGCTTTCAAAGGTTGAGCCTTTGACTTTCACAGCAGACTAATTGATCCACCTACATGCTCTTTACGCC
CAATGATTCCGGACAACGCTCGCTCCCTACGTATT
>OTU_583
GGACTACTGGGGTTTCTAATCCCGTTCGCTCCCCTAGCTTTCGCGTATCAGCGTCAGGGGCAGCCCAGGAAGCCGCTTTC
GCCACAGGTGTTCCTCCCGATATCTACGCATTCCACCGCTACACCGGGAATTCCACTTCCCTCTTCTGCCCTCAAGTGCC
CCAGTTTTGAATGGCCCCTCCCAGTTAGGCCAGGAGATTTCACATCCAACTTGAAGCACCGCCTACACGCGCTTTACGCC
CAATAAATCCGGATAACGCTAGTCTCCTACGTTTT
>OTU_584
GGACTACTCGGGTTTCTAATCCTGTTTGCTCCCCACGCTTTCGTGTCTCAGCGTCAGTAATCGTCCAGTAACCCGCCTTC
GCCACCGGTGTTCCTCCTGATATCTACGCATTTCACCGCTACACCAGGAATTCCAGTTACCTCTCCGACCCTCAAGAACC
ACAGTTTCGAATGCAGGTCACGAGTTAAGCCCGTGATTTTCACATCCGACTTGCGGTCCCGCCTACACACCCTTTACACC
CAGTAAATCCGGATAACGCTCGCCACCTACGTATT
>OTU_585
GGACTACCGGGGTTTCTAATCCTGTTTGCTCCCCACGCTTTCGTGCATGAGCGTCAGTATTGGCCCAGGGGGCTGCCTTC
GCCATCGGTATTCCTCCACATCTCTACGCATTTCACTGCTACACGTGGAATTCTACCCCCCTCTGCCACACTCTAGCCGT
GCAGTCTCAAATGCAGTTCCCAGGTTGAGCCCGGGGATTTCACATCTGACTTACACAACCGCCTGCGCACGCTTTACGCC
CAGTAATTCCGATTAACGCTCGCACCCTACGTATT
>OTU_586
GGACTACTAGGGTTTCTAATCCTGTTTGATTCCCGCACTTTCGAGCCTCAGCGTCAGTAACACCCCAGAAGGCTGCCTTC
GCAATCGGAGTTCTTCGTCATATCTAAGCATTTCACCGCTACACGACGAATTCCACCTTCCTTGTGTGAACTCAAGGCCG
CCAGTATCAACGGCATGCCAAGGTTGGGCCCTGACATTTGACCGCTGACTTAACAGCCCGCCTACGCTCCCTTTAAACCC
AATAAATCCGGATAACGCTCGCATCTTCCGTATTA
>OTU_587
GGACTACACGGGTATCTAATCCTGTTCGCTACCCATGCTTTCGCTCCTCAGCGTCAGTTACTGCCCAGAGACCTGCCTTC
GCCATCGGTGTTCCTCCTGATATCTGCGCATTTCACCGCTACACCAGGAATTCCAGTCTCCCCTACAGCACTCAAGTTAT
GCCCGTATCGCCTGCCATCCCACAGTTAAGCCGTGGACTTACACAAACGACGCGACAAACCACCTACGAGCTCTTTACGC
CCAGTAATTCCGGACAACGCTCGCACCCTACGTAT
>OTU_588
GGACTACTCGGGTATCTAATCCTGTTTGCTCCCCACGCTTTCGCGCCTCAACGTCAGTTACAGTCCAGAAAGCCGCCTTC
GCCACTGGTGTTCCTCCTAATATCTACGCATTTCACCGCTACACTAGGAATTCCGCTTCCCTCTCCTGCACTCAAGCTGA
ACAGTATTACCGGCAATTCCAGCCTTAAAAGCTGGGCTTTCACCAGTAACTTACTCAGCCGTCTACGCGCCCTTTACGCC
CAATAATTCCGGACAACGCTCGCCCCCTACGTATT
>OTU_589
GGACTACAGGGGTTTCTAATCCCTTTTGCGCCCCTAGCCTTCATCCCTTACTGTCAGAACTGTCCTCGTAAGATGCCTTC
GCTGTTGTTAGTCCGTCTGGGATTAACACATTTTACCGCTACTCCAAACGTACTTCTTACGTCTTCCAGTCTCTAGCTTA
ACAGTACTTCTTGCCCGCTCCATATTTGAGACATGGAATTTCACAAGAAACTTATTAAGCAAGCTACGGATGTTTTAGAC
CCAATAATGATGGCTGCGACTTGGACCGCGAGTAT
>OTU_590
GGACTACCAGGGTTTCTAATCCTGTTTGCTCCCCACGCTTTCGCACCTCAGCGTCAGTATCGAGCCAGTGAGCCGCCTTC
GCCACTGGTGTTCCTCCGAATATCTACGAATTTCACCTCTACACTCGGAATTCCACTCACCTCTCTCGACCTCAAGACCA
GCAGTATCAAAGGCAGTTCCGGGGTTGAGCCCCGGGATTTCACCCCTGACTGACTGATCCGCCTACGTGCGCTTTACGCC
CAGTAATTCCGAACAACGCTAGCCCCCTCCGTATT
>OTU_591
GGACTACTGGGGTATCTAATCCCATTCGCTCCCCTGGCTTTCGTTCCTCAGTGTCAGTTATGGCCCAGCTAGTCGCCTAC
GCCACCGGTGTTCTTCCCAATATCTACGCATTTCACCGCTACACTGGGAATTCCACTAGCCTCTACCACACTCGAGTCTG
CCAGTATTCAGTGCAGTTTCAGGGTTGAGCCCCAATCTTTAACACCAAACTTAACAAACCACCTACGAACTCTTTACGCC
CAATAAATCCGGACAACGCTTGCATCCTACGTCTT
>OTU_592
GGACTACCCGGGTTTCTAATCCCGTTCGCTCCCCCGGCTTTCGCGCTTCAGCGTCAGATCACATCCAGCGAACCGCCTTC
GCCACCGGTATTCTTCCTGATATCTACGCATTTCACCGCTACACCAGGAATTCTGTTTGCTTCTCTGTGTCTCCAGTGTC
TCAGTTTCGGCCGCTCCTTGAGGTTAAGCCTCAATATTTAACGAACGACTTGAGTCACCGCCTACGCGCCCTTTACGCCC
AGTAATTCCGGATAACGCTCGCTCCCTACGTATTA
>OTU_593
GGACTACTGGGGTATCTAATCCTGTTTGCTCCCCCAGCTTTCGAGCCTCAGCGTCAGTATTGGGCCAGGTGACCGCCTTC
GCTACTGGTGTTCTTCCAGATATCTACGCATTCCACCGCTACACCTGGAATTCCATCACCCTCTCCCATACTCAAGAACC
GCAGTATTAAAAGCATATCACGGGTTGAGCCCATGTATTAAACTCCTAACTTACGATCCCGCCTACGCTCCCTTTACGCC
CAGTGATTCCGAACAACGCTCGCACCCTACGTATT
>OTU_594
GGACTACTGGGGTTTCTAATCCTGTTTGCTACCCACGCTCTCGCGTCTCAGCGTCAGTATAGGGCCAGAAAGTCGCCTTC
GCCGCCGGTGTTCCTCCTGATATCTACGAATTTCACCTCTACACCAGGAATTCCACTTTCCTCTCCCTTACTCAAGCCGA
ACAGTTTCAAATGCACTTCCCGGGTTAAGCCCGGGGCTTTCACATCTGACTTGCTCAGCCGCCTACACGCTCTTTACGCC
CAATAATTCCGAACAACGCTTGCACCCCCCGTATT
>OTU_595
GGACTACCCGGGTTTCTAATCCGGTTCGCTCCCCTAGCTTTCGTGCCTCAGCGTCGGTCACAGCCCAGCAGACCGACTTC
TCCACCGGCGTTCCTGCTGATATCTACGGATTTCACCCCTACACCAGCAGTTCCATCTGCCTCTGCTGCACCCAAGCCTT
ACAGTTTCCAGCGCATCTCCCTAGTTGAGCCAGGGCTTTTAACACCGGACTTGCAAGGCCGCCTACGCACCCTTTACGCC
CAGTAATTCCGGGTAACGCTCGCCCCCTACGTATT
>OTU_596
GGACTACTGGGGTTTCTAATCCTGTTCGATACCCGCGCTTTCGTGCCTCAGCGTCAATTGCGGATTCGTGAGATGCCTTC
GCAATCGGTGTTCTGTGTGATATCTATGCATTTCACCGCTACACCACACATTCCTCCCACGGCATCCGCATTCCAGGACG
GCAGTATCAAACGCACGTTCCACGTTGAGCGTGGACATTTCACGGCTGACTTACCACCCCGCCTACGCACCCTTTAAACC
CAATAAATCCGGATAACGCTCGCATCCCCCGTATT
>OTU_597
GGACTACTGGGGTATCTAATCCTGTTTGCTCCCCACGCTTTCGTGCCTCAGCGTCAATGACCGTCCAGCAGGCCGTCTGC
ACCACGGGTGTTCCTCCTGATATCTACGCATTTCACCGCTACACCAGGAATTCCGCCTGCCTCTCCGGTATTCAAGCAAC
CCAGTTTCTAGCGCACCCTCCCAGTTAAGCCGGGAGATTTCACAACAAACTTACGGGACCGCCTACGCACTCTTTACGCC
CAGTAACTCCGAACAACGCTTGCTGCCTACGTATT
>OTU_598
GGACTACTGGGGTATCTAATCCTGTTTGCTCCCCACGCTTTCGCGCCTCAGCGTCAGTTACTGTCCAGAAAGCCGCCTTC
GCCACTGGTGTTCCTCCTAATCTCTATGCATTTCACCGCTACACTAGGAATTCCACTTTCCTCTCCAGTACTCAAGATCA
ACAGTTTCAGTTGCAGTTCCGGAGTTAAGCCCCGGCATTTCACATCTGACTTGCTGACCCGCCTACACGCCCTTTACACC
CAGTAAATCCGGACAACGCTTGCCACCTACGTATT
>OTU_599
GGACTACTCGGGTTTCTAATCCTGTTTGCTACCCTAGCTTTCGCACTTCAGCGTCAATATCGGTCCAGAGAGCTACCTTC
GTCATCGGCATTCCTACAAATATCTACGAATTTCACCTCTACACTTGTAGTTCCGCCCTCCTATCCCGTATTCTAGTCTA
TCAGTTTCAAAGGCAAGACCAAAGTTGAGCTTCGGCTTTTCACCTCTGACTTAATAAACCGCCTAGATGCCCTTTACGCC
CAGTGATTCCGGATAACGCTCGCACCTTATGTCTT
>OTU_600
GGACTACAAGGGTTTCTAATCCTGTTTGCTCCCCACGCTTTCATGCCTCAGCGTCAGTTACAGTCCAGAGAGCCGCCTTC
GCCACTGGTGTTCTTCCTAATCTCTACGCATTTCACCGCTACACTAGGAATTCCACTCTCCTCTCCTGCACTCTAGATGC
CCAGTTTCAAATGCAGTTCCCAAGTTAAGCCCGGGATTTTCACATCTGACTTAAGCATCCGCCTACGCATCCTTTACGCC
CAGTAATTCCGGACAACGCTTGCCACCTACGTATT
>OTU_601
GGACTACCGGGGTTTCTAATCCTGTTTGCTCCCCACGCTTTCGAGCCTCAACGTCAGTTACCGTCCAGTAAGCCGCCTTC
GCCACTGGTGTTCCTCCTAATATCTACGCATTTCACCGCTACACTAGGAATTCCGCTTACCTCTCCGGCACTCCAGCAAA
ACAGTTTCCAATGCAGGCCCGGGGTTGAGCCCCGGGTTTTCACACCAGACTTGCTTCGCCGTCTACGCTCCCTTTACACC
CAGTAAATCCGGATAACGCTTGCCCCCTACGTATT
>OTU_602
GGACTACCGGGGTTTCTAATCCGGTTCGCGCCCCTGGCTTTCGTTACTCACCGTCAGGTCCGTTCCAGCTGGACGCCTTC
GCCACAGGTGGTCCTCCCGGGATTATAGGATTTCACCCCTACCCCGGGAGTACCTCCAGCCTCTCCCGGCCTCAAGCCTG
ATAGTATCTCCAGCAATTCCCACAGTTAAGCTGTAGGATTTCACCAGAGACTTATCAAGCCGGCTACGAACGCTTTAGGC
CCAATAAAAACGGCCACCACTCGAGCTGCCGGTGT
>OTU_603
GGACTACTAGGGTTTCTAATCCTGTTTGCTCCCCACGCTTTCGCGCCTCAGCGTCAGTTGCGGCCCAGTAAGTCGCCTTC
GCCACTGGTGTTCCTCCCAATCTCTACGCATTTCACCGCTATACTGGGAATTCCACTTACCTCTTCCGCACTCTAGCCAT
CCAGTTTCCAATGCACGACCCACCTTAAAAGCGGGTATTTCACATCAGACTTAGTCGGCCGCCTACACGCCCTTTACGCC
CAGTCATTCCGGACAACGCTCGCCCCCTACGTATT
>OTU_604
GGACTACCAGGGTATCTAATCCTGTTTGCTCCCCACGCTTTCGTGCCTCAGTGTCAGTTACGGCCCAGTATGTCGCTTTC
GCCACCGGTGTTCCTCCTAATATCTACGCATTCCACCGCTACACTAGGAATTCCACATACCCCTGCCGCACTCAAGCCTA
CCAGTTTTGGCAGTAGTCCCGCGGTTAAGCCACGGAATTACGCTGCCAACTTGGCAAACCACCTACGCACCCTTTACGCC
CAGTCATTCCGGATAACGCTTGCATCCTACGTATT
>OTU_605
GGACTACCAGGGTTTCTAATCCTGTTTGCTCCCCACGCTTTCGAGCCTCAGCGTCAGTAAAAGCCCAGTAAGCCGCCTTC
GCCACCGATGTTCCTCCTAATATCTACGCATTTCACCGCTACACTAGGAATTCCGCTTACCTCTACTTCACTCAAGAACA
GCAGTTTCAAATGCAGTCTATGGGTTGAGCCCATAGTTTTCACATCTGACTTACCATCCCGCCTACGCTCCCTTTACACC
CAGTAATTCCGGACAACGCTCGCTCCCTACGTATT
>OTU_606
GGACTACTGGGGTTTCTAATCCTGTTTGCTCCCCACGCTTTCGTGCCTCAGCGTCAGTTATGGTCCAGTAAGCCGCCTTC
GCCACTGGTGTTCCTCCTAATATCTACGCATTCCACCGCTACACTAGGAATTCCACTTACCTCTCCCACACTCAAGTCCC
GCAGTCTTAGAAGTAGCTCCGGGGTTAAGCCCCGGGATTACACTTCTAACTTACGAAACCGCCTACGCACCCTTTACGCC
CAGTCATTCCGGACAACGCTTGCTCCCTACGTATT
>OTU_607
GGACTACTGGGGTATCTAATCCTGTTTGATCCCCACGCTTTCGTGCCTCAGCGTCAACTATGGTCTAGTACCCCGCCTTT
GCCTCCGGTGTTCTGTGTGATATCTACGCATTTCACCGCTACACCACACATTCCAGGTACCCCTCCCATGTTCTTAGTTA
TACAGTATCGCCAGCACTACTACAGTTGAGCCGTAGCCTTTCACTGACAACTTATTTAACCGCCTACGCACCCTTTAAAC
CCAGTAATTCCGAATAACGCTTGCACCCTCCGTAT
>OTU_608
GGACTACTCGGGTTTCTAATCCGGTTTGCTCCCCCAGCTTTCGTCCCTCACTGTCGGAGCCGTTCTGGTGAGGCGCCTAC
GCCACAGGTGGTCCCCCAAGGATTACAGGATTTCACTCCTACCCCTGAAGTACCCCTCACCTCTCCCGGTCCCTAGATTG
CCAGTATCCCTTGGACGCCTATCGGTTAAGCCGGTAGATTTCCCAAGAGACTTAACAACCCAGCTACGAACGCTTTAAGC
CCAGTAATCGTGGCCACCACTCGAGCCGCCGGTAT
>OTU_609
GGACTACCCGGGTTTCTAATCCTGTTTGCTCCCCACGCTTTCGTACATCAGCGTCAGATGTGGCCCAGTAAACCGCCTTC
GCCACTGGTGTTCCTCCAAATCTCTACGCATTTCACCGCTCCACTTGGAATTCCATTTACCTCTACCACTCTCTAGACCC
GTAGTTTCTAATTACCTCACACGGTTAAGCCGTGTGCTTTCAAATCAGACTTGCAGGCCCGCCTACGTACCCTTTACGCC
CAATAATTCCGGATAACGCTCGCCCCCTATGTATT
>OTU_610
GGACTACTCGGGTTTCTAATCCTGTTTGCTACCCATGCTTTCGCTCCTCAGCGTCAGTTACGGCCCAGAGCGGCGCCTTC
GCCGCTGGTGTTCCTCCTGATATCTGCGCATTTCACCGCTACACCAGGAATTCCCCGCTCCCCTACCGCACTCTAGTCAC
AGCAGTATCGGGTGGCCTCTCTGGGTTGAGCCCAGAGTTTTCACACCCGACTTACCGAACCGCCTACGAGCTCTTTACGC
CCAATAAATCCGGATAACGCTTGGTGCCTACGTGT
>OTU_611
GGACTACCCGGGTTTCTAATCCTGTTTGATCCCCACGCTTTCGTGCCTCAGCGTCGATAGTGGTTTTGTGAGCTGCCTTC
GCAATCGGTGTTCTATGACATATCTAAGCATTTCACCGCTACACCAGGAATTCCACTTTCCTCTACCAGACTCAAGCCTG
CCAGTTCGAGGTGCAGGCCGCGGGTTGAGCCCCCGGTTTTCACACCTCGCTTAACAAGCCGCCTACGCGCGCTTTACGCC
CAATGAATCCGGATAACGCTTGCCCCCTACGTATT
>OTU_612
GGACTACCCGGGTATCTAATCCTGTTTGCTCCCCACGCTTTCGTGCATGAGCGTCAGTGCAGGCCCAGGGAACTGCCTTC
GCCATCGGTGTTCCTCCGCATATCTACGCATTTCACTGCTACACGCGGAATTCCATTCCCCTCTGCCACACTCCAGTCAT
GCAGTCACGAATGCAGTTCCCAGGTTGAGCCCGGGGATTTCACATCCGTCTTGCATGACCGCCTGCGCACGCTTTACGCC
CAGTAATTCCGGACAACGCTCGCCCCCTACGTGTT
>OTU_613
GGACTACTCGGGTTTCTAATCCTGTTTGCTCCCCACGCTTTCGCACCTCAGTGTCAGTATTAGCCCAGGTGGTCGCCTTC
GCCACTGGTGTTCCTTCCTATATCTACGCATTTCACCGCTACACAGGAAATTCCACCACCCTCTGCCATACTCTAGCTCG
CCAGTTTTGGATGCAGTTCCCAGGTTGAGCCCGGGGCTTTCACATCCAACTTAACGAACCACCTACGCGCGCTTTACGCC
CAGTAATTCCGATTAACGCTTGCACCCTTCGTATT
>OTU_614
GGACTACAAGGGTTTCTAATCCTGTTTGCTACCCACGCTTTCGTACCTCAGCGTCAGATTATGGCCAGAAAGTCGCCTTC
GCCACCGGTATTCCTCCTAATATCTGCGCATTTCACCGCTACACTAGGAATTCCACTTTCCCTTCCATATCTCAAGATGA
GCAGTTTTAAAAGCTTACTGTAGTTGAGCTACAGGATTTCACTTCTAACTTGCTTACCCGCCTACGTACCCTTTACGCCC
AATGATTCCGGACAACGCTCGGACCTTACGTATTA
>OTU_615
GGACTACTGGGGTTTCTAATCCTGTTCGCTCCCCCAGCTTTCGCGCCTCAGCGTCAGTTTCGGCCCAGAGAGCTGCCTTC
GCCGTCGGTGTTCTTCCCGATATCTGCGCATTCCACCGCTACACCGGGAATTCCGCTCTCCCCTACCGCACTCGAGAGCG
CCAGTTCGGGACCCGGCCGGGGGTTGAGCCCTCGGGTTAGAGGTCCCGCTTAGCGCTCCGCCTACGCGCGCTTTACGCCC
AATGAATCCGGATAACGCTCGCCCCATACGTATTA
>OTU_616
GGACTACAGGGGTTTCTAATCCTGTTTGCTCCCCACGCTTTCGAGCCTCAGCGTCAGTAATTGTCCAGTAAGCCGCCTTC
GCCACTGGTGTTCCTCCTAATATCTACGCATTTCACCGCTACACTAGGAATTCCACTTACCCCTCCGACACTCTAGTCCG
ACAGTTTCCAATGCAGTACCGGGGTTGAGCCCCGGGATTTCACATCAGACTTGCCGTACCGCCTGCGCTCCCTTTACACC
CAGTAAATCCGGATAACGCTTGCACCATACGTATT
>OTU_617
GGACTACCCGGGTATCTAATCCTGTTTGCTTCCCACGCTTTCGAGCCTCAACGTCAGTTATCGTCCAGTAAGCCGCCTTC
GCCTCCGGTGTTCTTTCTGATATCTACGCATTTCACCGCTACACCAGGAATTCCACTTACCTCTCCGACACTCTATCAAA
ACAGTTTCCAAAGCACTTCCGGAGTTGAGCCCCGGATTTTCACTTCAGACTTGCTTCGCCGTCTACGCTCCCTTTACACC
CAGTAAATCCGGATAACGCTTGCCCCCTACGTATT
>OTU_618
GGACTACCCGGGTATCTAATCCTGTTCGCTCCCCATGCTTTCGCTCCTCAGCGTCAGTTACGGCCCAGAGATCTGCCTTC
GCCATTGGTGTTCCTCCTGATATCTGCGCATTCCACCGCTACACCAGGAATTCCAATCTCCCCTACCGCACTCTAGCCTG
CCCGTACCCACTGCAAGCCCGAGGTTGAGCCTCGGGTTTTCACAGCAGACGCGACAAGCCGCCTACGAGCTCTTTACGCC
CAATAATTCCGGACAACGCTTGCACCCTACGTATT
>OTU_619
GGACTACCAGGGTTTCTAATCCTGTTCGATACCCGCGCTTTCGAGCTTCAGCGTCAGTTACGCTCCCGCCAGCTGCCTTC
GCAATCGGGGTTCTTCGTCATATCTAAGCATTTCACCGCTACACGACGAGTTCCGCCGGCGTTGCGCGCACTCAAGTGGG
GCAGTTCGCGCTGCAGTGCAGACGTTGGGCGCCTACATTTCACAACACGCTTACCTCACGGCCTACGCTCCCTTTAAACC
CAATAAATCCGGATAACGCCCGGACCTTCCGTATT
>OTU_620
GGACTACTAGGGTTTCTAATCCTGTTTGATCCCCACGCTTTCGCGCCTCAGCGTCAGGGTTAGGCCAGAGAGCCGCCTTC
GCCACTGGTGTTCCTCCCAATATCTACGCATTTCACCGCTACACTGGGAATTCCACTCCCCTCTCCTGCCCTCAAGTTAC
CCAGTTTCAGAGGCAGGCCCTGAGTTGAGCCCAAGGTTTTCACCCCTGACTTGGATAACCGCCTACGCGCCCTTTACGCC
CAGTAATTCCGGACAACGCTCGCCCCCTACGTTTT
>OTU_621
GGACTACCCGGGTTTCTAATCCTGTTCGCTCCCCACGCTTTCGCGCTTCAGCGTCAGTATTAAGCCAGGTGGCTGCCTTC
GCCATTGACGTTCCTTCCGATCTCTACGCATTTCACCGCTACACCGGAAATTCCGCCACCCTCTCTTATACTCCAGCTAG
TTGGTTTGCGATGCACTTCCTAGGTTAAGCCCAGGGCTTTCACATCACACCTTCCTAACCGCCTACGCGCCCTTTACGCC
CAGTAATTCCGATTAACGCTCGCACCCTCTGTATT
>OTU_622
GGACTACCCGGGTTTCTAATCCCGTTCGCTACCCACGCTTTCGTTCCTCAGTGTCAGGTATTGCCCAGCAGACTGCCTTC
GCCATTGGTGTTCTTCATGATATCTACGCATTCCACTGCTACACCATGAATTCCATCTGCCTCTGCGAACCTCTAGCTAG
AAAGTTTCGGATACGATTCCTCGGTTGAGCCGAGGGCTTTAATGCCCGACTTTTCTTGCCACCTACGAACTCTTTACGCC
CAATAATTCCGGATAACGTTCGGACCCTACGTATT
>OTU_623
GGACTACCCGGGTATCTAATCCTGTTTGCTACCCATGCTTTCGAGCCTCAGCGTCAGTTACAGACCAGACAGCCGCCTTC
GCCACTGGTGTTCTTCCATATATCTACGCATTTCACCGCTACACATGGAGTTCCACTGTCCTCTTCTGCACTCAAGTTTC
CCAGTTTCCGATGCACTTCTTCGGTTGAGCCGAAGGCTTTCACATCAGACTTAAGAAACCGCCTGCGCTCGCTTTACGCC
CAATAAATCCGGACAACGCTTGCCACCTACGTATT
>OTU_624
GGACTACCGGGGTTTCTAATCCCGTTTGCTACCCACGCTTTCGAGCCTCAGCGTCAGTTTCGCGCCAGAAGACCGCTTTC
GCCACCGGTGTTCCTCAGGATATCTGTGCATTTCACCGCTACACCCTGAATTCCGTCTTCCTATCACGAACTCAAGACAA
GCAGTATCCGAAGCAAGTCCGAGGTTGAGCCCCGGGATTTCACTTCAGACTGACTTGCCCGCCTGCGCTCCCTTTACGCC
CAGTAATTCCGAACAACGCTTGGAACCTCCGTATT
>OTU_625
GGACTACTCGGGTTTCTAATCCTGTTTGCTACCCACGCTTTCGCTCCTCAGCGTCAGTATCGGCCCAGAGCGGCGCCTTC
GCCACCGGTGTTCCTCCTAATATCTGCGCATTTCACCGCTACACTAGGAATTCCCCGCTCCCCTACCGAACTCTAGTCAC
AGCAGTATCGGATGCAGGCTTTGGGTTAAGCCCAAAGTTTTCACACCCGACTTACCGAACCGCCTACGAGCTCTTTACGC
CCAATAAATCCGGACAACGCTTGGTGCCTACGTGT
>OTU_626
GGACTACTGGGGTTTCTAATCCTGTTTGATACCCACACTTTCGTGCATGAGTGTCAGTAAAAGCCAAGTGAGCTGCCTAC
GCAATTGGAGTTCTTGATAATATCTATGCATTTCACCGCTACACTATCAATTCCGCCCACCTCTACTTTACTCAAGTCTA
CCAGTATCAATGGCACTGCAATCGTTGAGCGACCGTCTTTCACCACTGACTTAATAAACCACCTGCGCACCCTTTAAACC
CAATAAATCCGGACAACGCTTGCACCCTCCGTATT
>OTU_627
GGACTACCCGGGTATCTAATCCTGTTTGCTCCCCACGCTTTCGCGTCTCAGCGTCAGTACCGTCCCAGAGACCCGCCTTC
GCCACCGGTGTTCTTCCTGATATCTGCGCATTTCACCGCTACACCAGGAATTCCAGTCTCCTCTTCCGGACTCAAGCCGG
CCAGTTTCCAGTGCAGACTCAGGGTTGAGCCCTGAGCTTTCACACCGGACTTGGTCGGCCGCCTACACGCGCTTTACGCC
CAATGATTCCGGACAACGCTCGCCCCCTACGTATT
>OTU_628
GGACTACCCGGGTTTCTAATCCTGTTCGCTCCCCACGCTTTCGTGCATCAGCGTCAGTAATAGCTTGGAAAGCTGCCTTC
GCAATCGGTGTTCTGTGTGATATCTAAGCATTTCACCGCTACACCACACATTCCGCCTTCCGCAACTATACTCTAGACTA
ACAGTATCAGAGGCAATTTCGATGTTGAGCATCGAGCTTTCACCTCTAACTTACTAATCCGCCTACGCACCCTTTAAACC
CAATAAATCCGGATAACGCTCGGGTCCTCCGTATT
>OTU_629
GGACTACCCGGGTTTCTAATCCTGTTCGCTCCCCACGCTTTCGTGCCTCAGCGTCAGTATCGCCTTAGTAAGCTGCCTTC
GCAATTGGTGTTCTATGTCATATCTAAGCATTTCACCGCTACACGACATATTCCGCCTACTTCAAGCGCACTCAAGAATA
TCAGTATCAATGGCAAGTCTACAGTTGAGCTGCAGGATTTCACCACTGACTTAATGTTCCGCCTACGCACCCTTTAAACC
CAATGAATCCGGATAACGCTTGCACCCTTCGTATT
>OTU_630
GGACTACCGGGGTTTCTAATCCTGTTTGATACCCACACTTTCGTGCCTCAGCGTCAGTAGCAATATAGTAAGCTGCCTAC
GCAATCGGAGTTCCTCGTTATATCTACGCATTTCACCGCTACACAACGAATTCCGCCTACCTCTACTGCACTCAAGAATA
ACAGTTTCAACGGCAATTTTAAGGTTGAGCCGAAAACTTTCACCGCTGACTTAATATCCCGCCTACGCACCCTTTAAACC
CAATAAATCCGGATAACGCTCGCATCCTCCGTATT
>OTU_631
GGACTACCAGGGTATCTAATCCCAGTTTGGGTCTTAGCTATTGTGTGTTCAGATATGTTAAAGCCACTTTCGTAGTCTAT
TTTGTGTCAACTGGAGTTTTTTACAACTCAGGTGAGTTTTAGCTTTATTGGGGAGGGGGTGATCTAAAACACTCTTTACG
CCGGCTTCTATTGACTTGGGTTAATCGTGTTACCGCGGCTGCTGGCACCTGTCTCTTATACACATCTCCGAGCCCACGAG
ACGTAGAGGAATCTCGTATGCCGTCTTCTGCTTGA
>OTU_632
GGACTACAGGGGTTTCTAATCCTGTTTGCTCCCCACGCTTTCGCGCCTCAGCGTCAGTATCAGGCCAGGAAACCGCCTTC
GCCACTGGTGTTCCTCCCGATATCTACGAATTTCACCTCTACACCGGGAATTCCGTTTCCCTCTCCTGTACTCGAGCTAT
GAAGTTTCAGATGCAGTTCTTCGGTTGAGCCGAAGGATTTCACATCTGACTATCACAACCACCTACGCGCCCTTTACGCC
CAATAATTCCGAACAACGCTTGCACCCTCCGTATT
>OTU_633
GGACTACAAGGGTTTCTAATCCTGTTTGCTCCCCACGCTTTCGTGCCTCAGTGTCAGTAGCAGTCCAGTAAGTCGCCTTC
GCCACTGGTGTTCCTCCTAATATCTACGCATTTCACCGCTACACTAGGAATTCCACTTACCTCTCCTGTACTCCAGCTAA
ACAGTTTCCAAAGCAGTTCCGGGGTTGAGCCCCGGATTTTCACTTCAGACTTGCCTTGCCACCTACGCACCCTTTACACC
CAGTAAATCCGGATAACGCTTGCACCATACGTATT
>OTU_634
GGACTACAGGGGTTTCTAATCCTGTTTGCTCCCCACGCTTTCGAGCCTCAACGTCAGTTACCGTCCAGTAAGCCGCCTTC
GCCACTGGTGTTCCTCCTAATATCTACGCATTTCACCGCTACACTAGGAATTCCACTTACCCCTCCGGTACTCTAGATTG
ACAGTTTCCAATGCAGTCCCGGGGTTGAGCCCCGGCCTTTCACATCAGACTTGCCATTCCGTCTACGCTCCCTTTACACC
CAGTAAATCCGGATAACGCTTGCCCCCTACGTATT
>OTU_635
GGACTACTGGGGTTTCTAATCCTGTTTGCTCCCCACGCTTTCGAGCCTCAGCGTCAGTAATGAGCCAGTGTGTCGCCTTC
GCCACTGGTGTTCTTCCGAATATCTACGAATTTCACCTCTACACTCGGAGTTCCACACACCTCTCTCATACTCAAGACAC
CCAGTATCAAAGGCAATTCCGAGGTTGAGCCCCGGGATTTCACCCCTGACTTAAATGTCCGCCTACGCTCCCTTTACGCC
CAGTAATTCCGAGCAACGCTAGCCCCCTTCGTATT
>OTU_636
GGACTACTAGGGTTTCTAATCCCTTTCGCTCCCCTAGCTTTCGTCCCTGAGTGTCAGTGATGGCCCAGTAGCGCGCTTTC
GCCGCTGGTGTTCTTCCCAATATCTACGCATTTCACCGCTACACTGGGAATTCCCGCTACCCCTACCACACTCTAGTCGC
TCAGTTTCCACCGCCGTTACAGAGTTAAGCTCTGCGCTTTAACAGCAGACTTGAACAACCACCTGCGGACGCTTTACGCC
CAATAAATCCGGATAACGCTTGCATCCTCCGTATT
>OTU_637
GGACTACCGGGGTTTCTAATCCTGTTTGCTCCCCACACTTTCGAGCCTCAGCGTCAGTAAAAGCCCAGCAAGCCGCCTTC
GCCACTGGTGTTCCTCCTAATATCTACGCATTTCACCGCTACACTAGGAATTCCGCTTGCCTCTACTTCACTCAAGAAAA
ACAGTTTTGAATGCAGTCTGTCGGTTAAGCCCACAGTTTTCACATCCAACTTGCCTTCCCGCCTACGCTCCCTTTACACC
CAGTAATTCCGGACAACGCTCGCTCCCTACGTATT
>OTU_638
GGACTACCAGGGTATCTAATCCTGTTTGCTCCCCACGCTTTCGCGCCTCAGCGTCAGTTGCTGTCCAGCAGATCGCCTTC
GCCACTGGTGTTCCTCCTAATATCTACGCATTTCACCGCTACACTAGGAATTCCATCTGCCTCTCCAGTACTCAAGAAAA
ACAGTTTCAAATGCAGGCTGTGGGTTGAGCCCACAGTTTTCACATCTGACTTGCTTTCCCGCCTACACGCCCTTTACACC
CAGTAAATCCGGATAACGCTTGCCACCTACGTATT
>OTU_639
GGACTACCGGGGTATCTAATCCTGTTTGCTCCCCACGCTTTCGAGCCTCAACGTCAGTTACAGTCCAGTAAGCCGCCTTC
GCCACTGGTGTTCCTCCTAATATCTACGCATTTCACCGCTACACTAGGAATTCCACTTACCTCTCCTGCACTCCAGCCAC
ACAGTTTCCAAAGCAGTCCCGGGGTTGAGCCCCGGGCTTTCACTTCAGACTTGCATCGCCGTCTACGCTCCCTTTACACC
CAGTAAATCCGGATAACGCTTGCCCCCTACGTATT
>OTU_640
GGACTACCAGGGTATCTAATCCTGTTTGCTCCCCTAGCTTTCGCACCTCAGCGTCAGTAATGGCCCAGAAAGCTGCCTTC
GCCATCGGTGTTCTTCCCAATATCTGCGCATTCCACCGCTACACTGGGAATTCCACTTTCCTCTACCATACTCGAGCCTG
CCAGTTCAAGATCCGGCTTGAGGTTGAGCCCCAAGATTTAAGACCTTGCTTAACAAGCCGCCTACGCGCGCTTTACGCCC
AATAAATCCGGATAACGCTTGCTCCATACGTATTA
>OTU_641
GGACTACCGGGGTTTCTAATCCTGTTTGCTCCCCACGCTTTCGCGCCTCAGCGTCAGTATCAGGCCAGAAAATCGCCTTC
GCCACTGGTGTTCCTCCCGATATCTACGAATTTCACCTCTACACCGGGAATTCCATTTCCCTCTCCTGTACTCTAGCTGT
GTAGTTTCAAACGCAGTTCCCCGGTTAAGCCGGAGTATTTCACATCTGACTTACACAACCGCCTACGCGCCCTTTACGCC
CAATAATTCCGAACAACGCTCGCACCCTCCGTATT
>OTU_642
GGACTACTCGGGTTTCTAATCCTGTTTGCTCCCCACACTTTCGCGCCTCAGCGTCAGTAACAGTCCAGTAAGCCGCCTTC
GCCACTGGTGTTCCTCCCGATCTCTACGCATTTCACCGCTACACCGGGAATTCCGCTTACCTCTCCTGCACTCAAGCCCG
ACAGTTTTCAAAGCAGTTCCCTCCTTAAAAGAAGGACTTTCACTTCAAACTTATCAGGCCGCCTACGCGCCCTTTACGCC
CAATCATTCCGGACAACGCTTGCCCCCTACGTATT
>OTU_643
GGACTACTGGGGTTTCTAATCCTGTTTGATACCCATGCTTTTGCATTTTAGCGTCAGTAATAATATAGTTAGTCGTTTTC
ACCTATTGATTGTCTCTACAATATTTACGCATTTTACCTCTCCACTGAAAGTGCAACATACTTCTATTATACTCTTAGTT
TATTTGTTTGAAAAATAATTATGTAAAGTTGTTCTTTAGACTTTTATTTCCACATAATAAACCGCCTACATGCCCTTTAC
GCCCAGTTTTAATGAGTAACACTCATCCCCTCCGT
>OTU_644
GGACTACCGGGGTTTCTAATCCTGTTTGCTCCCCGCACCTTCGTATATCAGCGTCAATCATCGGCCAGAAACCCGCCTTC
GCCACCGGTGTTCTTCCAAATATCTACAGATTCCACCCCTACACTTGGAATTCCGGTTTCCCCTCCGTGATTCAAGTCAA
GCAGTACCCAATGCAGTTTACGAGTTGAGCTCGTAGATTTCACACCAGGCTTACCTAACCGCCTACATACCCTTTACGCC
CAATAATTCCGAACAACGCTCGCCCCTTACGTGTT
>OTU_645
GGACTACCCGGGTATCTAATCCTGTTTGCTCCCCACGCTTTCGCGCCTCACCGTCAGTTGTCGTCCAGCAATCCGCCTTC
GCCACTGGTGTTCCTCCTAATATCTACGCATTTCACCGCTACACTAGGAATTCCGATTGCCTCTCCGATACTCAAGATCA
ACAGTTTCAAATGCAGTTCACGAGTTGAGCCCGTGGATTTCACATCTGACTTGCCGACCCGGCTACACGCCCTTTACACC
CAGTAAATCCGGACAACGCTTGCCACCTACGTATT
>OTU_646
GGACTACTAGGGTTTCTAATCCTGTTCGATACCCACGCTTTCGTGCTTCAGCGTCTGTTTCACCCCAGTATGCTGCCTTC
GCAATCGGGGTTCTGCGTGATATCTATGCATTTCACCGCTACACCACGCATTCCGCATACCTCTTGTGGACTCTAGCTCT
ACAGTTTCAACGGCAGTTTCCCGGTTGAGCCGGAACATTTCACCGCTGACTTATAGGGCCGCCTACGCACCCTTTAAACC
CAATAAATCCGGATAACGCTCGCATCCTCCGTATT
>OTU_647
GGACTACACGGGTTTCTAATCCTGTTCGCTCCCCATGCTTTCGCTCCTCAGCGTCAGTTGCGGCCCAGAGACCTGCCTTC
GCCATCGGTGTTCCTCCTGATATCTGCGCATTCCACCGCTACACCAGGAATTCCAGTCTCCCCTACCGCACTCTAGTCTG
CCCGTACCCACTGCAGGCCCGAGGTTGAGCCTCGGGTTTTCGCAGCAGACGCGACAGACCGCCTACGAGCTCTTTACGCC
CAATAATTCCGGACAACGCTTGCGCCCTACGTATT
>OTU_648
GGACTACAGGGGTTTCTAATCCTGTTTGCTCCCCACGCTTTCGCACCTCAGCGTCAATACCTGTCCAGTTAGTCGCCTTC
GCCACTGGTGTTCTTCCGAATATCTACGAATTTCACCTCTACACTCGGAATTCCACTAACCTCTCCAGGATTCTAGCAAT
CTAGTTTCAAAGGCAGTTCCGGGGTTGAGCCCCGGGCTTTCACCTCTGACTTGAATCGCCGCCTACGTGCGCTTTACGCC
CAGTAATTCCGAACAACGCTAGCTCCCTCCGTATT
>OTU_649
GGACTACCAGGGTATCTAATCCTGTTTGCTACCCACGCTTTCGAGCCTCAGTGTCAGTATTATGCCAGAAGGCTGCCTTC
GCCATCGGTATTCCTCCAGATCTCTACGCATTTCACCGCTACACCTGGAATTCTACCTTCCTCTCACATACTCTAGCTCT
ACAGTTTCAGATGCAGTTCCCAGGTTAAGCCCGGGGATTTCACATCTGACTTATAGAGCCACCTACGCTCCCTTTACGCC
CAGTAATTCCGATTAACGCTTGCACCCTCTGTATT
>OTU_650
GGACTACAAGGGTTTCTAATCCTGTTTGCTACCCACGCTTTCGTTCCTCAGCGTCAGAATGAGCCCAGTAAGTCGCCTTC
GCCACCGGTATTCTTTTTAATATCTACGCATTTCACCGCTACACTAAAAATTCCACTTACCTCTACTCTTCTCAAGATAT
GCAGTTTCAAATGCTTACAGTAGTTAAGCTACTGCCTTTTACATCTGACTTGCATTTCCGCCTGCGAACCCTTTACGCCC
AGTGATTCCGGACAACGCTAGCCCCCTACGTATTA
>OTU_651
GGACTACCCGGGTATCTAATCCCGTTCGCTACCCTGGCTTTCGCATCTCAGCGTCAGACACAGTCCAGAAAGGCGCCTTC
GCCACTGGTGTTCCTCCCAATATCTACGCATTTCACCGCTACACTGGGAATTCCCCTTTCCTCTCCTGCACTCAAGCCTA
ACAGTTTCCAGCGCCATACGGGGTTGAGCCCCGCATTTTCACGCTCGACTTATTAAGCCGCCTACATGCTCTTTACGCCC
AATAATTCCGGACAACGCTCGCCACCTACGTATTA
>OTU_652
GGACTACACGGGTATCTAATCCCGTTCGCTACCCACGCTTTCGCGCCTCAGCGTCAGAAACAGGCCAGAGAGCCGCCTTC
GCCACTGGTGTTCCTCCCAATATCTACGCATTTCACCGCTACACTGGGAATTCCACTCCCCTCTCCTGCCCTCAAGTCAC
CCAGTTTCAAAGGCAGGCTACCGGTTAAGCCGGTAGTTTTCACCTCTGACTTAAATGACCGCCTACACGCCCTTTACGCC
CAGTAATTCCGGACAACGCTCGCCCCCTACGTTTT
>OTU_653
GGACTACCGGGGTATCTAATCCTGTTTGCTCCCCACGCTTTCGAGCCTCAACGTCAGTTACCGTCCAGTAAGCCGCCTTC
GCCACTGGTGTTCCTCCTAATATCTACGCATTTCACCGCTACACTAGGAATTCCGCTTACCTCTCCGGCACTCAAGCCTC
ACAGTTTCCAATGCAGTCCAGGAGTTGAGCCCCCGCCTTTCACATCAGACTTGCAAAGCCGTCTACGCTCCCTTTACACC
CAGTAAATCCGGATAACGCTTGCCCCCTACGTATT
>OTU_654
GGACTACCGGGGTTTCTAATCCTGTTTGCTCCCCATGCTTTCGAGCCTCAGCGTCAATATGGTCCCAGCTGGCTGCCTTC
GCAATAGGTGTTCTTGGAGATCTCTACGCATTCCACCGCTACACCTCCAATTCCACCAGCCTCTGACCTATTCAAGATGC
CCAGTTTTGGATGCCGCTCCGAGGTTAGGCCCCGGTTTTAAACATCCAACTTAAACATCCGCCTACGCTCCCTTTACGCC
CAGTGATTCCGAACAACACTTGCCCCCCTCGTATT
>OTU_655
GGACTACTGGGGTATCTAATCCTGTTTGCTCCCCACGCTTTCGTGCATGAGCGTCAGTTTTGCCCCAGGGGGCTGCCTTC
GCCATCGGTGTTCTTCCACATATCTACGCATTTCACTGCTACACGTGGAATTCCACCCCCCTCTGACATACTCCAGTCAG
ACAGTCACAAATGCGGTTCCCAGGTTAAGCCCGGGGATTTCACATCTGTCTTATCCAACCGCCTGCGCACGCTTTACGCC
CAGTAATTCCGATTAACGCTTGCACCCTACGTATT
>OTU_656
GGACTACTAGGGTTTCTAATCCTGTTTGCTACCCACACTTTCGAGCCTCAGCGTCAGTTAGAGCCCAGCAGGCCGCCTTC
GCCACTGGTGTTCCTCCGAATCTCTACGCATTTCACCGCTACACTCGGAATTCCGCCTGCCTCTACTCCACTCAAGATAA
ACAGTTTCAAATGCAAGTTATGGGTTAAGCCCATAATTTTCACACCTGACTTGTCTACCCGCCTGCGCTCCCTTTACACC
CAGTAATTCCGGACAACGCTTGCCACCTACGTATT
>OTU_657
GGACTACCAGGGTTTCTAATCCTGTTTGATACCCACACCTTCGCAGTTTAGCGTCAATTACGGCTTAGAAGACTGCCTTC
GCCTTCGGTATTCCTCCTGATCTCTGCGCATTCCACCGCTACACCAGGAATTCTGTCTTCCCCAACCGCATTCCAGATCT
ACAGTATCTCCTGCCGCGCAACGGGTGAGCCGTTGAATTTGACAAAAAACTTATAGATCCGCCTACCTGCCCTTTACGCC
TAGTAATTCCGGACAACGCTCGCAACCCCCGTGTT
>OTU_658
GGACTACTGGGGTTTCTAATCCTGTTTGCTACCCACGCTTTCGTTCCTCAGCGTCAGATTTGTGTCCAGTAAGTCGCCTT
CGCCACAGGTATTCCTCCTAATATCTACGCATTTCACCGCTACACTAGGAATTCCACTTACCTCTCCACTTCTCAAGAAT
TACAGTTTCAAATGCTTACATGGGTTGAGCCCATGCCTTTCACATCTGACTTGTTATTCCGCCTGCGAACCCTTTACGCC
CAGTGATTCCGGACAACGCTAGCCCCCTACGTATT
>OTU_659
GGACTACCAGGGTATCTAATCCTGTTTGATCCCCACGCTTTCGTGCATCAGCGTCAGTAATGGCCCAGTAAGCTGCCTTC
GCAATCGGTGTTCTGTGTAATATCTAAGCATTTCACCGCTACATTACACATTCCGCCTACCTTGACCACACTCAAGACTA
ACAGTATCAACGGCAGTTCTGCAGTTAAGCTGCAGGATTTCACCACTGACTTAATAGCCCGCCTACGCACCCTTTAAACC
CAATAAATCCGGATAACGCTCGCATCCTCCGTATT
>OTU_660
GGACTACTAGGGTTTCTAATCCCGTTCGCTACCCTGGCTTTCGCACCTCAGCGTCAGTTACCGTCCAGCAAGTCGCCTTC
GCCACCGATGTTCTTCCCAATATCTACGCATTTCACCGCTACACTGGGAATTCCACTTGCCTCTCCGGTACTCCAGCACC
TCAGTCTCAGCCGCATAACACGGTTAAGCCGCATCCTTTTACAGCTGACTTGAAGCACAGCCTGCGTGCCCTTTACGCCC
AGTAATTCCGGACAACGCTCGCCCCCTACGTATTA
>OTU_661
GGACTACCAGGGTTTCTAATCCTGTTTGCTCCCCACGCTTTCGCACCTGATCGTCAGTATTGGTCCAGGAGGCCGCCTTC
GCCACTGATGTTCCTTCTGATATCTACGCATTTCACTGCTACACCAGAAATTCCGCCTCCCTCTCCCATACTCTAGCAAG
CCAGTTTCGGATGCAGTTCCCAGGTTGAGCCCGGGGATTTCACACCCGACTTGGCAAGCCGACTACGTGCGCTTTACGCC
CAGTAATTCCGATTAACGCTCGCACCCTCTGTATT
>OTU_662
GGACTACCAGGGTATCTAATCCCGTTTGCTCCCCTGGCTTTCGCGCCTCAGCGTCAGTTGCTGCCCAGCAAGTCGCCTTC
GCCACCGGTGTTCTTCCCAATATCTACGCATTTCACCGCTACACTGGGAATTCCACTTGCCTCTACAGCACTCCAGCACT
GCAGTCTCAACCGCATGCCCGGGTTAAGCCCAGACATTTCACAGCTGACTTGCAGCACAGCCTGCGCGCCCTTTACGCCC
AGTAATTCCGGACAACGCTCGTCCCCTACGTATTA
>OTU_663
GGACTACTAGGGTATCTAATCCTGTTTGCTCCCCACGCTTTCGAGCCTCAGCGTCAGTTTCAGTCCAGAAAGCCGCCTTC
GCCACTGGTGTTCTTCCTAATATCTACGCATTTCACCGCTATACTAGGAATTCCGCTTTCCTCTCCTGTACTCTAGCTAC
TTAGTTCCAAATGCAATCCTACGGTTAAGCCATAGGCTTTCACATCTGGCTTAAATTGCCGTCTACTCTCCCTTTACACC
CAGTAATTCCGGATAACGCTTGCCCCCTACGTATT
>OTU_664
GGACTACCCGGGTTTCTAATCCTGTTTGCTCCCCACGCTTTCACGCATTAGCGTCAGTTGAGTTCCAGCAGATCGCCTTC
GCAATGGGTATTCCTGGTGATCTCTACGGATTTTACCCCTACACCACCAATTCCATCTGCCTCTCCCTCACTCTAGATTA
CCAGTTTCCCAAGCAGTTCTATGGTTAAGCCATAGGATTTCACAAGAGACTTGATAATCCGCCTACGCGTCCTTTACGCC
CAGTGATTCCGAGTAACGCTTGCACCCTCCGTATT
>OTU_665
GGACTACTGGGGTTTCTAATCCTGTTTGCTCCCCACGCTTTCGAGCCTCAACGTCAGTTACAGTCCAGTAAGCCGCCTTC
GCCACTGGTGTTCCTCCTAATATCTACGCATTTCACCGCTACACTAGGAATTCCACTTACCTCTCCTGCACTCCAGCCTG
ACAGTTTCCAAAGCAGTTCAGGGGTTGAGCCCCCGCATTTCACTTCAGACTTGCCATGCCGTCTACGCTCCCTTTACACC
CAGTAAATCCGGATAACGCTTGCCCCCTACGTATT
>OTU_666
GGACTACTGGGGTATCTAATCCGGTTTGCTCCCCCAGCTTTCGTCCCTCACTGTCGGACCCGTTCTGGTGAGATGCCTTC
GCCATAGGTGGTCCCACCGGGATTACAGGATTTCACTCCTACCCCCGAAGTACCCCTCACCTCTCCCGGTTCCAAGATTG
CCAGTATCCCTTGGACGCCTGACGGTTGAGCCGTCAGATTTCCCAAGAGACTTAACAACCCAGCTACGAACGCTTTAAGC
CCAATAAAAGTGGCCACCACTCGAGCCGCCGGTAT
>OTU_667
GGACTACAGGGGTTTCTAATCCTGTTTGCTCCCCACGCTTTCGTGCCTCAGTGTCAGTGTTGGCCCAGGCAGTCGCCTTC
GCCACGGATGTTCCTCCTGATCTCTACGCATTTCACTGCTACACCAGGAATTCCACTACCCTCTGCCACACTCTAGTCGC
CCAGTTTCCATCGCAATTCCCAGGTTGAGCCCAGGGCTTTCACGACAGACTTAAACAACCACCTACGCACGCTTTACGCC
CAGTAATTCCGAGTAACGCTTGCACCCTTCGTATT
>OTU_668
GGACTACTGGGGTTTCTAATCCTGTTTGCTCCCCACGCTTTCGCGCCTCAGCGTCAGTTATGAGCCAGAAAGTCGCCTTC
GCCACTGGTGTTCCTCCTAATATCTACGCATTTCACCGCTACACTAGGAATTCCACTTTCCTCTCTCACACTCAAGCTAT
ACAGTATCAGATGCAGTCTAAGGGTTGAGCCCTCACCTTTCACATCTGACTTATATTGCCGCCTACGCGCCCTTTACGCC
CAGTGATTCCGGACAACGCTTGCCCCCTACGTATT
>OTU_669
GGACTACCGGGGTTTCTAATCCTGTTTGCTCCCCACGCTGTCGTCTCTCAGTGTCAGAGATACCCCAGAAAGCTGCCTTC
GCCATGGATGTTCCAACTGATATCTATGAATTTTACCTCTACACCAGTTATTCCGCCTTCCTCTGATACTCTCAAGCTCG
CCAGTTTTAAAGGCAGTTCCCACGTTGAGCGCGGGGCTTTCACCTCTAACTTAACAAGCCACCTACAGACGCTTTACGCC
CAGTGAATCCGAGCAACATTCGCCACCTTCGTATT
>OTU_670
GGACTACAGGGGTATCTAATCCTGTTTGCTCCCCACGCTTTCGCGCCTCAGCGTCAGTTGTCGTCCAGCAGGCCGCCTTC
GCCACTGGTGTTCCTCCTAATATCTACGCATTTCACCGCTACACTAGGAATTCCGCCTGCCTCTCCGATACTCAAGAGCC
ACAGTTTCAAAAGCAGTTTATGGGTTAAGCCCATAGATTTCACTTCTGACTTGCAGCCCCGCCTACACGCCCTTTACACC
CAGTAAATCCGGACAACGCTTGCCACCTACGTATT
>OTU_671
GGACTACTGGGGTTTCTAATTCTGTTTGCTCCCCACGCTTTCGAGCCTGAACGTCAGTTACTGTCCAGTAAGCCGCCTTC
GCCACTGGTGTTCTTCCTAATATCTACGCATTTCACCGCTATACTAGGAATTCCGCTTACCTCTCCAGCACTCTAGCCAT
ACAGTTTCCAAAGCAGTTCCCAGGTTGAGCCCGGGTATTTCACTTCAGACTTGCATCGCCGTCTACGCTCCCTTTACACC
CAGTAAATCCGGATAACGCTTGCCCCCTACGTATT
>OTU_672
GGACTACCGGGGTTTCTAATCCTGTTTGCTACCCACGCTTTCGCGCCTCAGCGTCAGTTATCGTCCAGAAAGCCGCCTTC
GCCACTGGTGTTCCTCCCAATCTCTACGCATTTCACCGCTACACTGGGAATTCCACTTTCCTCTCCGACACTCAAGAACG
ACAGTTTCAGATGCACCCCCGCAGTTAAGCCACGGTATTTCACATCTGACTTGCCGCCCCGCCTACACGCCCTTTACACC
CAGTAATTCCGGACAACGCTTGCCACCTACGTATT
>OTU_673
GGACTACAGGGGTTTCTAATCCTGTTTGCTCCCCACGCTTTCGCGCCTCAGCGTCAGTTGTCAGCCAGAAAGTCGCCTTC
GCCACCGGTGTTCCTCCTGATCTCTGCGCATTTTACCGCTCCACCAGGAATTCCACTTTCCCCTCTGATACTCAAGTCAC
CCAGTTTCAGATGACCGCACAAGGTTAAGCCTTGTGTTTTCACATCTGACTTGCATGACCGCCTGCGCGCCCTTTACACC
CAGTAAATCCGGATAACGCTTGCCACCTACGTATT
>OTU_674
GGACTACCAGGGTTTCTAATCCTGTTTGCTCCCCACGCTTTCGCGCCTCAGCGTCAGTTACCGTCCAGAAAGCCGCCTTC
GCCACCGGTGTTCCTCCTAATATCTACGCATTTCACCGCTACACTAGGAATTCCGCTTTCCTCTCCGGCACTCAAGACTT
GCAGTTTTGGATGCAGCTCCACGGTTAAGCCGTGACATTTCACATCCAACTTGCATGCCCGCCTACACGCCCTTTACACC
CAGTAAATCCGGACAACGCTTGCCACCTACGTATT
>OTU_675
GGACTACCAGGGTTTCTAATCCTATTTGCTCCCCACGCTTTCGTGTCTCAGCGTCAGTAACAGCCCAGCAAGCCGCCTTC
GCCACTGGTGTTCCTTCTAATATCTACGCATTTAACCGCTACACTAGAAATTCCACTTGCCTCTACTGCACTCAAGTCTG
CCAGTTTTTAAGACGAACCGAGGTTGAGCCTCGGGCTTTAATCTTAAACTTAACAAACCGCCTACACACGCTTTACGCCC
AATAAATCCGGATAACGCTCGCCCCCTACGTATTA
>OTU_676
GGACTACTGGGGTTTCTAATCCTGTTTGCTACCCACGCTTTCGCACCTCAGCGTCAGGGTCAGTCCAGAAAGCCGCCTTC
GCCACTGGTATTCCTCCTGATTTCTACGCATTTCACCGCTACACCAGGAATTCCACTTTCCTCTCCTGCCCTCAAGATAA
CCAGTTTCAGATGCAACCCCGAGGTTGGGCCCCGGTCTTTCACATCTGACTTAATTACCCGCCTACGTGCTCTTTACGCC
CAGTAATTCCGGACAACGCTCGCCCCCTACGTCTT
>OTU_677
GGACTACACGGGTTTCTAATCCTGTTTGATCCCCACGCTTTCGTGCCTCAGCGTCAGTATCGCCTTAGTAAGCTGCCTTC
GCAATTGGTGTTCTATGTCATATCTAAGCATTTCACCGCTACACGACATATTCCGCCTACTTCAAGCGCACTCAAGATCG
TCAGTATCAATGGCAAGTCTACAGTTGAGCTGCAGGATTTCACCACTGACTTAACGACCCGCCTACGCACCCTTTAAACC
CAATGAATCCGGATAACGCTTGCACCCTTCGTATT
>OTU_678
GGACTACTGGGGTATCTAATCCCGTTTGCTCCCCTGGCTTTCGCTCCTCAACGTCAGGGGTAGACCAGAAAGCCGCCTTC
GCCACTGGTGTTCCTCCCGATATCTACGCATTTCACCGCTACACCGGGAATTCCACTTTCCTCTTCTACCCTCAAGTTCG
GAAGTCTCAACTGACCCTACCAGGTTGAGCCTGGTGATTTCACAGCTGACTTTCCGAACCGTCTACGAGCTCTTTACACC
CAATAATTCCGGACAACGCTTGCTCCTTATGTATT
>OTU_679
GGACTACTAGGGTTTCTAATCCTGTTTGCTCCCCACGCTTTCGTGCATGAGCGTCAGTGTTGACCCAGGGGGCTGCCTTC
GCCATCGGTGTTCCTCCACATCTCTACGCATTTCACTGCTACACGTGGAATTCCACCCCCCTCTGCCACACTCGAGTCCC
ACAGTCACAAACGCAGTTCCCAGGTTAAGCCCGGGGATTTCACATCTGTCTTATGGAACCGCCTGCGCACGCTTTACGCC
CAGTAATTCCGATTAACGCTCGCACCCTACGTATT
>OTU_680
GGACTACTCGGGTATCTAATCCTGTTTGCTCCCCACGCTTTCGCACCTCAGCGTCAGTAATGGACCAGTGAGCCGCCTTC
GCCACTGGTGTTCCTCCGAATATCTACGAATTTCACCTCTACACTCGGAATTCCACTCACCTCTTCCACACTCAAGACTT
CCAGTATCAAAGGCAGTTCCGGGGTTGAGCCCCGGGATTTCACCCCTGACTTAAAAATCCGCCTACGTGCGCTTTACGCC
CAGTAAATCCGAACAACGCTAGCCCCCTTCGTATT
>OTU_681
GGACTACAAGGGTTTCTAATCCTGTTTGATCCCCTTGCTTTCGCGCCTCAGCGTCAGGTCTAAGCTAGAAAGCCGCTTTC
GCCACTGGTGTTCTTCCACATATCTACGCATTTCACCGCTACTTGTGGAATTCCACTTTCTCCGCCTATCCTCAAGAGAA
GAAGTTTCAAATGCAGCTCCGAAGTTGAGCTCCGGAATTTCACATCTGACTTTCCTCCCCGCCTACGCGCCCTTTACGCC
CAATAATTCCGATTAATGCTTGCACCCTCCGTATT
>OTU_682
GGACTACTGGGGTTTCTAATCCTGTTCGCTCCCCCAGCTTTCGCGCCTCAGCGTCAGTTACGGTCCAGGAAGCCGCCTTC
GCCACTGGTGTTCCTCCCGATATCTACGCATTTCACCGCTACACCGGGAATTCCGCTTCCCTCTCCCGCACTCAAGCCCG
CCAGTTTCGAACGACCTCCCCCAGTTGAGCCAGGGGATTTCACGTCCGACTTAACAGGCCGCCTGCGCGCCCTTTACGCC
CAGTAATTCCGGACAACGCTCGCCACCTACGTATT
>OTU_683
GGACTACACGGGTATCTAATCCTGTTTGCTCCCCATGCTTTCGTGCCTCAGCGTCAGTTAAAGCCCAGCAGGCCGCCTTC
GCCACTGGTGTTCCTCCTAATATCTACGCATTTCACCGCTACACTAGGAATTCCGCCTGCCTCTACTTCACTCAAGACCA
TCAGTTTCAAATGCAGCCCCGGAGTTGAGCCCCGGTATTTCACATCTGACTTGACAGCCCGCCTACGCACCCTTTACACC
CAGTAAATCCGGACAACGCTCGCTCCCTACGTATT
>OTU_684
GGACTACCAGGGTTTCTAATCCTGTTTGCTCCCCACGCTTTCGCTCCTCAGCGTCAGTACCGGCCCAGAGTGCTGCCTTC
GCCGTTGGTGTTCCTCCTGATATCTGCGCATTTCACCGCTACACCAGGAATTCCACACTCCCCTACCGGACTCTAGTCAC
CACAGTATCGAGTGCTCCACTGGGTTGAGCCCAGATTTTTCACACTCGACTTATGGAACCGCCTACGAGCTCTTTACGCC
CAATAAATCCGGACAACGCTTGCCCCCTACGTATT
>OTU_685
GGACTACAAGGGTTTCTAATCCTGTTCGCTCCCCCAGCTTTCGCGCCTCAGCGTCAGTTGATGGCCCAGAAGACTGCCTT
CGCCATCGGTGTTCTTCCCGATATCTGCGCATTCCACCGCTACACCGGGAATTCCATCTTCCTCTACCAAACTCGAGCCT
GCCAGTTCGGAACCCGGCCGGGGGTTGAGCCCTCGGGTTAGAGGTTCCGCTTGACGGGCCGCCTACGCGCGCTTTACGCC
CAATGAATCCGGATAACGCTCGCCCCCTACGTATT
>OTU_686
GGACTACCAGGGTTTCTAATCCTGTTTGCTCCCCACGCTTTCGTGCCTCAGCGTCAGTTACAGTCCAGAAAGCCGCCTTC
GCCACTGGTGTTCCTCCTAATATCTACGCATTTCACCGCTACACTAGGAATTCCGCTTCCCTCTCCTGCACTCTAGCTAC
CCAGTTTTGAATGCACCCCCCAGGTTAAGCCCGGGTATTTCACATCCAACTTAAATAGCCGCCTGCGCACCCTTTACGCC
CAGTAATTCCGGACAACGCTCGCCCCCTACGTATT
>OTU_687
GGACTACTAGGGTTTCTAATCCTGTTTGCTCCCCACGCTTTCGCGCCTCAGCGTCAGTTGTCAGCCAGAAAGTCGCCTTC
GCCACCGGTGTTCCTCCTGATCTCTGCGCATTTTACCGCTCCACCAGGAATTCCACTTTCCCCTCTGATACTCAAGTCCC
GCAGTTTCAGATGACCTGTCAAAGTTAAGCCTTGATCTTTCACATCTGACTTGCAAGACCGCCTGCGCGCCCTTTACACC
CAGTAAATCCGGATAACGCTTGCCACCTACGTATT
>OTU_688
GGACTACAAGGGTTTCTAATCCTGTTCGCTCCCCACGCTTTCGTCCCTCAGCGTCCATCATCGCCTAGCCGGTTGCCTTC
GCTCTAGAGGTTCTTCCCGATCTCTACGCATTCCACCACTACACCGGGAATTCCACCAGCCCCTGCGTGATGCTAGCCTC
GCGGTTTCCAACGCACTCCCTCAGTTTAGCCGAGGGCTTTCACGCCAGACCTTCAAGGCCGCCTACGGACCCTTTACGCC
CAGTTATTCCGGATAACGTTCGCCACCTACGTATT
>OTU_689
GGACTACTCGGGTTTCTAATCCTGTTTGCTCCCCACGCTTTCGTGTCTCAGCGTCAGTTGTCGTCCAGTAAATCGCCTTC
GCCACTGGTGTTCCTCCCGATATCTACGCATTTCACCGCTACACCGGGAATTCCATTTACCCCTCCGACACTCAAGAGAA
ACAGTTTCAAATGCACTTTATGGGTTGAGCCCATAGTTTTCACATCTGACTTGCCTCCCCGCCTACACACCCTTTACACC
CAGTAATTCCGGATAACGCTCGCCACCTACGTATT
>OTU_690
GGACTACCCGGGTTTCTAATCCTGTTTGCTCCCCACGCTTTCGCACCTCAGCGTCAGTTGTGGACCAGTCAGCCGCCTTC
GCCACTGGTGTTCCTGCGAATATCTACGAATTTCACCTCTACACTCGCAATTCCACTGACCTCTTCCACACTCAAGACAC
CCAGTATCAAAGGCAGTTCCGAGGTTGAGCCCCGGGATTTCACCCCTGACTTAAATGTCCGCCTACGTGCGCTTTACGCC
CAGTAATTCCGAACAACGCTAGCCCCCTTCGTATT
>OTU_691
GGACTACCAGGGTATCTAATCCTGTTCGATACCCGCGCTTTCGAGCTTCAGCGTCAGTTGCGCCCCAGTGAGCTGCCTTC
GCAATCGGAGTTCTTCGTGATATCTAAGCATTTCACCGCTACACCACGAATTCCGCCCACTTTATGCGTACTCAAGGAAA
CCAGTTCGCGCTGCAGTGCAGACGTTGAGCGTCTACATTTCACAACACGCTTAACCTCCGGCCTACGCTCCCTTTAAACC
CAATAAATCCGGATAACGCCCGGACCTTCCGTATT
>OTU_692
GGACTACACGGGTATCTAATCCTGTTTGCTCCCCACACTTTCGTGCCTCAACGTCAGTTACAGTCCAGTAAGTCGCCTTC
GCCACTGGTGTTCCTCCTAATATCTACGCATTTCACCGCTACACTAGGAATTCCACTTACCTCTCCTGCACTCAAGAAAA
ACAGTTTTAGTTGCAGTTCCTCAGTTAAGCCGAGGGATTTCACAACTAACTTATCTTCCCGTCTACGCACCCTTTACACC
CAATAATTCCGGATAACGCTCGCTCCCTACGTATT
>OTU_693
GGACTACACGGGTATCTAATCCTGTTCGCTCCCCATGCTTTCGCTCCTCAGCGTCAGTTACTGCCCAGAGACCTGCCTTC
GCCATCGGTGTTCCTCCTGATATCTGCGCATTCCACCGCTACACCAGGAATTCCAGTCTCCCCTACAGCACTCAAGTTAT
GCCCGTATCGCCTGCAACCCCGCAGTTAAGCTGCGGTATTCCACAAACGACGCGACAAACCACCTACGAGCTCTTTACGC
CCAGTAATTCCGGACAACGCTCGCACCCTACGTAT
>OTU_694
GGACTACCAGGGTATCTAATCCTGTTTGCTCCCCACGCTTTCGTGCCTCAGCGTCAGTTACAGTCCAGAGAGCCGCCTTC
GCTACTGGTGTTCCTCCTAATATCTACGCATTTCACCGCTACACTAGGAATTCCACTCTCCTCTCCTGCACTCAAGTCCT
CCAGTTTCAAGAGCTTACTACGGTTAAGCCACAGCCTTTCACCACTGACTTACTAAGCCGCCTACGCACCCTTTAAACCC
AGTGATTCCGGATAACGCTTGCACCCTCCGTATTA
>OTU_695
GGACTACCGGGGTATCTAATCCTGTTCGATACCCACGCCTTCGTGCCTCAGCGTCTGTCGCACCCTAGCAGGCTGCCTTC
GCAATCGGGGTTCTGCGTGATATCTATGCATTTCACCGCTACACCACGCATTCCGCCTGCCTCTTGTGCACTCTAGCTCG
CCAGTTTCAACGGCACAGTCCAGGTTGAGCCCGAAAATTTCACCGCTGACTTGGCGTGCCGCCTACGCACCCTTTAAACC
CAATAAATCCGGATAACGCTCGCATCCTCCGTATT
>OTU_696
GGACTACACGGGTATCTAATCCTGTTTGCTACCCACGCTTTCGTACCTCAGCGTCAGATAATGGCCAGAAAGTCGCCTTC
GCCACTGGTATTCTTCCTAATATCTGCGCATTCCACCGCTACACTAGGAATTCCACTTTCCCTTCCATTTCTCAAGCTAA
ATAGTTTTAGAAGCTTACTATAGTTGAGCTATAGCCTTTGACTTCTAACTTTTCTAGCCGCCTACGTACCCTTTACGCCC
AATGATTCCGGACAACGCTCGGTCCTTACGTATTA
>OTU_697
GGACTACCAGGGTTTCTAATCCTGTTTGCTCCCCACACTTTCGCGCCTCAGCGTCAGTTGCAGTCCAGTTACCCGCCTTC
GCCACTGATGTTCCTCCCGATCTCTACGCATTTCACCGCTACACCGGGAATTCCGATAACCTCTCCTGCACTCCAGCCAC
ACAGTTTCCAAAGCAATTCCACCCTTGAAAAATGGACTTCCACTCCAGACTTGCATGGCCGCCTACGCGCCCTTTACGCC
CAATCATTCCGGACAACGCTCGCCCCCTACGTATT
>OTU_698
GGACTACTAGGGTATCTAATCCTATTTGCTACCCACGCTTTCGTGACTGAGCGTCAGTATCGATCTAGTAAGCCGCCTTC
GCCTCTGGTGTTCCTCCATATATCTACGCATTTCACCGCTACACATGGAATTCCGCTTACTTCTCTCGTACTCTAGCCAT
CCAGTTTCCAAAGCGGACAGTGGTTAAGCCACTGCATTTGACTTCAGACTTAAACGGCCGCCTGCTCACTCTTTACGCCC
AATAATTCCGGATAACGCTTGCCACCTACGTATTA
>OTU_699
GGACTACAAGGGTTTCTAATCCCGTTCGCTCCCCTGGCTTTCGAGCCTCAGTGTCAGTTGCCGTCCAGAAAGCCGCCTTC
GCCACTGGTGTTCTTCCCAATATCTACGCATTTCACCGCTACACTGGGAATTCCGCTTTCCTCTCCGGCACTCAAGATCG
ATAGTTTCCTTCCCTTCATGGGGCTGAGCCCCACGCTTTTAAGAAGGACTTACCGTCCCACCTGCGCTCCCTTTACGCCC
AATCATTCCGGACAACGCTCGCCACTTACGTATTA
>OTU_700
GGACTACAGGGGTTTCTAATCCTGTTTGCTCCCCACGCTTTCGCACCTCAGCGTCAGTATCGATCCAGTAAGCCGCCTTC
GCCACTGGTGTTCCTCCGAATATCTACGAATTTCACCTCTACACTCGGAATTCCACTTACCTCTCTCGAACTCGAGATTG
CCAGTATGAAAGGCAGTTCCAGGGTTGAGCCCTGGGATTTCACCCCTCACTTAACAATCCGCCTACGTGCGCTTTACGCC
CAGTGATTCCGAACAACGCTAGCCCCCTTCGTATT
>OTU_701
GGACTACTAGGGTTTCTAATCCTGTTTGCTCCCCACGCTTTCGTAGTTTAGTGTCAGTAACTGTCCAGTTCGCCGCCTTC
GCCTCTGGTATTCCTCCCGATCTCTACGCATTTCACCGCTACACCGGGAATTCTGCGAACCTCTCCAGCACTCTAGTTAC
GCCGTTTCCAAGGCACTTCCTGAGTTGAGCTCAGGGATTTCACCCCAGACATACGTAACCACCTACCTACCCTTTACGCC
CAATAATTCCGAGCAACGCTTGCACCCTTCGTATT
>OTU_702
GGACTACCGGGGTATCTAATCCTATTTGCTCCCCACGCTTTCGTGCCTGAGCGTCAGTTACAGACCAGGTAACCGCCTTC
GCCGCTGGTGTTCCTCCATATATCTACGCATTTTACCGCTACACATGGAATTCCATTACCCTCTTCTGCACTCTAGATTG
CCAGTATTTAAGGCTATATTGGGTTGAGCCCAACGCTTTCACCTCGAACTTAACAATCCGCCTGCGCACCCTTTACGCCC
AATAAATCCGGATAACGCTTGCCACCTACGTATTA
>OTU_703
GGACTACTAGGGTATCTAATCCTGTTTGCTCCCCACGCTTTCGTGCATGAGCGTCAGTGCAGGCCCAGGGAGCTGCCTTC
GCCATCGGTGTTCCTCCGCATATCTACGCATTTCACTGCTACACGCGGAATTCCACTCCCCTCTGCCGCACTCTAGCCGT
GCAGTCACAAATGCAGTTCCCAGGTTAAGCCCGGGGATTTCACATCTGTCTTGCACAACCGCCTGCGCACGCTTTACGCC
CAGTAATTCCGATTAACGCTCGCACCCTACGTATT
>OTU_704
GGACTACAGGGGTTTCTAATCCTGTTCGATACCCGCACTTTCGAGCATGAGCGTCAGTTACGCACCCGTCAGCTGCCTTC
GCAATCGGAGTTCTTCGCCATATCTAAGCATTTCACCGCTACACGGCGAATTCCGCCAACGTTGCGCGCACTCAAGCTGG
GCAGTTCGCGCTGCAGTGCAGACGTTGAGCGACTGCATTTCACAACACGCTTGCCCGGCGGCCTGCGCTCCCTTTAAACC
CAATAAATCCGGATAACGCCCGGACCTTCCGTATT
>OTU_705
GGACTACAGGGGTTTCTAATCCTGTTTGCTCCCCACGCTTTCGAGCCTCAGCGTCAGTTACAGTCCAGAAAGCCGCCTTC
GCCACTGGTGTTCCTCCTAATATCTACGCATTTCACCGCTACACTAGGAATTCCACTTTCCTCTCCTGCACTCAAGTCCG
CCAGTTTTGGATGCACCCCCCAAGTTAAGCCCGGGTATTTCACATCCAACTTAGTAGACCGCCTACGCTCCCTTTACGCC
CAGTAATTCCGGACAACGCTCGCCCCCTACGTATT
>OTU_706
GGACTACTGGGGTTTCTAATCCTGTTCGCTCCCCACGCTTTCGTGCCTCAGCGTCAATCCAGGTCTAGCCAGCTGCCTTC
GCAATTGGTGTTCTATGGCATATCTATGCATTTCACCGCTACATGCCACATTCCGCTGACCTCATCCTAATTCTAGCCAT
GCAGTATCAGAAGCAATTTTACGGTTGAGCCGCAAACTTTCACTCCTGACTTACAAAGCCGCCTACGCACCCTTTAAACC
CAGTAATTCCGGATAACGCTCGCACCCTCCGTATT
>OTU_707
GGACTACAGGGGTTTCTAAGCCTGTTCGCTCCCCACGCTTTCGCTCCTCAGCGTCAGGAAAGGCCCAGAGAACCGCCTTC
GCCACTGGTGTTCCTCCTGATATCTGCGCATTCCACCGCTCCACCAGGAATTCCATTCTCCCCTACCTTCCTCAAGTCAA
CCCGTATCGAAAGCACGCTCAGGGTTAAGCCCCAAGATTACACTTCCGACGCGATCAACCACCTACGAGCCCTTTACGCC
CAATAAATCCGGACAACGCTCGCACCCTACGTATC
>OTU_708
GGACTACAGGGGTTTCTAATCCTGTTTGCTACCCACGCTTTCGCGCCTCAGCGTCAGATCCGAGCCAGTAATCCGCCTTC
GCCACTGGTGTTCCTCCAGATATCTACGCATTTCACCGCTACACCTGGAATTCCGATTACCTCTCTCGGCCTCAAGCCAT
CCAGTTTCCAGTGCATGCTCCTCGTTGAGCGATGGAGATTTCACACCAGACTTAGATAGCCGCCTACGCGCTCTTTACGC
CCAATAAATCCGAACAACGCTCGCCCCCTCCGTAT
>OTU_709
GGACTACTCGGGTTTCTAATCCCGTTCGCTCCCCACGCCTTCGCACATGAGCGTCAGTACAACGCCAGGGTGCCGCTTTC
GCCTCTGGTATTCCTCCCGATATCTACGCATTCCACCACTACACCGGGAATTCTACACCCCTCTCGTTGCCTCAAGCCAA
ACAGTTTCCAACGACCCCTCCCAGTTAAGCCAGGAGATTTTACGCCAGACTTGCTTAGCCGCCTGCGTGCGCTTTACGCC
CAGTAATTCCGGATAACGCTTGTCACCTACGTATT
>OTU_710
GGACTACAAGGGTATCTAATCCTGTTTGATACCCACACCTTCGAGCATCAGTGTCAGTTGCAGTCCAGTGAGCTGCCTTC
GCAATCGGAGTTCTTCGTGATATCTAAGCATTTCACCGCTACACCACGAATTCCGCCCACCTCTACTGTACTCAAGACAA
CCAGTATCAACTGCAATTTTACGGTTGAGCCGCAAACTTTCACAACTGACTTAACTGTCCACCTACGCTCCCTTTAAACC
CAATAAATCCGGATAACGCTCGGATCCTCCGTATT
>OTU_711
GGACTACCGGGGTATCTAATCCCGTTTGATCCCCACACTTTCGCACTTCAGCGTCAGTCATAGGCCAGAAGGCCGCCTTC
GCCACCGGTGTTCTTCCCAATATCTACGCATTTCACCGCTACACTGGGAATTCCGCCTTCCTCTCCCTGACTCAAGAATA
CCAGTATCGAATGCAGTTTGGAGGTTGAGCCTCCAGATTTCACACCCGACTTAATATCCCGCCTGAATGCCCTTTACGCC
CAATAATTCCGAACAACGCTTGCATCATACGTATT
>OTU_712
GGACTACCAGGGTTTCTAATCCTGTTCGCTCCCCATGCTTTCGCTCCTCAGCGTCAGTTACGGCCCAGAGATCTGCCTTC
GCCATTGGTGTTCCTCCTGATATCTGCGCATTCCACCGCTACACCAGGAATTCCAATCTCCCCTACCGCACTCTAGTCTG
CCCGTACCCACTGCAGGCTGGAGGTTGAGCCTCCAGTTTTCACAGCAGACGCGACAAACCGCCTACGAGCTCTTTACGCC
CAATAATTCCGGATAACGCTTGCACCCTACGTATT
>OTU_713
GGACTACAGGGGTTTCTAATCCCGTTTGCTCCCCACGCTTTCGCGCCTCAGCGTCAGAACCGGACCAGTAAGCCGCCTTC
GCCACTGGTGTTCTTGCGAATATCTACGAATTTCACCTCTACACTCGCAGTTCCACTTACCTCTTCCGGTCTCAAGCCAA
ACAGTATCGAAGGCAATTCTGTGGTTGAGCCACAGGCTTTCACCCCCGACTTGAATGGCCGCCTACGCGCCCTTTACGCC
CAGTGATTCCGAGCAACGCTAGCCCCCTTCGTATT
>OTU_714
GGACTACAAGGGTATCTAATCCCATTCGCTCCCCTAGCTTTCGTCCTGTGAGTGTCAGATGCCGTCCAGTAGAGCGCTTT
CGCCACCGGTGTTCTTCCCGATCTCTACGCATTTCACCGCTACACCGGGAATTCCCTCTACCCCTACGGCTCTCTAGTCT
TTCAGTTTCCACTGCCTTTACAAAGTTGAGCTTTGCTCTTTAACAGCCGACTGGAAAAACCACCTACGGACGCTTTACGC
CCAATCATTCCGGATAACGCTTGCCTCCTCCGTAT
>OTU_715
GGACTACACGGGTTTCTAATCCTGTTTGCTCCCCACGCTTTCGTGCCTCAGCGTCAGTTATGGCTTAGCGAGCTGCCTTC
GCAATTGGTGTTCTGTGTCATATCTAAGCATTTCACCGCTACATGACACATTCCGCCCACCTCAACCATACTCAAGACTA
GCAGTATCAATGGCAGTTCCACCGTTGAGCGATGGGCTTTCACCACTGACTTACTAATCCGCCTACGCACCCTTTAAACC
CAATAAATCCGGATAACGCTTGGGTCCTTCGTATT
>OTU_716
GGACTACTCGGGTTTCTAATCCTGTTTGCTCCCCACGCTTTCGCACCTCAGCGTCAGTATCGAGCCAGTAAGCCGCCTTC
GCCACTGGTGTTCCTCCGAATATCTACGAATTTCACCTCTACACTCGGAATTCCACTTACCTCTCTCGACCTCAAGACTG
GAAGTTTTGAAGGCAGTTCCAAGGTTGAGCCCTGGGATTTCACCTCCAACTATCCAATCCGCCTACGTGCGCTTTACGCC
CAGTAATTCCGAATAACGCTAGCCCCCTCCGTATT
>OTU_717
GGACTACCGGGGTATCTAATCCCGTTCGCTCCCCTAGCTTTCGCACCTCAGCGTCAGGATATGGCCAGGAAGCCGCCTTC
GCCACGGGTGTTCCTCCTGATATCTACGCATTTCACCGCTACACCAGGAATTCCACTTCCCTCTCCAAACCTCAAGACAT
CCAGTTTTGCAGGCAGCTCCGAGGTTGAGCCTCGGGATTTCACCCACAACTTAAATGTCCGCCTACGCGCGCTTTACGCC
CAGTGAATTCGGACAACGCTCGCCCCCTACGTATT
>OTU_718
GGACTACCCGGGTTTCTAATCCTGTTTGCTCCCCACGCTTTCGTGCATGAGCGTCAGTCATGTCCCAGGGGGCTGCCTTC
GCCATCGGTGTTCTTCCAAATATCTACGCATTTCACTGCTACACTTGGAATTCCACCCCCCTCTGACAAACTCGAGTCCT
GCAGTCATAAATGCAATTCCAAGGTTAAGCCCGGGGATTTCACATCTATCTTACAGAACCGCCTGCGCACGCTTTACGCC
CAGTAATTCCGATTAACGCTTGCACCCTACGTATT
>OTU_719
GGACTACCCGGGTATCTAATCCTGTTTGCTCCCCACGCTTTCGTGACTCAGCGTCAGTTGCAGTCCAGTAAGTCGCCTTC
GCCACTGGTGTTCCTCCTAATATCTACGCATTCCACCGCTACACTAGGAATTCCACTTACCTCTCCTGCACTCAAGTTAC
GTAGTTTCAAATGCTGATATGGGTTGAGCCCATAGATTAAACATCTGACACACGTTACCGCCTACTCACCCTTTACGCCC
AGTAAATCCGGACAACGCTAGCCCCCTACGTATTA
>OTU_720
GGACTACTAGGGTTTCTAATCCTGTTTGATCCCCACGCTTTCGTGCCTCAGCGTCAGTAACAGCTTAGTAAGCTGCCTTC
GCAATCGGCGTTCTGTGGTATATCTATGCATTTCACCGCTACACACCACATTCCGCCTACCTCAACTGTACTCAAGAACG
GCAGTTTCAAAGGCAATGCTACAGTTAAGCTGCAGTATTTCACCCCTGACTTACAGTCCCGCCTACGCACCCTTTAAACC
CAATAAATCCGGATAACGCTTGCATCCTCCGTATT
>OTU_721
GGACTACTGGGGTTTCTAATCCGGTTTGCTCCCCACGCTTTCGCCCCTGAGCGTCAGGACAGGGCCAGGATGCCGCCTTC
GCCACTGGTGTTCCTCCAGATATCTACGCATTTCACCACTACACCTGGAATTCCACATCCCTCTCCCTGCCTCAAGCCTG
GCAGTTTTCGAGGCACCCTCCCAGTTGAGCCGGGAGATTTCACCTCGAACTTGCCAAGCCGCCTGCGGGCGCTTTACGCC
CAATAAATCCGGACAACGCTCGACACCTACGTATT
>OTU_722
GGACTACTCGGGTTTCTAATCCTGTTTGCTCCCCACGCTTTCGTGCATGAGCGTCAGTAACGGCCCAGAAAGCTGCCTTC
GCAATTGGTGTTCTGTGTAATATCTAAGCATTTTACCGCTACATTACACATTCCGCCTTCCTTGACCACACTCAAGAAAA
ACAGTATCAACGGCAATTCTGCAGTTAAGCTGCAGGATTTCACCACTGACTTATCTTTCCGCCTGCGCACCCTTTAAACC
CAATAAATCCGGATAACGCTCGCATCCTCCGTATT
>OTU_723
GGACTACTCGGGTATCTAATCCTGTTTGCTCCCCACACTTTCGCGCCTCAGCGTCAGTTGCAGTCCAGTTACCCGCCTTC
GCCACTGGTGTTCCTCCCGATCTCTACGCATTTCACCGCTACACCGGGAATTCCGATAACCTCTCCTGCACTCAAGCCCA
TCAGTTTCTATAGCACTTCCATCCTTGAAAAATGGACTTCCACTACTGACTTGACAGGCCGCCTGCGCGCCCTTTACGCC
CAATCATTCCGGACAACGCTCGCCCCCTACGTATT
>OTU_724
GGACTACACGGGTTTCTAATCCTGTTCGCTCCCCATGCTTTCGCTCCTCAGTGTCAGTTACAGCCCAGAGTCCCGCCTTC
GCCACCGGTGTTCCTCCTGATATCTGCGCATTTCACCGCTACACCAGGAATTCCAGACTCCCCTACTGCACTCTAGTCAG
CCCGTACCCACTGCACGCGCAACGTTAAGCGTTGCGTTTCCACAGCAGACGTGACCAACCACCTACGAGCTCTTTACGCC
CAATAATTCCGGACAACGCTCGTACCCTACGTATT
>OTU_725
GGACTACTCGGGTATCTAATCCCGTTTGCTCCCCTGGCCTTCGTGCCTCAGTGTCAGTAACTGTCCAGAGATTCGCCTTC
GCCACTGGTCTTCCTTACGATATCTACGCATTTCACTGCTACACCGTAAATTCCAATCTCCTCTCCAGTACTCAAGCACC
ACAGTATCAAGTGCAGTTTCGAGGTTGAGCCCCGAGATTTCACACCTGACTTATGGCGCCACCTACGCACCCTTTACGCC
CAATGAATCCGAACAACGCTTGAGACCTCTGTATT
>OTU_726
GGACTACTAGGGTTTCTAATCCTGTTTGCTCCCCACGCTTTCGCACCTCAGTGTCAGTATCAGTCCAGGTGGTCGCCTTC
GCCACTGATGTTCCTTCCTATATCTACGCATTTCACCGCTACACAGGAAATTCCACCACCCTCTACCATACTCTAGCCCG
CCAGTTTTAGAAGCAATTCCCAGGTTGAGCCCGGGGCTTTCACTCCTAACTTAACGAACCACCTACGCGCGCTTTACGCC
CAGTAATTCCGATTAACGCTTGCACCCTTCGTATT
>OTU_727
GGACTACTCGGGTATCTAATCCTGTTCGCTACCCACGCTTTCGCTCATCAGCGTCAGTTACTGCCCAGAGACCCGCCTTC
GCCACCGGTGTTCCTCCTGATATCTGCGCATTTCACCGCTACACCAGGAATTCCAGTCTCCCCTGCAGTACTCAAGTCTG
CCCGTATCGCCCGCAAGCTTGAGGTTGAGCCCCAAGTTTTCACGGACGACGCGACAAACCGCCTACGAGCCCTTTACGCC
CAGTAATTCCGGACAACGCTCGCACCCTACGTATT
>OTU_728
GGACTACAGGGGTTTCTAATCCTGTTTGCTCCCCACGCTCTCGCGTCTCAGCGTCAGTATAGGACCAGGAAGTCGCCTTC
GCCACCGGTGTTCCTCCTGATATCTACGAATTTCACCTCTACACCAGGAATTCCACTTCCCTCTTCCTTACTCTAGCAGG
ACAGTATCAAATGCACTTCCTGGGTTGAGCCCAGGGCTTTCACATCTGACTTATCCAGCCGCCTACACGCTCTTTACGCC
CAATGATTCCGAACAACGCTTGCACCCCCCGTATT
>OTU_729
GGACTACCCGGGTTTCTAATCCTGTTTGCTCCCCACGCTTTCGTGCCTCAGCGTCAGTTGTGCCCCAGTAAGTCGCTTTC
GCCTCCGGTGTTCCTCCTAATATCTACGCATTCCACCGCTACACTAGGAATTCCACTTACCCCTGACACACTCTAGTTCA
CCAGTTTTGGCAGTAGTTCCGGAGTTAAGCCCCGGAATTACGCTGCCAACTTGATTTACCGCCTACGCACCCTTTACGCC
CAGTCATTCCGGATAACGCTTGCATCCTACGTATT
>OTU_730
GGACTACCGGGGTTTCTAATCCTATTTGCTTCCCACGCTTTCGTGCTTCAGCGTCAGTTACAGGCCAGACAACCGCCTTC
GCCACTGGTGTTCCTCCATATATCTACGCATTTTACCGCTACACATGGAATTCCATTGTCCTCTCCTGCACTCCAGCCAG
ACAGTTTCCAAGGCTTACCGTGGTTGAGCCACGGGCTTTTACCTCAGACTTATCTCGCCGCCTACGCACCCTTTACGCCC
AATAATTCCGGATAACGCTTGCCACCTACGTATTA
>OTU_731
GGACTACTGGGGTATCTAATCCGGTTCGCGCCCCTGGCTTTCGTTACTCACCGTCAAGATCGTTCCAGTTAGACGCCTTC
GCCACAGGTGGTCCTCCCAGGATTATAGGATTTCACCCCTACCCCGGTAGTACCTCTAACCTCTCCCGACTTCAAGTCTG
ACAGTATCTTCAGCAATTCTTATAGTTAAGCTACAAGCTTTCACCAAAGACTTATCAAACCGGCTACGAACGCTTTAGGC
CCAATAAAAACAGCTACCACTTGAGCTGCCGGTGT
>OTU_732
GGACTACCCGGGTATCTAATCCTGTTCGCTCCCCACACTTTCGCTCCTCAGCGTCAGGTCATTCCCAGAGAACCGCCTTC
GCCACCGGTGTTCCTCCTGATATCTGCGCATTTCACCGCTACACCAGGAATTCCGTTCTCCCCTGAATACCTCTAGTCTG
CCCGTATCGAAAGCAAGCCAGGTGTTAAGCACCTGGTTTTCACTCCCGACGCGACAAACCGCCTACGAGCCCTTTACGCC
CAATAATTCCGGACAACGCTCGCACCCTACGTATT
>OTU_733
GGACTACAAGGGTATCTAATCCTGTTCGCTCCCCTAGCTTTCGCTCCTCAGCGTCAGTACAAGCCCAGGAAGCCGCCTTC
GCCACCGGTGTTCTTCCCGATATCTGCGCATTTCACCGCTACACCGGGAATTCCACTTCCCTCTGCTTGACTCTAGCCTG
CCAGTATCGAGTGCAATTCCTCGGTTGAGCCGAGGGCTTTCACACCCGACTTAACAGACCGCCTACGAGCTCTTTACGCC
CAGTGATTCCGGACAACGCTAGCCCCCTACGTCTT
>OTU_734
GGACTACTAGGGTTTCTAATCCTGTTTGCTACCCACGCTTTCGCACCTCAGCGTCAGTCATGATCCAGGGGGCCGCCTTC
GCCACCGGTGTTCCTCCAGATATCTACGCATTTCACCGCTACACCTGGAATTCCACCCCCCTCTATCAGACTCGAGCGCG
CTAGTATCAAATGCCATTCCCAGGTTGAGCCCAGGGGTTTCACATCTGACTTAACGGGCCGCCTACGTGCGCTTTACGCC
CAGTGATTCCGATTAACGCTTGCACCCTCCGTATT
>OTU_735
GGACTACACGGGTATCTAATCCCTTTCGCTCCCCTAGCTTTCGTCCCTCAGCGTCAGTTGTGGCCCAGTAGAGCGCCTTC
GCCACTGGTGTTCTTCCCGATATCTACGCATTTCACCGCTACACCGGGAATTCCCTCTACCCCTACCACACTCTAGCCAA
CCAGTTTCCATTGCCGATCCACAGTTGAGCTGTGGGCTTTAACAACAGACTTAATTAGCCGCCTGCGGACGCTTTACGCC
CAATAATTCCGGATAACGCTTGCCTCCTCCGTCTT
>OTU_736
GGACTACTCGGGTATCTAATCCCGTTCGCTACCCTAGCTTTCGCCTTCAGCGTCAGGAGCAGCCCAGGAGGCCGCTTTCG
CCACAGGTGTTCCTCCCGATATCTACGCATTTCACCACTACACCGGGAATTCCACCTCCCTCTGCTGTCCTCAAGCTCCG
CAGTATTGAACGACCTCCCCCAGTTAGGCCAGGGGCTTTCACGTCCAACTTACGGAACCGCCTCAACGCTCTTTACGCCC
AGTAAATCCGGATAACGCTTGCGTCCTACGTTTTA
>OTU_737
GGACTACCCGGGTATCTAATCCTGTTTGCTCCCCACGCTTTCGTGCCTCAGTGTCAGTTACAGTCCAGTAAGCCGCCTTC
GCCACTGGTGTTCCTCCTAATATCTACGCATTTCACCGCTACACTAGGAATTCCGCTTACCTCTCCTGCACTCCAGCTGA
ACAGTTTCAAATGCACTACCGGGGTTGAGCCCCGGGCTTTCACATCTGACTTGCCCTGCCACCTGCGCACCCTTTACACC
CAGTAAATCCGGATAACGCTTGCCCCCTACGTATT
>OTU_738
GGACTACTCGGGTATCTAATCCTATTTGCTCCCCACGCTTTCGTCCCTGACCGTCAGTAATAGCCTAGCAAATCGCCTTC
GCCACTGGTGTTCCTTCTAATATCTACGCATTTTACCGCTACACTAGAAATTCCATTTGCCTCTACTACACTCAAGTATA
TCAGTTTCTAGAACGAACTGGAGTTAAGCTCCAGGCTTTTATTCTAGACTTAATAAACCGGCTGCGGACGCTTTACGCCC
AATAAATCCGGATAACGCTCGCCACCTACGTATTA
>OTU_739
GGACTACCGGGGTATCTAATCCTGTTTGCTACCCACGCTTTCGTGCATGAGCGTCAGTATCGACCCAGGGGGCTGCCTTC
GCCATTGGTGTTCCTCCACATCTCTACGCATTTCACTGCTACACGTGGAATTCCACCCCCCTCTGCCGTACTCTAGTGAG
ACAGTCACAAACGCAGTTCCCAGGTTGAGCCCGGGGATTTCACGCCTGTCTTATCAAACCGCCTGCGCACGCTTTACGCC
CAGTAATTCCGATTAACGCTCGCACCCTACGTATT
>OTU_740
GGACTACTGGGGTATCTAATCCTGTTTGCTCCCCGCACCTTCGCACCTCAGCGTCAGTTATCTGCCAGAAACTTGCCTTC
GCCATTGGTATTCTTCCAAATATCTACAGATTTCACCCCTACACTTGGAATTCTAGTTTCCCCTCAGTAACTCTAGTCTT
GCAGTTCCCAATGCAGTTCCGCAGTTAAGCTGCGGGATTTCACATCAAGCTTGCAAATCCGCCTACATGCCCTTTACGCC
CAATAATTCCGAACAACGCTCGCAACTTACGTGTT
>OTU_741
GGACTACTGGGGTTTCTAATCCTGTTTGCTCCCCACGCTTTCGTACCTCAGCGTCAGTTACAGTCCAGAAAGCCGCCTTC
GCCACCGGTGTTCCTCCTAATATCTACGCATTTCACCGCTACACTAGGAATTCCGCTTTCCTCTCCTGCACTCAAGTCTG
TCAGTTCGCAAGGCTTACAATGGTTAAGCCACTGCCTTTCACCTTGCGCTTAGCAAACCGCCTACGTACTCTTTACGCCC
AATAATTCCGGACAACGCTTGCCCCCTACGTATTA
>OTU_742
GGACTACTGGGGTTTCTAATCCTGTTCGATCCCCACGCTTTCGTGCCTCAGCGTCAATGAACCCCTCGTGAGATGCCTTC
GCAATCGGTGTTCTGAGTAATATCTATGCATTTCACCGCTACACTACTCATTCCTCCCACGGCGGAATCATTCTAGCCAG
ACAGTATCAACGGCACTTCCAGAGTTGAGCCCTGGTCTTTCACCGCTGACTTACCTTGCCGCCTACGCACCCTTTAAACC
CAATAAATCCGGATAACGCTCGCATCCCCCGTATT
>OTU_743
GGACTACTCGGGTTTCTAATCCCGTTCGCTCCCCTAGCTTTCGCGTCTGAGCGTCAGGAGCGGCCCAGGAGGCCGCCTTC
GCCACTGGTGTTCCTCCCGATATCTACGCATTTCACCACTACACCGGGAATTCCACCTCCCTCTTCCGCCCTCTAGCCTG
GCAGTATTGAACGTCCTCTCCCAGTTGAGCCGGGAGCTTTCACATCCAACTTACCAAGCCGCCTGCACGCGCTTTACGCC
CAGTGAATTCGGATAACGCTAGGCTCCTACGTTTT
>OTU_744
GGACTACAAGGGTTTCTAATCCCTTTCGCTCCCCTGGCCTTCGTGCCTCAGCGTCAGTTAATGTCCAGGAACCCGCCTTC
GCCACGAGTGTTCCTCTCGATATCTACGCATTTCACTGCTACATCGAGAATTCCGGTTCCCCCTCCATTACTCTAGTCTC
GCAGTATCATGTGCAATCCAGGGGTTGAGCCCCTGCCTTTCACACACGACTTACGAAACAGCCTACGCACGCTTTACGCC
CAGTGATTCCGAACAACGCTTGAGACCTCTGTATT
>OTU_745
GGACTACTAGGGTATCTAATCCTGTTTGCTACCCACGCTTTCGTGCATGAGCGTCAGTATTGGCCCAGGGGGCTGCCTTC
GCCATTGGTGTTCCTCCACATCTCTACGCATTTCACTGCTACACGTGGAATTCCACCCCCCTCTGCCATACTCTAGCCTT
CCAGTCACAAGCGCAGTTCCCAGGTTGAGCCCGGGGATTTCACGCCTGTCTTAAAAAACCGCCTGCGCACGCTTTACGCC
CAGTAATTCCGATTAACGCTCGCACCCTACGTATT
>OTU_746
GGACTACAGGGGTTTCTAATCCTGTTTGATACCCGCACCTTCGAGCCTCAGCGTCAGTAACGCTCCGGACGGCTGCCTTC
GCAATCGGAGTTCTTCGTGATATCTAAGCATTTCACCGCTACACCACGAATTCCACCGTCCTCGTGCGCACTCAAGAGAA
CCAGTTTCAACTGCACGACCACGGTTGGGCCGTGGCTTTTCACAACTGACTTGACTCCCCGCCTACGCTCCCTTTAAACC
CAATAAATCCGGATAACGCCTGGACCTTCCGTATT
>OTU_747
GGACTACTAGGGTTTCTAATCCCGTTTGCTACCCTAGCTTTCGCGTCTGAGCGTCAGAAGTGGTCCAGGAGGCCGCTTTC
GCCACTGGTGTTCCTCCGGATATCTACGCATTTCACCACTACACCCGGAATTCCACCTCCCTCTACCACTCTCAAGTCTG
GAAGTTTTGAACGACCTCTCCCAGTTGAGCCAGGAGCTTTCACATCCAACTTTCCAAACCGCCTGCACGCGCTTTACGCC
CAGTAAATCCGAATAACGCTTGCCTCCTACGTGTT
>OTU_748
GGACTACCGGGGTATCTAATCCTGTTCGCTCCCCACGCTTTCGTGCCTCAGCGTCAGTAATAGCTTGGAAAGCTGCCTTC
GCAATCGGTGTTCTGTGTGATATCTAAGCATTTCACCGCTACACCACACATTCCGCCTTCCGCAACTACACTCTAGTCTC
TCAGTATCAGAGGCAATTTCGACGTTGAGCGTCGAGCTTTCACCTCTAACTTAAAAAACAGCCTACGCACCCTTTAAACC
CAATAAATCCGGATAACGCTCGGATCCTCCGTATT
>OTU_749
GGACTACTAGGGTTTCTAATCCTGTTTGCTCCCCACGCTTTCGAGCCTCAGCGTCAGTAATGTCCCAGTAGGTCGCCTTC
GCTTCTGGTATTCCTTCCAATATCTACGGATTTTACCCCTACACTGGAAATTCCACCTACCCCTTCCATACTCTATTTTA
TCAGTTTCCTGAGCAGTTCTGCAGTTAGGCTGCAGGCTTTCACTCAAGACTTAATAAAACGCCTACGCTCCCTTTACGCC
CAGTGATTCCGAGTAACGCTTGCACCCCCCGTATT
>OTU_750
GGACTACTGGGGTTTCTAATCCTGTTTGCTCCCCACACTTTCGTGTCTCAGCGTCAGGTATCGTCCAGTAACTCGCCTTC
GCCACTGGTGTTCCTCCCGATATCTACGCATTTCACCGCTACACCGGGAATTCCAGTTACCTCTCCGACCCTCAAGAACC
ACAGTTTCAAATGCAAGCTATGAGTTGAGCCCATAGTTTTCACATCTGACTTGCAGTCCCGCCTACACACCCTTTACACC
CAGTAAATCCGGATAACGCTCGCCACCTACGTATT
>OTU_751
GGACTACTGGGGTTTCTAATCCTGTTTGCTCCCCACGCTTTCGCGTCTCAGCGTCAGTACCGTCCCAGCGAGCTGCCTTC
GCCATTGGTGTTCCTCCTGATATCTGCGCATTTCACCGCTACACCAGGAATTCCACTCGCCTCTTCCGGACTCGAGCTTG
ACAGTATCCATCGGCATTCCAGGGTTGAGCCCTGGACTTTCACAACAGACTTATCAAGCCGCCTACACGCGCTTTACGCC
CAATGATTCCGGACAACGCTTGCCCCCTACGTATT
>OTU_752
GGACTACACGGGTATCTAATCCTGTTTGCTACCCATGCTTTCGTGCCTCAGCGTCAGTTAAGGCCCAGCAGGCCGCCTTC
GCCACTGGTGTTCCTCCCGATCTCTACGCATTTCACCGCTACACCGAGAATTCCGCCTGCCTCTACCTCACTCAAGACCC
ACAGTTTCAATAGCAGTTCCAGGGTTAAGCCCTGGGATTTCACTACTGACTTGCAGATCCGCCTACGCACCCTTTACACC
CAGTAAATCCGGACAACGCTTGCTCCCTACGTATT
>OTU_753
GGACTACCCGGGTTTCTAATCCTGTTTGCTCCCCACACTTTCGTGCTTTAGCGTCAGTTTTGAGCCAGATAACTGCCTTC
GCCATTGGTGTTCTATCTGGTATCTACGCATTTCACTGCTACACCAGATATTCCATTATCCTCTCTCAAACTCAAGACTT
GCAGTATCAAAGGCAGCACCAAAGTTAAGCTTTGGGATTTCACCTCTGACTTACAAATCCACCTGAGCACCCTTTACACC
CAGTAAATCCGGACAACGCTTGCCCCCTACGTATT
>OTU_754
GGACTACCGGGGTTTCTAATCCTGTTTGCTCCCCACGCTTTCGCGCCTCAGCGTCAGTTGTCGTCCAGCAGGCCGCCTTC
GCCACTGGTGTTCCTCCTAATATCTACGCATTTCACCGCTACACTAGGAATTCCGCCTGCCTCTCCGATACTCAAGGGAT
ACAGTTTCAAATGCAGTTTGGGGGTTGAGCCCCCAGATTTCACATCTGACTTGCATCTCCGCCTACACGCCCTTTACACC
CAGTAAATCCGGACAACGCTTGCTCCCTACGTATT
>OTU_755
GGACTACCGGGGTTTCTAATCCTATTTGCTCCCCACGCTTTCGGGACTGAGCGTCAGTTGCACCCCAGACCGCCGCCTTC
GCCACTGGTGTTCCTCCATATATCTACGCATTTCACCGCTACACATGGAATTCCGCGATCCTCTGATGCTCTCTAGCTGT
GCGGTTTCCACGGCTTACCGAAGTTTAGCTTCGGGCTTTCACCGCAGACCTGCACTGCCGCCTGCTCCCTCTTTACGCCC
AATGATTCCGGATAACGCTCGCCACCTACGTATTA
>OTU_756
GGACTACTGGGGTTTCTAATCCTGTTTGCTCCCCCAGCTTTCGTGCCTCAGCGTCAGTTGCAGTCCAGAAAGCCGCCTTC
GCCACCGGTGTTCCTCCCGATATCTACGCATTTCACCGCTACACCGGGAATTCCGCTTTCCTCTCCTGCACTCAAGCCAA
CCAGTTTTGAATGCACATCCCCGGTTGAGCCGGGACCTTTCACATCCAACTTAACTGGCCGCCTACGCACCCTTTACGCC
CAGTGATTCCGGACAACGCTCGCCCCCTACGTATT
>OTU_757
GGACTACCGGGGTATCTAATCCTGTTTGATCCCCGCGCTTTCGTGCCTCAGCGTCAGTTACGAGCCAGATGACCGCCTTC
GCCACCGGTGTTCCTCCTGATATCTACGCATTTCACCGCTACACCAGGAATTCCATCATCCTCTCTCGCACTCAAGCCCT
GCCGTATCAAAGGCACCCTCCGGGTTAAGCCCGGATATTTCACCTCTGACGCACAAGGCCGCCTACGCACCCTTTATACC
CAGTAAATCCGGACAACGCTCGGGTCCTACGTATT
>OTU_758
GGACTACTCGGGTTTCTAATCCTGTTTGCTCCCCACGCTTTCGAGCCTCAACGTCAGTTACTGTCCAGCAAGCCGCCTTC
GCCACTGGTGTTCCTCCTAATATCTACGCATTTCACCGCTACACTAGGAATTCCGCTTGCCTCTCCAGCACTCCAGCCGT
ACAGTTTCCAAAGCAGTCCCGGGGTTGAGCCCCGGGCTTTCACTCCAGACTTGCACAGCCGTCTACGCTCCCTTTACACC
CAGTAAATCCGGATAACGCTTGCCCCCTACGTATT
>OTU_759
GGACTACCAGGGTTTCTAATCCTGTTTGCTCCCCACGCTTTCGCGCCTCAGCGTCAGTTACTGTCCAGAAAGCCGCCTTC
GCCACTGGTGTTCCTCCTAATATCTACGCATTTCACCGCTACACTAGGAATTCCGCTTTCCTCTCCAGCACTCAAGAAAC
ATAGTTTCAGATGCAGTTCCGAAGTTGAGCCCCGGAGTTTCACATCTGACTTACATTCCCGCCTACACGCCCTTTACACC
CAGTAAATCCGGACAACGCTCGCCACCTACGTATT
>OTU_760
GGACTACAGGGGTTTCTAATCCTGTTTGCTCCCTTAGCTTTCGTGTATGAGCGTCAGGAATATGTTAGGAAGCCGTCTTC
ACCGCTGGTGTTCCTCCCGATATCTACGCATTTCACCGCTACACCGGGAATTCCACTTCCCTCCCATATCCTCTATCCTT
CCAGTATTGACTGCAATTCAGAGGTTGAGCCTCATGGATTTCACAATCAACTTAAAAGGAAGCCTGCACACCCTTTACAC
CCAGTAATTCCGGACAACGCTAGCCCCCTACGTAT
>OTU_761
GGACTACTGGGGTTTCTAATCCTGTTTGCTCCCCACGCTTTCGCACCTCAGCGTCAGTATCGGACCAGTTAGCCGCCTTC
GCCACTGGTGTTCTTCCCAATATCTACGAATTTCACCTCTACACTGGGAATTCCACTAACCTCTTCCGATCTCTAGACTA
CCAGTATCAAAGGCAGTTCCGGAGTTGAGCTCCGGGATTTCACCCCTGACTTAATAGCCCGCCTACGTGCGCTTTACGCC
CAGTAATTCCGAACAACGCTAGCCCCCTTCGTATT
>OTU_762
GGACTACCCGGGTATCTAATCCTGTTTGATCCCCACGCTTTCGTGCCTGAGCGTCTATAACAAATTCGTAACCTGTCTTC
ACGATCGGTGTTCTGTGTTATATCTATGCATTTCACCGCTACATAACACATTCCAGCTACGTCATTTGTATACTAGTCTA
ACAGTATCAATGGCACGATACATGTTAAGCATGTAAATTTCACCACTGACTTATTAGTCCGCCTGCGCACCCTTTAAACC
CAATAAATCCGGATAACGCTTGCATCCTCCGTATT
>OTU_763
GGACTACTAGGGTATCTAATCCTGTTTGATCCCCACGCTTTCGTGCATCAGTGTCAATATATGTGTAGCCAGCTGCCTTC
GCAATTGGTGTTCTATGTCATATCTAAGCATTTCACCGCTACATGACATATTCCGCTGACCTCCACAATATTCAAGACAA
ATAGTATCAATGGCAGTTTTCGGGTTAAGCCCAAAGATTTCACCACTGACTTACCTGCCCACCTACGCACCCTTTAAACC
CAGTGAATCCGGATAACGCTTGCACCCTCCGTATT
>OTU_764
GGACTACTCGGGTTTCTAATCCTGTTTGCTACCCACGCTTTCGTGCCTCAGCGTCAAAACAGGCCCAGGAGGTTGCCTTC
GCCATCGGTGTTCTTCCAGATATCTACGCATTTCACCGCTACACCTGGAGTTCCGCCTCCCTCTACCGTTTTCTAGTCTG
ACAGTATCGACTGCAATTCCCAGGTTGAGCCCGGGGCTTTCACAATCGACTTATCAAACCGCCTACGCACGCTTTACGCC
CAGTAAATCCGATTAACGCTAGCACCCTCTGTATT
>OTU_765
GGACTACACGGGTTTCTAATCCTATTTGCTCCCCACGCTTTCGTGCCTCAGCGTCAGTGTTGGCCCAGCAAGTCGCCTTC
GCCACTGATGTTCCTTTTAATATCTACGCATTTAACCGCTACACTAGAAATTCCACTTGCCTCTACCATACTCAAGGTTA
ACAGTTTTGGTGGCGAACCGAAGTTAAGCTTCGGGCTTAGACCACCAACTTATTAATCCGCCTACGCACCCTTTACACCC
AATAAATCCGGATAACGCTCGCTCCCTACGTATTA
>OTU_766
GGACTACACGGGTATCTAATCCTGTTTGCTCCCCACGCTTTCGAGCCTCAACGTCAGTTACCGTCCAGTAAGCCGCCTTC
GCCACTGGTGTTCCTCCTAATATCTACGCATTTCACCGCTACACTAGGAATTCCGCTTACCTCTCCGGCACTCAAGACTG
GCAGTTTCCAATGCAGTCCAGGGGTTGAGCCCCTGCTTTTCACATCAGACTTGCTAATCCGTCTACGCTCCCTTTACACC
CAGTAAATCCGGATAACGCTTGCCCCCTACGTATT
>OTU_767
GGACTACAAGGGTATCTAATCCTGTTTGCTCCCCATGCTTTCGTACCTCAGTGTCAGTATTAGGCCAGATGGCTGCCTTC
GCCATCGGTATTCCTCCAGATCTCTACGCATTTCACCGCTACACCTGGAATTCTACCATCCTCTCCCATACTCTAGTCTC
CCAGTATCGAATGCAATTCCTAAGTTAAGCTCAGGGATTTCACATCCGACTTAAAAGACCACCTACGCACGCTTTACGCC
CAGTAAATCCGATTAACGCTTGCACCCTCTGTATT
>OTU_768
GGACTACCCGGGTATCTAATCCCGTTCTCTCCCCTGGCTTTCGCATCTCAGCGTCAGGAATGGTCCAGAGAGCCGCTTTC
GCCACTGGTGTTCCTCCAGATATCTACGCATTTCACCGCTACACCTGGAATTCCGCTCTCCTCTACCACCCTCCAGCCGA
CTAGTTTCGAATGACCTCTCCCAGTTAAGCCAGGAGCTTTCACATCCGACTTGATCGACCGCCTACATGCGCTTTACGCC
CAGTAAATCCGGATAACGCTCGGCCCCTACGTATT
>OTU_769
GGACTACACGGGTTTCTAATCCTGTTTGCTCCCCACGCTTTCGTCCCTGAGCGTCAGAATAGTCTTCGTCAGCTGCTTTC
GCTATCGGTGTTCTGTGACATATCTATGCATTTCACCGCTACTTGTCACATTCCGCCAACGCCAAACTTTCTCTAGTCAG
GCAGTTTCTGTAGCACGACCGGGGTTAAGCCCCGGTTTTTCACTACTGACTTACCTGTCCGCCTGCGGACCCTTTAAACC
CAATAATTCCGGATAACGCTCGCATCCTCCGTATT
>OTU_770
GGACTACCAGGGTTTCTAATCCTGTTTGCTCCCTACGCTTTCGCGCCTCAGCGTCAGTTAATGTCCAGCAGGCCGCCTTC
GCCACTGGTGTTCCTCCGTATATCTACGCATTTCACCGCTACACACGGAATTCCGCCTGCCTCTCCATCACTCAAGACCC
ACAGTTTCAAGTGCAGTTCCAGGGTTGAGCCCTGGAATTTCACACCTGACTTGTAGGCCCGCCTACACGCCCTTTACACC
CAGTAAATCCGGATAACGCTTGCCACCTACGTATT
>OTU_771
GGACTACTCGGGTTTCTAATCCTGTTTGCTCCCCACGCTTTCGCGCCTCAGCGTCAGTTGTCGTCTAGAAAGTCGCCTTC
GCCACCGGTGTTCTTCCTAATCTCTACGCATTTCACCGCTACACTAGGAATTCCACTTTCCCCTCCGACACTCCAGCCCT
GCAGTTTCCATCCCCTCATGGGGTTAAGCCCCACGCTTTTAAGATGGACTTGCACGGCCGCCTGCGCGCGCTTTACGCCC
AATAATTCCGGACAACGCTTGCCACCTACGTATTA
>OTU_772
GGACTACAAGGGTTTCTAATCCTGTTTGCTCCCCTAGCTTTCGTGCCTCAGTGTCAGGTGTTGTCCAGGGACTCGCCTTC
GCCACCGGTGTTCCTCTCGATATCTACGCATTTCACTGCTACACCGAGAATTCCAGTCCCCCCTCCAAACCTCTAGCAAG
ATAGTATTCAATGCCTTTTCCGGGTTGAGCCCGGAGATTTCACACCGAACTTACCTCACCACCTACGCACCCTTTACGCC
CAGTGAATCCGAACAACGCTTGGGACCTCTGTATT
>OTU_773
GGACTACCAGGGTTTCTAATCCTGTTTGATCCCCACGCTTTCGTGCCTGAGCGTCGGTTAAAGCCTAGCGGACTGCCTTC
GCAATCGGAGTTCTGCAAGGTATCTATGCATTTCACCGCTACACCTTGCATTCCATCCGCCTCGACTTCACCCAAGAAAC
CCAGTATCGAAGGCACTGCGATTGTTGAGCAACCGTCTTTCACCCCCGACTTAAGCTTCCGCCTGCGCACCCTTTAAACC
CAATGAATCCGGACAACGCTGGCACCCTCCGTATT
>OTU_774
GGACTACTCGGGTTTCTAATCCTGTTCGCTCCCCATGCTTTCGCTTCTCAGCGTCAGTTATGGCCCAGAGACCTGCCTTC
GCCATCGGTGTTCCTCCTGATATCTGCGCATTTCACCGCTACACCAGGAATTCCAGTCTCCCCTACCACACTCTAGCCTG
CCCGTACCCACCGCACGCCCAGAGTTAAGCCCTAGGTTTTCACGGCAGACGCGACAAACCGCCTACAAGCTCTTTACGCC
CAATAATTCCGGACAACGCTCGCACCCTACGTATT
>OTU_775
GGACTACCAGGGTTTCTAATTCTGTTTGCTACCCACACTTTCGTGCCTCAGCGTCAGTTAAAGCCCAGTAGGCCGCCTTC
GCCACTGGTGTTCCTCCCGATCTCTACGCATTTCACCGCTATACCGGGAATTCCGCCTACCTCTACTTCACTCAAGACTC
ACAGTTTCTACCGCAGTCCGCGGGGTTAAGCCCCGGGATTTCACGGCTGACTTGCAAGCCCGCCTACGCACCCTTTACAC
CCAGTAATTCCGGACAACGCTTGCTCCCTACGTAT
>OTU_776
GGACTACTGGGGTATCTAATCCTGTTTGCTCCCCACGCTTTCGAGCCTCAGCGTCAGTAAAGGCCCAGTAAGCCGCCTTC
GCCACCGATGTTCCTCCTGATCTCTACGCATTTCACCGCTACACCAGGAATTCCGCTTACCTCTACCTCACTCAAGAACA
ACAGTTTCAAATGCAGTCTATGGGTTGAGCCCATAGTTTTCACATCTGACTTGCCATCCCGCCTACGCTCCCTTTACACC
CAGTAATTCCGGACAACGCTCGCTCCCTACGTATT
>OTU_777
GGACTACTGGGGTTTCTAATCCCGTTCGCTCCCCTGGCTTTCGTGCCTCAGCGTCAGTTATTCCCCAGTGTGGCGCTTTC
GCCTCCGGTGTTCCTGCCAATATCAACACATTTCACCGCTCCACTGGCAGTTCCCCACACCCCTGAAATACTCCAGCAAA
TCAGTTTCAAGCGCAATGCCTCAGTTGAGCTCAGGCCTTTCACACCTGACTTGATTTGCCGCCTACGCACCCTTTAAGCC
CAGTGATTCCGAATAACGTTCGCACAGTACGTGTT
>OTU_778
GGACTACCCGGGTTTCTAATCCTGTTTGCTCCCCACGCTTTCGTGCCTGAGCGTCAGTGTTAGCCCAGGGGGCTGCCTTC
GCCATCGGTGTTCCTCCGCATCTCTACGCATTTCACTGCTACACGCGGAATTCCACCCCCCTCTGCCACACTCAAGCCCG
CCAGTTTCCAATGCCATTCCCAGGTTGAGCCCGGGGCTTTCACATCAGACTTAACGAACCGCCTGCGCACGCTTTACGCC
CAGTAATTCCGATTAACGCTCGCACCCTACGTATT
>OTU_779
GGACTACAGGGGTATCTAATCCTGTTCGCTCCCCTAGCTTTCGTCTCTCAGCGTCAGGTGCGTACCAGGGAGCCGCCTGC
GCCACTGGTGTTCCTCCCGATATCTGCGCATTTTACCGCTACACCGGAAATTCCGCTCCCCTCTCACGCCCTCTAGTCAA
GCAGTATTGAATGGCCTCTCCGAGTTAAGCCCAGAGCTTTCACATCCAACTTGCTCATCCGCCTACAGACGCTTTACGCC
CAGTAAATCCGGATAACGCTCGCGTCCTACGTATT
>OTU_780
GGACTACCCGGGTTTCTAATCCTGTTTGCTCCCCACGCTTTCGCGCCTCAGCGTCAGTTGTCGTCCAGCAAGCCGCCTTC
GCCACTGGTGTTCCTCCTAATATCTACGCATTTCACCGCTACACTAGGAATTCCGCTTGCCTCTCCGATACTCAAGGGCT
ACAGTTTCAAATGCAGTTTCCGGGTTAAGCCCGGAGATTTCACATCTGACTTGCAGCTCCGCCTACGCGCCCTTTACACC
CAGTAATTCCGGACAACGCTTGCCACCTACGTATT
>OTU_781
GGACTACCAGGGTTTCTAATCCCGTTCGCTCCCCACGCTTTCGCGCCTCAGCGTCAGTGCTGGGCCAGTGTGCCGCCTTC
GCCACCGGTGTTCTTCCTGATATCTACGCATTCCACCGCTACACCAGGAATTCCGCACACCTCTCCCGCACTCAAGCAAG
GCAGTTTCGAACGCAGTTCCACGGTTGAGCCGTGGGATTTCACATTCGACTTGCCAAGCCGCCTACACGCCCTTTACGCC
CAATGATTCCGGACAACGCTTGCTCCCCCCGTATT
>OTU_782
GGACTACTAGGGTATCTAATCCTATTTGCTCCCCACGCTTTCGTGCATGAGCGTCAGTTACAGGCCAGGCAACCGCCTTC
GCCACTGGTGTTCCTCCATATATCTACGCATTTTACCGCTACACATGGAATTCCATTGCCCTCTCCTGTACTCTAGTCTG
TCAGTTTCTAAGGCTATATGGGGTTAAGCCCCACGCTTTCACCTTAAACTTAACAAACCGCCTGCGCACCCTTTACGCCC
AATAATTCCGGATAACGCTCGCCACCTACGTATTA
>OTU_783
GGACTACCGGGGTTTCTAATCCTGTTTGCTCCCCACACTTTCGCGCCTCAGCGTCAGTTACAGTCCAGTAAGTCGCCTTC
GCCACTGGTGTTCCTCCCAATCTCTACGCATTTCACCGCTACACTGGGAATTCCACTTACCTCTCCTGCACTCTAGCTAT
GCAGTATCCAAAGCAATTCCCACCTTAAAAGCAGGACTTTCACTCCAGACTTACTTAGCCGCCTACACGCCCTTTACGCC
CAATCATTCCGGACAACGCTTGCCCCCTACGTATT
>OTU_784
GGACTACCGGGGTTTCTAATCCTGTTTGCTACCCACGCTCTCGCGTCTCAGCGTCAGTATAGGGCCAGGAAGTCGCCTTC
GCCACCGGTGTTCCTCCTGATATCTACGAATTTCACCTCTACACCAGGAATTCCACTTCCCTCTCCCCTACTCTAGCCAG
GCAGTTTCAAATGCACTTCCCGGGTTAAGCCCGGGGCTTTCACATCTGACTTACCAAGCCGCCTACACGCTCTTTACGCC
CAATAATTCCGAACAACGCTTGCACCCCCCGTATT
>OTU_785
GGACTACAGGGGTTTCTAATCCCGTTTGCTCCCCTGGCTTTCGCGCCTCAGCGTCAGTTACTGTCCAGCAAGCCGCCTAC
GCCACCGGTGTTCCTCCCAATATCTACGCATTTCACCGCTACACTGGGAATTCCGCTTGCCTCTACAGTACTCGAGCACT
ACAGTTTCAACCGCACTCATGGGGTAAGCCCATGATTTTAACAGCTGACTTGTAACGCAGCCTGCGCGCCCTTTACGCCC
AGTAATTCCGGACAACGCTCGTCCCCTACGTATTA
>OTU_786
GGACTACTCGGGTTTCTAATCCTGTTTGCTACCCACGCTTTCGCTCCTCAGTGTCAGTACCGGCCCAGAGCGCCGCCTTC
GCCGCTGGTGTTCCTCCTGATATCTGCGCATTTCACCGCTACACCAGGAATTCCACGCTCCCCTACCGGACTCTAGCCAA
AGCAGTATCGGGTGGAGACCCAGGTTGAGCCTGGGGATTTGACACCCGACTTACTTAGCCACCTACGAGCTCTTTACGCC
CAATAAATCCGGACAACGCTTGCCCCCTACGTGTT
>OTU_787
GGACTACAAGGGTTTCTAATCCTGTTTGCTCCCCACGCCTTCGAGCCTCAACGTCAGTTACAGTCCAGTAAGCCGCCTTC
GCCACTGGTGTTCCTCCTAATATCTACGCATTTCACCGCTACACTAGGAATTCCACTTACCTCTCCTGCACTCTAGCTAG
ACAGTTTCCAAAGCAGTTCCAGGGTTAAGCCCTGGCATTTCACTTCAGACTTGCCATGCCGTCTACGCTCCCTTTACACC
CAGTAAATCCGGATAACGCTTGCCCCCTACGTATT
>OTU_788
GGACTACCGGGGTATCTAATCCCTTTCGCTCCCCTAGCTTTCGTCCCTCAGTGTCAGTGCAGGTCCAGTCAGGCGCTTTC
GCCACCGGTGTTCTTCCCAATATCTACGCATTTCACCGCTACACTGGGAATTCCCCTGACCCCTGCCGCACTCTAGTCAT
CCAGTTTCCACTGCTGATATGCGGTTAAGCCGCACGCTTTAACAGCAGACTTGAATAACCACCTACGGACGCTTTACGCC
CAATAATTCCGGATAACGCTTGCATCCTCCGTATT
>OTU_789
GGACTACCAGGGTTTCTAATCCTGTTCGCTCCCCACACTTTCGTCCCTCAGCGTCAGTTAAGACTTAGTAACCTGCCTTC
GCTATCGGTGTTCTGTGTAATATCTAAGCATTTCACCGCTACACTACACATTCCAGCTACTTCAACCTCACTCAAGACTT
GCAGTATCAAAGGCAGTTCGACAGTTAAGCTGCCGGCTTTCACCCCTGACTTACAAGCCCGCCTGCGGACCCTTTAAACC
CAATGAATCCGGATAACGCTTGCACCCTCCGTATT
>OTU_790
GGACTACACGGGTTTCTAATCCCGTTTGCTCCCCACGCTTTCGCTCCTCAGCGTCAGATGCAGGCCAGTAACTCGCCTTC
GCCACTGGTGTTCCTCCCGATATCTACGCATTTCACCGCTACACCGGGAATTCCAGTTACCTCTCCTGCCCTCAAGAAGC
GCCGTATCTGGGAAAGCCACACGGTTGAGCCGTGAGATTTCCTCCCAGACGCGCGCTCCCGCCTACGAGCTCTTTACGCC
CAGTAATTCCGGACAACGCTCGCTCCCTACGTCTT
>OTU_791
GGACTACCCGGGTTTCTAATCCTGTTCGCTACCCACGCTTTCGTGCCTCAGCGTCAATCAAGGCCCAGCTAGCTGCCTTC
GCAATTGGTGTTCCATGACATATCTATGCATTTCACCGCTACATGTCACATTCCGCTAACCTCAACCCAATTCAAGACAT
TCAGTATCAATGGCAATTTTATCGTTAAGCGACAAGATTTCACCACTGACTTAAATATCCGCCTACGCACCCTTTAAACC
CAGTGATTCCGGATAACGCTTGCACCCTCCGTATT
>OTU_792
GGACTACCAGGGTTTCTAATCCTGTTCGCTACCCATGCTTTCGCTTCTCAGTGTCAGTAATGGCCCAGAGACCTGCCTTC
GCCATCGGTGTTCTTCCTGATATCTGCGCATTTCACCGCTACACCAGGAGTTCCAGTCTCCCCTACCACACTCTAGCCTG
CCCGTACCCACCGCACGCCCGAGGTTGAGCCTCGGGTTTTCACGGCAGACGCGACAAGCCACCTACAAGCTCTTTACGCC
CAATAATTCCGGACAACGCTTGCGCCCTACGTATT
>OTU_793
GGACTACCGGGGTATCTAATCCTGTTTGCTCCCCTAGCTTTCGCAGATTAGCGTCAGGGCCAGACCAGAGAGCCGCTTTC
GCCACTGGCGTTCCTCCCGATATCTACAGATTTCACTCTTACACCGGGAATTCCGCTCTCCTCTTCTAGCCTCAAGCCAT
GCAGTTTTGAAGGCAGTTCTTAGGTTGAGCCTAAGGATTTCACCCCCAACTTGCATAGCCGCCTACCTGCCCTTTACACC
CAATAAATCCGAGTAACGCTCGCCATCTCTGTATT
>OTU_794
GGACTACTAGGGTATCTAATCCTGTTCGCTCCCCACGCTTTCGCTCCTCAGCGTCAGTGACGGCCCAGAGACCTGCCTTC
GCCATCGGTGTTCTTCCCGATATCTACACATTCCACCGTTACACCGGGAATTCCAGTCTCCCCTACCGCACTCCAGCCCG
CCCGTACCCGGCGCAGATCCACCGTTAAGCGATGGACTTTCACACCGGACGCGACGAGCCGCCTACGAGCCCTTTACGCC
CAATAAATCCGGATAACGCTTGCGCCCTACGTATT
>OTU_795
GGACTACCCGGGTATCTAATCCTGTTCGCTCCCCACGCTTTCGCTCCTCAGCGTCAGTTACTGCCCAGAGACCCGCCTTC
GCCACCGGTGTTCCTCCTGATATCTGCGCATTTCACCGCTACACCAGGAATTCCAGTCTCCCCTGCAGTACTCTAGTTTG
CCCGTATCGACTGCAGGCCCGAGGTTGAGCCTCGGGTTTTCACAGCCGACGTGACAGACCGCCTACGAGCTCTTTACGCC
CAATAATTCCGGACAACGCTTGCACCCTACGTATT
>OTU_796
GGACTACCCGGGTATCTAATCCTGTTTGCTACCCACGCTTTCGCGCCTCAGCGTCAGTCACTGTCCAGGGAGCCGCCTTC
GCCACTGGTGTTCCTTCCAATATCTACGAATTTCACCTCTACACTGGAAATTCCGCTCCCCTCTCCAGGACTCAAGGTCG
CCAGTATCCAATGCACGTCCTCGGTTGAGCCGAGGGATTTCACATCGGACTTTGCCACCCGCCTGCGCGCGCTTTACGCC
CAATAATTCCGAACAACGCTTGCACCCTCCGTATT
>OTU_797
GGACTACCGGGGTTTCTAATCCCGTTTGCGCCCCAGGGCTTCGTCCCTCACCGTCGGATTCGTTCTAGTGAGACGCCTTC
GCCACCGGTGGTCCTTCTAGGATTACAGGATTTTACCCCTACCCCAGAAGTACCTCTCACCTCTCCCGATCCCAAGTCTT
GCAGTCTCCCCGGACTTCGAACAGTTGAGCTGGTCGATTTACCCAAGGATTTACAAGACCGGCTACGGACGTTTTAGGCT
CAATAATATCGACCACCACTTGGGCCGCGGGTATT
>OTU_798
GGACTACCGGGGTTTCTAATCCTGTTTGCTCCCCACGCTTTCGCGTCTTAGCGTCAGTCACGTACCAGAGAGCTGCCTTC
GCCATTGGTGTTCCTCCTGATATCTGCGCATTCCACCGCTACACCAGGAATTCCACTCTCCTCTTCCGGACTCAAGCCCG
CCAGTATCCAGTGACCGCTTCCGGTTAAGCCGAAAGATTTCACACCAGACTTGGCGGGCCGCCTACACGCGCTTTACGCC
CAATAATTCCGGACAACGCTCGCTCCCTACGTATT
>OTU_799
GGACTACCAGGGTATCTAATCCTGTTTGCTCCCCACGCTTTCGTGCATGAGCGTCAGTACAGGCCCAGGGGATTGCCTTC
GCCATCGGTGTTCCTCCGCATATCTACGCATTTCACTGCTACACGCGGAATTCCATCCCCCTCTGCCGTACTCCAGCTAT
GCAGTCACTAATGCAGTTCCCAGGTTGAGCCCGGGGATTTCACATCCGTCTTACATAACCGCCTGCGCACGCTTTACGCC
CAGTAATTCCGATTAACGCTCGCACCCTACGTATT
>OTU_800
GGACTACTCGGGTATCTAATCCTGTTTGCTCCCCACGCTTTCGTGCATGAGCGTCAGTGTTATCCCAGGAGGCTGCCTTC
GCCATCGGTATTCCTCCACATCTCTACGCATTTCACTGCTACACGTGGAATTCTACCTCCCTCTGACACACTCTAGTCTC
GCAGTCACAAATGCACTTCCCAGGTTGAGCCCGGGGCTTTCACATCTGTCTTACGAAACCGCCTGCGCACGCTTTACGCC
CAGTAATTCCGATTAACGCTTGCACCCTACGTATT
>OTU_801
GGACTACAGGGGTTTCTAATCCTGTTTGCTCCCCTAGCTTTCGCGCCTCAGCGTCAGGTACAGTCCAGGAAGCCGCCTTC
GCCACTGGTATTCCCCCCGATATCTACGCATTTCACCGCTACACCGGGGATTCCACTTCCCTCTCCTGTCCTCAAGCCTG
CCAGTTTCAAGCGCAGTTTCAGAGTTGAGCCCTGAAATTTCACACCTGACTTAACAAGCCGCCTACACGCCCTTTACGCC
CAGTAACTCCGGACAACGCTCGCCCCCTACGTATT
>OTU_802
GGATACTAGGGTTTCTAATCCTGTTTGCTCCCCATGCTTTCGCACCTCAGTGTCAGTATTAGGCCAGATGGCTGCCTTCG
CCATCGGTATTCCTCCAGATCTCTACGCATTTCACCGCTACACCTGGAATTCTACCATCCTCTCCCATACTCTAGCTAAC
CAGTATCGAATGCAATTCCCAAGTTAAGCTCGGGGATTTCACATTTGACTTAATTAACCACCTACGCGCGCTTTACGCCC
AGTAAATCCGATTAACGCTCGCACCCTCTGTATTA
>OTU_803
GGACTACTCGGGTTTCTAATCCTGTTTGATCCCCACGCTTTCGTGCCTCAGCGTCAATCGTTGCTTAGTGGGCTGCCTAC
GCAATCGGTGTTCCGGGTCATATCTATGCATTTCACCGCTACATGACCCGTTCCGCCCACCTCAACAACATTCAAGACCA
ATAGTATCAATGGCAGTTTCCGGGTTGAGCCCGGAGATTTCACCGCTGACTTAAAAGTCCGCCTACACACCCTTTAAACC
CAGTAAATCCGGATAACGCTTGCACCCTCCGTATT
>OTU_804
GGACTACCCGGGTTTCTAATCCCGTTTGCTACCCACGCTTTCGTACATGAGCGTCAGACCAATGCCAGGGTGCCGCTTTC
GCCTCTGGTATTCCTCCCGATATCTACGCATTCCACCACTACACCGGGAATTCTGCACCCCTCTCATTGTCTCAAGCACA
GCAGTCTCCAACGACCTCTCCCAGTTAAGCCAGGAGATTTCACGTCAGACTTACCATGCCGCCTGCGTACGCTTTACGCC
CAGTAATTCCGGATAACGCTCGTCACCTACGTATT
>OTU_805
GGACTACTGGGGTTTCTAATCCCGTTCGCTCCCCATGCTTTCGCGTCTTAGCGTCAGGTCAGGCCCAGCGCGTCGCCTTC
GCCACTGGTGTTCCTCCGGATCTCTACGCATTTCACCACTACACCCGGAATTCCACACGCCTCTACCTGCCTCTAGTTCA
GCAGTTCCGCACGTCCTCGCCCGGTTGAGCCAGAGCGCTTTCACGCACGACTTGCTAAACCGCCTGCACGCGCTTTACAC
CCAGTAAATCCGGATAACGCTCGCCTCCTACGTTT
>OTU_806
GGACTACCAGGGTATCTAATCCTGTTTGATACCCACACTTTCGAGCATCAGTGTCAGTTGCAGTCCAGTGAGCTGCCTTC
GCAATCGGAGTTCTTCGTGATATCTAAGCATTTCACCGCTACACCACGAATTCCGCCCACCTCTACTGTACTCAAGACTG
ACAGTATCAACTGCAATTTTACGGTTGAGCCGCAAACTTTCACAACTGACTTACCAGTCCACCTACGCTCCCTTTAAACC
CAATAAATCCGGATAACGCTTGCTCCATACGTATT
>OTU_807
GGACTACAGGGGTATCTAATCCTGTTTGATACCCGCACTTTCGAGCCTCAGCGTCAGTTATGCCCCGGCACAATGCCTTC
GCGATCGGAGTTCTTCGTGATATCTAAGCATTTCACCGCTACACCACGAATTCCATGTGCCCTGTGCAGACTCAAGGCTT
ACAGTTTCAACGGCTTGACATGGTTGAGCCACGACATTTGACCGCTGACTTAAAAGCCCGCCTACGCTCCCTTTAAACCC
AATAAATCCGGATAACGCTCGCATCTTCCGTATTA
>OTU_808
GGACTACTCGGGTTTCTAATCCTGTTTGCTACCCACGCTTTCGTACCTCAGTGTCAGTTACAGTCCAGGAAGTCGCCTTC
GCCACTGATGTTCCTCCTAATATCTACGCATTTCACCGCTACACTAGGAATTCCACTTCCCTCTCCTGCACTCAAGTCTA
CTAGTTCGCATGGCTGGACGGGGTTAAGCCCCGTAATTTCACCACACGCTTAATAAACCACCTACGTACTCTTTACGCCC
AATCATTCCGGATAACGCTCGCCCCCTACGTATTA
>OTU_809
GGACTACCCGGGTTTCTAATCCTATTTGCTCCCCACGCTTTCGTGCCTCAGCGTCAGTGATGGCCCAGCAAGTCGCCTTC
GCCACTGGTGTTCCTTCTAATATCTACGCATTTAACCGCTACACTAGAAATTCCACTTGCCTCTACCATACTCAAGTCAA
TCAGTTTCTGTGGCGAACCGAAGTTAAGCTTCGGGCTTAGACCACAGACTTAATAGACCGCCTACGCACCCTTTACACCC
AATAAATCCGGATAACGCTCGCTCCCTACGTATTA
>OTU_810
GGACTACAAGGGTTTCTAATCCTGTTTGCTCCCCACACTTTCGAGCCTCAGCGTCAGTTAAAGCCCAGCAGGCCGCCTTC
GCCACTGGTGTTCCTCCGAATATCTACGCATTTCACCGCTACACTCGGAATTCCGCCTGCCTCTGCTCCACTCAAGAAAA
ACAGTTTCAACTGCACTCTATCGGTTAAGCCGTTAGTTTTCACAGCTGACTTGTCTCCCCGCCTGCGCTCCCTTTACACC
CAGTAATTCCGGACAACGCTCGCCACCTACGTATT
>OTU_811
GGACTACTCGGGTTTCTAATCCTGTTCGCTCCCCTAGCTTTCGTCTCTTAGCGTCAGGCCCACCCCAGGGCGCCGCCTTC
GCCACTGGTGTTCCTTCCGATATCTGCGCATTTTACCGCTACACCGGAAATTCCACGCCCCTCTGGTGGCCTCTAGTTCA
GCAGTCTTGTACGTCCTCTCCGGGTTAAGCCCGAAGCTTTCACGCCCAACTTACTGTTCCGCCTACAGACGCTTTACGCC
CAGTAAATCCGGATAACGCTCGCGTCCTACGTCTT
>OTU_812
GGACTACTGGGGTTTCTAATCCTGTTTGCTCCCCACGCTTTCGTACCTCAGTGTCAGTTACAGTCCAGAAAGCCGCCTTC
GCCACTGGTGTTCCTCCTAATATCTACGCATTTCACCGCTACACTAGGAATTCCGCTTTCCTCTCCTGCACTCAAGTCTC
CCAGTTCACAGGGCGAACTATGGTTGAGCCTTAGCCTTAAACCCTGTGCTTAGGAAACCACCTACGTACTCTTTACGCCC
AATAATTCCGGATAACGCTCGCCCCCTACGTATTA
>OTU_813
GGACTACCCGGGTATCTAATCCCGTTTGCTCCCCTAGCTTTCGCGCCTCAGCGTCAGTATCTGTCCAGGTAGCCGCCTTC
GCCGCAGGTGTTCCTCCCAATATCTACGCATTTCACCGCTACACTGGGAATTCCACTACCCCCTCCAGAACTCAAGCACA
ACAGTTTCAGATGCAGTTCCCAGGTTAAGCCCGGGGCTTTCACATCTGACTTGCCATGCCGCCTACGCGCCCTTTACGCC
CAGTAATTCCGAACAACGCTTGCCACCTCCGTATT
>OTU_814
GGACTACCAGGGTTTCTAATCCTGTTCGATACCCACGCTTTCGTGCCTCAGCGTCAGTCGTGTGCTGGAAAGCTGCCTTC
GCAATCGGGGTTCTGCGTGATATCTATGCATTTCACCGCTACACCACGCATTCCGCCTTCCTCGCACATACTCGAGCGCG
CCAGTTTCAACGGCTCTACGGCGTTGAGCGCCGCATTTTTACCGCTGACTTGACGCGCCGCCTGCGCACCCTTTAAACCC
AATAAATCCGGATAACGCTCGCATCCTCCGTATTA
>OTU_815
GGACTAACTCGGGTATCTAATCCTGTTTGATACCCACACTTTCGAGCATCAGCGTCAGTTACAGTCCAGTAAGCTGCCTT
CGCAATCGGAGTTCTTCGTGATATCTAAGCATTTCACCGCTACACCACGAATTCCGCCTACCTCTGCTGCACTCAAGACT
ACCAGTATCAACTGCAATTTTACGGTTGAGCCGCAAACTTTCACAACTGACTTAATAATCCGCCTACGCTCCCTTTAAAC
CCAATAAATCCGGATAACGCTTGGATCCTCCGTAT
>OTU_816
GGACTACAGGGGTTTCTAATCCCGTTTGCTACCCTAGCTTTCGCGTCTGAGTGTCAGGAATGGTCCAGGAGGCCGCCTTC
GCCACTGGTGTTCCTCCAGATATCTGCGCATTCCACCGCTACACCTGGAATTCCACCTCCCTCTACCATCCTCTAGCCTC
CCAGTATCAGACGCAGTTCCCAGGTTGAGCCGGGGGATTTCACGTCTGACTTAGAAGGCCGCCTACGCGCCCTTTACGCC
CAGTAATTCCGAACAACGCTTGCCACCTCTGTATT
>OTU_817
GGACTACAAGGGTTTCTAATCCTGTTCGCTACCCATGCTTTCGAGCCTCAGCGTCAGTTGCAGACCAGACAGCCGCCTTC
GCCACTGGTGTTCTTCCATATATCTACGCATTCCACCGCTACACATGGAGTTCCACTGTCCTCTTCTGCACTCAAGTCTG
ACAGTTTCCGATGCACTTTTTTGGTTAAGCCAAAGGCTTTCACATCAGACTTATCAAACCGCCTGCGCTCGCTTTACGCC
CAATAAATCCGGATAACGCTTGCCACCTACGTATT
>OTU_818
GGACTACAAGGGTATCTAATCCTGTTTGCTCCCCACGCTTTCGTGCATGAGCGTCAGTGCAGGCCCAGGGGATTGCCTTC
GCCATCGGTGTTCCTCCGCATATCTACGCATTTCACTGCTACACGCGGAATTCCATCCCCCTCTGCCGCACTCCAGCGAT
GCAGTCACAGATGCAGTTCCCAGGTTGAGCCCGGGGATTTCACAACTGTCTTACATCACCGCCTGCTCACGCTTTACGCC
CAGTAATTCCGATTAACGCTTGCACCCTACGTATT
>OTU_819
GGACTACTGGGGTATCTAATCCTGTTTGCTCCCCACGCTTTCGCGCCTCAGCGTCAGTTACAGTCCAGTAAGTCGCCTTC
GCCACTGGTGTTCCTCCTAATATCTACGCATTTCACCGCTACACTAGGAATTCCACTTACCTCTCCTGCACTCAAGCTAG
CCAGTTTCAAATGCAATCCCGCAGTTAAGCCCCGGGTTTTCACATCTGACTTAATTAACCGCCTACGCGCCCTTTACGCC
CAGTAATTCCGGACAACGCTCGCCACCTACGTATT
>OTU_820
GGACTACTCGGGTTTCTAATCCTGTTTGCTCCCCACGCTTTCGTGCCTCAGCGTCAGTTGCAGTCCAGAAAGCCGCCTTC
GCCACTGGTGTTCTTCCTAATATCTACGCATTTCACCGCTACACTAGGAATTCCGCTTTCCTCTCCTGCACTCTAGCTCC
GCAGTTTCCATTGCACTTCGCTGGTTAAGCCATCACCTTTCACAACAGACTTACGTTGCCGCCTACGCACCCTTTACACC
CAGTAATTCCGGATAACGCTCGCCCCCTACGTATT
>OTU_821
GGACTACTCGGGTTTCTAATCCCGTTCGCTGCCCTAGCTTTCGCACATGAGCGTCAGTATTGTGCCAGGAAGCCGCCTTC
GCCACTGGTGTTCCTCCCGATATCTACGCATTTCACCGCTACACCGGGAATTCCGCTTCCCTCTCACATACTCCAGATTT
ACAGTATCGATAGATATACAGAGGTTGAGCCTCCGCCTTTGACTACCGACTTATAATTCAGCCTGCGTGCGCTTTACGCC
CAGTAATTCCGGACAACGCTTGCCCCCTACGTATT
>OTU_822
GGACTACTCGGGTATCTAATCCTGTTTGCTCCCCACGCTTTCGTGCCTCAGTGTCAGTAACAGTCCAGAAAGCCGCCTTC
GCCACTGGTGTTCCTCCTAATATCTACGCATTTCACCGCTACACTAGGAATTCCGCTTTCCTCTCCTGCACTCAAGTAGC
CCAGTTCAGGGGGCTAACAATGGTTGAGCCATTGCCTTTCACCCCCTGCTTAGGTAACCACCTACGCACTCTTTACGCCC
AATAATTCCGGATAACGCTTGCCCCCTACGTATTA
>OTU_823
GGACTACAGGGGTTTCTAATCCTGTTTGCTCCCCACGCTTTCGTGCATCAGCGTCAGTATTGGCTTAGAGAGCTGCCTTC
GCAATCGGTGTTCTGTGTCATATCTAAGCATTTCACCGCTACATGACACATTCCGCCCTCCTCAACCATACTCAAGATCG
TCAGTATCAATGGCAATTCTACAGTTGAGCTGTAGGCTTTCACCACTGACTTAACAACCCGCCTACGCACCCTTTAAACC
CAATAAATCCGGATAACGCTTGGGACCTTCGTATT
>OTU_824
GGACTACACGGGTATCTAATCCCGTTTGCTCCCCTGGCCTTCGTGCCTCAGCGTCAGGAACTGTCCAGAGATTCGCCTTC
GCCACTAGTGTTCCTCACAATATCTACGCATTTCACTGCTCCACTGTGAATTCCAATCTCCTCTCCAGTCCTCAAGCACG
GCAGTATCGGATGCAATTCCGAAGTTGAGCTCCGGGCTTTCACATCTGACTTACCGTGCAGCCTACGCACCCTTTACGCC
CAGTGATTCCGAACAACGCTTGAGACCTCTGTATT
>OTU_825
GGACTACACGGGTATCTAATCCTGTTTGCTCCCCACGCTTTCGAGCCTCAGCGTCAGTTAAAGCCCAGCAGGCCGCCTTC
GCCACTGGTGTTCCTCCTAATATCTACGCATTTCACCGCTACACTAGGAATTCCGCCTGCCTCTACTTCACTCAAGAACG
GCAGTTTAGAACGCAACAACCAGTTGAGCCGGCTGTTTTCACATTCTACTTGCCATCCCGCCTACGCTCCCTTTACACCC
AGTAATTCCGGACAACGCTCGCTCCCTACGTATTA
>OTU_826
GGACTACCCGGGTTTCTAATCCCGTTTGCTACCCTAGCTTTCGCGTCTTAGCGTCAGAAATGGTCTAGAAGGCCGCTTTC
GCCACTGGTGTTCCTCCGGATATCTACGCATTTCACCACTACACCCGGAATTCCACCTTCCTCTCCCATTCTCTAGTCTG
ATAGTTTTGAACGACCGCTCCCAGTTAAGCCGGGAGATTTCACATCCAACTTATCAAACCGCCTGCACGCGCTTTACGCC
CAGTAAATCCGAATAACGTTAGCCTCCTACGTATT
>OTU_827
GGACTACTCGGGTTTCTAATCCTGTTTGCTCCCCACGCTTTCGTGTCTCAGCGTCAGTATTGGCCTAGTGAGCCGCCTTC
GCCACTGGTGTTCTTCCATATATTTACGCATTTTACCGCTACACATGGAGTTCCACTCACTTCTACCATACTCTAGACTA
TCAGTTTCTTTGGCACTACGGCGTTGAGCACCGCATTTTAACCAAAGACTTGATAACCCGCCTACGCACCCTTTACGCCC
AATAATTCCGGATAACGCTTGCCCCCTACGTATTA
>OTU_828
GGACTACACGGGTTTCTAATCCTGTTCGCTCCCCTAGCTTTCGCGCCTCAGCGTCAGTTGCGGCCCAGCAGGCTGCCTTC
GCCATCGGTGTTCTTCCCGATATCTGCGCATTCCACCGCTACACCGGGAATTCCGCCTGCCTCTACCGAACTCGAGCCTC
CCAGTTCGGGATCCGGCCGGGGGTTGAGCCCTCGGATTAGAGATCCCGCTTGAGAGGCCGCCTACGCGCTCTTTACGCCC
AATGATTCCGGATAACGCTCGCTCCCTACGTATTA
>OTU_829
GGACTACCGGGGTTTCTAATCCTGTTTGCTCCCCACACTTTCGTGCTTTAGCGTCAGTTTTGAGCCAGGCAACTGCCTTC
GCCATTGGTGTTCTATCTGATATCTACGCATTTCACTGCTACACCAGATATTCCATTGCCCTCTCTCAAACTCTAGACTT
TCAGTATCAAAGGCAGCTCCAAAGTTAAGCTTTGGGATTTCACCTCTGACTTAAAAGTCCACCTGAGCACCCTTTACACC
CAGTAAATCCGGACAACGCTTGCCCCCTACGTATT
>OTU_830
GGACTACTCGGGTATCTAATCCTGTTTGCTCCCCACGCTTTCGCGCCTCAGCGTCAGTTAATGTCCAGCAGGCCGCCTTC
GCCACTGGTGTTCCTCCGTATATCTACGCATTTCACCGCTACACACGGAATTCCGCCTGCCTCTCCATTACTCAAGACCA
GCAGTTTTGAAAGCAGTTCGGGGGTTAAGCCCCCGGATTTCACTTCCAACTTGCCGGCCCGCCTGCGCGCCCTTTACACC
CAGTAAATCCGGATAACGCTTGCTCCCTACGTATT
>OTU_831
GGACTACACGGGTTTCTAATCCTGTTTGCTACCCACGCTTTCGCACCTCAGCGTCAGGGTCAGTCCAGACAGTCGCCTTC
GCCACTGGTGTTCCTCCTGATTTCTACGCATTTCACCGCTACACCAGGAATTCCACTGCCCTCTCCTGCCCTCAAGATAC
CCAGTTTCAAATGCAACCCCGCAGTTGAGCTGCGGTCTTTCACATCTGACTTAAATATCCGCCTACGTGCTCTTTACGCC
CAGTAATTCCGGACAACGCTCGCCCCCTACGTCTT
>OTU_832
GGACTACTGGGGTTTCTAATCCTGTTTGCTCCCCACGCTTTCGCACCTCAGCGTCAGTACCGATCCAGTGGGCCGCCTTC
GCCACCGGTATTCTTCCTAATATCTACGAATTTCACCTCTACACTAGGAATTCTACCCACCTCTATCGGACTCGAGACCA
TCAGTATCAAAGGCAGTTCCGAGGTTGAGCCCCGGGATTTCACCCCTGACTAAATGATCCGCCTACGTGCGCTTTACGCC
CAGTGATTCCGAACAACGCTAGTCCCCTTCGTATT
>OTU_833
GGACTACCGGGGTTTCTAATCCTGTTCGCTCCCCACGCTTTCGTGCCTCAGCGTCAGTTTCCAGTCCAGAAAGCCGCCTT
CGCCACTGGTGTTCTTCCTAATATCTACGCATTTCACCGCTACACTAGGAATTCCGCTTTCCTCTCCTGTACTCTAGCTT
AGCAGTTTAAAATGCAATCCCGAGGTTAAGCCTCGGGCTTTCACATCTTACTTGCCATGCCGCCTACTCACCCTTTACAC
CCAGTAATTCCGGATAACGCTTGCCCCCTACGTAT
>OTU_834
GGACTACCCGGGTTTCTAATCCTGTTTGCTCCCCTAGCTTTCGCGCCTCAGCGTCAGGTACAGTCCAGGAAGCCGCCTTC
GCCACTGGTGTTCCTCCCGATATCTACGCATTTCACCGCTACACCGGGAATTCCACTTCCCTCTCCTGTCCTCTAGCCTG
CCAGTTTCAAGCGCAGTTCCAGGGTTAAGCCCTGGAATTTCACACCTGACTTAACAAACCGCCTACACGCCCTTTACGCC
CAATAACTCCGGACAACGCTCGCCCCCTACGTATT
>OTU_835
GGACTACTGGGGTTTCTAATCCCGTTCACTCCCCTAGCTTTCGCCTCTCAGCGTCAGGTCTGGTCCAGGAGGCCGCTTTC
GCCACTGGTGTTCCTCCCGATCTCTACGCATTTCACCACTACACCGGGAATTCCACCTCCCTCTACCAGCCTCCAGTGGG
GCAGTCTTGACCGGCCTCTCCCAGTTGAGCCGGGAGCTTTCACAGCCAACTTACCTCACCGCCTACAGGCGCTTTACGCC
CAGTAAATTCGGATAACGCTTGGCTCCTACGTTTT
>OTU_836
GGACTACTAGGGTTTCTAATCCTGTTTGATCCCCACGCTTTCGTGCCTCAGTGTCAATATTCGAGTAGCCAGCTGCCTTC
GCAATTGGTGTTCTATGTCATATCTAAGCATTTCACCGCTACATGACATATTCCGCTGACCTCCACGGTATTCAAGACTG
ATAGTATCAATGGCAGTTTCCAAGTTAAGCTCGGAGATTTCACCACTGACTTACCAACCCACCTACGCACCCTTTAAACC
CAGTGAATCCGGATAACGCTTGCACCCTCCGTATT
>OTU_837
GGACTACCGGGGTATCTAATCCTGTTCGATACCCGCGCTTTCGAGCATGAGCGTCAGTAGCGCTCCCGTCAGCTGCCTTC
GCAATCGGAGTTCTTCGCCATATCTAAGCATTTCACCGCTACACGGCGAATTCCGCCAACGTCGTGCGTACTCAAGGACA
CCAGTTCGCGCTGCGGTGCAGACGTTGGGCGCCTACATTTCACAACACGCTTAATACCCGGCCTGCGCTCCCTTTAAACC
CAATAAATCCGGATAACGCCCGGACCTTCCGTATT
>OTU_838
GGACTACAAGGGTTTCTAATACTGTTTGCTCCCCACGCTTTCGAGCCTCAATGTCAGTTACAGTCCAGTAAGCCGCCTTC
GCCACCGGTGTTCCTCCTAATATCTACGCATTTCACCGCTACACTAGGAATTCCGCTTACCTCTCCTGCACTCTAGCTTA
ACAGTTTCCAAAGCAGTCCCGGGGTTAAGCCCCGGGCTTTCACTTCAGACTTGCCATGCCATCTACGCTCCCTTTACACC
CAGTAAATCCGGATAACGCTTGCCCCCTACGTATT
>OTU_839
GGACTACCAGGGTTTCTAATCCCGTTCGCTCCCCTGGCTTTCGCACCTCAGCGTCAGATATGGACCAGGCAGCCGCCTTC
GCCACGGGTGTTCCTCCTGATATCTACGCATTTCACCGCTACACCAGGAATTCCACTGCCCTCTTCCATCCTCAAGTCTC
CCAGTTTTGGATGCAGTTCTGCGGTTGGGCCGCAGGATTTCACATCCAACTTAAAAGACCGCCTACGCGCGCTTTACGCC
CAGTGACTTCGGACAACGCTCGCCCCCTACGTATT
>OTU_840
GGACTACTAGGGTTTCTAATCCCGTTCGCTACCCTAGCTTTCGCACATGAGCGTCAGTATTGTGCCAGGAAGTCGCCTTC
GCCACTGGTGTTCCTCCCGATATCTACGCATTTCACCGCTACACCGGGAATTCCACTTCCCTCTCACATACTCTAGTCTT
ACAGTATCGATAGATAAACGAAAGTTGAGCCTCCGCCTTTGACTACCGACTTATAAGTCAGCCTGCGTGCGCTTTACGCC
CAGTAATTCCGGACAACGCTTGCCCCCTACGTATT
>OTU_841
GGACTACAGGGGTTTCTAATCCCGTTCGCTCCCCTGGCTTTCGCGCCTCAGCGTCAGATACGGACCAGGCAGCCGCCTTC
GCCACGGGTGTTCCTCCTGATATCTACGCATTTCACCGCTACACCAGGAATTCCACTGCCCTCTCCCGTCCTCAAGTCGC
CCAGTTTTGGATGCAGTTCTGGGGTTGGGCCCCAGGATTTCACATCCAACTTAAGCAACCGCCTACGCGCGCTTTACGCC
CAGTAACTTCGGACAACGCTCGCCCCCTACGTATT
>OTU_842
GGACTACAGGGGTTTCTAATCCTGTTCGCTCCCCACGCTTTCGTCCCTCAGCGTCAGTTGTATCTTAGTGACCTGCCTTC
GCAATTGGTGTTCTAAGTAATATCTATGCATTTCACCGCTACACTACTTATTCCAGCCACTTCAAATACACTCAAGACTA
ACAGTATCAACGGCAGCTCTACAGTTAAGCTGCAGGATTTCACCGCTGACTTATCAGCCCACCTACGGACCCTTTAAACC
CAATAAATCCGGATAACGCTTGCACCCTCCGTATT
>OTU_843
GGACTACTAGGGTTTCTAATCCTGTTTGCTCCCCATGCTTTCGTCCCTGAGTGTCAGTTATCGTCCAGAAATCTGCCTTC
GCTTTCGATGTTCTTCCAGATATCTACGCATTCCACCGCTACACCTGGAATTCCAATTTCCTCTCCGATACTCAAGTCCA
ACAGTCTCCAACGCAGTTCCGGAGTTGAGCTCCGGTATTTCACGTCAGACTTATCAGACCACCTGCGGACCCTTTACGCC
CAATGAATCCGAACAACGCTCGCCACCTACGTATT
>OTU_844
GGACTACAGGGGTATCTAATCCCGTTCGCTACCCTAGCTTTCGCGTCTGAGCGTCAGAAATGGTCCAGGAGGCCGCTTTC
GCCACTGGTGTTCCTCCGGATATCTACGCATTTCACCACTACACCCGGAATTCCACCTCCCTCTACCACTCTCAAGTTCA
GTAGTTTTGAACGACCTCTCCCAGTTAAGCCGGGAGCTTTCACATCCAACTTGCTGAACCGCCTGCACGCGCTTTACGCC
CAGTAAATCCGGATAACGCTCGTCTCCTACGTGTT
>OTU_845
GGACTACCCGGGTTTCTAATCCCGTTTGCTCCCCTGGCTTTCGCGCCTCAGCGTCAGTGTCAGCCCAGCAACCCGTCTTC
ACCTCAGGTGTTCCTCTTGATATCTACGCATTTCACCGCTACACCAAGAATTCCGATTGCCCCTTCTGCACTCTAGCATT
GCAGTATCACTTGGCCGTTCTGAGTTAAGCTCAGAGATTTCACAAGTGACTTACAAAGCCGCCTACGCGCCCTTTACGCC
CAGTAAATCCGAACAACGCTTGGTCCCTACGTATT
>OTU_846
GGACTACCCGGGTATCTAATCCTGTTTGATCCCCACGCCTTCGTGCATCAGCGTCAGTAGCGTACTAGTAAGCTGCCTTC
GCAATCGGAGTTCTGTGCCATATCTATGCATTTCACCGCTACACGGCACATTCCGCCTACCTCGCTCGCACTCAAGATCA
CCAGTTTCAACGGCAATTTTACGGTTAAGCCGAAAAATTTCACCGCTGACTTGATAACCCGCCTACGCACCCTTTAAACC
CAATAAATCCGGATAACGCTTGCATCCTCCGTATT
>OTU_847
GGACTACTCGGGTTTCTAATCCTGTTTGATCCCCACGCTTTCGTGCCTCAGTGTCAATCACTGTGTAGTAAGCTTCCTTC
GCAATTGGTGTTCTATGTCATATCTAAGCATTTCACCGCTACATGACATATTCCGCTTACCTCCAAAGTATTCAAGACTA
ATAGTATCAATGGCAGTTTCCGGGTTAAGCCCGGAGATTTCACCACTGACTTACCAGTCCACCTACGCACCCTTTAAACC
CAGTAAATCCGGATAACGCTTGCACCCTCCGTATT
>OTU_848
GGACTACCGGGGTATCTAATCCTGTTTGCTCCCCACGCTTTCGCGCCTCACCGTCAGTTGTCGTCCAGTAACCCGCCTTC
GCCACTGGTGTTCTTCCTAATATCTACGCATTTCACCGCTACACTAGGAATTCCGGTTACCTCTCCGATACTCAAGACCG
ACAGTTTCAAATGCAGTTTGGAGGTTGAGCCTCCAGATTTCACATCTGACTTATCAGCCCGGCTACACGCCCTTTACACC
CAGTAAATCCGGACAACGCTTGCCACCTACGTATT
>OTU_849
GTGCCAGCAGCCGCGGTAATACGTAGGGGGCAAGCGTTATCCGGATTTACTGGGTGTAAAGGGAGCGTAGACGGAGCAGC
AAGTCTGATGTGAAAGGCAGGGGCTCAACCCCTGGACTGCATTGGAAACTGTTGATCTTGAGTACCGGAGGGGTAAGCGG
AATTCCTAGTGTAGCGGTGAAATGCGTAGATATTAGGAGGAACACCAGTGGCGAAGGCGGCTTACTGGACGGTAACTGAC
GTTGAGGCTCGAAAGCGTGGGGAGCAAACAGGATT
>OTU_850
GGACTACCCGGGTTTCTAATCCTGTTTGCTCCCCACGCTTTCGTGCCTCAACGTCAGTGTTGATCCAGATGGCCGCCTTC
GCCACGGATGTTCCTCCCGATCTCTACGCATTTCACCGCTACACCGGGAATTCCGCCATCCTCTATCACACTCTAGTCCG
ACAGTATCGGATGCAGTTCCCAGGTTGAGCCCGGGGCTTTCACATCCGACTTACCGAACCATCTACGCACGCTTTACGCC
CAGTAATTCCGATTAACGCTTGCACCCTTCGTATT
>OTU_851
GGACTACTGGGGTTTCTAATCCTGTTTGCTCCCCACGCTTTCGAGCCTCAGCGTCAGTAAAAGCCCAGCAAGCCGCCTTC
GCCACTGGTGTTCCTCCTAATATCTACGCATTTCACCGCTACACTAGGAATTCCGCTTGCCTCTACTTCACTCAAGAGGT
CCAGTTTTGGATGCAGCCCCGCAGTTGAGCTGCGGTATTTCACATCCAACTTAAACCCCCGCCTACGCTCCCTTTACACC
CAGTAATTCCGGACAACGCTCGCCACCTACGTATT
>OTU_852
GGACTACTGGGGTTTCTAATCCTGTTTGCTCCCCACACTTTCGAGCCTCAGCGTCAGTTAAAGCCCAGCAAGCCGCCTTC
GCCACTGGTGTTCCTCCGAATATCTACGCATTTCACCGCTACACTCGGAATTCCGCTTGCCTCTACTTCACTCAAGAACT
ACAGTTTTGGATGCAGTTCCGTGGTTAAGCCACGGTATTTCACATCCAACTTGCAGTCCCGCCTGCGCTCCCTTTACACC
CAGTAAATCCGGATAACGCTTGCATCCTACGTATT
>OTU_853
GGACTACCAGGGTTTCTAATCCTGTTCGATCCCCACGCTTTCGTGCCTCAGCGTCAATAAAAGACCAGATAGCTGCCTTC
GCAATTGGTGTTCTATGGCATATCTATGCATTTCACCGCTACATGCCACATTCCGCCATCCTCATCCTTATTCAAGATAA
CCAGTATCCAAGGCAATTTTATCGTTAAGCGACAAACTTTCACCTTAGACTTAATCATCCGCCTACGCACCCTTTAAACC
CAGTAATTCCGGATAACGCTCGCACCCTCCGTATT
>OTU_854
GGACTACCGGGGTTTCTAATCCTGTTTGCTCCCCACGCTTTCGAGCCTCAGCGTCAGTAAAAGCCCAGTTGGCCGCCTTC
GCCACTGATGTTCCTCCTAATATCTACGCATTTCACCGCTACACTAGGAATTCCGCCAACCTCTACTTCACTCAAGAACA
GCAGTTTTAAGTGCAGTCTATGGGTTAAGCCCATAGATTTCACACCTAACTTGCCATCCCGCCTACGCTCCCTTTACACC
CAGTAATTCCGGACAACGCTCGCTCCCTACGTATT
>OTU_855
GGACTACCGGGGTATCTAATCCTGTTTGATCCCCACGCTTTCGTGCCTCAGCGTCAGTGTCGGCTCAGTAAGCTGCCTAC
GCAATTGGTGTTCTGTGTAATATCTAAGCATTTCACCGCTACATTACACATTCCGCCTGCCTTGACCACACTCAAGATAA
ACAGTATCAACGGCAAGTCTACAGTTAAGCTGCAGCCTTTCACCACTGACTTATTCATCCGCCTACGCACCCTTTAAACC
CAATAAATCCGGATAACGCTCGCATCCTCCGTATT
>OTU_856
GGACTACTGGGGTTTCTAATCCTGTTTGCTCCCCACGCTTTCGTGCCTCAGCGTCAGTGCTGGTCCAGATGGCCGCCTTC
GCCACGGATGTTCCTCCCGATCTCTACGCATTTCACCGCTACACCGGGAATTCCGCCATCCTCTACCGCACTCCAGCCCG
CCAGTTTCCCATGCCATTCCCAGGTTGAGCCCAGGGCTTTCACATCGGACACAACGAACCGCCTACGCACGCTTTACGCC
CAGTAATTCCGATTAACGCTTGCACCCTTCGTATT
>OTU_857
GGACTACCCGGGTTTCTAATCCTGTTTGCTCCCCACGCTTTCGCACCTCAGCGTCAGTACCGGACCAGTTGGCCGCCTTC
GCCACTGGTGTTCTTGCGAATATCTACGAATTTCACCTCTACACTCGCAGTTCCACCAACCTCTTCCGGACTCGAGATCC
CCAGTATCAAAGGCAGTTCCAAGGTTGATCCTTGGGATTTCACCCCTGACTTAAAGATCCGCCTACGTGCGCTTTACGCC
CAGTGATTCCGAGCAACGCTAGCCCCCTTCGTATT
>OTU_858
GGACTACTCGGGTATCTAATCCTGTTTGCTCCCCACGCTTTCGAGCCTCAGCGTCAGTTATCGTCCAGCAAGCCGCCTTC
GCCACTGGTGTTCTTCCTAATATCTACGCATTTCACCGCTACACTAGGAATTCCGCTTGCCTCTCCGACACTCCAGCCGA
ACAGTTTCCAATGCAGTCCCGGGGTTGAGCCCCGGGTTTTCACATCAGACTTGCCCTGCCGCCTACGCTCCCTTTACACC
CAGTAAATCCGGATAACGCTTGCTCCATACGTATT
>OTU_859
GGACTACAGGGGTTTCTAATCCTGTTCGCTACCCATGCTTTCGAGCCTCAGCGTCAGTAACAGACCAGAGAGCCGCCTTC
GCCACCGGTGTTCTTCCATATATCTACGCATTTCACCGCTACACATGGAGTTCCACTCTCCTCTTCTGTACTCAAGCTCG
ACAGTTTCTGATGCAATTCTCCGGTTGAGCCGAAGGCTTTCACATCAGACTTATCGAGCCGCCTGCACTCGCTTTACGCC
CAATAAATCCGGACAACGCTTGCCACCTACGTATT
>OTU_860
GGACTACCGGGGTTTCTAATCCTGTTTGCTCCCCACGCTTTCGCGCCTCAGCGTCAGTTACTGTCCAGAAAGCCGCCTTC
GCCACTGGTGTTCCTCCTAATATCTACGCATTTCACCGCTACACTAGGAATTCCGCTTTCCTCTCCAGCACTCAAGATGT
CCAGTTTCAGATGCAGCGCCGGAGTTAAGCCCCGGAATTTCACATCTGACTTGGTCACCCGCCTACACGCCCTTTACACC
CAGTAATTCCGGACAACGCTTGCCACCTACGTATT
>OTU_861
GGACTACTCGGGTTTCTAATCCTGTTTGCTCCCCACGCTTTCGAGCCTCAGTGTCAGTTACAGTCCAGTAAGCCGCCTTC
GCCACTGGTGTTCCTCCTAATATCTACGCATTTCACCGCTACACTAGGAATTCCACTTACCTCTCCTGCACTCTAGCAAG
TCAGTTTCAAATGCAGTCCCGGGGTTGAGCCCCGGGCTTTCACATCTGACTTGATTTGCCACCTACGCTCCCTTTACACC
CAGTAAATCCGGATAACGCTTGCCCCCTACGTATT
>OTU_862
GGACTACTAGGGTATCTAATCCGGTTTGCTCCCCCAGCTTTCGTCCCTCACTGTCGGAGCCGTTCTAGTGAGACGCCTTC
GCCACAGGTGGTCCCCCAAGGATTACAGGATTTCACTCCTACCCCTGGAGTACCTCTCACCTCTCCCGGTCCCTAGGTTG
CCAGTATCTCCTGAACGCCCATCGGTTGAGCCGATGGATTTCCCAGGAGACTTAACAACCAAGCTACGGACGCTTTAAGC
CCAGTAATAGTGGCCACCACTCGAGCCGCCGGTAT
>OTU_863
GGACTACCGGGGTTTCTAATCCTGTTTGCTACCCACGCTTTCGAGCATGAACGTCAGTGTTATCCCAGGGGGCTGCCTTC
GCCATCGGTATTCCTCCACATATCTACGCATTTCACTGCTACACGTGGAATTCTACCCCCCTCTGACACACTCTAGCTAC
CCAGTTTCATATGCACGTCCCGAGTTAAGCTCGGGGATTTCACATCTGACTTAAATAACCGTCTGCGCTCGCTTTACGCC
CAGTAATTCCGATTAACGCTCGCACCCTACGTATT
>OTU_864
GGACTACCGGGGTATCTAATCCGGTTTGCTCCCCCAGCTTTCGTCCCTCACTGTCGAAGCCGTTCTGGTGAGGCGCCTTC
GCCACAGGTGGTCCCTCGAGGATTACAGGATTTCACTCCTACCCCCGAAGTACCCCTCACCTCTCCCGGTTCCAAGATTG
CCAGTATCCCTTAGACGCCTGACGGTTGAGCCGTCAGATTTCCCAAGAGACTTAACAACCCAGCTACGAACGCTTTAAGC
CCAATAAAAGTGGCCACCACTCGAGCCGCCGGTAT
>OTU_865
GGACTACTAGGGTATCTAATCCTGTTTGATCCCCACACTTTCGTGCCTCAGCGTCAATAACGGCTTTGTGAGATGCCTTC
GCAATCGGTGTTCTGTGTAATATCTATGCATTTCACCGCTACACTACACATTCCTCCCACAGCATCCGCATTCAAGAACG
ACAGTTTCAACGGCACGGCACAGGTTGAGCCTGTGAGTTTCACCGCTGACTTATCATTCCGCCTACGCACCCTTTAAACC
CAATAAATCCGGATAACGCTCGCATCCTCCGTATT
